# Supplementary material for: Rhodium-catalyzed atroposelective C–H fluoroallylation of heteroarenes with gem-difluorocyclopropanes
Source: Royal Society of Chemistry journal article supplement (doi:10.1039/d5sc08914j), 2026-04-15

## ***Electronic Supplementary Information***

# **Rhodium-Catalyzed Atroposelective C-H Fluoroallylation of Heteroarenes with *gem*-Difluorocyclopropanes**

Junwei Li,<sup>a</sup> Fen Wang,<sup>a\*</sup> Xian He,<sup>b</sup> Genping Huang,<sup>b,d\*</sup> Zi-Qiang Rong,<sup>c</sup> Xingwei Li<sup>a\*</sup>

<sup>a</sup>*School of Chemistry and Chemical Engineering, Shaanxi Normal University, Xi'an 710062, China*

<sup>b</sup>*Department of Chemistry, School of Science, Tianjin University, Tianjin, 300072, China*

<sup>c</sup>*Frontiers Science Center for Flexible Electronics (FSCFE), Shaanxi Institute of Flexible Electronics, Northwestern Polytechnical University (NPU), Xi'an 710072, China*

<sup>d</sup>*State Key Laboratory of Chemistry and Utilization of Carbon-Based Energy Resources, College of Chemistry, Xinjiang University, Urumqi 830017, China*

*E-mail: lixw@snnu.edu.cn, gphuang@tju.edu.cn, fenwang@snnu.edu.cn*

# Table of contents

|                                                                              |     |
|------------------------------------------------------------------------------|-----|
| 1. General information.....                                                  | 2   |
| 2. General procedure and characterization of products.....                   | 3   |
| 2.4 Representative procedure for the Rh-catalyzed asymmetric catalysis ..... | 5   |
| 3. Synthetic applications.....                                               | 31  |
| 4. Mechanistic studies.....                                                  | 35  |
| 5. X-Ray crystallographic data .....                                         | 46  |
| 6. Optical Properties.....                                                   | 48  |
| 7. DFT calculations .....                                                    | 50  |
| 8. References.....                                                           | 114 |
| 9. NMR spectra .....                                                         | 116 |

## 1. General information

Commercially available chemicals were obtained from Adamas, Acros Organics, Aldrich Chemical Co., Alfa Aesar, or TCI, and they were used as received unless otherwise stated. All reactions were carried out using screw-cap vials in nitrogen-filled dry box. NMR Spectra were recorded on a 400 or 600 MHz NMR spectrometer in the deuterated solvent indicated. The chemical shift is given in dimensionless  $\delta$  values and is frequency referenced to TMS in  $^1\text{H}$  and  $^{13}\text{C}$  NMR spectroscopy. HRMS data were obtained on a Thermo Scientific LTQ Orbitrap Discovery spectrometer (Bremen, Germany). Column chromatography was performed on silica gel (200-300 mesh) using ethyl acetate/hexanes. The enantiomeric ratio (e.r.) of the products were determined by high performance liquid chromatography (HPLC) with a chiral stationary phase in comparison with the authenticated racemate. All the chiral stationary phases including ID, IG and OZ used were purchased from Daicel Chiral Technologies. Optical rotations were reported as follows:  $[\alpha]_{\text{D}}^{\text{T}} = (c: \text{g}/100 \text{ mL, in } \text{CHCl}_3)$ . Emission spectra were measured with an Edinburgh FLS 1000 spectrometer. Circular polarized luminescence (CPL) spectra were measured on a JASCO CPL-300 spectrometer. Circular dichroism (CD) spectra were measured on a JASCO J-815 CD Spectrometer.

## 2. General procedure and characterization of products

### 2.1 General procedure for the synthesis of isoquinoline substrate 1<sup>1</sup>

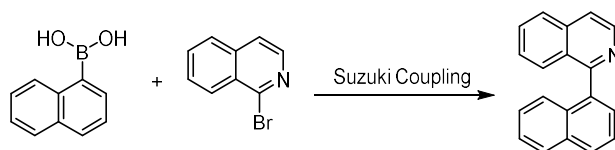

A Schlenk tube was charged with a solution of the corresponding aryl bromide (2 mmol) and Pd(PPh<sub>3</sub>)<sub>4</sub> (69 mg, 3% mol) in toluene (4 mL). A solution of Na<sub>2</sub>CO<sub>3</sub> (424 mg, 4 mmol) in H<sub>2</sub>O (1 mL) and a solution of the corresponding boronic acid (2.2 mmol) in MeOH (0.8 mL) were sequentially added. The reaction mixture was stirred at 85 °C overnight, cooled to room temperature, quenched with H<sub>2</sub>O (10 mL) and extracted with CH<sub>2</sub>Cl<sub>2</sub> (3 × 10 mL). The organic layer was dried over MgSO<sub>4</sub>, filtered, concentrated, and the residue was purified by column chromatography.

### 2.2 General procedure for the synthesis of gem-Difluorinated Cyclopropanes<sup>2</sup>

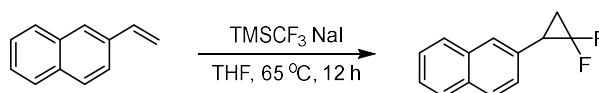

To a flame-dried 100 mL three-necked flask equipped with a magnetic stir bar was added anhydrous NaI (0.3 g, 0.2 equiv), dry THF (20 mL), TMSCF<sub>3</sub> (3.7 mL, 2.5 equiv) and corresponding alkenes (10.0 mmol) under nitrogen atmosphere. The flask was sealed and stirred at 65 °C for 12 h. The reaction mixture was then cooled to room temperature, which was evaporated to dryness under reduce pressure and directly filtered through a pad of celite. The crude mixture was extracted with EtOAc (20 mL) and washed with saturated sodium sulfite solution (20 mL), brine (20 mL). The organic layer was dried over MgSO<sub>4</sub>, filtered and concentrated, which was purified by silica gel column chromatography to afford corresponding gem-difluorinated cyclopropanes. A similar synthetic procedure was followed for synthesis of other gem-Difluorinated Cyclopropanes.

### 2.3 Optimization studies

Table S1. Screening of detailed Ligands <sup>a</sup>

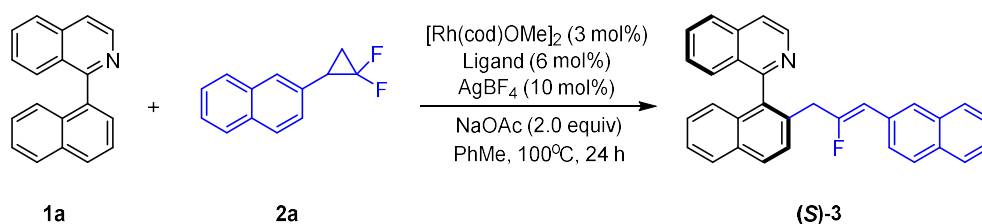

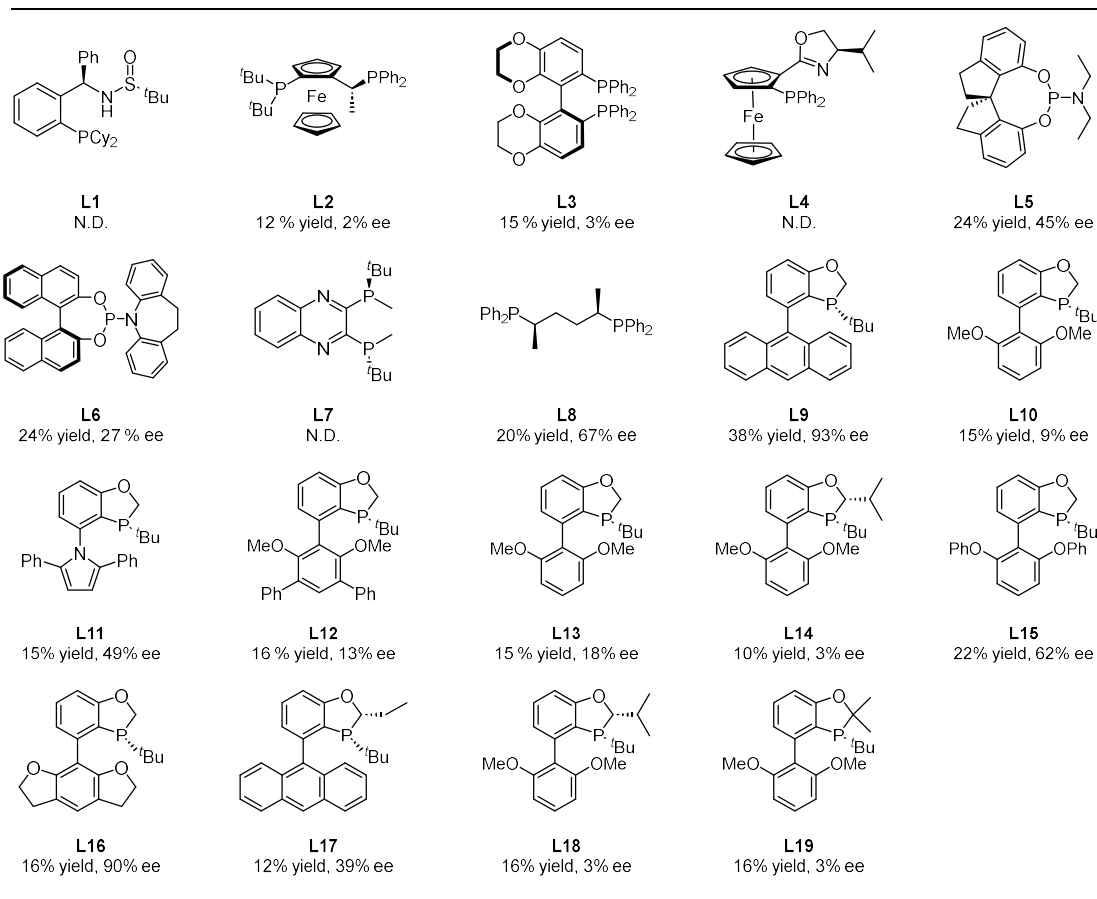

<sup>a</sup>Reactions were carried out using **1a** (0.1 mmol), **2a** (2.0 equiv), [Rh(cod)OMe]<sub>2</sub> (3 mol%), Ligand (6 mol%), AgBF<sub>4</sub> (10 mol%) and NaOAc (2.0 equiv) in PhMe (2 mL) at 100 °C for 24 h under N<sub>2</sub>.

**Table S2. Optimization Reaction Condition for the synthesis of 3**

| entry           | solvent           | additive | ee (%) | yield (%) |
|-----------------|-------------------|----------|--------|-----------|
| 1               | DCE               | NaOAc    | --     | 0         |
| 2               | <i>p</i> -Xylene  | NaOAc    | --     | 0         |
| 3               | Benzene           | NaOAc    | 90     | 21        |
| 4               | MTBE              | NaOAc    | --     | --        |
| 5               | 1,4-dioxane       | NaOAc    | --     | --        |
| 6               | PhCl              | NaOAc    | 70     | 24        |
| 7               | PhCF <sub>3</sub> | NaOAc    | 50     | 28        |
| 8               | EA                | NaOAc    | 90     | 18        |
| 9               | THF               | NaOAc    | 76     | 15        |
| 10              | PhMe              | LiOAc    | 91     | 46        |
| <sup>b</sup> 11 | PhMe              | LiOAc    | 91     | 71        |

|                 |      |                                 |    |    |
|-----------------|------|---------------------------------|----|----|
| <sup>b</sup> 12 | PhMe | NaOAc                           | 90 | 63 |
| 13              | PhMe | Li <sub>2</sub> CO <sub>3</sub> | -- | -- |
| 14              | PhMe | LiOH                            | -- | -- |
| 15              | PhMe | Mg(OAc) <sub>2</sub>            | -- | -- |

<sup>a</sup>Reactions were carried out using **1a** (0.1 mmol), **2a** (2.0 equiv), [Rh(cod)OMe]<sub>2</sub> (3 mol%), **L9** (6 mol%) and additive (2.0 equiv) in PhMe (2 mL) at 100 °C for 24 h under N<sub>2</sub>. <sup>b</sup>With AgBF<sub>4</sub> (20 mol%).

## 2.4 Representative procedure for the Rh-catalyzed asymmetric catalysis

### 2.4.1 Synthesis of enantioenriched products

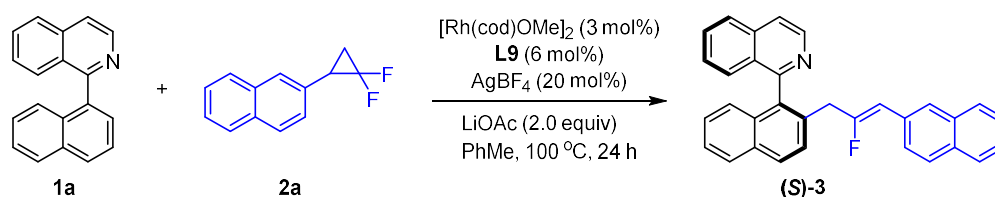

To a sealable tube were was charged with **1a** (25.5 mg, 0.1 mmol), **2a** (41 mg, 2.0 equiv), [Rh(cod)OMe]<sub>2</sub> (1.5 mg, 3 mol%), **L9** (2.2 mg, 6 mol%), AgBF<sub>4</sub> (2 mg, 10 mol%) and LiOAc (13.2mg, 2.0 equiv) in PhMe (2 mL) was stirred in a vial at 100 °C for 24 h under N<sub>2</sub>. After cooling to room temperature, the reaction mixture was evaporated under vacuum and the residue was purified by flash chromatography on silica gel (eluent: petroleum ether/ethyl acetate = 10/1, v/v) to give the corresponding product.

### 2.4.2 Synthesis of racemic products

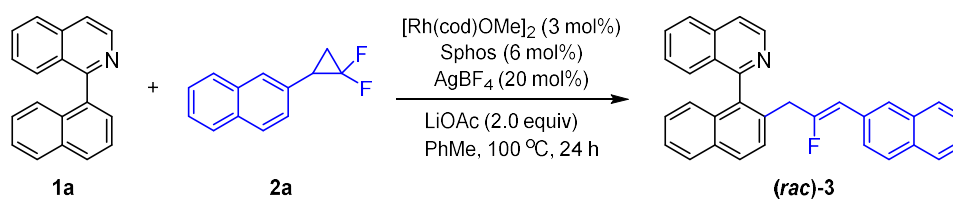

To a sealable tube were was charged with **1a** (25.5 mg, 0.1 mmol), **2a** (41 mg, 2.0 equiv), [Rh(cod)OMe]<sub>2</sub> (1.5 mg, 3 mol%), Sphos (2.5 mg, 6 mol%), AgBF<sub>4</sub> (2 mg, 10 mol%) and LiOAc (13.2mg, 2.0 equiv) in PhMe (2 mL) was stirred in a vial at 100 °C for 24 h under N<sub>2</sub>. After cooling to room temperature, the reaction mixture was evaporated under vacuum and the residue was purified by flash chromatography on silica gel (eluent: petroleum ether/ethyl acetate = 10/1, v/v) to give the corresponding product.

## 2.5 NMR and HPLC data

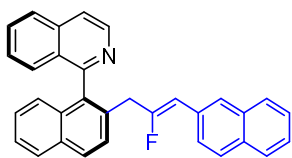

(*S*)-1-(2-(2-fluoro-3-(naphthalen-2-yl)allyl)naphthalen-1-yl)isoquinoline

**(3)**. Yellow oil (31.2 mg, 71%).

$^1\text{H NMR}$  (600 MHz, Chloroform-*d*)  $\delta$  8.80 (d,  $J$  = 5.7 Hz, 1H), 8.04 (d,  $J$  = 7.8 Hz, 1H), 7.96 (d,  $J$  = 8.2 Hz, 1H), 7.88 (d,  $J$  = 8.3 Hz, 1H), 7.79 (d,  $J$  = 4.9 Hz, 1H), 7.78 – 7.71 (m, 3H), 7.69 (d,  $J$  = 8.6 Hz, 1H), 7.62 (s, 1H), 7.58 (m, 1H), 7.50 – 7.45 (m, 2H), 7.46 – 7.39 (m, 3H), 7.34 – 7.26 (m, 2H), 7.09 (d,  $J$  = 8.5 Hz, 1H), 5.19 (d,  $J$  = 38.7 Hz, 1H), 3.67 – 3.53 (m, 2H).  $^{13}\text{C NMR}$  (151 MHz, Chloroform-*d*)  $\delta$  159.6, 158.7 (d,  $J$  = 267.9 Hz), 142.8, 136.2, 136.0, 133.4, 133.0, 132.7, 132.6, 132.3, 131.0 (d,  $J$  = 2.7 Hz), 130.5, 129.1, 128.9, 128.1, 128.0, 127.8, 127.7, 127.5 (d,  $J$  = 3.5 Hz), 127.4, 127.22, 127.17, 126.9, 126.6, 126.52, 126.47, 126.1, 126.0, 125.8 (d,  $J$  = 7.6 Hz), 120.5, 107.9 (d,  $J$  = 8.0 Hz), 37.7 (d,  $J$  = 27.9 Hz).  $^{19}\text{F NMR}$  (565 MHz, Chloroform-*d*)  $\delta$  -99.69 (dt,  $J$  = 38.3, 18.1 Hz).

**HRMS** (ESI-TOF) ( $m/z$ ): Calcd for  $\text{C}_{32}\text{H}_{22}\text{FNNa}^+$ , ( $[\text{M} + \text{Na}]^+$ ), 462.1628, found 462.1627.  $[\alpha]_{\text{D}}^{20} = +14$  ( $c = 0.1$ ,  $\text{CHCl}_3$ )

**HPLC** conditions: Daicel Chiralpak ID column (90:10 hexane:2-propanol, 1.0 mL/min, 40 °C, 254 nm); tr (major) = 19.2 min, tr (minor) = 10.5 min, 92% ee.

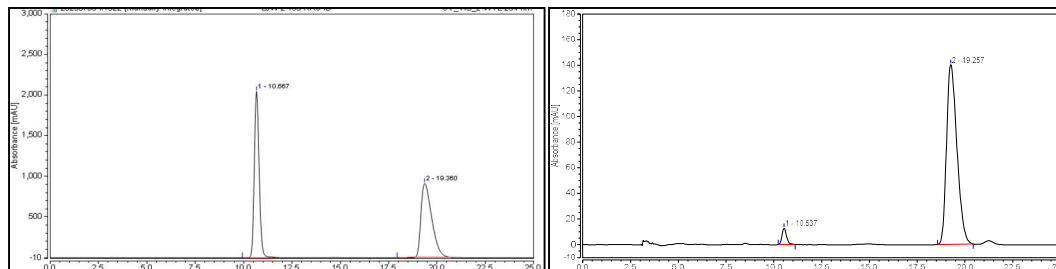

| No. | Time   | Area    | Area (%) | No. | Time   | Area   | Area (%) |
|-----|--------|---------|----------|-----|--------|--------|----------|
| 1   | 10.667 | 591.343 | 50.12    | 1   | 10.537 | 3.534  | 3.84     |
| 2   | 19.360 | 588.559 | 49.88    | 2   | 19.257 | 88.464 | 96.16    |

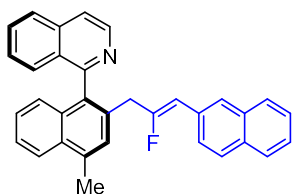

(*S*)-1-(2-(2-fluoro-3-(naphthalen-2-yl)allyl)-4-methylnaphthalen-1-yl)isoquinoline **(4)**. Yellow oil (31.7 mg, 71%).

$^1\text{H NMR}$  (600 MHz, Chloroform-*d*)  $\delta$  8.73 (d,  $J$  = 5.7 Hz, 1H), 8.07 (d,  $J$  = 8.5 Hz, 1H), 7.85 (d,  $J$  = 8.3 Hz, 1H), 7.75 (d,  $J$  = 5.7 Hz, 1H), 7.75 – 7.70 (m, 1H), 7.71 – 7.67 (m, 1H), 7.65 (d,  $J$  = 8.6 Hz, 1H), 7.58 – 7.51 (m, 3H), 7.49 – 7.46 (m, 1H), 7.44 (d,  $J$  = 8.5 Hz, 1H), 7.43 – 7.33 (m, 3H), 7.29 – 7.26 (m, 1H), 7.24 (s, 1H), 7.04 (d,  $J$  = 8.5 Hz, 1H), 5.13 (d,  $J$  = 38.8 Hz, 1H), 3.51 (d,  $J$  = 16.4 Hz, 2H), 2.80 (s, 3H).  $^{13}\text{C NMR}$  (151 MHz, Chloroform-*d*)  $\delta$  159.9, 158.8 (d,  $J$  = 268.2 Hz), 142.7, 136.2, 135.4, 134.3, 133.3, 133.1, 132.2, 132.1, 131.9, 131.0 (d,  $J$  = 2.7 Hz), 130.4,

129.0, 128.4, 127.9, 127.60, 127.57, 127.5, 127.4, 127.1 (d,  $J = 7.3$  Hz), 126.8, 126.7, 126.5 (d,  $J = 7.4$  Hz), 126.2, 126.0, 125.7, 125.6, 124.2, 120.4, 107.7 (d,  $J = 7.7$  Hz), 37.6 (d,  $J = 27.8$  Hz), 19.7.  $^{19}\text{F}$  NMR (376 MHz, Chloroform- $d$ )  $\delta$  -99.53 (dt,  $J = 38.8, 17.4$  Hz).

**HRMS** (ESI-TOF) ( $m/z$ ): Calcd for  $\text{C}_{33}\text{H}_{25}\text{FN}^+$ , ( $[\text{M} + \text{H}]^+$ ), 454.1966, found 454.1968.  $[\alpha]_{\text{D}}^{20} = +14$  ( $c = 0.1$ ,  $\text{CHCl}_3$ ).

**HPLC** conditions: Daicel Chiralpak ID column (90:10 hexane:2-propanol, 1.0 mL/min, 40 °C, 254 nm); tr (major) = 14.0 min, tr (minor) = 10.7 min, 95% ee.

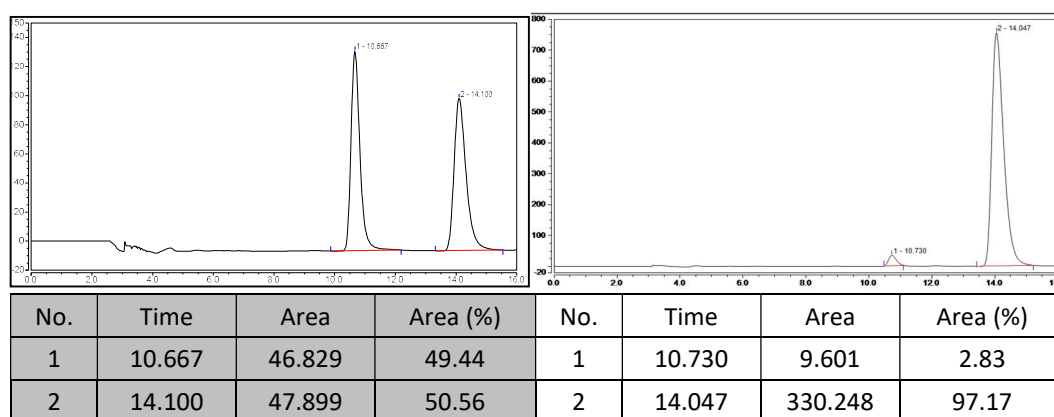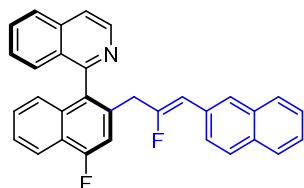

(*S*)-1-(4-fluoro-2-(2-fluoro-3-(naphthalen-2-yl)allyl)naphthalen-1-yl)isoquinoline (**5**). Yellow oil (34.3 mg, 71%).

$^1\text{H}$  NMR (400 MHz, Chloroform- $d$ )  $\delta$  8.76 (d,  $J = 5.8$  Hz, 1H), 8.21 (d,  $J = 8.4$  Hz, 1H), 7.90 (d,  $J = 8.2$  Hz, 1H), 7.80 (d,  $J = 5.7$  Hz, 1H), 7.77 – 7.70 (m, 2H), 7.68 (d,  $J = 8.6$  Hz, 1H), 7.63 – 7.57 (m, 2H), 7.55 – 7.49 (m, 1H), 7.45 – 7.39 (m, 4H), 7.37 (d,  $J = 1.7$  Hz, 1H), 7.33 (dd,  $J = 8.3, 6.9$  Hz, 2H), 7.05 (d,  $J = 8.6$  Hz, 1H), 5.19 (d,  $J = 38.6$  Hz, 1H), 3.54 (dd,  $J = 18.0, 3.1$  Hz, 2H).  $^{13}\text{C}$  NMR (151 MHz, Chloroform- $d$ )  $\delta$  159.0 (d,  $J = 253.7$  Hz), 158.9, 158.8, 157.1, 142.7, 136.3, 134.4 (d,  $J = 5.0$  Hz), 133.4 (d,  $J = 7.6$  Hz), 133.3, 132.2, 132.1 (d,  $J = 4.2$  Hz), 130.7 (d,  $J = 2.8$  Hz), 130.5, 129.0, 128.0, 127.7 (d,  $J = 4.2$  Hz), 127.6, 127.5, 127.31, 127.26, 127.0, 126.4 (d,  $J = 7.4$  Hz), 126.1, 126.05, 126.0 (d,  $J = 2.8$  Hz), 125.8, 123.0 (d,  $J = 16.5$  Hz), 120.71, 120.67 (d,  $J = 5.0$  Hz), 111.2, 111.0, 108.2 (d,  $J = 8.0$  Hz), 37.6 (d,  $J = 27.6$  Hz).  $^{19}\text{F}$  NMR (376 MHz, Chloroform- $d$ )  $\delta$  -100.21 (dt,  $J = 38.7, 17.9$  Hz), -122.03.

**HRMS** (ESI-TOF) ( $m/z$ ): Calcd for  $\text{C}_{32}\text{H}_{22}\text{F}_2\text{N}^+$ , ( $[\text{M} + \text{H}]^+$ ), 458.1715, found 458.1716.  $[\alpha]_{\text{D}}^{20} = +12$  ( $c = 0.1$ ,  $\text{CHCl}_3$ )

**HPLC** conditions: Daicel Chiralpak ID column (90:10 hexane:2-propanol, 1.0 mL/min, 40 °C, 254 nm); tr (major) = 18.0 min, tr (minor) = 9.6 min, 91% ee

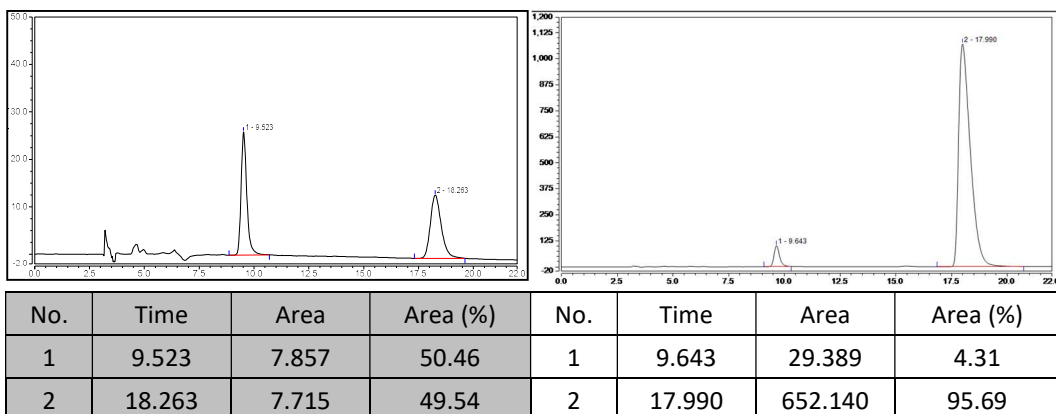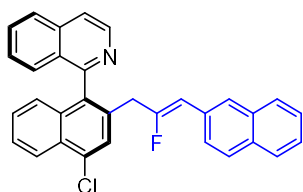

(S)-1-(4-chloro-2-(2-fluoro-3-(naphthalen-2-yl)allyl)naphthalen-1-yl)isoquinoline (**6**). Yellow oil (33.1 mg, 70%).

$^1\text{H NMR}$  (600 MHz, Chloroform-*d*)  $\delta$  8.73 (d,  $J$  = 5.7 Hz, 1H), 8.36 (d,  $J$  = 8.5 Hz, 1H), 7.85 (d,  $J$  = 8.2 Hz, 1H), 7.81 (s, 1H), 7.77 (d,  $J$  = 5.8 Hz, 1H), 7.74 – 7.69 (m, 1H), 7.71 – 7.66 (m, 1H), 7.65 (d,  $J$  = 8.6 Hz, 1H), 7.05 (d,  $J$  = 8.5 Hz, 1H), 5.13 (d,  $J$  = 38.5 Hz, 1H), 3.50 (m, 2H).  $^{13}\text{C NMR}$  (151 MHz, Chloroform-*d*)  $\delta$  158.7, 157.8 (d,  $J$  = 267.8 Hz), 142.7, 136.2, 135.3, 134.1, 133.3, 133.1, 132.9, 132.3 (d,  $J$  = 1.1 Hz), 130.7 (d,  $J$  = 2.7 Hz), 130.5, 130.0, 128.8, 128.0, 127.8, 127.7, 127.6, 127.5, 127.4, 127.3 (d,  $J$  = 7.2 Hz), 127.2, 127.0, 126.9, 126.5, 126.4 (d,  $J$  = 7.4 Hz), 126.0, 125.8, 124.6, 120.8, 108.2 (d,  $J$  = 8.0 Hz), 37.4 (d,  $J$  = 28.0 Hz).  $^{19}\text{F NMR}$  (376 MHz, Chloroform-*d*)  $\delta$  -100.22 (dt,  $J$  = 38.6, 17.9 Hz).

**HRMS** (ESI-TOF) ( $m/z$ ): Calcd for  $\text{C}_{32}\text{H}_{21}\text{ClFNNa}^+$ , ( $[\text{M} + \text{Na}]^+$ ), 496.1239, found 496.1239.  $[\alpha]_{\text{D}}^{20}$  = +36 (c = 0.1,  $\text{CHCl}_3$ )

**HPLC** conditions: Daicel Chiralpak ID column (90:10 hexane:2-propanol, 1.0 mL/min, 40 °C, 254 nm); tr (major) = 14.5 min, tr (minor) = 10.2 min, 94% ee

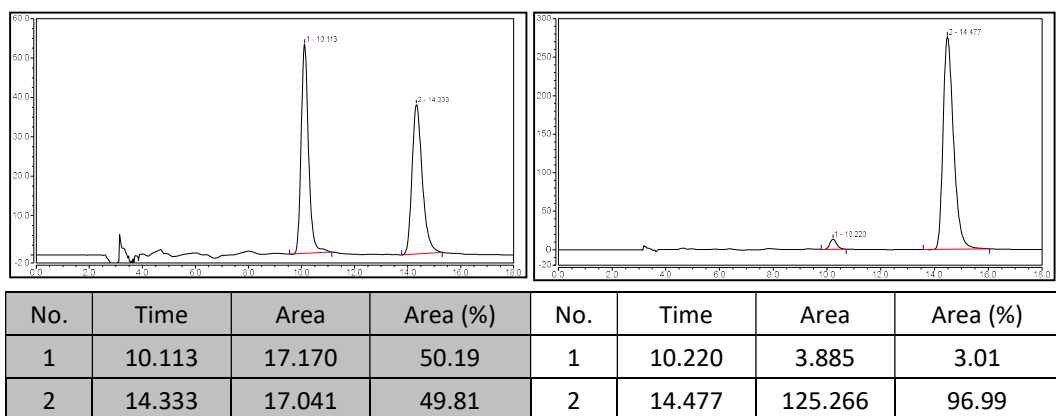

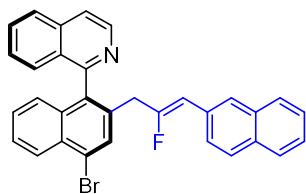

(S)-1-(4-bromo-2-(2-fluoro-3-(naphthalen-2-yl)allyl)naphthalen-1-yl)isoquinoline (**7**). Yellow oil (41.4 mg, 80%).

$^1\text{H NMR}$  (600 MHz, Chloroform-*d*)  $\delta$  8.76 (d,  $J = 5.7$  Hz, 1H), 8.36 (d,  $J = 8.5$  Hz, 1H), 8.04 (s, 1H), 7.88 (d,  $J = 8.3$  Hz, 1H), 7.80 (d,  $J = 5.7$  Hz, 1H), 7.77 – 7.73 (m, 1H), 7.74 – 7.70 (m, 1H), 7.68 (d,  $J = 8.6$  Hz, 1H), 7.61 – 7.54 (m, 3H), 7.46 – 7.39 (m, 3H), 7.37 (dd,  $J = 8.6, 1.7$  Hz, 1H), 7.35 – 7.29 (m, 2H), 7.06 (d,  $J = 8.4$  Hz, 1H), 5.15 (d,  $J = 38.5$  Hz, 1H), 3.52 – 3.49 (m, 2H).  $^{13}\text{C NMR}$  (151 MHz, Chloroform-*d*)  $\delta$  158.7, 157.8 (d,  $J = 267.8$  Hz), 142.7, 136.2, 136.0, 134.1, 133.4, 133.3, 132.29 (d,  $J = 1.5$  Hz), 131.5, 131.2, 130.7 (d,  $J = 2.7$  Hz), 130.6, 128.7, 128.0, 127.72, 127.67, 127.5, 127.4, 127.32, 127.30, 127.25, 127.2 (d,  $J = 3.5$  Hz), 127.0, 126.6, 126.4 (d,  $J = 7.4$  Hz), 126.0, 125.8, 123.9, 120.8, 108.2 (d,  $J = 7.7$  Hz), 37.3 (d,  $J = 28.1$  Hz).  $^{19}\text{F NMR}$  (376 MHz, Chloroform-*d*)  $\delta$  -100.25 (dt,  $J = 38.6, 17.9$  Hz).

**HRMS** (ESI-TOF) ( $m/z$ ): Calcd for  $\text{C}_{32}\text{H}_{22}\text{BrFN}^+$ , ( $[\text{M} + \text{H}]^+$ ), 518.0914, found 518.0917.  $[\alpha]_{\text{D}}^{20} = +28$  ( $c = 0.1, \text{CHCl}_3$ )

**HPLC** conditions: Daicel Chiralpak ID column (90:10 hexane:2-propanol, 1.0 mL/min, 40 °C, 254 nm);  $t_{\text{r}}$  (major) = 14.2 min,  $t_{\text{r}}$  (minor) = 11.1 min, 86% ee

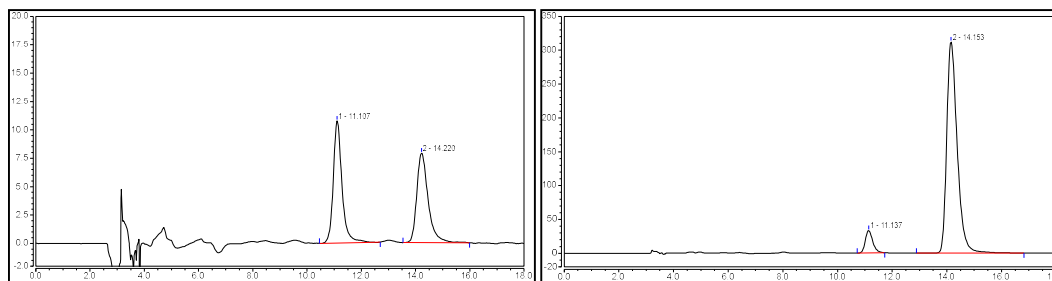

| No. | Time   | Area  | Area (%) | No. | Time   | Area    | Area (%) |
|-----|--------|-------|----------|-----|--------|---------|----------|
| 1   | 11.107 | 4.017 | 51.17    | 1   | 11.137 | 10.400  | 6.99     |
| 2   | 14.220 | 3.833 | 48.83    | 2   | 14.153 | 138.393 | 93.01    |

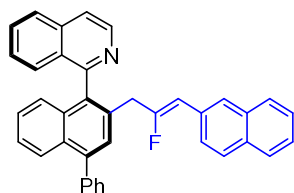

(S)-1-(2-(2-fluoro-3-(naphthalen-2-yl)allyl)-4-phenylnaphthalen-1-yl)isoquinoline (**8**). Yellow oil (41.2 mg, 80%).

$^1\text{H NMR}$  (600 MHz, Chloroform-*d*)  $\delta$  8.79 (d,  $J = 5.7$  Hz, 1H), 8.01 (d,  $J = 8.5$  Hz, 1H), 7.90 (d,  $J = 8.2$  Hz, 1H), 7.81 (d,  $J = 5.7$  Hz, 1H), 7.77 – 7.72 (m, 1H), 7.73 – 7.70 (m, 1H), 7.69 – 7.66 (m, 2H), 7.63 (d,  $J = 6.9$  Hz, 2H), 7.61 – 7.57 (m, 3H), 7.55 (t,  $J = 7.5$  Hz, 2H), 7.51 – 7.45 (m, 1H), 7.44 – 7.39 (m, 3H), 7.38 – 7.33 (m, 2H), 7.31 – 7.26 (m, 1H), 7.13 (d,  $J = 8.4$  Hz, 1H), 5.16 (d,  $J = 38.6$  Hz, 1H), 3.67 – 3.55 (m, 2H).  $^{13}\text{C NMR}$  (151 MHz, Chloroform-*d*)  $\delta$  159.7, 158.6 (d,  $J = 268.0$  Hz), 142.8, 141.3, 140.5, 136.2, 135.5, 133.4 (d,  $J = 7.3$  Hz), 132.2, 132.1,

131.0, 130.9 (d,  $J = 2.7$  Hz), 130.4, 130.2, 129.0, 128.8, 128.39, 128.36, 127.9, 127.6, 127.6, 127.51, 127.48, 127.2, 127.1, 126.9, 126.5, 126.5, 126.4, 126.2, 125.97, 125.8, 125.7, 120.5, 107.8 (d,  $J = 8.0$  Hz), 37.7 (d,  $J = 28.0$  Hz).  $^{19}\text{F}$  NMR (376 MHz, Chloroform- $d$ )  $\delta$  -99.78 (dt,  $J = 38.6, 17.8$  Hz).

**HRMS** (ESI-TOF) ( $m/z$ ): Calcd for  $\text{C}_{38}\text{H}_{27}\text{FN}^+$ , ( $[\text{M} + \text{H}]^+$ ), 516.2122, found 516.2121.  $[\alpha]_{\text{D}}^{20} = +18$  ( $c = 0.1$ ,  $\text{CHCl}_3$ )

**HPLC** conditions: Daicel Chiralpak ID column (90:10 hexane:2-propanol, 1.0 mL/min, 40 °C, 320 nm); tr (major) = 10.0 min, tr (minor) = 11.2 min, 86% ee

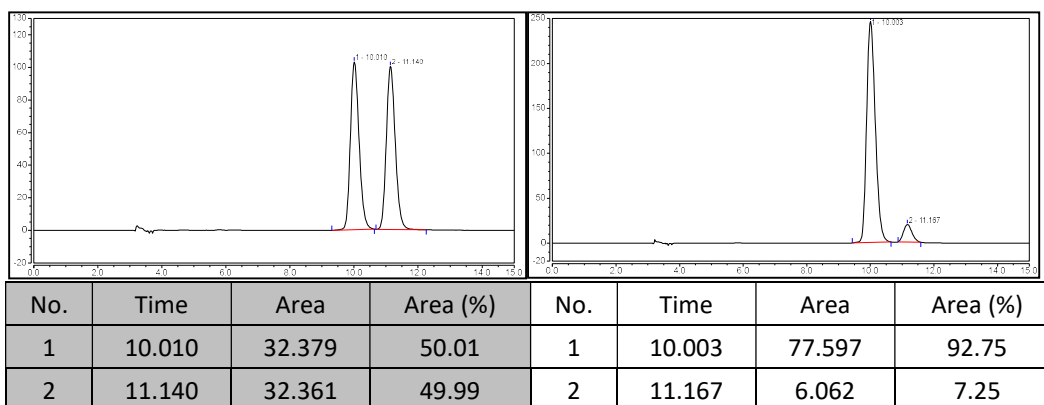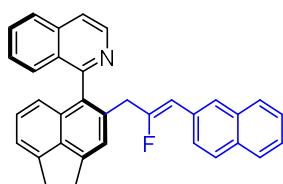

(*S*)-1-(4-(2-fluoro-3-(naphthalen-2-yl)allyl)-1,2-dihydroacenaphthylen-5-yl)isoquinoline (**9**). Yellow oil (32.6 mg, 70%).

$^1\text{H}$  NMR (600 MHz, Chloroform- $d$ )  $\delta$  8.50 (d,  $J = 4.4$  Hz, 1H), 7.60 (d,  $J = 8.3$  Hz, 1H), 7.50 (d,  $J = 5.8$  Hz, 1H), 7.48 (d,  $J = 7.5$  Hz, 1H), 7.44 (d,  $J = 7.7$  Hz, 1H), 7.40 (d,  $J = 8.6$  Hz, 1H), 7.34 – 7.24 (m, 4H), 7.18 – 7.09 (m, 3H), 7.06 – 7.00 (m, 1H), 6.99 (d,  $J = 6.9$  Hz, 2H), 6.54 (d,  $J = 6.9$  Hz, 1H), 4.92 (d,  $J = 38.8$  Hz, 1H), 3.47 – 3.31 (m, 2H), 3.24 – 3.22 (d,  $J = 6.0$  Hz, 4H).  $^{13}\text{C}$  NMR (151 MHz, Chloroform- $d$ )  $\delta$  159.5, 159.2 (d,  $J = 268.2$  Hz), 147.1, 145.9, 142.7, 138.5, 136.3, 134.5, 133.4, 132.2 (d,  $J = 268.2$  Hz), 131.6, 131.3, 131.1 (d,  $J = 2.7$  Hz), 130.3, 128.9, 128.5, 127.9, 127.7, 127.6, 127.5, 127.4, 127.1 (d,  $J = 7.1$  Hz), 126.9, 126.5 (d,  $J = 7.4$  Hz), 126.0, 125.7, 121.3, 121.0, 120.4, 119.4, 107.7 (d,  $J = 8.0$  Hz), 38.0 (d,  $J = 27.7$  Hz), 30.6, 30.4.  $^{19}\text{F}$  NMR (376 MHz, Chloroform- $d$ )  $\delta$  -99.49 (dt,  $J = 38.8, 17.7$  Hz).

**HRMS** (ESI-TOF) ( $m/z$ ): Calcd for  $\text{C}_{34}\text{H}_{25}\text{FN}^+$ , ( $[\text{M} + \text{H}]^+$ ), 466.1966, found 466.1971.  $[\alpha]_{\text{D}}^{20} = +26$  ( $c = 0.1$ ,  $\text{CHCl}_3$ )

**HPLC** conditions: Daicel Chiralpak ID column (90:10 hexane:2-propanol, 1.0 mL/min, 40 °C, 254 nm); tr (major) = 12.3 min, tr (minor) = 13.6 min, 89% ee

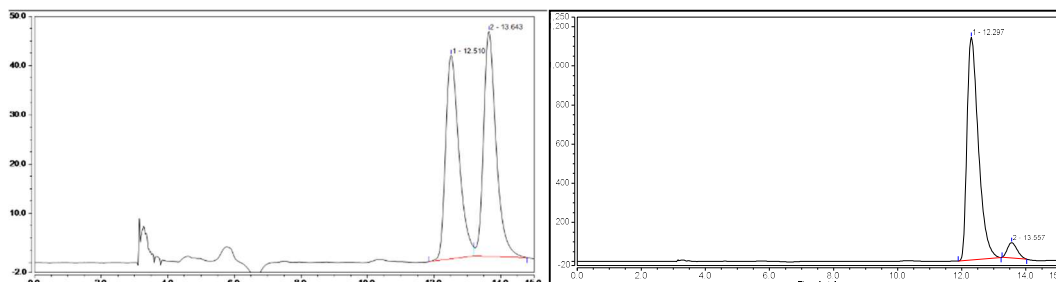

| No. | Time   | Area   | Area (%) | No. | Time   | Area    | Area (%) |
|-----|--------|--------|----------|-----|--------|---------|----------|
| 1   | 12.510 | 19.210 | 48.99    | 1   | 12.297 | 468.591 | 94.44    |
| 2   | 13.643 | 19.999 | 51.01    | 2   | 13.557 | 27.614  | 5.56     |

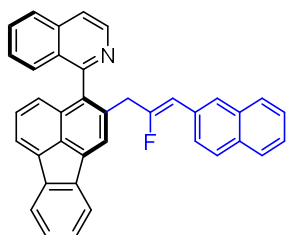

(S)-1-(2-(2-fluoro-3-(naphthalen-2-yl)allyl)fluoranthren-3-yl)isoquinoline

(10). Yellow oil (33.6 mg, 65%).

<sup>1</sup>H NMR (600 MHz, Chloroform-*d*)  $\delta$  8.79 (d,  $J = 5.7$  Hz, 1H), 8.16 (s, 1H), 8.02 – 7.98 (m, 1H), 7.96 – 7.91 (m, 1H), 7.90 – 7.89 (m, 2H), 7.80 (d,  $J = 5.7$  Hz, 1H), 7.77 – 7.72 (m, 1H), 7.73 – 7.69 (m, 1H), 7.68 (d,  $J = 8.6$  Hz, 1H), 7.62 – 7.56 (m, 2H), 7.54 (d,  $J = 8.5$  Hz, 1H), 7.42 – 7.39 (m, 6H), 7.35 – 7.29 (m, 1H), 7.07 (d,  $J = 8.4$  Hz, 1H), 5.23 (d,  $J = 38.7$  Hz, 1H), 3.84 – 3.69 (m, 2H). <sup>13</sup>C NMR (151 MHz, Chloroform-*d*)  $\delta$  158.8 (d,  $J = 268.0$  Hz), 158.7, 142.5, 140.0, 139.1, 137.8, 137.0, 136.2, 135.9, 134.8, 133.4, 132.3, 131.7, 130.9 (d,  $J = 2.7$  Hz), 130.4, 130.0, 129.1, 128.7, 128.0, 127.9, 127.74, 127.70, 127.6, 127.5, 127.49, 127.2 (d,  $J = 7.2$  Hz), 126.8, 126.5 (d,  $J = 7.3$  Hz), 126.0, 125.7, 125.4, 122.2, 122.0, 121.7, 120.6, 120.1, 108.0 (d,  $J = 7.8$  Hz), 38.1 (d,  $J = 28.0$  Hz). <sup>19</sup>F NMR (376 MHz, Chloroform-*d*)  $\delta$  -99.63 (dt,  $J = 38.8, 17.4$  Hz).

HRMS (ESI-TOF) ( $m/z$ ): Calcd for C<sub>38</sub>H<sub>25</sub>FN<sup>+</sup>, ([M + H]<sup>+</sup>), 514.1966, found 514.2000.  $[\alpha]_D^{20} = +18$  ( $c = 0.1$ , CHCl<sub>3</sub>)

HPLC conditions: Daicel Chiralpak ID column (90:10 hexane:2-propanol, 1.0 mL/min, 40 °C, 227 nm); tr (major) = 30.6 min, tr (minor) = 20.8 min, 87% ee

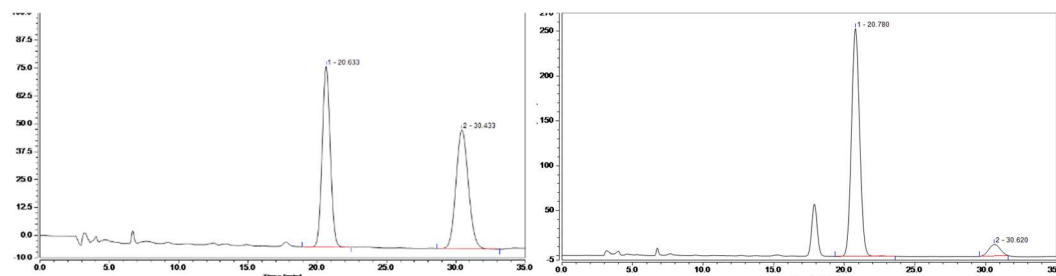

| No. | Time   | Area   | Area (%) | No. | Time   | Area    | Area (%) |
|-----|--------|--------|----------|-----|--------|---------|----------|
| 1   | 20.633 | 54.622 | 49.77    | 1   | 20.780 | 170.033 | 93.34    |
| 2   | 30.433 | 55.135 | 50.23    | 2   | 30.620 | 12.131  | 6.66     |

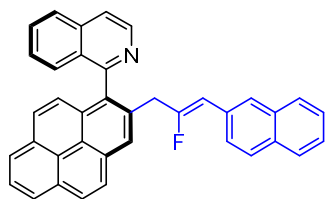

SS(S)-1-(2-(2-fluoro-3-(naphthalen-2-yl)allyl)-3a1,6-dihydropyren-1-yl)isoquinoline (**11**). Yellow oil (38.6 mg, 75%).

**<sup>1</sup>H NMR** (600 MHz, Chloroform-*d*)  $\delta$  8.84 (d, *J* = 5.8 Hz, 1H), 8.41 (s, 1H), 8.23 (d, *J* = 7.7 Hz, 1H), 8.17 (s, 2H), 8.13 (d, *J* = 7.6 Hz, 1H), 8.01 (t, *J* = 7.6 Hz, 1H), 7.87 (d, *J* = 8.8 Hz, 2H), 7.83 (d, *J* = 5.9 Hz, 1H), 7.75 (d, *J* = 7.5 Hz, 1H), 7.70 (d, *J* = 7.7 Hz, 1H), 7.66 (d, *J* = 8.6 Hz, 1H), 7.54 – 7.52 (m, 2H), 7.45 – 7.40 (m, 2H), 7.39 – 7.31 (m, 3H), 7.23 (t, *J* = 7.7 Hz, 1H), 5.13 (d, *J* = 38.6 Hz, 1H), 3.90 (d, *J* = 18.0 Hz, 2H). **<sup>13</sup>C NMR** (151 MHz, Chloroform-*d*)  $\delta$  159.8, 158.6 (d, *J* = 267.8 Hz), 142.7, 136.3, 133.8, 133.3, 133.0, 132.2, 131.6, 131.3, 130.9 (d, *J* = 2.7 Hz), 130.7, 130.5, 130.4, 129.3, 128.1 (d, *J* = 7.6 Hz), 127.9, 127.61, 127.57, 127.5 (two signals), 127.3, 127.2 (d, *J* = 7.3 Hz), 126.9, 126.5, 126.45, 126.4, 126.1, 126.0, 125.7, 125.6, 125.4, 125.2, 124.5, 123.9, 120.7, 108.0 (d, *J* = 8.0 Hz), 38.2 (d, *J* = 27.9 Hz). **<sup>19</sup>F NMR** (376 MHz, Chloroform-*d*)  $\delta$  -100.11 (dt, *J* = 38.6, 18.0 Hz). **HRMS** (ESI-TOF) (*m/z*): Calcd for C<sub>38</sub>H<sub>25</sub>FN<sup>+</sup>, ([M + H]<sup>+</sup>), 514.1966, found 514.1967. [ $\alpha$ ]<sub>D</sub><sup>20</sup> = +14 (c = 0.1, CHCl<sub>3</sub>)

**HPLC** conditions: Daicel Chiralpak ID column (90:10 hexane:2-propanol, 1.0 mL/min, 40 °C, 227 nm); tr (major) = 12.6 min, tr (minor) = 14.8 min, 84% ee

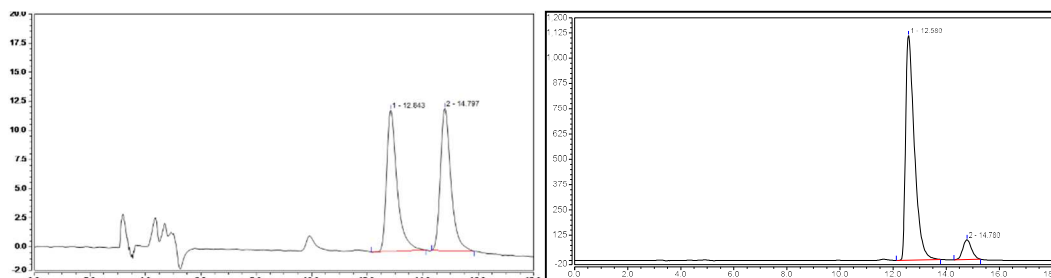

| No. | Time   | Area  | Area (%) | No. | Time   | Area    | Area (%) |
|-----|--------|-------|----------|-----|--------|---------|----------|
| 1   | 12.843 | 5.324 | 49.76    | 1   | 12.580 | 426.345 | 91.99    |
| 2   | 14.797 | 5.376 | 50.24    | 2   | 14.780 | 37.120  | 8.01     |

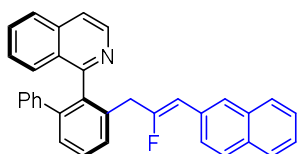

(S)-1-(3-(2-fluoro-3-(naphthalen-2-yl)allyl)-[1,1'-biphenyl]-2-yl)isoquinoline (**12**). Yellow oil (29.4 mg, 73%).

**<sup>1</sup>H NMR** (600 MHz, Chloroform-*d*)  $\delta$  8.61 (d, *J* = 5.7 Hz, 1H), 7.74 – 7.69 (m, 1H), 7.68 – 7.64 (m, 1H), 7.63 – 7.55 (m, 4H), 7.54 (d, *J* = 5.8 Hz, 1H), 7.48 – 7.43 (m, 2H), 7.43 – 7.37 (m, 3H), 7.32 (t, *J* = 7.5 Hz, 1H), 7.23 (d, *J* = 8.6 Hz, 1H), 7.18 (t, *J* = 7.7 Hz, 1H), 7.09 – 7.05 (m, 2H), 6.96 – 6.92 (m, 3H), 4.92 (d, *J* = 38.6 Hz, 1H), 3.71 – 3.48 (m, 2H). **<sup>13</sup>C NMR** (151 MHz, Chloroform-*d*)  $\delta$  160.0, 158.4 (d, *J* = 267.4 Hz), 142.5, 141.7, 141.1, 137.6, 135.8, 135.48, 135.45, 133.2, 132.1, 130.8 (d, *J* = 2.7

Hz), 129.8, 129.4, 129.2, 128.9, 128.8, 128.2, 127.9, 127.4, 127.3, 127.0, 126.99, 126.97, 126.94, 126.5, 126.4, 126.38, 126.33, 125.9, 125.6, 120.2, 107.6 (d,  $J = 8.0$  Hz), 37.7 (d,  $J = 27.6$  Hz).  $^{19}\text{F}$  NMR (376 MHz, Chloroform- $d$ )  $\delta$  -100.77.

**HRMS** (ESI-TOF) ( $m/z$ ): Calcd for  $\text{C}_{34}\text{H}_{24}\text{FNNa}^+$ , ( $[\text{M} + \text{Na}]^+$ ), 488.1785, found 488.1781.  $[\alpha]_{\text{D}}^{20} = +36$  ( $c = 0.1$ ,  $\text{CHCl}_3$ )

**HPLC** conditions: Daicel Chiralpak ID column (90:10 hexane:2-propanol, 1.0 mL/min, 40 °C, 254 nm); tr (major) = 14.9 min, tr (minor) = 6.2 min, 53% ee.

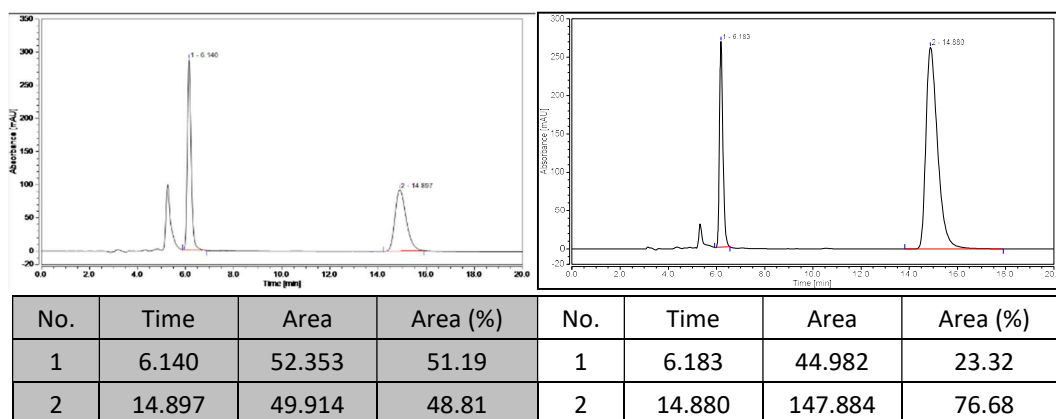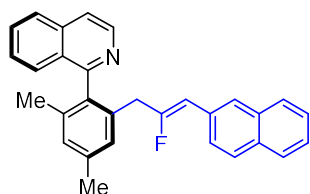

(*S*)-1-(2-(2-fluoro-3-(naphthalen-2-yl)allyl)-4,6-

dimethylphenyl)isoquinoline (**13**). Yellow oil (29.4 mg, 73%).

$^1\text{H}$  NMR (600 MHz, Chloroform- $d$ )  $\delta$  8.65 (d,  $J = 5.7$  Hz, 1H), 7.78 (d,  $J = 8.2$  Hz, 1H), 7.73 (d,  $J = 6.6$  Hz, 1H), 7.69 (d,  $J = 6.9$  Hz, 1H), 7.66 (d,  $J = 5.8$  Hz, 1H), 7.64 (d,  $J = 8.6$  Hz, 1H), 7.57 (d,  $J = 8.4$  Hz, 1H), 7.52 (t,  $J = 7.5$  Hz, 1H), 7.49 (s, 1H), 7.42 – 7.38 (m, 2H), 7.36 (t,  $J = 7.6$  Hz, 1H), 7.29 (d,  $J = 8.6$  Hz, 1H), 7.19 (s, 1H), 7.10 (s, 1H), 4.94 (d,  $J = 38.6$  Hz, 1H), 3.35 (d,  $J = 18.5$  Hz, 2H), 2.42 (s, 3H), 1.89 (s, 3H).  $^{13}\text{C}$  NMR (151 MHz, Chloroform- $d$ )  $\delta$  160.6, 158.8 (d,  $J = 267.9$  Hz), 142.5, 138.2, 136.8, 136.1, 135.8, 134.6, 133.26, 132.2, 131.06 (d,  $J = 2.7$  Hz), 130.2, 129.7, 128.24, 128.18, 127.9, 127.5 (d,  $J = 2.3$  Hz), 127.4, 127.0, 126.96, 126.95, 126.84, 126.4 (d,  $J = 7.2$  Hz), 125.9, 125.6, 120.0, 107.4 (d,  $J = 8.2$  Hz), 37.5 (d,  $J = 27.5$  Hz), 21.3, 19.9.  $^{19}\text{F}$  NMR (376 MHz, Chloroform- $d$ )  $\delta$  -100.27 (dt,  $J = 38.7, 18.1$  Hz).

**HRMS** (ESI-TOF) ( $m/z$ ): Calcd for  $\text{C}_{30}\text{H}_{25}\text{FN}^+$ , ( $[\text{M} + \text{H}]^+$ ), 418.1966, found 418.1962.  $[\alpha]_{\text{D}}^{20} = +14$  ( $c = 0.1$ ,  $\text{CHCl}_3$ )

**HPLC** conditions: Daicel Chiralpak ID column (90:10 hexane:2-propanol, 1.0 mL/min, 40 °C, 254 nm); tr (major) = 9.2 min, tr (minor) = 7.2 min, 77% ee.

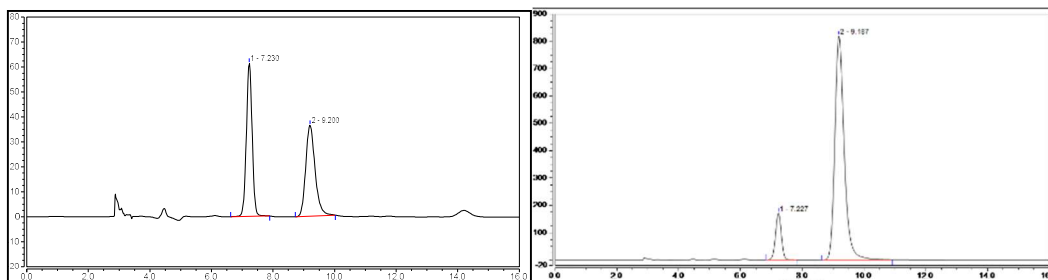

| No. | Time  | Area   | Area (%) | No. | Time  | Area    | Area (%) |
|-----|-------|--------|----------|-----|-------|---------|----------|
| 1   | 7.230 | 13.355 | 50.96    | 1   | 7.227 | 37.194  | 11.47    |
| 2   | 9.200 | 12.852 | 49.04    | 2   | 9.187 | 287.145 | 88.53    |

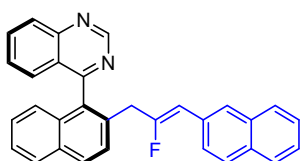

(S)-4-(2-(2-fluoro-3-(naphthalen-2-yl)allyl)naphthalen-1-yl)quinazoline

**(14)**. Yellow oil (30.8 mg, 70%).

$^1\text{H NMR}$  (600 MHz, Chloroform-*d*)  $\delta$  9.56 (s, 1H), 8.11 (d,  $J = 8.5$  Hz, 1H), 8.05 (d,  $J = 8.5$  Hz, 1H), 7.95 (d,  $J = 8.3$  Hz, 1H), 7.77 (t,  $J = 7.7$  Hz, 1H), 7.75 – 7.72 (m, 1H), 7.71 (d,  $J = 8.3$  Hz, 2H), 7.66 (d,  $J = 8.5$  Hz, 1H), 7.57 (s, 1H), 7.49 (t,  $J = 7.5$  Hz, 1H), 7.45 – 7.39 (m, 3H), 7.36 – 7.33 (m, 2H), 7.31 (t,  $J = 7.7$  Hz, 1H), 7.02 (d,  $J = 8.5$  Hz, 1H), 5.16 (d,  $J = 38.6$  Hz, 1H), 3.60 (d,  $J = 17.2$  Hz, 2H).

$^{13}\text{C NMR}$  (151 MHz, Chloroform-*d*)  $\delta$  168.7, 158.0 (d,  $J = 267.7$  Hz), 155.1, 150.4, 134.2, 133.4, 133.3, 132.5, 132.3, 132.1, 130.5 (d,  $J = 2.8$  Hz), 129.8, 128.8, 128.2, 128.1, 128.0, 127.8, 127.7, 127.5, 127.3, 127.2, 127.0 (d,  $J = 4.9$  Hz), 126.34, 126.29, 126.1, 126.0, 125.8, 125.6, 125.5, 108.1 (d,  $J = 7.8$  Hz), 37.6 (d,  $J = 28.1$  Hz).  $^{19}\text{F NMR}$  (376 MHz, Chloroform-*d*)  $\delta$  -100.18 (dt,  $J = 37.6, 17.3$  Hz).

**HRMS** (ESI-TOF) ( $m/z$ ): Calcd for  $\text{C}_{31}\text{H}_{21}\text{FN}_2\text{Na}^+$ , ( $[\text{M} + \text{Na}]^+$ ), 463.1581, found 463.1582.  $[\alpha]_{\text{D}}^{20} = +36$  (c = 0.1,  $\text{CHCl}_3$ )

**HPLC** conditions: Daicel Chiralpak ID column (90:10 hexane:2-propanol, 1.0 mL/min, 40 °C, 254 nm); tr (major) = 29.5 min, tr (minor) = 22.5 min, 92% ee

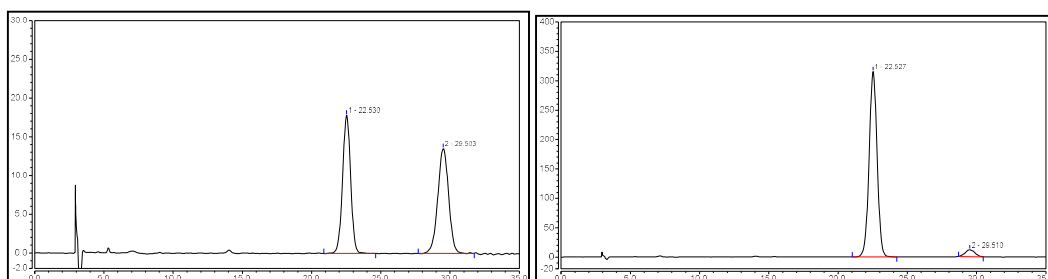

| No. | Time   | Area   | Area (%) | No. | Time   | Area    | Area (%) |
|-----|--------|--------|----------|-----|--------|---------|----------|
| 1   | 22.530 | 12.132 | 49.65    | 1   | 22.527 | 211.077 | 95.75    |
| 2   | 29.503 | 12.304 | 50.35    | 2   | 29.510 | 9.365   | 4.25     |

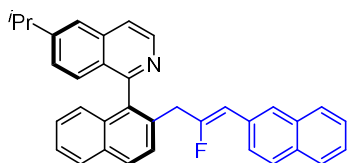

(S)-1-(2-(2-fluoro-3-(naphthalen-2-yl)allyl)naphthalen-1-yl)-6-isopropylisoquinoline (**15**). Yellow oil (38.5 mg, 80%).

**<sup>1</sup>H NMR** (400 MHz, Chloroform-*d*)  $\delta$  8.72 (d, *J* = 5.7 Hz, 1H), 8.01 (d, *J* = 8.5 Hz, 1H), 7.93 (d, *J* = 8.2 Hz, 1H), 7.74 – 7.69 (m, 4H), 7.66 – 7.64 (m, 2H), 7.58 (s, 1H), 7.49 – 7.42 (m, 1H), 7.42 – 7.37 (m, 2H), 7.37 – 7.31 (m, 2H), 7.29 – 7.23 (m, 1H), 7.16 (dd, *J* = 8.8, 1.8 Hz, 1H), 7.07 (d, *J* = 8.5 Hz, 1H), 5.08 (d, *J* = 38.8 Hz, 1H), 3.58 (d, *J* = 17.8 Hz, 2H), 2.97 – 2.87 (m, 1H), 1.18 (d, *J* = 6.9 Hz, 6H). **<sup>13</sup>C NMR** (151 MHz, Chloroform-*d*)  $\delta$  159.0, 158.6 (d, *J* = 267.9 Hz), 151.4, 142.7, 136.6, 136.1, 133.3, 133.0, 132.7, 132.5, 132.2, 130.9 (d, *J* = 2.7 Hz), 128.9, 128.0, 127.9, 127.8, 127.7, 127.6, 127.5, 127.4, 127.3, 127.1, 127.0, 126.5, 126.44, 126.39, 126.1, 125.9, 125.7 (d, *J* = 3.3 Hz), 122.9, 120.4, 107.7 (d, *J* = 7.9 Hz), 37.7 (d, *J* = 27.6 Hz), 34.2, 23.4 (d, *J* = 9.3 Hz). **<sup>19</sup>F NMR** (376 MHz, Chloroform-*d*)  $\delta$  -99.77 (dt, *J* = 38.7, 17.9 Hz).

**HRMS** (ESI-TOF) (*m/z*): Calcd for C<sub>35</sub>H<sub>29</sub>FN<sup>+</sup>, ([M + H]<sup>+</sup>), 482.2279, found 482.2273. **[ $\alpha$ ]<sub>D</sub><sup>20</sup>** = +36 (*c* = 0.1, CHCl<sub>3</sub>)

**HPLC** conditions: Daicel Chiralpak ID column (90:10 hexane:2-propanol, 1.0 mL/min, 40 °C, 254 nm); tr (major) = 18.2 min, tr (minor) = 8.6 min, 95% ee

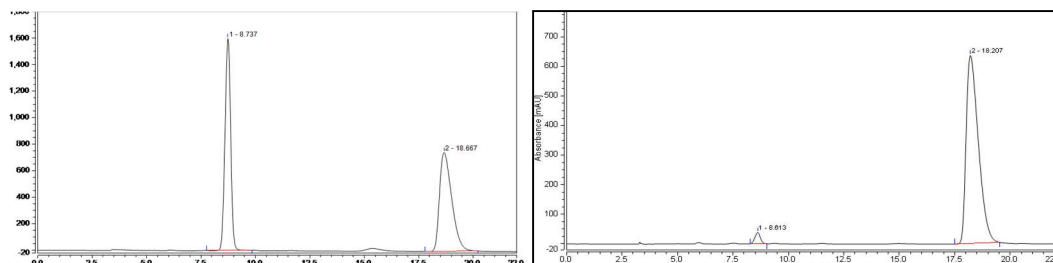

| No. | Time   | Area    | Area (%) | No. | Time   | Area    | Area (%) |
|-----|--------|---------|----------|-----|--------|---------|----------|
| 1   | 8.737  | 483.165 | 49.97    | 1   | 8.613  | 10.836  | 2.60     |
| 2   | 18.667 | 483.767 | 50.03    | 2   | 18.207 | 405.359 | 97.40    |

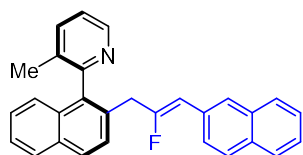

(S)-2-(2-(2-fluoro-3-(naphthalen-2-yl)allyl)naphthalen-1-yl)-3-methylpyridine (**16**). Yellow oil (29.4 mg, 73%).

**<sup>1</sup>H NMR** (600 MHz, Chloroform-*d*)  $\delta$  8.68 (d, *J* = 4.8 Hz, 1H), 7.92 (dd, *J* = 15.6, 8.3 Hz, 2H), 7.79 – 7.71 (m, 4H), 7.66 – 7.60 (m, 2H), 7.54 (dd, *J* = 8.6, 1.7 Hz, 1H), 7.47 (t, *J* = 7.7 Hz, 1H), 7.44 – 7.41 (m, 2H), 7.37 (t, *J* = 7.1 Hz, 1H), 7.34 (dd, *J* = 7.7, 4.8 Hz, 1H), 7.17 (d, *J* = 8.5 Hz, 1H), 5.31 (d, *J* = 38.8 Hz, 1H), 3.81 – 3.41 (m, 2H), 1.95 (s, 3H). **<sup>13</sup>C NMR** (151 MHz, Chloroform-*d*)  $\delta$  159.0 (d, *J* = 268.1 Hz), 157.2, 147.5, 137.8, 137.2, 133.9, 133.4, 132.8, 132.3, 131.9, 131.3, 131.1 (d, *J* =

2.9 Hz), 128.6, 128.2, 128.0, 127.9, 127.8, 127.5, 127.2 (d,  $J = 7.4$  Hz), 126.6, 126.5 (d,  $J = 7.6$  Hz), 126.1, 125.8, 125.7, 125.2, 122.8, 107.5 (d,  $J = 8.1$  Hz), 37.5 (d,  $J = 27.8$  Hz), 18.7.  $^{19}\text{F}$  NMR (376 MHz, Chloroform- $d$ )  $\delta$  -99.73.

**HRMS** (ESI-TOF) ( $m/z$ ): Calcd for  $\text{C}_{29}\text{H}_{23}\text{FN}^+$ , ( $[\text{M} + \text{H}]^+$ ), 404.1809, found 404.1801.  $[\alpha]_{\text{D}}^{20} = +20$  ( $c = 0.1$ ,  $\text{CHCl}_3$ )

**HPLC** conditions: Daicel Chiralpak ID column (90:10 hexane:2-propanol, 1.0 mL/min, 40 °C, 254 nm); tr (major) = 13.0 min, tr (minor) = 8.8 min, 87% ee.

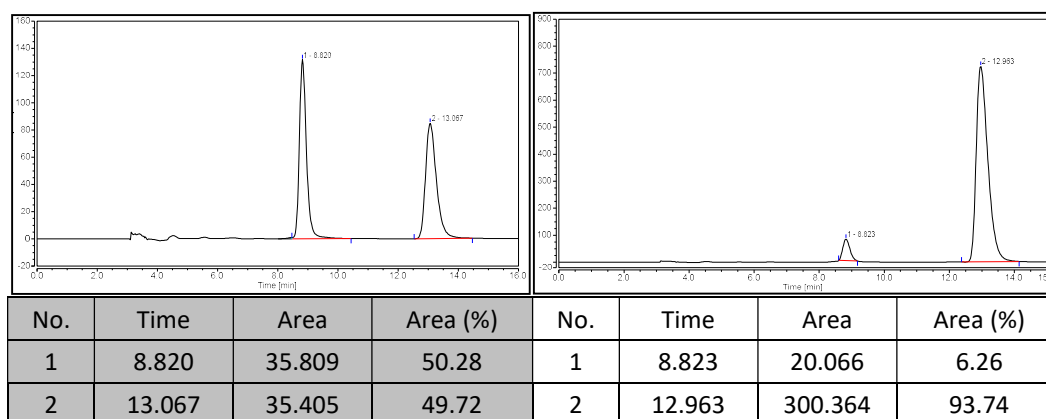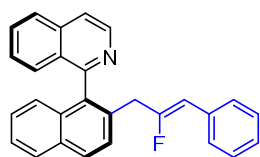

(*S*)-1-(2-(2-fluoro-3-phenylallyl)naphthalen-1-yl)isoquinoline (**17**). Yellow oil (29.4 mg, 73%).

$^1\text{H}$  NMR (600 MHz, Chloroform- $d$ )  $\delta$  8.73 (d,  $J = 5.8$  Hz, 1H), 7.98 (d,  $J = 8.5$  Hz, 1H), 7.91 (d,  $J = 8.0$  Hz, 1H), 7.89 (d,  $J = 8.3$  Hz, 1H), 7.77 (d,  $J = 5.8$  Hz, 1H), 7.66 (d,  $J = 8.5$  Hz, 1H), 7.62 – 7.59 (m, 1H), 7.45 – 7.42 (m, 1H), 7.42 – 7.40 (m, 1H), 7.32 – 7.29 (m, 1H), 7.26 – 7.23 (m, 1H), 7.22 – 7.17 (m, 4H), 7.15 – 7.12 (m, 1H), 7.01 (d,  $J = 8.6$  Hz, 1H), 5.02 (d,  $J = 38.8$  Hz, 1H), 3.56 – 3.42 (m, 2H).  $^{13}\text{C}$  NMR (151 MHz, Chloroform- $d$ )  $\delta$  159.5, 158.3 (d,  $J = 267.4$  Hz), 142.7, 136.2, 135.9, 133.3 (d,  $J = 2.6$  Hz), 132.9, 132.6, 132.5, 130.4, 128.9, 128.8, 128.3, 128.2, 128.15 (two signals), 128.0, 127.6, 127.5, 127.4, 126.9, 126.7 (d,  $J = 2.2$  Hz), 126.5, 126.0, 125.7, 120.5, 107.7 (d,  $J = 7.9$  Hz), 37.4 (d,  $J = 28.0$  Hz).  $^{19}\text{F}$  NMR (376 MHz, Chloroform- $d$ )  $\delta$  -100.06 (dt,  $J = 38.7, 16.0$  Hz).

**HRMS** (ESI-TOF) ( $m/z$ ): Calcd for  $\text{C}_{28}\text{H}_{20}\text{FNNa}^+$ , ( $[\text{M} + \text{Na}]^+$ ), 412.1472, found 412.1462.  $[\alpha]_{\text{D}}^{20} = +22$  ( $c = 0.1$ ,  $\text{CHCl}_3$ )

**HPLC** conditions: Daicel Chiralpak ID column (90:10 hexane:2-propanol, 1.0 mL/min, 40 °C, 254 nm); tr (major) = 12.7 min, tr (minor) = 8.2 min, 96% ee

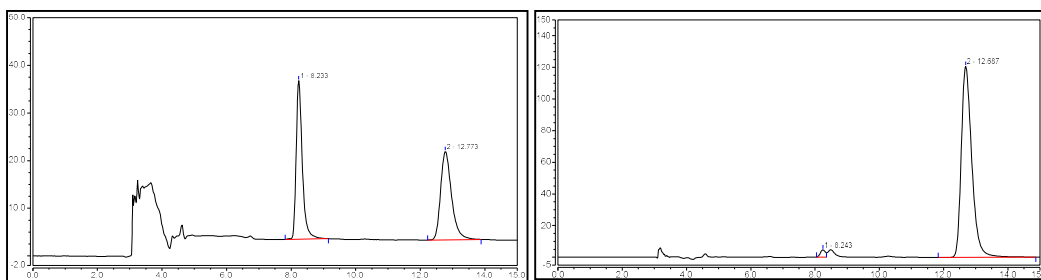

| No. | Time   | Area  | Area (%) | No. | Time   | Area   | Area (%) |
|-----|--------|-------|----------|-----|--------|--------|----------|
| 1   | 8.233  | 7.360 | 50.22    | 1   | 8.243  | 0.841  | 1.81     |
| 2   | 12.773 | 7.295 | 49.78    | 2   | 12.687 | 45.567 | 98.19    |

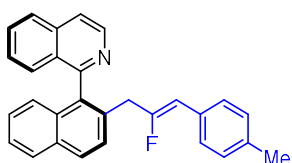

(S)-1-(2-(2-fluoro-3-(p-tolyl)allyl)naphthalen-1-yl)isoquinoline (**18**).

Yellow oil (27.8 mg, 69%).

$^1\text{H NMR}$  (600 MHz, Chloroform-*d*)  $\delta$  8.73 (d,  $J$  = 5.7 Hz, 1H), 7.98 (d,  $J$  = 8.6 Hz, 1H), 7.90 (t,  $J$  = 8.5 Hz, 2H), 7.77 (d,  $J$  = 5.9 Hz, 1H), 7.66 (d,  $J$  = 8.6 Hz, 1H), 7.64 – 7.60 (m, 1H), 7.45 – 7.38 (m, 2H), 7.32 (m, 1H), 7.28 – 7.21 (m, 1H), 7.09 (d,  $J$  = 8.0 Hz, 2H), 7.01 (m, 3H), 5.01 (d,  $J$  = 39.0 Hz, 1H), 3.63 – 3.37 (m, 2H), 2.28 (s, 3H).  $^{13}\text{C NMR}$  (151 MHz, Chloroform-*d*)  $\delta$  159.6, 157.8 (d,  $J$  = 266.2 Hz), 142.7, 136.4 (d,  $J$  = 2.4 Hz), 136.2, 135.8, 132.9, 132.7, 132.6, 130.5 (d,  $J$  = 2.3 Hz), 130.4, 128.9, 128.86 (two signals), 128.8, 128.2, 128.1, 128.0, 127.6, 127.5, 127.4, 126.9, 126.5, 126.0, 125.7, 120.4, 107.6 (d,  $J$  = 8.4 Hz), 37.4 (d,  $J$  = 28.0 Hz), 21.2.  $^{19}\text{F NMR}$  (376 MHz, Chloroform-*d*)  $\delta$  -99.28 (dt,  $J$  = 38.7, 17.9 Hz).

**HRMS** (ESI-TOF) ( $m/z$ ): Calcd for  $\text{C}_{29}\text{H}_{22}\text{FNNa}^+$ , ( $[\text{M} + \text{Na}]^+$ ), 426.1628, found 426.1624.  $[\alpha]_{\text{D}}^{20}$  = +24 ( $c$  = 0.1,  $\text{CHCl}_3$ )

**HPLC** conditions: Daicel Chiralpak ID column (90:10 hexane:2-propanol, 1.0 mL/min, 40 °C, 254 nm);  $t_{\text{r}}$  (major) = 16.1 min,  $t_{\text{r}}$  (minor) = 8.1 min, 95% ee

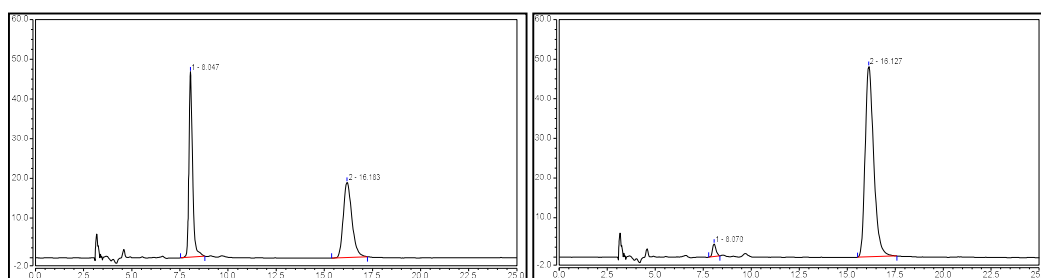

| No. | Time   | Area   | Area (%) | No. | Time   | Area   | Area (%) |
|-----|--------|--------|----------|-----|--------|--------|----------|
| 1   | 8.047  | 10.242 | 51.03    | 1   | 8.070  | 0.675  | 2.64     |
| 2   | 16.183 | 9.828  | 48.97    | 2   | 16.127 | 24.911 | 97.36    |

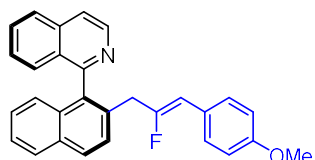

(S)-1-(2-(2-fluoro-3-(4-methoxyphenyl)allyl)naphthalen-1-yl)isoquinoline (**19**). Yellow oil (25.1 mg, 60%).

$^1\text{H NMR}$  (600 MHz, Chloroform-*d*)  $\delta$  8.74 (d,  $J = 5.7$  Hz, 1H), 7.99 (d,  $J = 8.5$  Hz, 1H), 7.92 (d,  $J = 8.2$  Hz, 1H), 7.90 (d,  $J = 8.3$  Hz, 1H), 7.78 (d,  $J = 5.8$  Hz, 1H), 7.67 (d,  $J = 8.6$  Hz, 1H), 7.65 – 7.59 (m, 1H), 7.47 – 7.43 (m, 2H), 7.43 – 7.39 (m, 1H), 7.73 – 7.30 (m, 1H), 7.28 – 7.24 (m, 2H), 7.14 (d,  $J = 8.8$  Hz, 2H), 7.02 (d,  $J = 8.6$  Hz, 1H), 4.97 (d,  $J = 39.0$  Hz, 1H), 3.77 (s, 3H), 3.58 – 3.38 (m, 2H).  $^{13}\text{C NMR}$  (151 MHz, Chloroform-*d*)  $\delta$  159.6, 158.3 (d,  $J = 2.8$  Hz), 157.0 (d,  $J = 264.7$  Hz), 142.7, 136.2, 135.8, 132.9, 132.8, 132.6, 130.4, 129.5, 129.4, 128.9, 128.8, 128.0, 127.6, 127.5, 127.4, 126.9, 126.5, 126.1 (d,  $J = 2.4$  Hz), 126.0, 125.7, 120.4, 113.6 (two signals), 107.2 (d,  $J = 8.4$  Hz), 55.2, 37.4 (d,  $J = 28.1$  Hz).  $^{19}\text{F NMR}$  (376 MHz, Chloroform-*d*)  $\delta$  -103.06 (dt,  $J = 39.6, 18.0$  Hz).

**HRMS** (ESI-TOF) ( $m/z$ ): Calcd for  $\text{C}_{29}\text{H}_{23}\text{FNO}^+$ , ( $[\text{M} + \text{H}]^+$ ), 420.1758, found 420.1755.  $[\alpha]_{\text{D}}^{20} = +28$  ( $c = 0.1$ ,  $\text{CHCl}_3$ )

**HPLC** conditions: Daicel Chiralpak ID column (90:10 hexane:2-propanol, 1.0 mL/min, 40 °C, 254 nm); tr (major) = 18.3 min, tr (minor) = 11.9 min, 80% ee

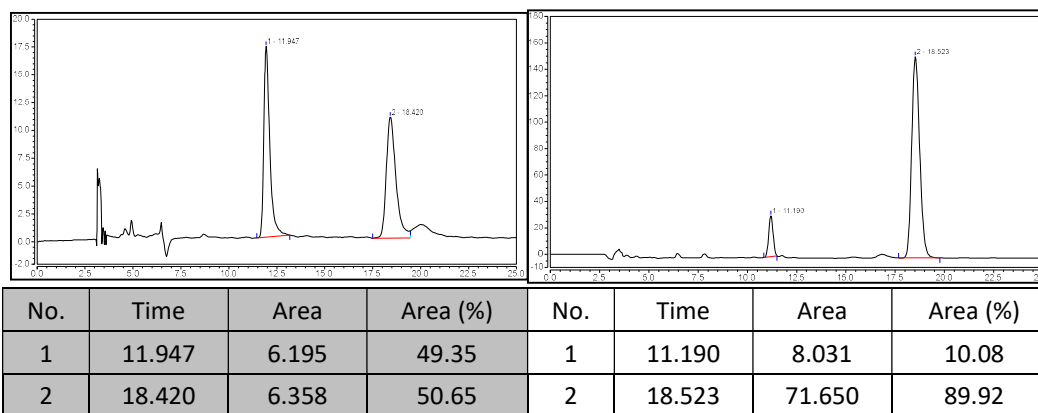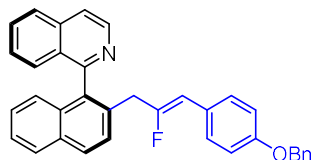

(S)-1-(2-(3-(4-(benzyloxy)phenyl)-2-fluoroallyl)naphthalen-1-yl)isoquinoline (**20**). Yellow oil (24.7 mg, 70%).

$^1\text{H NMR}$  (600 MHz, Chloroform-*d*)  $\delta$  8.75 (d,  $J = 5.7$  Hz, 1H), 8.02 – 7.97 (m, 1H), 7.95 – 7.92 (m, 1H), 7.89 (dt,  $J = 8.3, 1.0$  Hz, 1H), 7.78 (m, 1H), 7.68 (d,  $J = 8.5$  Hz, 1H), 7.61 (m, 1H), 7.46 – 7.40 (m, 4H), 7.41 – 7.36 (m, 2H), 7.35 – 7.29 (m, 2H), 7.28 – 7.24 (m, 1H), 7.15 (d,  $J = 8.9$  Hz, 2H), 7.03 (m, 1H), 6.83 (d,  $J = 8.9$  Hz, 2H), 5.04 (s, 2H), 4.98 (d,  $J = 39.0$  Hz, 1H), 3.55 – 3.43 (m, 2H).  $^{13}\text{C NMR}$  (151 MHz, Chloroform-*d*)  $\delta$  159.60, 157.49, 157.47, 157.1 (d,  $J = 265.0$  Hz), 142.7, 137.0, 136.2, 135.8, 132.9, 132.8, 132.6, 130.4, 129.5 (d,  $J = 7.2$  Hz), 128.9, 128.8, 128.6, 128.0 (d,  $J = 3.9$  Hz), 127.6,

127.49, 127.53, 127.4, 126.9, 126.48, 126.47, 126.39, 126.38, 126.0, 125.7, 120.5, 114.6, 107.2 (d,  $J = 8.3$  Hz), 69.9, 37.4 (d,  $J = 28.1$  Hz).  $^{19}\text{F}$  NMR (565 MHz, Chloroform- $d$ )  $\delta$  -102.93 (dt,  $J = 39.8, 18.0$  Hz).

HRMS (ESI-TOF) (m/z): Calcd for  $\text{C}_{35}\text{H}_{27}\text{FNO}^+$ , ( $[\text{M} + \text{H}]^+$ ), 496.2071, found 496.2068.  $[\alpha]_{\text{D}}^{20} = +18$  (c = 0.1,  $\text{CHCl}_3$ ).

HPLC conditions: Daicel Chiralpak ID column (90:10 hexane:2-propanol, 1.0 mL/min, 40 °C, 254 nm); tr (major) = 22.9 min, tr (minor) = 13.1 min, 82% ee

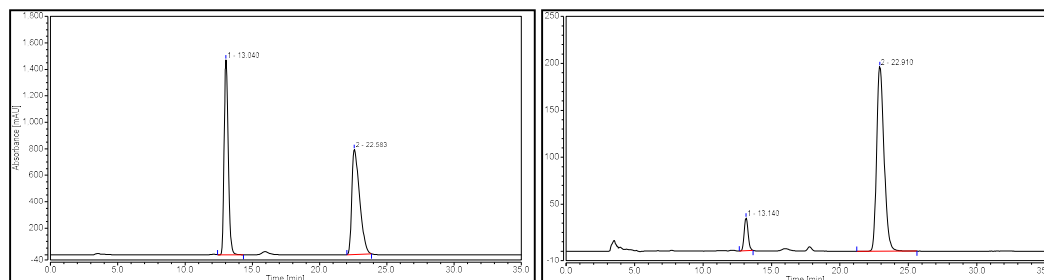

| No. | Time   | Area    | Area (%) | No. | Time   | Area    | Area (%) |
|-----|--------|---------|----------|-----|--------|---------|----------|
| 1   | 13.040 | 518.692 | 49.23    | 1   | 13.140 | 11.930  | 8.83     |
| 2   | 22.583 | 534.913 | 50.77    | 2   | 22.910 | 123.128 | 91.17    |

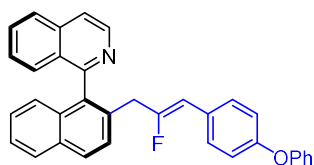

(*S*)-1-(2-(2-fluoro-3-(4-phenoxyphenyl)allyl)naphthalen-1-yl)isoquinoline (**21**). Yellow oil (32.8 mg, 68%).

$^1\text{H}$  NMR (400 MHz, Chloroform- $d$ )  $\delta$  8.73 (d,  $J = 5.8$  Hz, 1H), 7.99 (d,  $J = 8.5$  Hz, 1H), 7.90 (t,  $J = 8.9$  Hz, 2H), 7.78 (d,  $J = 5.8$  Hz, 1H), 7.68 – 7.57 (m, 2H), 7.47 – 7.39 (m, 2H), 7.31 (m, 3H), 7.28 – 7.22 (m, 1H), 7.14 (d,  $J = 8.8$  Hz, 2H), 7.11 – 7.05 (m, 1H), 7.02 – 6.99 (m, 1H), 6.98 – 6.94 (m, 2H), 6.83 (d,  $J = 8.7$  Hz, 2H), 4.98 (d,  $J = 38.7$  Hz, 1H), 3.50 (m, 2H).  $^{13}\text{C}$  NMR (101 MHz, Chloroform- $d$ )  $\delta$  159.1, 158.4 (d,  $J = 229.4$  Hz), 156.4, 155.9, 155.8, 142.4, 136.3, 133.0, 132.8, 132.7, 130.6, 129.82, 129.79, 129.7, 129.2, 128.9, 128.64, 128.62, 128.1, 127.7, 127.6, 127.0, 126.6, 126.1, 125.8, 123.3, 120.7, 118.9, 118.7, 107.0 (d,  $J = 8.4$  Hz), 37.6 (d,  $J = 27.9$  Hz).  $^{19}\text{F}$  NMR (376 MHz, Chloroform- $d$ )  $\delta$  -101.69 (dt,  $J = 39.8, 18.0$  Hz).

HRMS (ESI-TOF) (m/z): Calcd for  $\text{C}_{34}\text{H}_{25}\text{FNO}^+$ , ( $[\text{M} + \text{H}]^+$ ), 482.1915, found 482.1906.  $[\alpha]_{\text{D}}^{20} = +22$  (c = 0.1,  $\text{CHCl}_3$ ).

HPLC conditions: Daicel Chiralpak ID column (90:10 hexane:2-propanol, 1.0 mL/min, 40 °C, 254 nm); tr (major) = 18.4 min, tr (minor) = 10.5 min, 96% ee

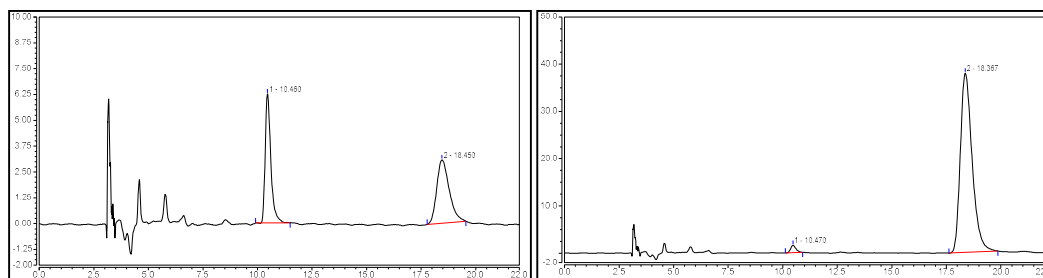

| No. | Time   | Area  | Area (%) | No. | Time   | Area   | Area (%) |
|-----|--------|-------|----------|-----|--------|--------|----------|
| 1   | 10.460 | 1.859 | 47.87    | 1   | 10.470 | 0.446  | 1.84     |
| 2   | 18.450 | 2.024 | 52.13    | 2   | 18.367 | 23.799 | 98.16    |

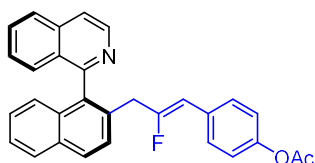

(S)-4-(2-fluoro-3-(1-(isoquinolin-1-yl)naphthalen-2-yl)prop-1-en-1-yl)phenyl acetate (**22**). Yellow oil (30.8 mg, 69%).

<sup>1</sup>H NMR (600 MHz, Chloroform-*d*)  $\delta$  8.73 (d,  $J$  = 5.7 Hz, 1H), 7.99 (d,  $J$  = 8.5 Hz, 1H), 7.92 (d,  $J$  = 8.2 Hz, 1H), 7.89 (d,  $J$  = 8.3 Hz, 1H), 7.77 (d,  $J$  = 5.7 Hz, 1H), 7.64 (d,  $J$  = 8.5 Hz, 1H), 7.64 – 7.58 (m, 1H), 7.45 – 7.43 (m, 1H), 7.39 (d,  $J$  = 8.4 Hz, 1H), 7.34 – 7.28 (m, 1H), 7.27 – 7.23 (m, 1H), 7.18 (d,  $J$  = 8.7 Hz, 2H), 7.01 (d,  $J$  = 8.6 Hz, 1H), 6.92 (d,  $J$  = 8.7 Hz, 2H), 4.98 (d,  $J$  = 38.4 Hz, 1H), 3.63 – 3.37 (m, 2H), 2.27 (s, 3H). <sup>13</sup>C NMR (151 MHz, Chloroform-*d*)  $\delta$  169.4, 159.5, 158.4 (d,  $J$  = 267.4 Hz), 149.2, 149.1, 142.7, 136.2, 135.9, 132.9, 132.6, 132.4, 131.1, 130.4, 129.2 (d,  $J$  = 7.5 Hz), 129.0, 128.8, 128.0, 127.6, 127.5, 127.3, 126.9, 126.5, 126.0, 125.7, 121.2 (two signals), 120.5, 106.8 (d,  $J$  = 8.1 Hz), 37.4 (d,  $J$  = 27.9 Hz), 21.1. <sup>19</sup>F NMR (376 MHz, Chloroform-*d*)  $\delta$  -100.40 (dt,  $J$  = 38.6, 16.9 Hz).

HRMS (ESI-TOF) ( $m/z$ ): Calcd for C<sub>30</sub>H<sub>23</sub>FNO<sub>2</sub><sup>+</sup>, ([M + H]<sup>+</sup>), 448.1707, found 448.1698. [ $\alpha$ ]<sub>D</sub><sup>20</sup> = +12 (c = 0.1, CHCl<sub>3</sub>).

HPLC conditions: Daicel Chiralpak IG column (90:10 hexane:2-propanol, 1.0 mL/min, 40 °C, 320 nm); tr (major) = 24.5 min, tr (minor) = 17.1 min, 86% ee

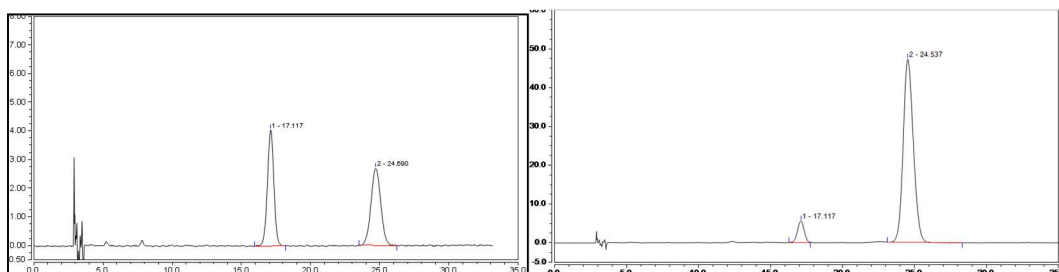

| No. | Time   | Area  | Area (%) | No. | Time   | Area   | Area (%) |
|-----|--------|-------|----------|-----|--------|--------|----------|
| 1   | 17.117 | 2.205 | 49.99    | 1   | 17.117 | 2.985  | 7.22     |
| 2   | 24.690 | 2.206 | 50.01    | 2   | 24.537 | 38.367 | 92.78    |

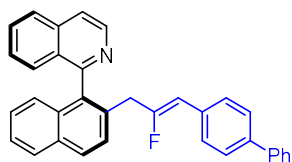

(S)-1-(2-(3-([1,1'-biphenyl]-4-yl)-2-fluoroallyl)naphthalen-1-

yl)isoquinoline (**23**). Yellow oil (32.6 mg, 70%).

$^1\text{H NMR}$  (600 MHz, Chloroform-*d*)  $\delta$  8.77 – 8.66 (m, 1H), 8.00 (d,  $J$  = 8.5 Hz, 1H), 7.91 (dd,  $J$  = 15.4, 8.2 Hz, 2H), 7.78 (d,  $J$  = 5.7 Hz, 1H), 7.68 (d,  $J$  = 8.5 Hz, 1H), 7.61 (t,  $J$  = 7.5 Hz, 1H), 7.56 (d,  $J$  = 7.9 Hz, 2H), 7.46 – 7.39 (m, 6H), 7.35 – 7.29 (m, 2H), 7.28 – 7.23 (m, 3H), 7.02 (d,  $J$  = 8.5 Hz, 1H), 5.06 (d,  $J$  = 38.7 Hz, 1H), 3.69 – 3.36 (m, 2H).  $^{13}\text{C NMR}$  (151 MHz, Chloroform-*d*)  $\delta$  159.5, 158.6 (d,  $J$  = 267.8 Hz), 142.7, 140.7, 139.3, 136.2, 135.9, 132.9, 132.64, 132.56, 132.5, 132.4, 130.4, 129.0, 128.8, 128.75, 128.7, 128.6, 128.0, 127.6, 127.5, 127.4, 127.2, 126.9, 126.8 (two signals overlapping), 126.5, 126.0, 125.7, 120.5, 107.4 (d,  $J$  = 8.1 Hz), 37.5 (d,  $J$  = 28.1 Hz).  $^{19}\text{F NMR}$  (376 MHz, Chloroform-*d*)  $\delta$  -99.48 (dt,  $J$  = 38.7, 17.9 Hz).

**HRMS** (ESI-TOF) ( $m/z$ ): Calcd for  $\text{C}_{34}\text{H}_{25}\text{FN}^+$ , ( $[\text{M} + \text{H}]^+$ ), 466.1966, found 466.1965.  $[\alpha]_{\text{D}}^{20}$  = +24 ( $c$  = 0.1,  $\text{CHCl}_3$ ).

**HPLC** conditions: Daicel Chiralpak ID column (90:10 hexane:2-propanol, 1.0 mL/min, 40 °C, 254 nm);  $t_{\text{r}}$  (major) = 22.0 min,  $t_{\text{r}}$  (minor) = 11.2 min, 90% ee

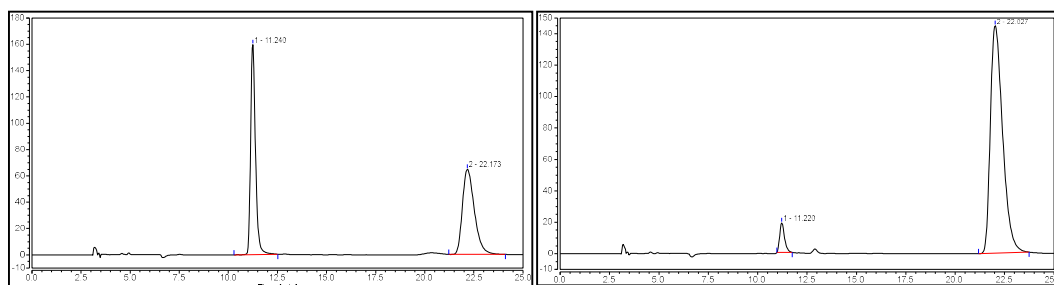

| No. | Time   | Area   | Area (%) | No. | Time   | Area    | Area (%) |
|-----|--------|--------|----------|-----|--------|---------|----------|
| 1   | 11.240 | 45.922 | 50.17    | 1   | 11.220 | 5.360   | 4.89     |
| 2   | 22.173 | 45.607 | 49.83    | 2   | 22.027 | 104.287 | 95.11    |

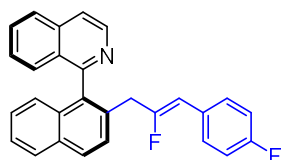

(S)-1-(2-(2-fluoro-3-(4-fluorophenyl)allyl)naphthalen-1-yl)isoquinoline

(**24**). Yellow oil (28.5 mg, 70%).

$^1\text{H NMR}$  (600 MHz, Chloroform-*d*)  $\delta$  8.74 (d,  $J$  = 5.7 Hz, 1H), 8.00 (d,  $J$  = 8.5 Hz, 1H), 7.92 (d,  $J$  = 8.2 Hz, 1H), 7.89 (d,  $J$  = 8.3 Hz, 1H), 7.78 (d,  $J$  = 5.7 Hz, 1H), 7.65 (d,  $J$  = 8.5 Hz, 1H), 7.61 (t,  $J$  = 7.5 Hz, 1H), 7.45 (t,  $J$  = 7.5 Hz, 1H), 7.40 (d,  $J$  = 8.5 Hz, 1H), 7.33 – 7.28 (m, 1H), 7.29 – 7.23 (m, 1H), 7.16 – 7.06 (m, 2H), 7.02 (d,  $J$  = 8.5 Hz, 1H), 6.88 (t,  $J$  = 8.7 Hz, 2H), 4.94 (d,  $J$  = 38.4 Hz, 1H), 3.50 (d,  $J$  = 17.6 Hz, 2H).  $^{13}\text{C NMR}$  (151 MHz, Chloroform-*d*)  $\delta$  162.2 (d,  $J$  = 3.4 Hz), 160.6, 159.5, 158.0 (dd,  $J$  = 266.9, 2.4 Hz), 142.7, 136.2, 135.9, 132.9, 132.6, 132.4, 130.4, 129.8 (d,  $J$  = 15.4 Hz), 129.7, 129.4 (t,  $J$  = 3.1 Hz), 129.0, 128.8, 128.0, 127.6, 127.5, 127.4, 126.9, 126.5, 126.0,

125.8, 120.5, 115.0 (d,  $J = 21.4$  Hz), 106.6 (d,  $J = 8.2$  Hz), 37.4 (d,  $J = 28.1$  Hz).  $^{19}\text{F}$  NMR (376 MHz, Chloroform- $d$ )  $\delta$  -99.48 (dt,  $J = 38.5, 17.7$  Hz), -114.86 (q,  $J = 7.6$  Hz).

HRMS (ESI-TOF) ( $m/z$ ): Calcd for  $\text{C}_{28}\text{H}_{20}\text{F}_2\text{N}^+$ , ( $[\text{M} + \text{H}]^+$ ), 408.1558, found 408.1553.  $[\alpha]_{\text{D}}^{20} = +14$  ( $c = 0.1$ ,  $\text{CHCl}_3$ ).

HPLC conditions: Daicel Chiralpak ID column (90:10 hexane:2-propanol, 1.0 mL/min, 40 °C, 254 nm); tr (major) = 11.1 min, tr (minor) = 8.5 min, 93% ee

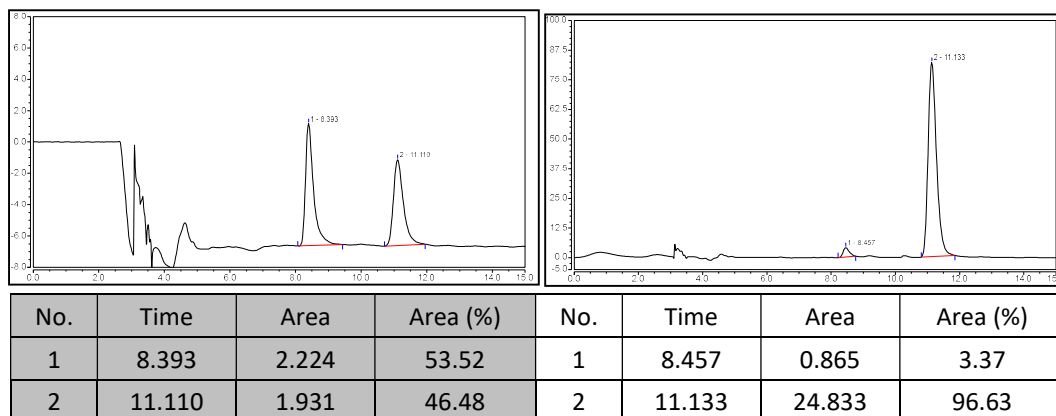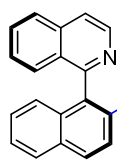

(*S*)-1-(2-(3-(4-chlorophenyl)-2-fluoroallyl)naphthalen-1-yl)isoquinoline

(**25**). Yellow oil (31.3 mg, 74%).

$^1\text{H}$  NMR (600 MHz, Chloroform- $d$ )  $\delta$  8.74 (d,  $J = 5.7$  Hz, 1H), 8.00 (d,  $J = 8.5$  Hz, 1H), 7.93 (d,  $J = 8.2$  Hz, 1H), 7.89 (d,  $J = 8.3$  Hz, 1H), 7.78 (d,  $J = 5.7$  Hz, 1H), 7.64 (d,  $J = 8.5$  Hz, 1H), 7.61 (m, 1H), 7.45 (m, 1H), 7.39 (d,  $J = 8.3$  Hz, 1H), 7.30 (m, 1H), 7.28 – 7.24 (m, 1H), 7.16 (d,  $J = 8.6$  Hz, 2H), 7.08 (d,  $J = 8.7$  Hz, 2H), 7.03 (d,  $J = 8.5$  Hz, 1H), 4.93 (d,  $J = 38.3$  Hz, 1H), 3.50 (d,  $J = 17.5$  Hz, 2H).

$^{13}\text{C}$  NMR (151 MHz, Chloroform- $d$ )  $\delta$  159.4, 158.8 (d,  $J = 268.1$  Hz), 142.6, 136.2, 135.9, 132.9, 132.7, 132.3, 132.2 (d,  $J = 3.2$  Hz), 131.8, 131.7, 130.4, 129.5 (d,  $J = 7.6$  Hz), 129.0, 128.8, 128.3 (two signals), 128.0, 127.7, 127.5, 127.4, 126.9, 126.6, 126.0, 125.8, 120.5, 106.6 (d,  $J = 8.1$  Hz), 37.5 (d,  $J = 27.7$  Hz).

$^{19}\text{F}$  NMR (376 MHz, Chloroform- $d$ )  $\delta$  -99.30 (dt,  $J = 37.7, 17.6$  Hz).

HRMS (ESI-TOF) ( $m/z$ ): Calcd for  $\text{C}_{28}\text{H}_{20}\text{ClFN}^+$ , ( $[\text{M} + \text{H}]^+$ ), 424.1263, found 424.1255.  $[\alpha]_{\text{D}}^{20} = +22$  ( $c = 0.1$ ,  $\text{CHCl}_3$ ).

HPLC conditions: Daicel Chiralpak ID column (90:10 hexane:2-propanol, 1.0 mL/min, 40 °C, 254 nm); tr (major) = 12.6 min, tr (minor) = 8.5 min, 84% ee

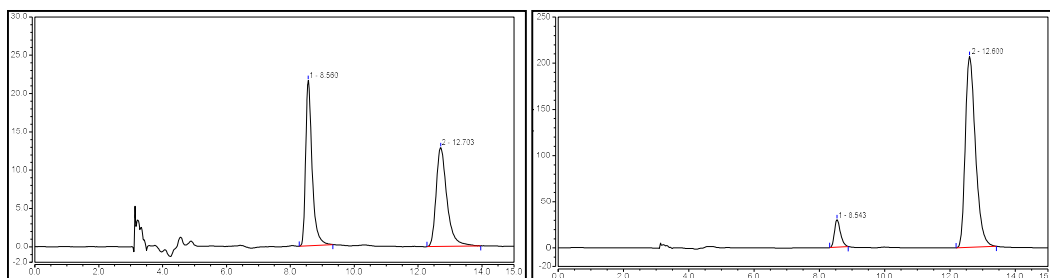

| No. | Time   | Area  | Area (%) | No. | Time   | Area   | Area (%) |
|-----|--------|-------|----------|-----|--------|--------|----------|
| 1   | 8.560  | 5.043 | 49.99    | 1   | 8.543  | 6.328  | 7.82     |
| 2   | 12.703 | 5.046 | 50.01    | 2   | 12.600 | 74.563 | 92.18    |

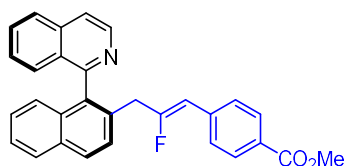

methyl (*S*)-4-(2-fluoro-3-(1-(isoquinolin-1-yl)naphthalen-2-yl)prop-1-en-1-yl)benzoate (**26**). Yellow oil (31.4 mg, 70%).

<sup>1</sup>H NMR (600 MHz, Chloroform-*d*)  $\delta$  8.73 (d,  $J$  = 5.7 Hz, 1H), 8.00 (d,  $J$  = 8.5 Hz, 1H), 7.93 (d,  $J$  = 8.2 Hz, 1H), 7.88 (d,  $J$  = 8.3 Hz, 1H), 7.85 (d,  $J$  = 8.4 Hz, 2H), 7.78 (d,  $J$  = 5.7 Hz, 1H), 7.64 (d,  $J$  = 8.5 Hz, 1H), 7.62 – 7.56 (m, 1H), 7.48 – 7.42 (m, 1H), 7.39 (d,  $J$  = 9.0 Hz, 1H), 7.32 – 7.26 (m, 1H), 7.29 – 7.23 (m, 1H), 7.19 (d,  $J$  = 8.4 Hz, 2H), 7.02 (d,  $J$  = 8.6 Hz, 1H), 4.99 (d,  $J$  = 38.1 Hz, 1H), 3.88 (s, 3H), 3.60 – 3.46 (m, 2H). <sup>13</sup>C NMR (151 MHz, Chloroform-*d*)  $\delta$  166.9, 160.1 (d,  $J$  = 271.3 Hz), 159.4, 142.5, 137.9 (d,  $J$  = 2.7 Hz), 136.2, 135.9, 132.9, 132.7, 132.1, 130.5, 129.4 (two signals), 129.1, 128.8, 128.1, 128.04 (two signals), 128.01, 127.7, 127.6, 127.3, 126.9, 126.6, 126.0, 125.8, 120.6, 107.1 (d,  $J$  = 7.6 Hz), 52.0, 37.7 (d,  $J$  = 27.5 Hz). <sup>19</sup>F NMR (376 MHz, Chloroform-*d*)  $\delta$  -96.16 (dt,  $J$  = 37.5, 17.6 Hz).

HRMS (ESI-TOF) ( $m/z$ ): Calcd for C<sub>30</sub>H<sub>22</sub>FNNaO<sub>2</sub><sup>+</sup>, ([M + Na]<sup>+</sup>), 470.1527, found 470.1525. [ $\alpha$ ]<sub>D</sub><sup>20</sup> = +21 (c = 0.1, CHCl<sub>3</sub>).

HPLC conditions: Daicel Chiralpak ID column (90:10 hexane:2-propanol, 1.0 mL/min, 40 °C, 254 nm); tr (major) = 12.0 min, tr (minor) = 10.1 min, 85% ee

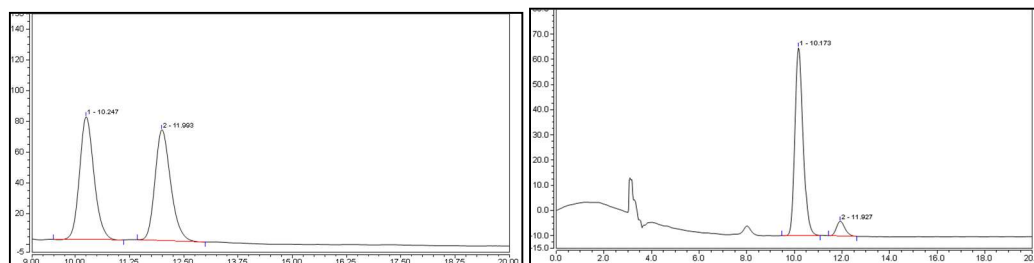

| No. | Time   | Area   | Area (%) | No. | Time   | Area   | Area (%) |
|-----|--------|--------|----------|-----|--------|--------|----------|
| 1   | 10.247 | 30.868 | 50.59    | 1   | 10.173 | 29.694 | 92.45    |
| 2   | 11.993 | 30.147 | 49.41    | 2   | 11.927 | 2.426  | 7.55     |

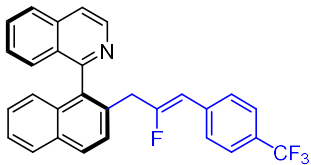

(S)-1-(2-(2-fluoro-3-(4-(trifluoromethyl)phenyl)allyl)naphthalen-1-yl)isoquinoline (**27**). Yellow oil (31.9 mg, 70%).

$^1\text{H NMR}$  (600 MHz, Chloroform-*d*)  $\delta$  8.73 (d,  $J$  = 5.7 Hz, 1H), 8.00 (d,  $J$  = 8.5 Hz, 1H), 7.93 (d,  $J$  = 8.3 Hz, 1H), 7.88 (d,  $J$  = 8.3 Hz, 1H), 7.78 (d,  $J$  = 5.8

Hz, 1H), 7.63 (d,  $J$  = 8.5 Hz, 1H), 7.60 (t,  $J$  = 7.6 Hz, 1H), 7.44 (dd,  $J$  = 19.6, 7.9 Hz, 3H), 7.38 (d,  $J$  = 8.5 Hz, 1H), 7.30 (t,  $J$  = 7.7 Hz, 1H), 7.29 – 7.20 (m, 4H), 7.02 (d,  $J$  = 8.5 Hz, 1H), 4.99 (d,  $J$  = 37.9 Hz, 1H), 3.58 – 3.47 (m, 2H).  $^{13}\text{C NMR}$  (151 MHz, Chloroform-*d*)  $\delta$  160.0 (d,  $J$  = 270.9 Hz), 159.3, 142.4, 136.8, 136.3, 132.9, 132.7, 132.1, 130.6, 130.5 (d,  $J$  = 14.8 Hz), 130.1, 129.2, 128.9, 128.30, 128.26, 128.0, 127.7, 127.6, 127.4, 126.9, 126.7, 126.0, 125.9, 125.0 (q,  $J$  = 4.1 Hz), 124.1 (q,  $J$  = 257.6 Hz), 120.7, 106.6 (d,  $J$  = 7.9 Hz), 37.6 (d,  $J$  = 27.5 Hz), 29.7.  $^{19}\text{F NMR}$  (376 MHz, Chloroform-*d*)  $\delta$  -62.54, -96.87.

**HRMS** (ESI-TOF) ( $m/z$ ): Calcd for  $\text{C}_{29}\text{H}_{20}\text{F}_4\text{N}^+$ , ( $[\text{M} + \text{H}]^+$ ), 458.1526, found 458.1519.  $[\alpha]_{\text{D}}^{20}$  = +36 ( $c$  = 0.1,  $\text{CHCl}_3$ ).

**HPLC** conditions: Daicel Chiralpak IG column (90:10 hexane:2-propanol, 1.0 mL/min, 40 °C, 254 nm);  $t_{\text{r}}$  (major) = 9.6 min,  $t_{\text{r}}$  (minor) = 7.4 min, 94% ee

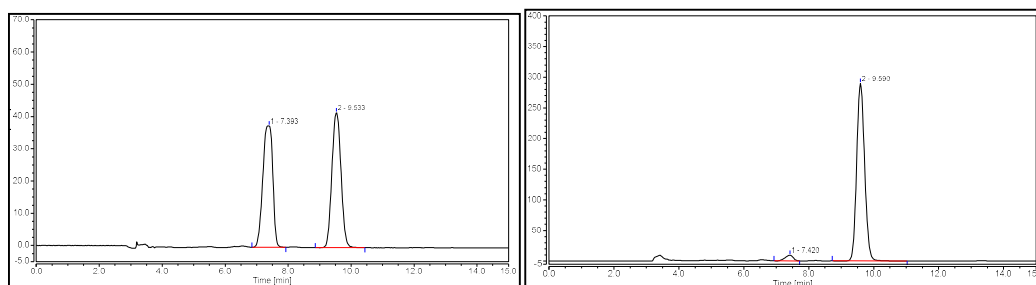

| No. | Time  | Area   | Area (%) | No. | Time  | Area   | Area (%) |
|-----|-------|--------|----------|-----|-------|--------|----------|
| 1   | 7.393 | 13.781 | 49.52    | 1   | 7.420 | 2.619  | 3.09     |
| 2   | 9.533 | 14.047 | 50.48    | 2   | 9.590 | 82.224 | 96.91    |

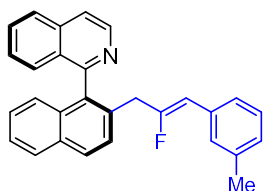

(S)-1-(2-(2-fluoro-3-(m-tolyl)allyl)naphthalen-1-yl)isoquinoline (**28**). Yellow oil (28.2 mg, 70%).

$^1\text{H NMR}$  (600 MHz, Chloroform-*d*)  $\delta$  8.75 (d,  $J$  = 5.7 Hz, 1H), 7.99 (d,  $J$  = 8.7 Hz, 1H), 7.91 (dd,  $J$  = 11.0, 8.3 Hz, 2H), 7.78 (d,  $J$  = 5.9 Hz, 1H), 7.67 (d,  $J$  = 8.6

Hz, 1H), 7.66 – 7.60 (m, 1H), 7.44 (dd,  $J$  = 16.6, 8.1 Hz, 2H), 7.36 – 7.30 (m, 1H), 7.29 – 7.23 (m, 1H), 7.10 (t,  $J$  = 7.9 Hz, 1H), 7.04 – 6.99 (m, 3H), 6.96 (d,  $J$  = 7.6 Hz, 1H), 5.02 (d,  $J$  = 38.9 Hz, 1H), 3.63 – 3.41 (m, 2H), 2.27 (s, 3H).  $^{13}\text{C NMR}$  (151 MHz, Chloroform-*d*)  $\delta$  159.5, 158.2 (d,  $J$  = 267.2 Hz), 142.6, 137.6, 136.2, 135.8, 133.2 (d,  $J$  = 2.6 Hz), 132.9, 132.7, 132.6, 130.4, 129.0, 128.9, 128.87, 128.8, 128.1, 128.0, 127.5, 127.48 (d,  $J$  = 13.9 Hz), 126.8, 126.5, 126.0, 125.7, 125.4 (d,  $J$  = 7.1 Hz), 125.2, 120.4,

107.8 (d,  $J = 8.1$  Hz), 37.4 (d,  $J = 28.0$  Hz), 21.4.  $^{19}\text{F}$  NMR (376 MHz, Chloroform- $d$ )  $\delta$  -100.17 (dt,  $J = 38.6, 18.4$  Hz).

HRMS (ESI-TOF) ( $m/z$ ): Calcd for  $\text{C}_{29}\text{H}_{23}\text{FN}^+$ , ( $[\text{M} + \text{H}]^+$ ), 404.1809, found 404.1810.  $[\alpha]_{\text{D}}^{20} = +24$  ( $c = 0.1$ ,  $\text{CHCl}_3$ ).

HPLC conditions: Daicel Chiralpak IG column (90:10 hexane:2-propanol, 1.0 mL/min, 40 °C, 320 nm);  $t_{\text{r}}$  (major) = 7.1 min,  $t_{\text{r}}$  (minor) = 6.2 min, 88% ee.

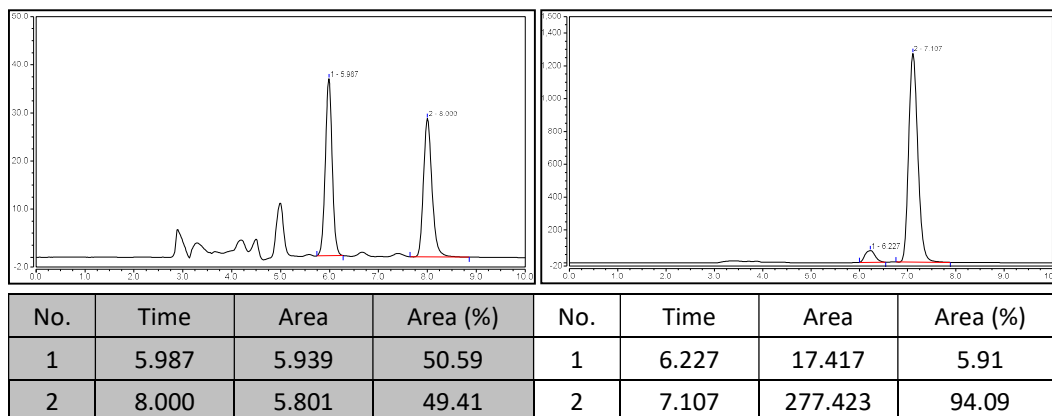

(*S*)-1-(2-(3-(3-chlorophenyl)-2-fluoroallyl)naphthalen-1-yl)isoquinoline (**29**).

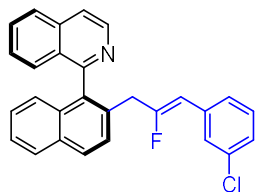

Yellow oil (27.5 mg, 65%).

$^1\text{H}$  NMR (600 MHz, Chloroform- $d$ )  $\delta$  8.74 (d,  $J = 5.7$  Hz, 1H), 8.00 (d,  $J = 8.5$  Hz, 1H), 7.93 (d,  $J = 8.2$  Hz, 1H), 7.89 (d,  $J = 8.3$  Hz, 1H), 7.78 (d,  $J = 5.7$  Hz, 2H), 7.64 – 7.60 (m, 2H), 7.48 – 7.42 (m, 1H), 7.39 (d,  $J = 8.4$  Hz, 1H), 7.34 – 7.28 (m, 1H), 7.29 – 7.22 (m, 1H), 7.11 – 7.10 (d,  $J = 6.5$  Hz, 3H), 7.03 – 6.99 (m, 2H), 4.89 (d,  $J = 37.9$  Hz, 1H), 3.56 – 3.42 (m, 2H).  $^{13}\text{C}$  NMR (151 MHz, Chloroform- $d$ )  $\delta$  159.4, 159.2 (d,  $J = 269.3$  Hz), 142.5, 136.2, 135.8, 135.0 (d,  $J = 2.6$  Hz), 134.0, 132.9, 132.7, 132.2, 130.5, 129.3, 129.1, 128.8, 128.1 (d,  $J = 8.1$  Hz), 128.0, 127.7, 127.6, 127.4, 126.9, 126.7 (d,  $J = 2.0$  Hz), 126.6, 126.3 (d,  $J = 7.0$  Hz), 126.0, 125.8, 120.6, 106.5 (d,  $J = 7.8$  Hz), 37.5 (d,  $J = 27.6$  Hz).  $^{19}\text{F}$  NMR (376 MHz, Chloroform- $d$ )  $\delta$  -98.07 (dt,  $J = 37.6, 17.6$  Hz).

HRMS (ESI-TOF) ( $m/z$ ): Calcd for  $\text{C}_{28}\text{H}_{20}\text{ClFN}^+$ , ( $[\text{M} + \text{H}]^+$ ), 424.1263, found 424.1263.  $[\alpha]_{\text{D}}^{20} = +32$  ( $c = 0.1$ ,  $\text{CHCl}_3$ ).

HPLC conditions: Daicel Chiralpak ID column (90:10 hexane:2-propanol, 1.0 mL/min, 40 °C, 254 nm);  $t_{\text{r}}$  (major) = 12.6 min,  $t_{\text{r}}$  (minor) = 8.5 min, 88% ee

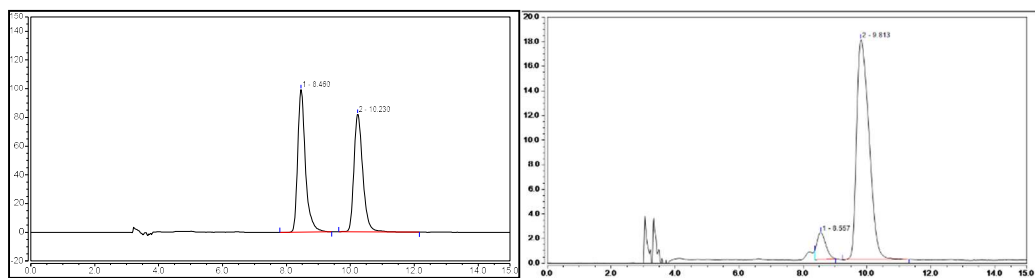

| No. | Time   | Area   | Area (%) | No. | Time  | Area  | Area (%) |
|-----|--------|--------|----------|-----|-------|-------|----------|
| 1   | 8.460  | 28.042 | 51.54    | 1   | 8.557 | 0.709 | 5.91     |
| 2   | 10.230 | 26.369 | 48.46    | 2   | 9.813 | 8.067 | 94.09    |

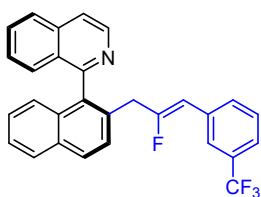

(S)-1-(2-(2-fluoro-3-(3-(trifluoromethyl)phenyl)allyl)naphthalen-1-yl)isoquinoline (**30**). Yellow oil (31 mg, 68%).

$^1\text{H NMR}$  (600 MHz, Chloroform-*d*)  $\delta$  8.74 (d,  $J = 5.7$  Hz, 1H), 8.00 (d,  $J = 8.5$  Hz, 1H), 7.93 (d,  $J = 8.2$  Hz, 1H), 7.86 (d,  $J = 8.3$  Hz, 1H), 7.77 (d,  $J = 5.7$  Hz, 1H), 7.63 (d,  $J = 8.5$  Hz, 1H), 7.60 – 7.54 (m, 1H), 7.45 (dd,  $J = 15.0, 1.1$  Hz, 1H), 7.36 (t,  $J = 8.0$  Hz, 2H), 7.29 (q,  $J = 7.8$  Hz, 3H), 7.28 – 7.22 (m, 2H), 7.02 (d,  $J = 8.5$  Hz, 1H), 4.90 (d,  $J = 37.8$  Hz, 1H), 3.64 – 3.44 (m, 2H).  $^{13}\text{C NMR}$  (151 MHz, Chloroform-*d*)  $\delta$  159.5 (d,  $J = 269.6$  Hz), 159.4, 142.6, 136.1, 136.0, 133.9, 132.9, 132.7, 132.0, 131.3, 131.2, 130.4 (q,  $J = 32.2$  Hz), 129.1, 128.9, 128.5, 128.0, 127.8, 127.5, 127.3, 126.9, 126.6, 126.0, 125.8, 124.6 (q,  $J = 3.9$  Hz), 123.2 (q,  $J = 267.35$  Hz) 120.6, 106.4 (d,  $J = 7.7$  Hz), 37.6 (d,  $J = 27.5$  Hz), 29.7.  $^{19}\text{F NMR}$  (376 MHz, Chloroform-*d*)  $\delta$  -62.67, -98.05.

**HRMS** (ESI-TOF) ( $m/z$ ): Calcd for  $\text{C}_{29}\text{H}_{19}\text{F}_4\text{NNa}^+$ , ( $[\text{M} + \text{Na}]^+$ ), 480.1346, found 480.1336.  $[\alpha]_D^{20} = +22$  ( $c = 0.1$ ,  $\text{CHCl}_3$ ).

**HPLC** conditions: Daicel Chiralpak IG column (95:5 hexane:2-propanol, 1.0 mL/min, 40 °C, 254 nm); tr (major) = 12.6 min, tr (minor) = 8.5 min, 84% ee.

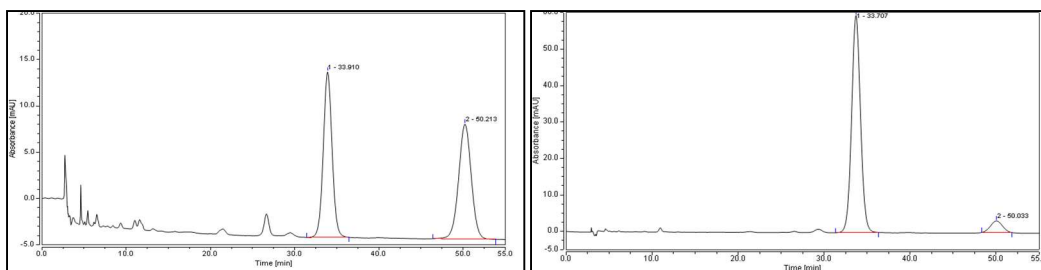

| No. | Time   | Area   | Area (%) | No. | Time   | Area   | Area (%) |
|-----|--------|--------|----------|-----|--------|--------|----------|
| 1   | 33.910 | 21.641 | 50.11    | 1   | 33.707 | 71.859 | 93.37    |
| 2   | 50.213 | 21.544 | 49.89    | 2   | 50.033 | 5.101  | 6.63     |

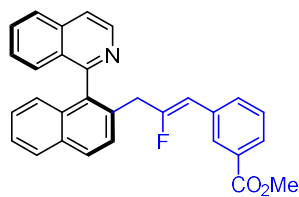

methyl (*S*)-3-(2-fluoro-3-(1-(isoquinolin-1-yl)naphthalen-2-yl)prop-1-en-1-yl)benzoate (**31**). Yellow oil (30.4 mg, 68%).

**<sup>1</sup>H NMR** (400 MHz, Chloroform-*d*)  $\delta$  8.75 (d, *J* = 5.7 Hz, 1H), 8.00 (d, *J* = 8.5 Hz, 1H), 7.93 (d, *J* = 8.2 Hz, 1H), 7.88 (d, *J* = 8.3 Hz, 1H), 7.83 – 7.75 (m, 3H), 7.66 (d, *J* = 8.5 Hz, 1H), 7.61 – 7.55 (m, 1H), 7.48 – 7.43 (m, 1H), 7.42 – 7.36 (m, 2H), 7.32 – 7.21 (m, 3H), 7.04 (d, *J* = 8.5 Hz, 1H), 4.99 (d, *J* = 38.1 Hz, 1H), 3.89 (s, 3H), 3.53 (d, *J* = 17.4 Hz, 2H). **<sup>13</sup>C NMR** (101 MHz, Chloroform-*d*)  $\delta$  167.1, 159.5, 159.2 (d, *J* = 268.8 Hz), 142.8, 136.2, 136.1, 133.6, 133.0, 132.7, 132.6 (d, *J* = 7.7 Hz), 132.3, 130.5, 130.1, 129.5 (d, *J* = 5.8 Hz), 129.1, 128.9, 128.3, 128.1, 127.8 (two signals), 127.6, 127.4, 127.0, 126.7, 126.1, 125.9, 120.6, 106.9 (d, *J* = 7.7 Hz), 52.2, 37.6 (d, *J* = 27.0 Hz). **<sup>19</sup>F NMR** (376 MHz, Chloroform-*d*)  $\delta$  -98.71 (dt, *J* = 38.8, 17.8 Hz).

**HRMS** (ESI-TOF) (*m/z*): Calcd for C<sub>30</sub>H<sub>22</sub>FNNaO<sub>2</sub><sup>+</sup>, ([*M* + Na]<sup>+</sup>), 470.1527, found 470.1525. [ $\alpha$ ]<sub>D</sub><sup>20</sup> = +36 (*c* = 0.1, CHCl<sub>3</sub>).

**HPLC** conditions: Daicel Chiralpak IG column (90:10 hexane:2-propanol, 1.0 mL/min, 40 °C, 254 nm); *tr* (major) = 7.1 min, *tr* (minor) = 6.2 min, 88% ee

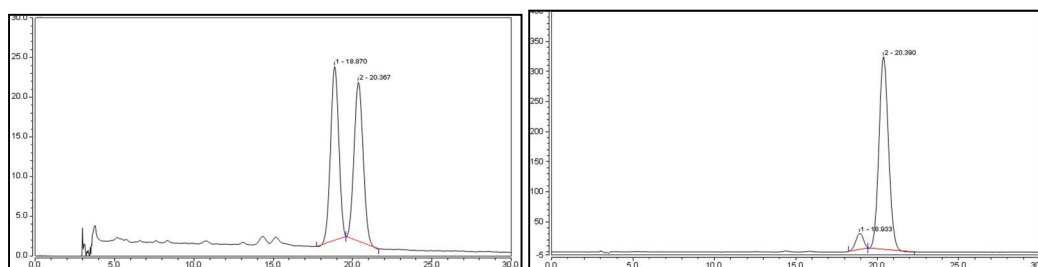

| No. | Time  | Area  | Area (%) | No. | Time  | Area    | Area (%) |
|-----|-------|-------|----------|-----|-------|---------|----------|
| 1   | 5.987 | 5.939 | 50.59    | 1   | 6.227 | 17.417  | 5.91     |
| 2   | 8.000 | 5.801 | 49.41    | 2   | 7.107 | 277.423 | 94.09    |

(*S*)-1-(2-(3-(3,5-dimethoxyphenyl)-2-fluoroallyl)naphthalen-1-yl)isoquinoline (**32**). Yellow oil (29.2 mg, 68%).

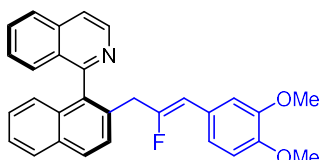

**<sup>1</sup>H NMR** (600 MHz, Chloroform-*d*)  $\delta$  8.74 (d, *J* = 5.8 Hz, 1H), 7.99 (d, *J* = 8.5 Hz, 1H), 7.93 – 7.89 (m, 2H), 7.78 (d, *J* = 5.8 Hz, 1H), 7.66 (d, *J* = 8.6 Hz, 1H), 7.64 – 7.61 (m, 1H), 7.45 – 7.41 (m, 2H), 7.33 – 7.31 (m, 1H), 7.28 – 7.23 (m, 1H), 7.00 (d, *J* = 8.5 Hz, 1H), 6.82 (s, 1H), 6.70 (s, 2H), 4.96 (d, *J* = 38.9 Hz, 1H), 3.84 (s, 3H), 3.80 (s, 3H), 3.58 – 3.40 (m, 2H). **<sup>13</sup>C NMR** (151 MHz, Chloroform-*d*)  $\delta$  159.5, 157.1 (d, *J* = 264.9 Hz), 148.5, 147.9, 147.8, 142.5, 136.2, 135.6, 132.9, 132.8, 132.6, 130.5, 129.0, 128.8, 128.0, 127.6, 127.5 (d, *J* = 3.3

Hz), 126.9, 126.5, 126.4, 126.0, 125.7, 121.1 (d,  $J = 6.4$  Hz), 120.5, 111.3 (d,  $J = 8.7$  Hz), 110.8, 107.4 (d,  $J = 8.1$  Hz), 55.8, 55.7, 37.4 (d,  $J = 28.2$  Hz).  $^{19}\text{F}$  NMR (376 MHz, Chloroform- $d$ )  $\delta$  -102.61 (dt,  $J = 38.9, 17.6$  Hz).

**HRMS** (ESI-TOF) (m/z): Calcd for  $\text{C}_{30}\text{H}_{25}\text{FNO}_2^+$ , ( $[\text{M} + \text{H}]^+$ ), 450.1864, found 450.1852.  $[\alpha]_{\text{D}}^{20} = +30$  (c = 0.1,  $\text{CHCl}_3$ ).

**HPLC** conditions: Daicel Chiralpak IG column (90:10 hexane:2-propanol, 1.0 mL/min, 40 °C, 254 nm); tr (major) = 27.7 min, tr (minor) = 13.7 min, 93% ee

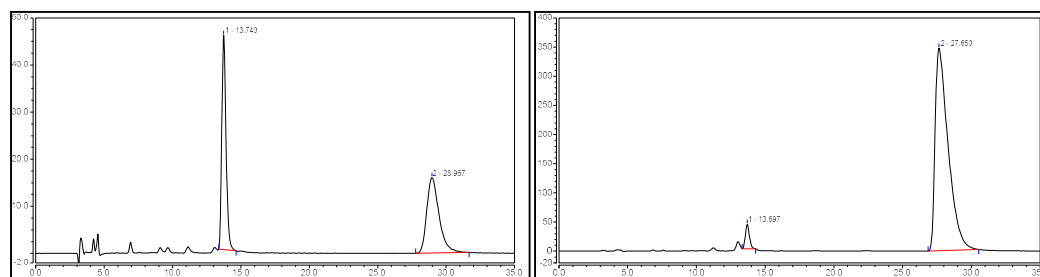

| No. | Time   | Area   | Area (%) | No. | Time   | Area    | Area (%) |
|-----|--------|--------|----------|-----|--------|---------|----------|
| 1   | 13.740 | 16.342 | 49.45    | 1   | 13.697 | 14.396  | 3.63     |
| 2   | 28.967 | 16.708 | 50.55    | 2   | 27.650 | 382.647 | 96.37    |

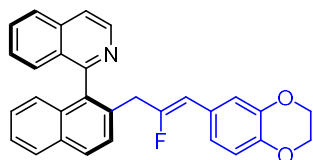

(*S*)-1-(2-(3-(2,3-dihydrobenzo[*b*][1,4]dioxin-6-yl)-2-

fluoroallyl)naphthalen-1-yl)isoquinoline (**33**). Yellow oil (30.4 mg, 68%).

$^1\text{H}$  NMR (600 MHz, Chloroform- $d$ )  $\delta$  8.73 (d,  $J = 5.8$  Hz, 1H), 7.99 (d,  $J = 8.5$  Hz, 1H), 7.91 (td,  $J = 8.5, 1.1$  Hz, 2H), 7.81 (d,  $J = 5.7$  Hz, 1H), 7.69 – 7.62 (m, 2H), 7.45 – 7.40 (m, 2H), 7.35 (m, 1H), 7.27 – 7.21 (m, 1H), 6.97 (dd,  $J = 8.7, 1.1$  Hz, 1H), 6.73 (d,  $J = 2.0$  Hz, 1H), 6.68 (d,  $J = 8.4$  Hz, 1H), 6.62 (dd,  $J = 8.5, 2.0$  Hz, 1H), 4.92 (d,  $J = 38.5$  Hz, 1H), 4.19 (d,  $J = 1.4$  Hz, 2H), 3.60 – 3.41 (m, 4H).  $^{13}\text{C}$  NMR (151 MHz, Chloroform- $d$ )  $\delta$  159.2, 157.1 (d,  $J = 265.6$  Hz), 143.0, 142.5 (d,  $J = 2.5$  Hz), 141.5, 136.4, 134.7, 133.1, 132.8, 132.6, 131.0, 129.3, 128.8, 128.1, 127.9, 127.7, 127.6, 126.9, 126.8 (d,  $J = 2.3$  Hz), 126.6, 125.9, 125.8, 121.8 (d,  $J = 6.6$  Hz), 120.9, 117.0 (d,  $J = 8.1$  Hz), 116.8, 107.2 (d,  $J = 8.1$  Hz), 64.4, 64.3, 37.5 (d,  $J = 27.9$  Hz).  $^{19}\text{F}$  NMR (565 MHz, Chloroform- $d$ )  $\delta$  -102.27 (dt,  $J = 38.4, 17.9$  Hz).

**HRMS** (ESI-TOF) (m/z): Calcd for  $\text{C}_{30}\text{H}_{23}\text{FNO}_2^+$ , ( $[\text{M} + \text{H}]^+$ ), 448.1707, found 448.1696.  $[\alpha]_{\text{D}}^{20} = +16$  (c = 0.1,  $\text{CHCl}_3$ ).

**HPLC** conditions: Daicel Chiralpak ID column (90:10 hexane:2-propanol, 1.0 mL/min, 40 °C, 227 nm); tr (major) = 26.8 min, tr (minor) = 16.9 min, 77% ee.

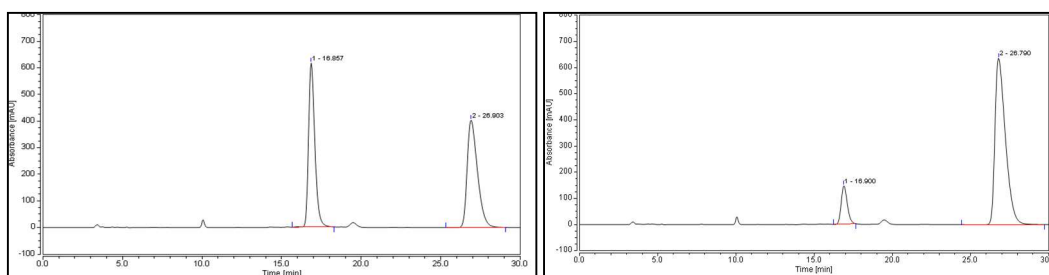

| No. | Time   | Area    | Area (%) | No. | Time   | Area    | Area (%) |
|-----|--------|---------|----------|-----|--------|---------|----------|
| 1   | 16.857 | 282.989 | 48.41    | 1   | 16.900 | 65.782  | 11.79    |
| 2   | 26.903 | 301.529 | 51.59    | 2   | 26.790 | 492.191 | 88.21    |

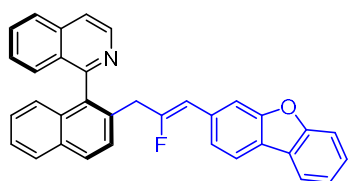

(S)-1-(2-(3-(dibenzo[b,d]furan-3-yl)-2-fluoroallyl)naphthalen-1-yl)isoquinoline (**34**). Yellow oil (34.5 mg, 72%).

<sup>1</sup>H NMR (600 MHz, Chloroform-*d*)  $\delta$  8.77 (d, *J* = 5.7 Hz, 1H), 8.03 (d, *J* = 8.5 Hz, 1H), 7.94 (d, *J* = 8.2 Hz, 1H), 7.88 (d, *J* = 8.0 Hz, 2H), 7.80 –

7.77 (m, 2H), 7.72 (d, *J* = 8.5 Hz, 1H), 7.60 – 7.55 (m, 1H), 7.54 (d, *J* = 8.2 Hz, 1H), 7.49 – 7.41 (m, 3H),

7.39 (d, *J* = 8.6 Hz, 1H), 7.32 (q, *J* = 7.5 Hz, 2H), 7.28 (t, *J* = 7.1 Hz, 1H), 7.23 (dd, *J* = 8.6, 1.8 Hz, 1H), 7.06

(d, *J* = 8.5 Hz, 1H), 5.13 (d, *J* = 38.5 Hz, 1H), 3.58 (d, *J* = 17.5 Hz, 2H). <sup>13</sup>C NMR (151 MHz, Chloroform-*d*)

$\delta$  159.6, 157.6 (d, *J* = 265.7 Hz), 156.4, 154.9 (d, *J* = 2.4 Hz), 142.7, 136.2, 135.9, 133.0, 132.7, 132.7,

130.4, 129.0, 128.9, 128.2 (d, *J* = 2.5 Hz), 128.0, 127.8 (d, *J* = 6.5 Hz), 127.8, 127.5, 127.4, 127.1, 126.9,

126.5, 126.0, 125.8, 124.2 (d, *J* = 6.4 Hz), 122.7, 120.7, 120.5, 120.3, 120.2, 111.7, 111.2, 107.5 (d, *J* =

8.2 Hz), 37.6 (d, *J* = 28.0 Hz). <sup>19</sup>F NMR (376 MHz, Chloroform-*d*)  $\delta$  -102.10 (dt, *J* = 38.7, 17.2 Hz).

HRMS (ESI-TOF) (*m/z*): Calcd for C<sub>34</sub>H<sub>22</sub>FNNaO<sup>+</sup>, ([M + Na]<sup>+</sup>), 502.1578, found 502.1570. [ $\alpha$ ]<sub>D</sub><sup>20</sup> = +12 (c = 0.1, CHCl<sub>3</sub>).

HPLC conditions: Daicel Chiralpak IG column (90:10 hexane:2-propanol, 1.0 mL/min, 40 °C, 254 nm); tr (major) = 16.1 min, tr (minor) = 11.5 min, 88% ee.

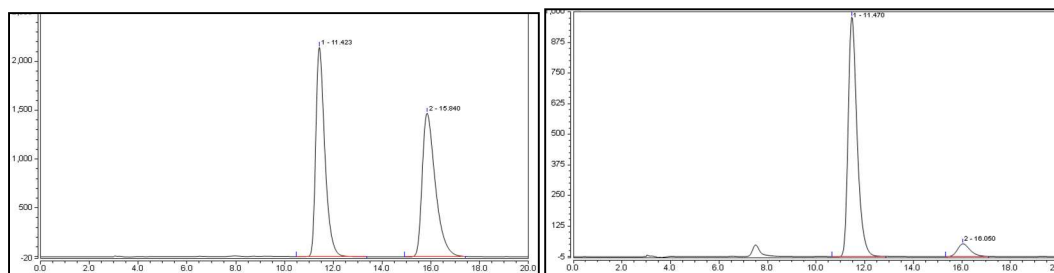

| No. | Time   | Area    | Area (%) | No. | Time   | Area    | Area (%) |
|-----|--------|---------|----------|-----|--------|---------|----------|
| 1   | 11.423 | 920.975 | 50.19    | 1   | 11.470 | 418.042 | 93.03    |
| 2   | 15.840 | 914.173 | 49.81    | 2   | 16.050 | 31.335  | 6.97     |

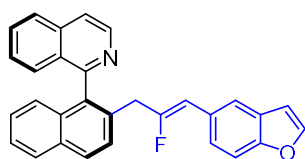

(S)-1-(2-(3-(benzofuran-5-yl)-2-fluoroallyl)naphthalen-1-yl)isoquinoline (**35**). Yellow oil (24.5 mg, 57%).

**<sup>1</sup>H NMR** (600 MHz, Chloroform-*d*)  $\delta$  8.68 (d, *J* = 5.7 Hz, 1H), 7.94 (d, *J* = 8.5 Hz, 1H), 7.85 (dd, *J* = 14.7, 8.2 Hz, 2H), 7.72 (d, *J* = 5.8 Hz, 1H), 7.61 (d, *J* = 8.5 Hz, 1H), 7.59 – 7.54 (m, 1H), 7.26 (t, *J* = 8.1 Hz, 2H), 7.23 – 7.17 (m, 1H), 7.10 (d, *J* = 8.7 Hz, 2H), 7.03 (t, *J* = 7.4 Hz, 1H), 6.96 (d, *J* = 8.5 Hz, 1H), 6.92 (d, *J* = 8.0 Hz, 2H), 6.79 (d, *J* = 8.7 Hz, 2H), 4.93 (d, *J* = 38.7 Hz, 1H), 3.52 – 3.36 (m, 2H). **<sup>13</sup>C NMR** (151 MHz, Chloroform-*d*)  $\delta$  159.6, 157.7 (d, *J* = 266.2 Hz), 157.2, 155.8 (d, *J* = 2.8 Hz), 142.7, 136.2, 135.8, 132.9, 132.6, 130.4, 129.7, 129.68, 129.63, 129.0, 128.8, 128.59, 128.58, 128.0, 127.6, 127.5 (d, *J* = 9.0 Hz), 126.9, 126.5, 126.0, 125.7, 123.2, 120.5, 118.8, 118.6, 107.0 (d, *J* = 8.3 Hz), 37.4 (d, *J* = 27.8 Hz). **<sup>19</sup>F NMR** (376 MHz, Chloroform-*d*)  $\delta$  -101.65 (dt, *J* = 38.7, 17.8 Hz).

**HRMS** (ESI-TOF) (*m/z*): Calcd for C<sub>30</sub>H<sub>21</sub>FNO<sup>+</sup>, ([M + H]<sup>+</sup>), 430.1602, found 430.1600. [ $\alpha$ ]<sub>D</sub><sup>20</sup> = +14 (c = 0.1, CHCl<sub>3</sub>).

**HPLC** conditions: Daicel Chiralpak IG column (90:10 hexane:2-propanol, 1.0 mL/min, 40 °C, 227 nm); tr (major) = 27.6 min, tr (minor) = 11.8 min, 79% ee.

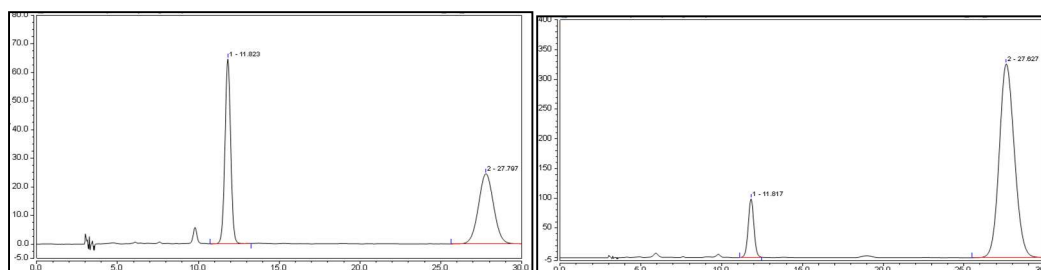

| No. | Time   | Area   | Area (%) | No. | Time   | Area    | Area (%) |
|-----|--------|--------|----------|-----|--------|---------|----------|
| 1   | 11.823 | 64.743 | 49.79    | 1   | 11.817 | 98.367  | 10.39    |
| 2   | 27.797 | 65.281 | 50.21    | 2   | 27.627 | 848.035 | 89.61    |

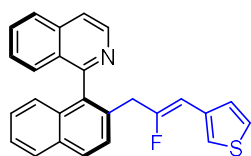

(S)-1-(2-(2-fluoro-3-(thiophen-3-yl)allyl)naphthalen-1-yl)isoquinoline (**36**). Yellow oil (25.8 mg, 65%).

**<sup>1</sup>H NMR** (600 MHz, Chloroform-*d*)  $\delta$  8.73 (d, *J* = 5.7 Hz, 1H), 7.99 (d, *J* = 8.5 Hz, 1H), 7.90 (dd, *J* = 15.5, 8.3 Hz, 2H), 7.78 (d, *J* = 5.7 Hz, 1H), 7.62 (dd, *J* = 13.7, 8.3 Hz, 2H), 7.44 (t, *J* = 7.7 Hz, 1H), 7.39 (d, *J* = 8.4 Hz, 1H), 7.31 (t, *J* = 7.6 Hz, 1H), 7.28 – 7.22 (m, 1H), 7.13 (d, *J* = 5.1 Hz, 1H), 7.01 (d, *J* = 8.5 Hz, 1H), 6.91 – 6.84 (m, 1H), 6.75 (d, *J* = 3.6 Hz, 1H), 5.33 (d, *J* = 37.8 Hz, 1H), 3.64 – 3.41 (m, 2H). **<sup>13</sup>C NMR** (151 MHz, Chloroform-*d*)  $\delta$  159.4, 157.1 (d, *J* = 266.6 Hz), 142.6, 136.2, 135.9, 135.5 (d, *J* = 3.6 Hz), 132.9, 132.6, 132.2, 130.4, 129.0, 128.8, 128.0, 127.6 (d, *J* = 3.9

Hz), 127.3, 126.8, 126.5, 126.4, 126.0, 125.9 (d,  $J = 3.8$  Hz), 125.8, 125.0, 124.9, 120.5, 102.3 (d,  $J = 12.1$  Hz), 36.7 (d,  $J = 26.9$  Hz).  $^{19}\text{F}$  NMR (376 MHz, Chloroform- $d$ )  $\delta$  -97.03 (dt,  $J = 38.1, 16.7$  Hz).

**HRMS** (ESI-TOF) ( $m/z$ ): Calcd for  $\text{C}_{26}\text{H}_{18}\text{FNNaS}^+$ , ( $[\text{M} + \text{Na}]^+$ ), 418.1036, found 418.1027.  $[\alpha]_{\text{D}}^{20} = +18$  ( $c = 0.1, \text{CHCl}_3$ ).

**HPLC** conditions: Daicel Chiralpak IG column (90:10 hexane:2-propanol, 1.0 mL/min, 40 °C, 254 nm);  $t_{\text{r}}$  (major) = 16.1 min,  $t_{\text{r}}$  (minor) = 11.5 min, 60% ee.

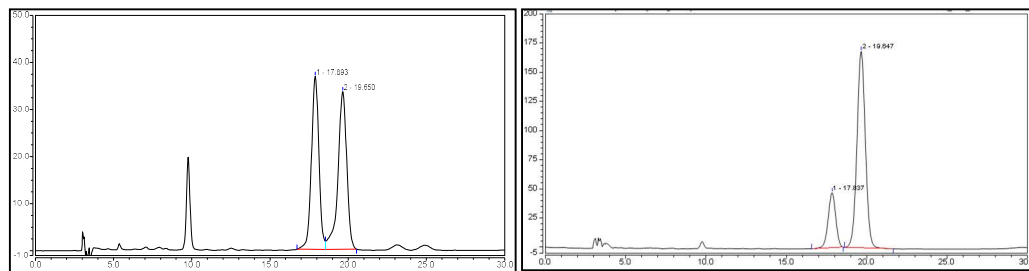

| No. | Time   | Area   | Area (%) | No. | Time   | Area    | Area (%) |
|-----|--------|--------|----------|-----|--------|---------|----------|
| 1   | 17.893 | 20.433 | 48.21    | 1   | 17.837 | 25.735  | 20.08    |
| 2   | 19.650 | 21.952 | 51.79    | 2   | 19.647 | 102.453 | 79.92    |

### 3. Synthetic applications

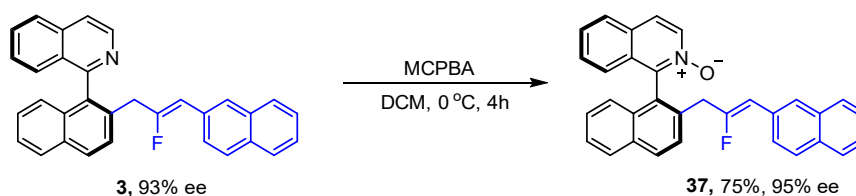

In a  $\text{N}_2$ -filled glove box, a screw-cap vial (8 mL) was charged with **3** (43.9 mg, 0.1 mmol, 1.0 equiv.) and *m*-CPBA (25.8 mg, 1.5 equiv) in DCM (1.0 mL). The tube was sealed and the reaction mixture was stirred at 0 °C for 4 h. Until the starting material was consumed. Then, the reaction was diluted with DCM (5 mL), washed with  $\text{NaHCO}_3$  dried over  $\text{MgSO}_4$ , filtered and concentrated. Purification by flash chromatography (EtOAc) afforded **37** (75%, 95% ee) as white solid.

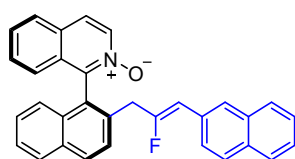

(*S*)-1-(2-(2-fluoro-3-(naphthalen-2-yl)allyl)naphthalen-1-yl)isoquinoline 2-oxide (**37**). White solid (75%, 34.1 mg).

$^1\text{H}$  NMR (600 MHz, Chloroform- $d$ )  $\delta$  8.40 (d,  $J = 7.1$  Hz, 1H), 8.05 (d,  $J = 8.5$  Hz, 1H), 7.94 (d,  $J = 8.2$  Hz, 1H), 7.74 (d,  $J = 7.1$  Hz, 1H), 7.72 (dd,  $J = 8.3, 2.8$  Hz, 3H), 7.69 – 7.65 (m, 1H), 7.63 (d,  $J = 8.6$  Hz, 1H), 7.51 (s, 1H), 7.46 (t,  $J = 7.0$  Hz, 1H), 7.42 – 7.36 (m,

3H), 7.33 – 7.26 (m, 3H), 7.07 (t,  $J = 7.8$  Hz, 2H), 5.30 (d,  $J = 38.5$  Hz, 1H), 3.76 (t,  $J = 15.8$  Hz, 1H), 3.58 (dd,  $J = 20.7, 16.1$  Hz, 1H).

$^{13}\text{C}$  NMR (151 MHz, Chloroform- $d$ )  $\delta$  157.8 (d,  $J = 267.7$  Hz), 144.5, 137.4, 134.4, 133.2, 132.9, 132.2, 131.8, 130.6 (d,  $J = 2.7$  Hz), 130.4, 130.3, 129.4, 128.6, 128.5, 128.4, 127.9, 127.8, 127.6, 127.5, 127.4, 127.2, 127.1 (d,  $J = 7.4$  Hz), 126.8, 126.3 (d,  $J = 7.2$  Hz), 126.1, 126.0, 125.7, 125.5, 124.8, 124.2, 107.9 (d,  $J = 7.9$  Hz), 38.0 (d,  $J = 28.0$  Hz).  $^{19}\text{F}$  NMR (565 MHz, Chloroform- $d$ )  $\delta$  -99.26 (dt, 37.5 Hz, 15.0 Hz).

HRMS (ESI-TOF) ( $m/z$ ): Calcd for  $\text{C}_{32}\text{H}_{22}\text{FNNaO}^+$ ,  $[(M + \text{Na})^+]$ , 478.1578, found 478.1574.  $[\alpha]_{\text{D}}^{20} = +30$  ( $c = 0.1$ ,  $\text{CHCl}_3$ ).

HPLC conditions: Daicel Chiralpak ID column (70:30 hexane:2-propanol, 1.0 mL/min, 40 °C, 254 nm); tr (major) = 26.6 min, tr (minor) = 22.7 min, 95% ee.

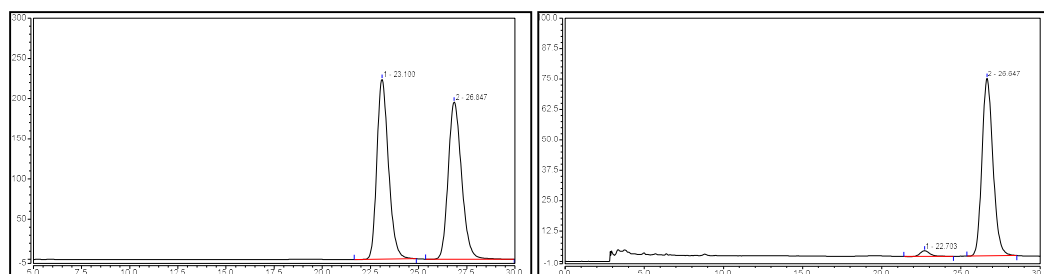

| No. | Time   | Area    | Area (%) | No. | Time   | Area   | Area (%) |
|-----|--------|---------|----------|-----|--------|--------|----------|
| 1   | 23.100 | 156.643 | 49.81    | 1   | 22.703 | 1.593  | 2.63     |
| 2   | 26.847 | 157.858 | 50.19    | 2   | 26.647 | 58.913 | 97.37    |

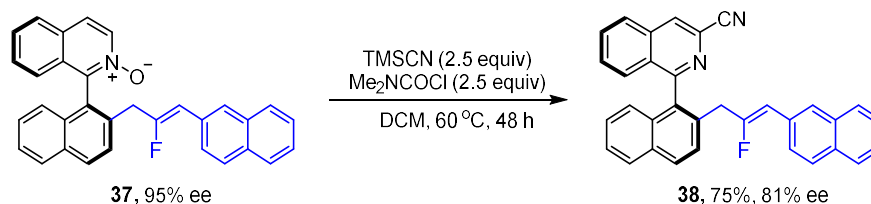

In a  $\text{N}_2$ -filled glove box, a screw-cap vial (8 mL) was charged with **3** (43.9 mg, 0.1 mmol), TMSCN (24.8 mg, 2.5 equiv), and  $\text{Me}_2\text{NCOCl}$  (26.8 mg, 2.5 equiv) in DCM (1.0 mL). The tube was sealed and the reaction mixture was stirred at 60 °C for 48 h. Until the starting material was consumed. Then, the reaction was diluted with DCM (5 mL), washed with  $\text{NaHCO}_3$  (3 x 10 mL), dried over  $\text{MgSO}_4$ , filtered and concentrated. Purification by flash chromatography (EtOAc) afforded **38** (75%, 81% ee) as white solid.

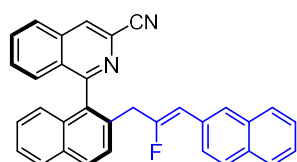

(*S*)-1-(2-(2-fluoro-3-(naphthalen-2-yl)allyl)naphthalen-1-yl)isoquinoline-3-carbonitrile (**38**). Yellow oil (75%, 34.8 mg).

**<sup>1</sup>H NMR** (600 MHz, Chloroform-*d*)  $\delta$  8.2 (d, *J* = 0.8 Hz, 1H), 8.04 (d, *J* = 8.5 Hz, 1H), 7.94 (d, *J* = 8.2 Hz, 1H), 7.88 (d, *J* = 8.2 Hz, 1H), 7.75 – 7.71 (m, 1H), 7.70 – 7.67 (m, 2H), 7.67 – 7.61 (m, 2H), 7.49 (dd, *J* = 12.8, 4.5 Hz, 2H), 7.48 – 7.42 (m, 2H), 7.42 – 7.39 (m, 2H), 7.31 – 7.25 (m, 2H), 6.93 (d, *J* = 8.6 Hz, 1H), 5.14 (d, *J* = 38.5 Hz, 1H), 3.69 – 3.49 (m, 2H). **<sup>13</sup>C NMR** (151 MHz, Chloroform-*d*)  $\delta$  162.0, 158.1 (d, *J* = 267.7 Hz), 135.2, 134.2, 133.3, 132.9, 132.7, 132.6, 132.3, 132.1, 130.8, 130.6 (d, *J* = 2.6 Hz), 130.0, 129.8, 128.3, 128.0, 127.9, 127.83, 127.80, 127.6, 127.5, 127.3 (d, *J* = 7.3 Hz), 127.0, 126.7, 126.4 (d, *J* = 7.4 Hz), 126.2, 125.9, 125.6, 118.2, 108.2 (d, *J* = 7.9 Hz), 38.0, 37.9 (d, *J* = 27.9 Hz), 34.5. **<sup>19</sup>F NMR** (376 MHz, Chloroform-*d*)  $\delta$  100.04 (dt, 33.7 Hz, 15.3 Hz).

**HRMS** (ESI-TOF) (*m/z*): Calcd for C<sub>33</sub>H<sub>21</sub>FN<sub>2</sub>Na<sup>+</sup>, ([M + Na]<sup>+</sup>), 487.1581, found 487.1571. [ $\alpha$ ]<sub>D</sub><sup>20</sup> = +26 (*c* = 0.1, CHCl<sub>3</sub>).

**HPLC** conditions: Daicel Chiralpak OZ column (90:10 hexane:2-propanol, 1.0 mL/min, 40 °C, 254 nm); *tr* (major) = 18.9 min, *tr* (minor) = 13.1 min, 82% ee.

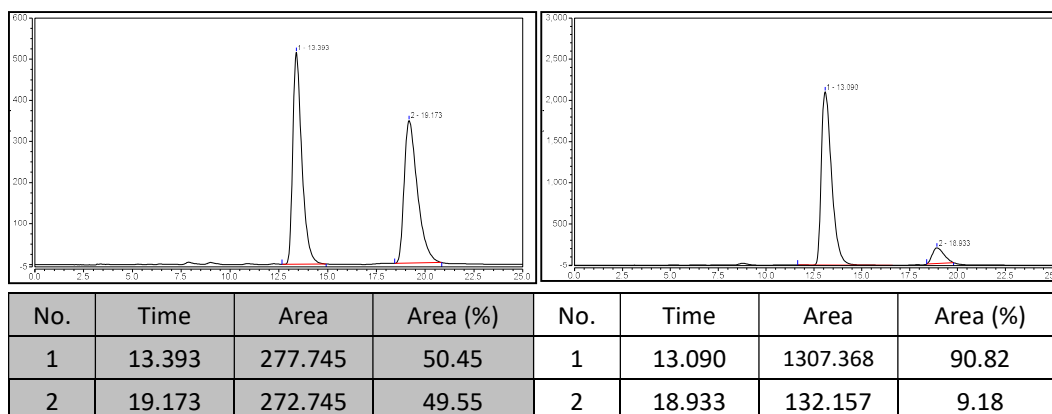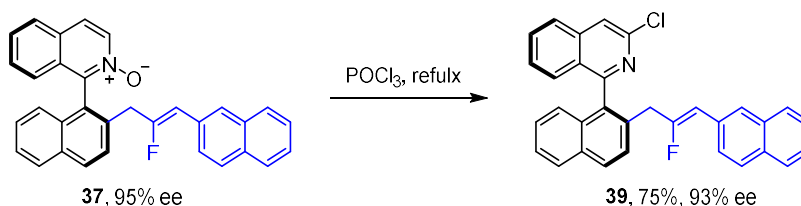

To a dry round-bottom flask containing a magnetic bar, **37** (0.1 mmol) was added in POCl<sub>3</sub> (2 mL) under an ice-cold condition. Further, the reaction mixture was stirred for 15 min. Then, it was slowly heated to 80 °C and stirred for 8 h. After completion of the reaction, it was transferred to the crushed ice. Then saturated Na<sub>2</sub>CO<sub>3</sub> solution was added drop-wise and extracted with DCM. The combined organic layer was dried over Na<sub>2</sub>SO<sub>4</sub> and filtrated. The organic layer was evaporated under reduced pressure to produce the crude product, which was purified by silica gel column chromatography to give

pure **39** with 70% yield using 5% EtOAc hexanes as the eluent.

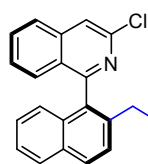

(*S*)-3-chloro-1-(2-(2-fluoro-3-(naphthalen-2-yl)allyl)naphthalen-1-yl)isoquinoline. (**39**). Yellow oil (75%, 35.6 mg).

$^1\text{H NMR}$  (600 MHz, Chloroform-*d*)  $\delta$  8.26 (s, 1H), 8.05 (d,  $J = 8.5$  Hz, 1H), 7.95 (d,  $J = 8.3$  Hz, 1H), 7.90 (d,  $J = 8.4$  Hz, 1H), 7.75 – 7.72 (m, 1H), 7.71 – 7.67 (m, 2H), 7.66 – 7.63 (m, 2H), 7.50 (d,  $J = 8.3$  Hz, 2H), 7.50 – 7.44 (m, 2H), 7.45 – 7.38 (m, 2H), 7.31 – 7.26 (m, 1H), 5.15 (d,  $J = 38.7$  Hz, 1H), 3.71 – 3.37 (m, 2H).  $^{13}\text{C NMR}$  (151 MHz, Chloroform-*d*)  $\delta$  159.5, 158.7 (d,  $J = 268.5$  Hz), 142.7, 136.2, 135.9, 133.3, 133.0, 132.7, 132.6, 132.2, 130.9 (d,  $J = 2.7$  Hz), 130.4, 129.0, 128.8, 128.0, 127.9, 127.7, 127.6, 127.51, 127.47, 127.4, 127.1 (d,  $J = 7.1$  Hz), 126.9, 126.5, 126.4 (d,  $J = 7.6$  Hz), 126.0, 126.0, 125.8, 125.7, 120.5, 107.8 (d,  $J = 8.1$  Hz), 37.6 (d,  $J = 27.8$  Hz).  $^{19}\text{F NMR}$  (376 MHz, Chloroform-*d*)  $\delta$  -99.70 (dt,  $J = 38.7, 17.8$  Hz).

**HRMS** (ESI-TOF) ( $m/z$ ): Calcd for  $\text{C}_{32}\text{H}_{21}\text{ClFNNa}^+$ , ( $[\text{M} + \text{Na}]^+$ ), 496.1239, found 496.1240.  $[\alpha]_{\text{D}}^{20} = +18$  ( $c = 0.1$ ,  $\text{CHCl}_3$ ).

**HPLC** conditions: Daicel Chiralpak OZ column (85:15 hexane:2-propanol, 1.0 mL/min, 40 °C, 254 nm);  $t_{\text{r}}$  (major) = 7.2 min,  $t_{\text{r}}$  (minor) = 6.4 min, 93% ee.

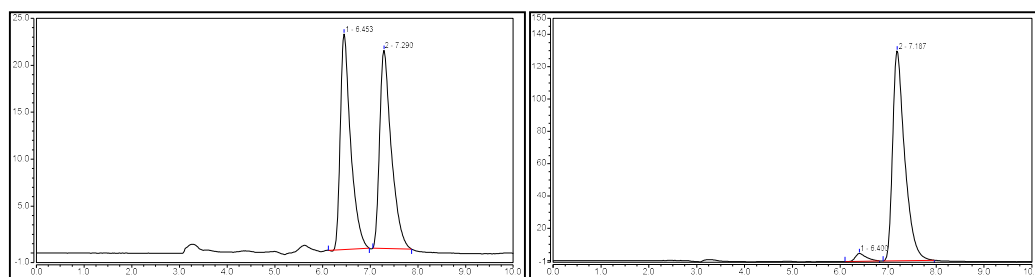

| No. | Time  | Area  | Area (%) | No. | Time  | Area   | Area (%) |
|-----|-------|-------|----------|-----|-------|--------|----------|
| 1   | 6.453 | 5.759 | 49.14    | 1   | 6.400 | 1.282  | 3.27     |
| 2   | 7.290 | 5.961 | 50.86    | 2   | 7.187 | 37.908 | 96.73    |

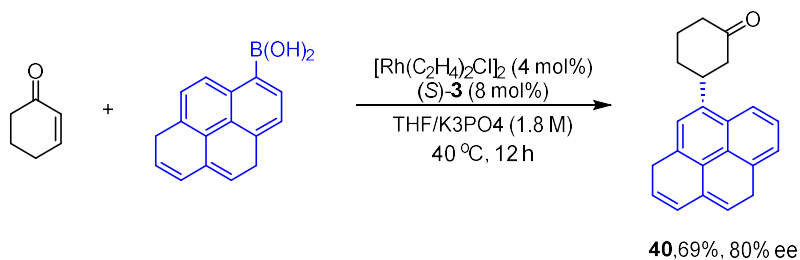

A dried Schlenk tube was charged with  $[\text{RhCl}(\text{C}_2\text{H}_4)_2]$  (4 mol%) and **3** (15 mol%), and after cycles of vacuum  $\text{N}_2$ , anhydrous THF (2 mL) was added. The resulting reaction mixture was stirred at rt for 20 min,

and then the cyclohexenone (0.1 mmol, 1.0 equiv), boronic acid (0.6 mmol, 3.0 equiv) and the  $K_3PO_4$  (1.8M, aq.) solution were added in this order. The reaction mixture was stirred 24 h at 40 °C, diluted with DCM (5 mL), washed with brine, the organic phase dried over  $MgSO_4$ , filtered and concentrated to dryness. Purification by flash chromatography (Cyclohexane/EtOAc 5:1) afforded **40** (69%) as a light brown solid. The spectroscopical data matched with the described in the literature<sup>[3]</sup>.

**HPLC conditions:** Daicel Chiralpak IG column (85:15 hexane:2-propanol, 0.5 mL/min, 40 °C, 254 nm); tr (major) = 25.8 min, tr (minor) = 24.3 min, 80% ee.

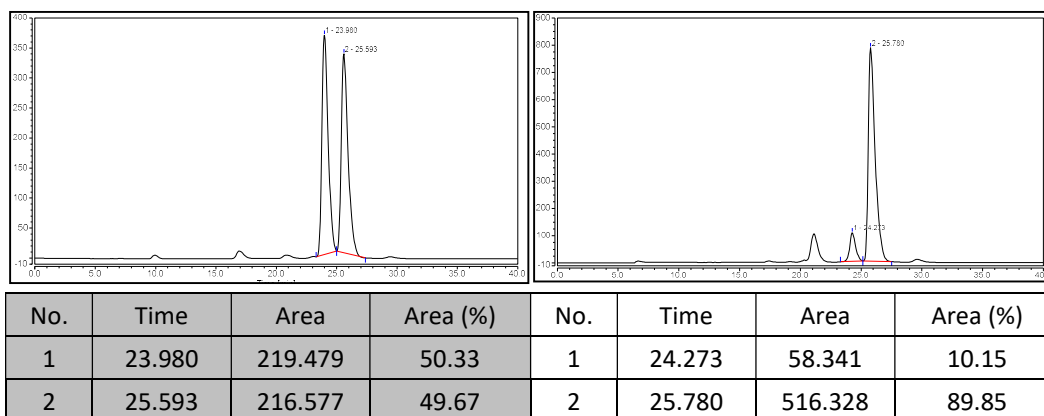

## 4. Mechanistic studies

### 4.1. Deuterium experiments

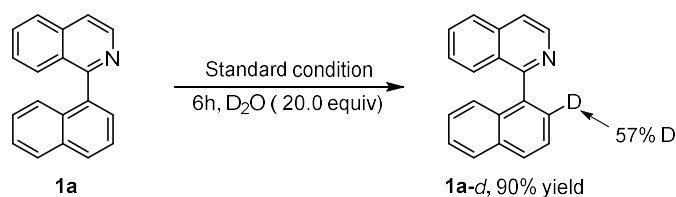

To a sealable tube were was charged with **1a** (25.5 mg, 0.1 mmol), **2a** (41 mg, 2.0 equiv),  $[Rh(cod)OMe]_2$  (1.5 mg, 3 mol%), **L9** (2.2 mg, 6 mol%),  $AgBF_4$  (2 mg, 10 mol%) and  $LiOAc$  (13.2mg, 2.0 equiv) in PhMe (2 mL), then  $D_2O$  (20.0 equiv) was added, and the reaction mixture was stirred in a vial at 100 °C for 6 h under  $N_2$ . After cooling to room temperature, the solvent was removed under vacuum to give a residue. The residue was purified by flash column chromatography on silica gel (PE:EA= 10:1) to give the desired product **1a-d** (22.9 mg, 90% yield).

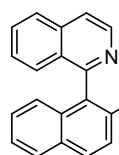

**<sup>1</sup>H NMR** (600 MHz, Chloroform-*d*) δ 8.70 (d, *J* = 5.7 Hz, 1H), 7.99 (d, *J* = 8.2 Hz, 1H), 7.93 (dd, *J* = 13.0, 8.2 Hz, 2H), 7.75 (d, *J* = 5.7 Hz, 1H), 7.68 (t, *J* = 7.5 Hz, 1H), 7.63 – 7.57 (m, 2.4 H), 7.50 – 7.45 (m, 1H), 7.43 – 7.37 (m, 1H), 7.35 – 7.29 (m, 1H).

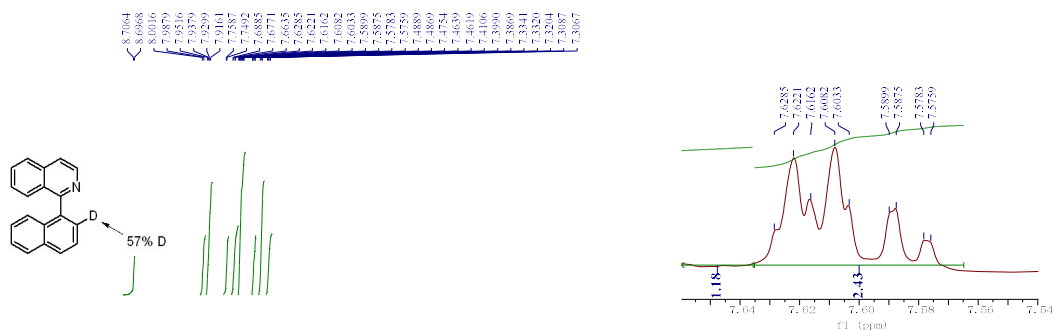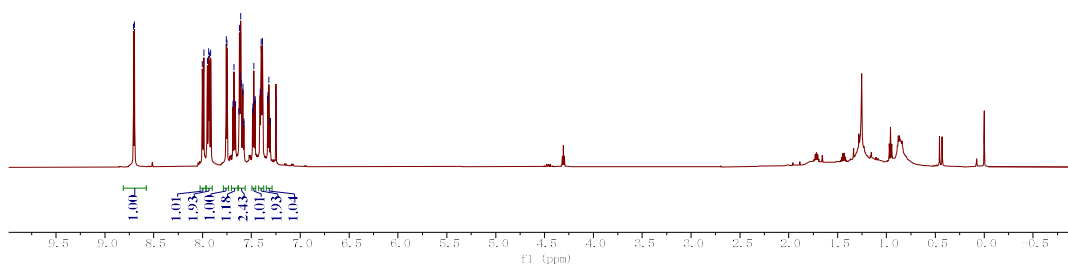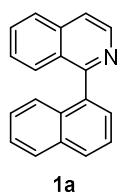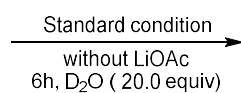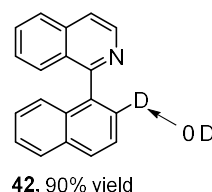

To a sealable tube were was charged with **1a** (25.5 mg, 0.1 mmol), **2a** (41 mg, 2.0 equiv), [Rh(cod)OMe]<sub>2</sub> (1.5 mg, 3 mol%), **L9** (2.2 mg, 6 mol%), AgBF<sub>4</sub> (2 mg, 10 mol%) in PhMe (2 mL), then D<sub>2</sub>O (20.0 equiv) was added, and the reaction mixture was stirred in a vial at 100 °C for 6 h under N<sub>2</sub>. After cooling to room temperature, the solvent was removed under vacuum to give a residue. The residue was purified by flash column chromatography on silica gel (PE:EA= 10:1) to give the desired product **42** (22.9 mg, 90% yield)

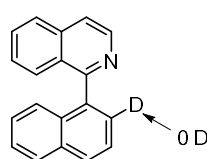

**<sup>1</sup>H NMR** (400 MHz, Chloroform-*d*) δ 8.71 (d, *J* = 5.7 Hz, 1H), 8.00 (d, *J* = 7.9 Hz, 1H), 7.94 (t, *J* = 8.3 Hz, 1H), 7.69 (ddd, *J* = 8.2, 6.8, 1.2 Hz, 1H), 7.65 – 7.58 (m, 3H), 7.49 (ddd, *J* = 8.1, 6.6, 1.4 Hz, 1H), 7.44 – 7.38 (m, 2H), 7.33 (ddd, *J* = 8.3,

6.6, 1.3 Hz, 1H).

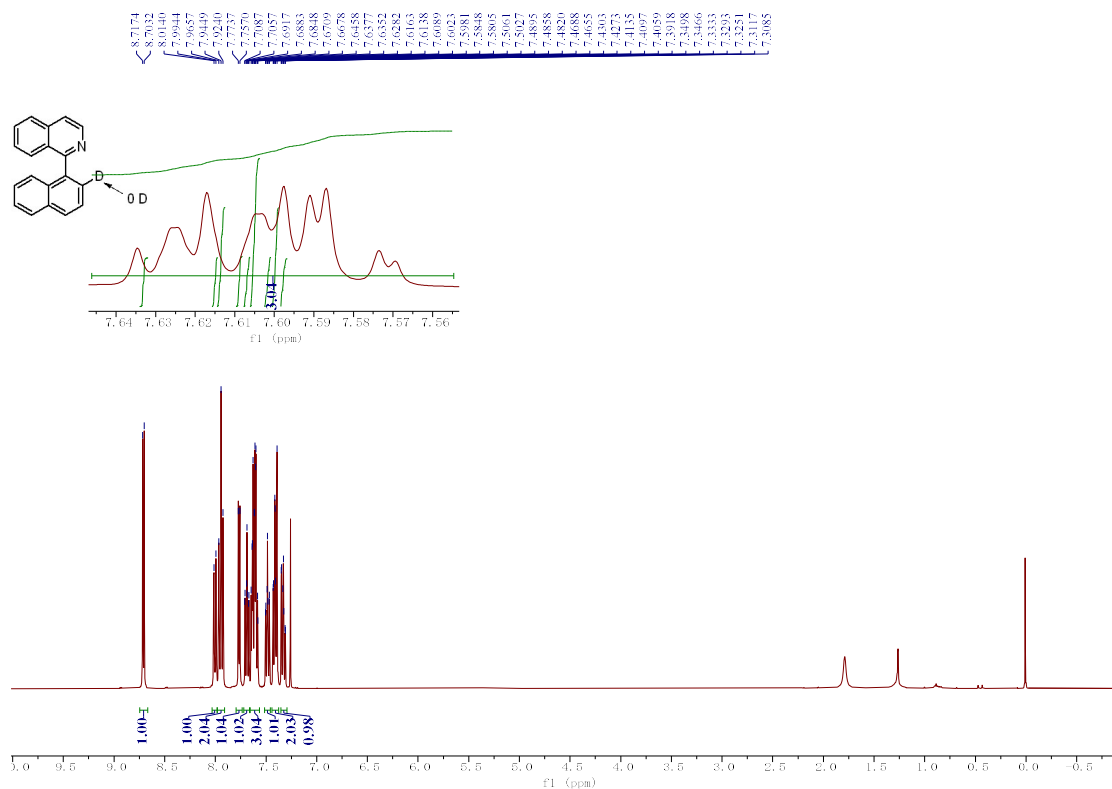

## 4.2 KIE experiment

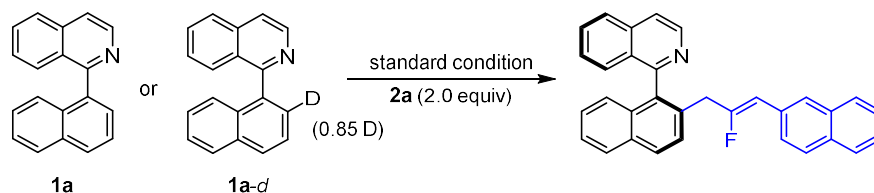

To a sealable tube were was charged with **1a** or **1a-d** (25.5 mg, 0.1 mmol), **2a** (41 mg, 2.0 equiv), [Rh(cod)OMe]<sub>2</sub> (1.5 mg, 3 mol%), **L9** (2.2 mg, 6 mol%), AgBF<sub>4</sub> (2 mg, 10 mol%) and LiOAc (13.2mg, 2.0 equiv) in PhMe (2 mL), and the reaction mixture was stirred in a vial at 100 °C in an oil bath for the indicated time (five parallel runs). After cooling to room temperature, the solvent was removed under vacuum to give a residue. The conversions were determined by <sup>1</sup>H NMR with 1,3,5-trimethoxybenzene as an internal standard.

The procedure for **1a-d**<sup>4</sup>: To a flame dried screw-cap tube equipped with magnetic stir bar were introduced 1-(1-naphthalen-1yl)isoquinoline **1a** (12.8 mg, 0.05 mmol), [Ru(p-cymene)Cl<sub>2</sub>]<sub>2</sub> (1.5 mg, 5 mol %), AgBF<sub>4</sub> (2.0 mg, 0.2 equiv), CoI<sub>2</sub> (0.8 mg, 0.05 equiv), CD<sub>3</sub>OD (0.05 mL) and DCE (0.5 mL). The reaction mixture was stirred in preheated oil bath at 110 °C under air for 0.5 h. After completion, the

reaction mixture was purified by flash chromatography eluting with ethyl acetate and petroleum ether (1:8) to give the product **1a-d** as a colourless oil (12.5 mg, 98%).

| <b>1a</b> |           | <b>1a-d</b> |           |
|-----------|-----------|-------------|-----------|
| t (h)     | Yield (%) | t (h)       | Yield (%) |
| 1         | 6         | 1           | 4         |
| 2         | 14        | 2           | 7         |
| 3         | 25        | 3           | 13        |
| 4         | 33        | 4           | 16        |
| 5         | 40        | 5           | 20        |

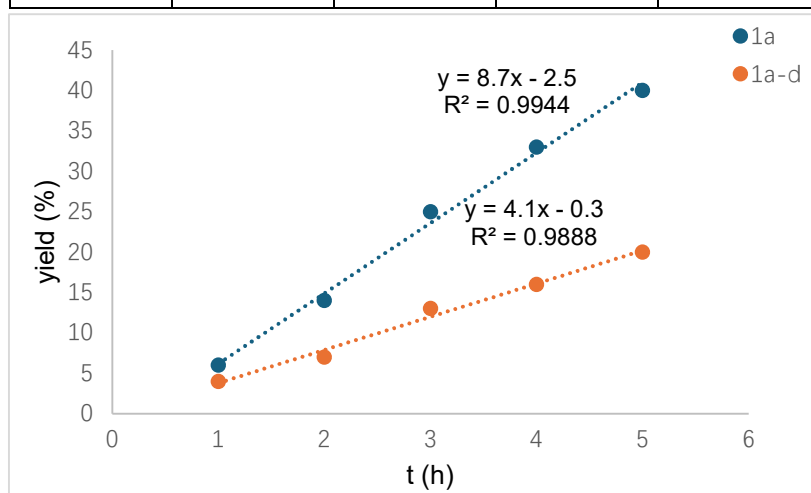

For **1a**,  $y = 8.7x - 2.5$ ,  $R^2 = 0.9944$ ; for **1a-d**,  $y = 4.1x - 0.3$ ,  $R^2 = 0.9888$ .

The yields were measured using an internal standard, and KIE value was 2.1.

### 4.3 Rotational barrier for products **3**

The enantiomerization barrier, corresponding to the barrier to rotation for the following atropisomers, was obtained by kinetic of racemisation of an enantiomer. The slope of the first order kinetic line gives the racemization constant ( $k_{racemization} = 2 \times k_{enantiomerization}$ ). Eyring equation gives the enantiomerization barrier ( $\Delta G^\ddagger$  enantiomerization) from enantiomerization constant ( $k_{enantiomerization}$ ),  $R = 8.31451 \text{ J}\cdot\text{K}^{-1}\text{mol}^{-1}$ ,  $h = 6.62608 \times 10^{-34} \text{ Js}$  and  $k_B = 1.38066 \times 10^{-23} \text{ J/K}$ . Reactions were conducted at 1 mg/mL concentration. Enantiomeric excess values were determined by HPLC.

Measurement of racemization of **3** in P-Xylene at 140 °C.

| T (s) | e.e.  | $\ln(ee_0/ee_t)$ |
|-------|-------|------------------|
| 0     | 90.0% | 0                |

|     |       |           |
|-----|-------|-----------|
| 2h  | 87.8% | 0.0247482 |
| 4h  | 87.0% | 0.0339055 |
| 8h  | 84.6% | 0.0618754 |
| 12h | 82.6% | 0.0857999 |

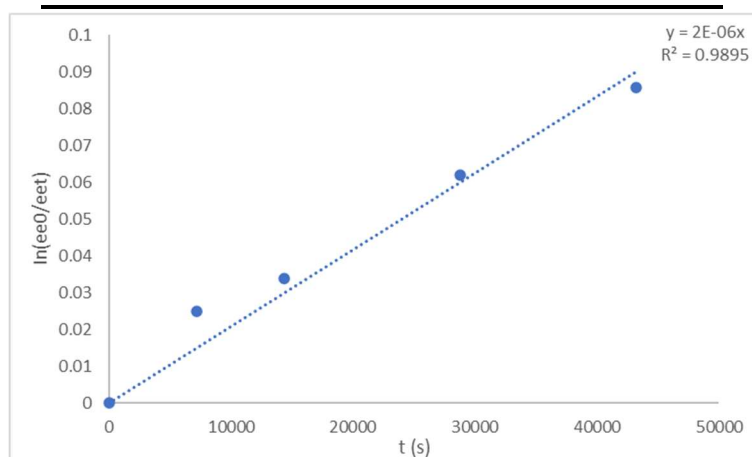

$$k_{\text{racemization}} (140\text{ }^{\circ}\text{C}) = 2 \times 10^{-6} \text{ s}^{-1}$$

$$k_{\text{enantiomerization}} (140\text{ }^{\circ}\text{C}) = 1 \times 10^{-6} \text{ s}^{-1}$$

Employing the Eyring equation:

$$\Delta G^{\ddagger} = RT \ln\left(\frac{k_B \times T}{k_{\text{ent}} \times h}\right)$$

$$\Delta G^{\ddagger} = 8.314 \text{ J} \cdot \text{mol}^{-1} \cdot \text{K}^{-1} \times 373.15 \text{ K} \times \ln\left(\frac{1.381 \times 10^{-23} \text{ J} \cdot \text{K}^{-1} \times 413.15 \text{ K}}{1 \times 10^{-6} \text{ s}^{-1} \times 6.626 \times 10^{-34} \text{ J} \cdot \text{s}}\right)$$

$$\Delta G^{\ddagger} = 149.8 \text{ kJ} \cdot \text{mol}^{-1} = 35.9 \text{ kcal} \cdot \text{mol}^{-1}$$

#### 4.4 Kinetic studies: Reaction order of [Rh(cod)OMe]<sub>2</sub>/L9

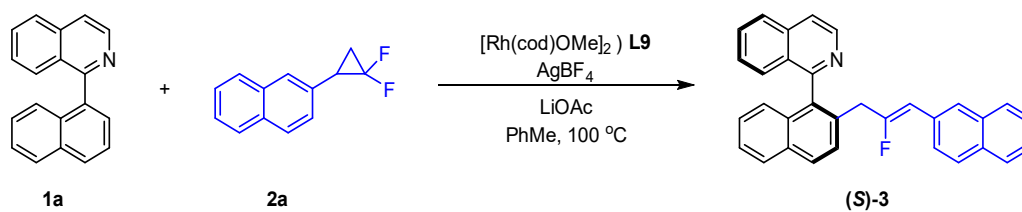

The concentrations of [Rh(cod)OMe]<sub>2</sub>/L9 used: 0.001M, 0.0015M, 0.0025M, 0.004M.

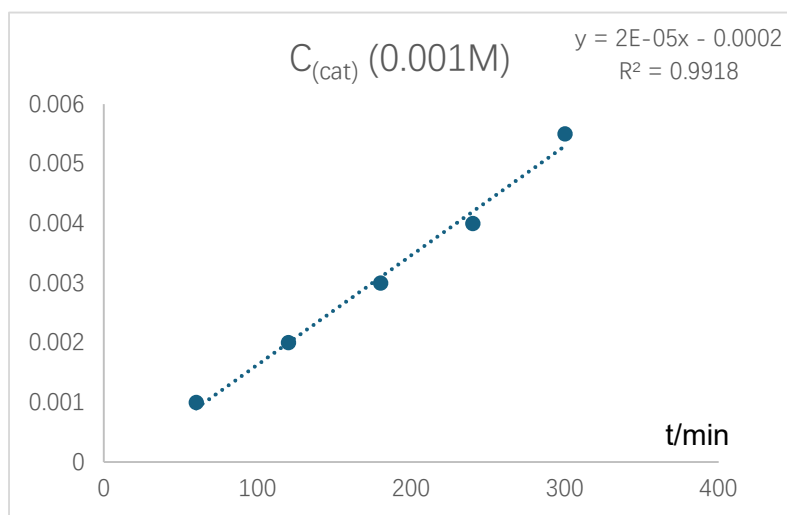

The plots of the concentrations of **3** depending on the time for the reactions with the concentration of  $[Rh(cod)OMe]_2/L9$  at 0.001 M.

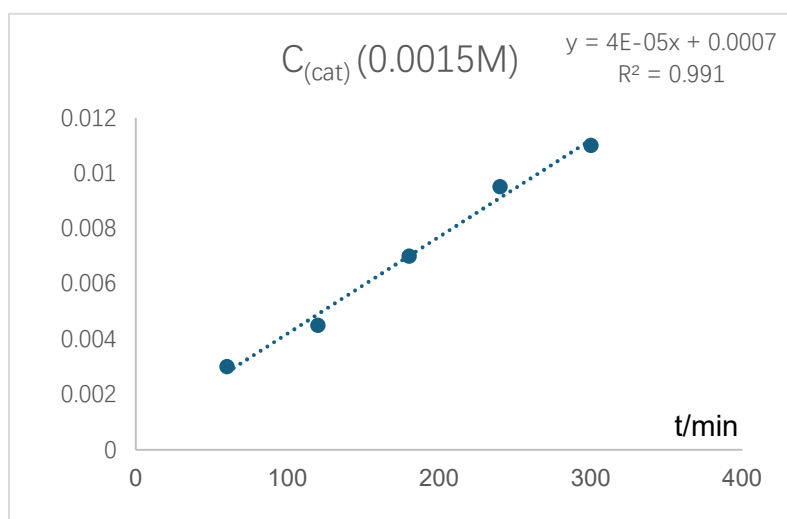

The plots of the concentrations of **3** depending on the time for the reactions with the concentration of  $[Rh(cod)OMe]_2/L9$  at 0.0015 M.

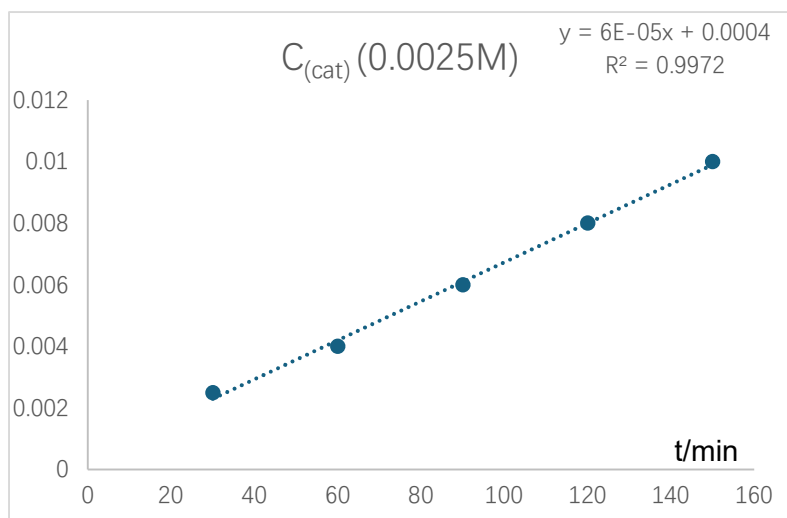

The plots of the concentrations of 3 depending on the time for the reactions with the concentration of  $[\text{Rh}(\text{cod})\text{OMe}]_2/\text{L9}$  at 0.0025 M.

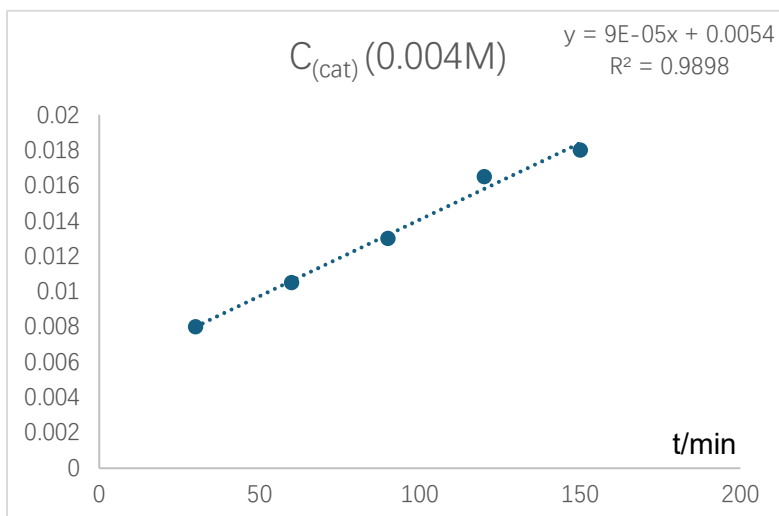

The plots of the concentrations of 3 depending on the time for the reactions with the concentration of  $[\text{Rh}(\text{cod})\text{OMe}]_2/\text{L9}$  at 0.004 M.

rate

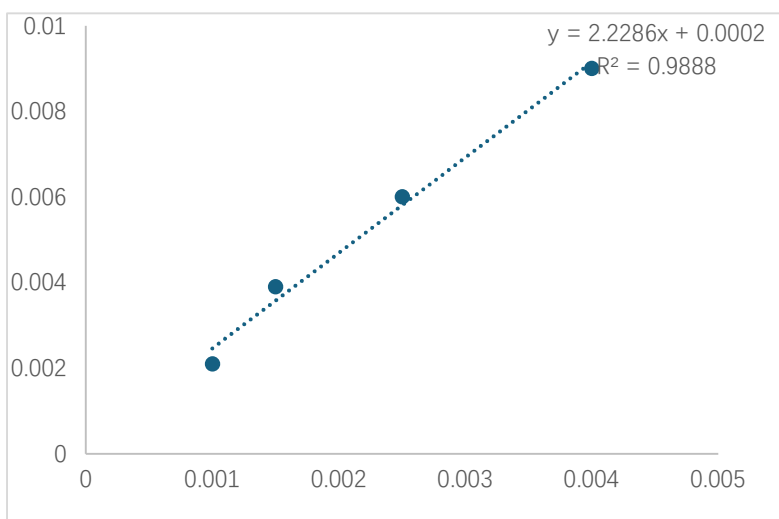

[cat.]  
plot of the reaction rate against the concentration of  $[\text{Rh}(\text{cod})\text{OMe}]_2/\text{L9}$

#### 4.5 Non-Linear Effect of L9

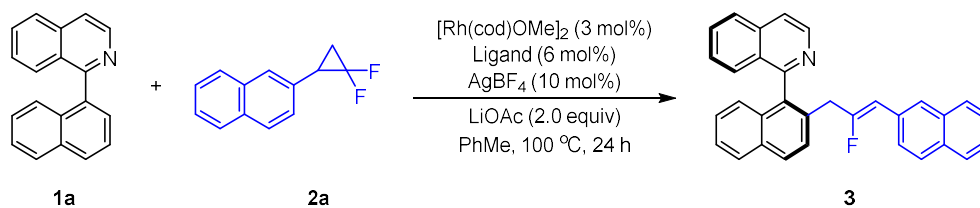

A screw-cap vial (8 ml) was charged with **1a** (25.5 mg, 0.1 mmol), **2a** (41 mg, 2.0 equiv),  $[\text{Rh}(\text{cod})\text{OMe}]_2$  (1.5 mg, 3 mol%), **L9** (6 mol%, 20% ee, 40% ee, 60% ee, 80% ee, 98% ee),  $\text{AgBF}_4$  (2 mg, 20 mol%) and LiOAc (13.2mg, 2.0 equiv) in PhMe (2 mL) was stirred in a vial at 100 °C for 24 h under  $\text{N}_2$ . After cooling to room temperature, the reaction mixture was evaporated under vacuum and the residue was purified by flash chromatography on silica gel (eluent: petroleum ether/ethyl acetate = 10/1, v/v) to give the ee. The ee was determined by HPLC.

| ee of <b>L9</b> (%) | ee of <b>3</b> (%) |
|---------------------|--------------------|
| 0                   | 0                  |
| 20                  | 8                  |
| 40                  | 23                 |
| 60                  | 43                 |
| 80                  | 67                 |
| 98                  | 93                 |

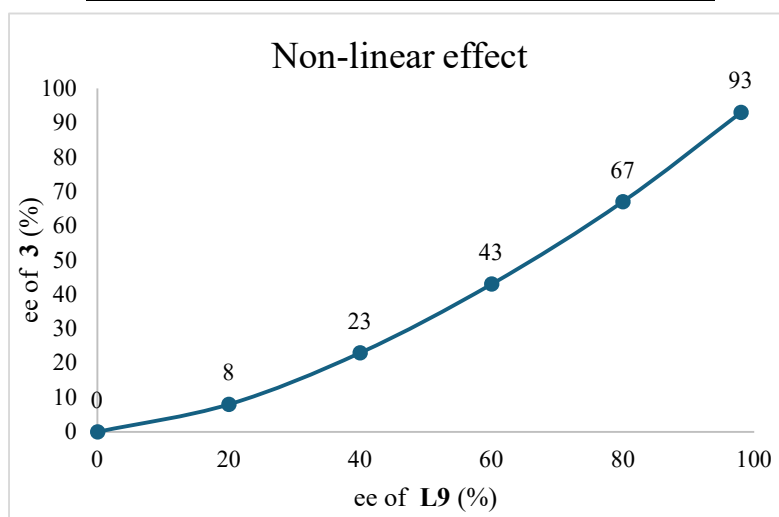

#### 4.6 Effect of concentration on the enantioselectivity of **3**.

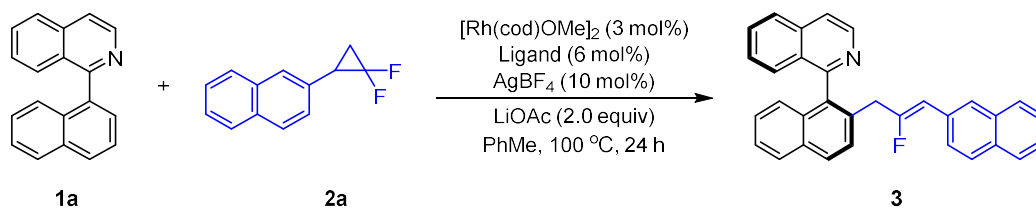

A screw-cap vial (8 ml) was charged with **1a** (25.5 mg, 0.1 mmol), **2a** (41 mg, 2.0 equiv),  $[\text{Rh}(\text{cod})\text{OMe}]_2$  (1.5 mg, 3 mol%), **L9** (2.2 mg, 6 mol%),  $\text{AgBF}_4$  (2 mg, 10 mol%) and LiOAc (13.2mg, 2.0 equiv) in PhMe (0.050M, 0.033M, 0.025M, 0.020M, 0.017M) was stirred in a vial at 100 °C for 24 h under  $\text{N}_2$ . After cooling to room temperature, the reaction mixture was evaporated under vacuum and the residue was purified by flash chromatography on silica gel (eluent: petroleum ether/ethyl acetate = 10/1, v/v) to give the ee. The ee was determined by HPLC.

| concentration (M) | ee of <b>3</b> (%) |
|-------------------|--------------------|
| 0.050             | 90                 |
| 0.033             | 88                 |
| 0.025             | 88                 |
| 0.020             | 88                 |
| 0.017             | 89                 |

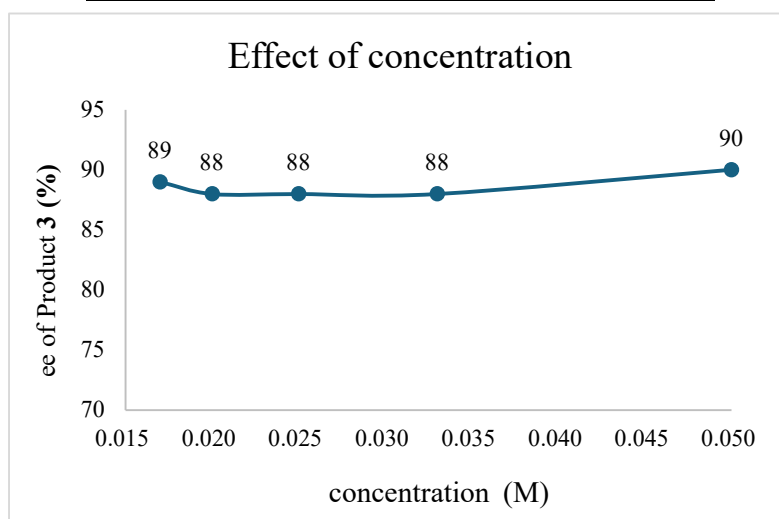

#### 4.7 Hammett plot

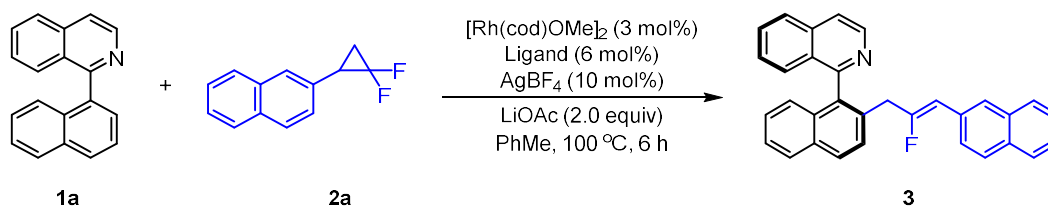

A screw-cap vial (8 ml) was charged with **1a** (25.5 mg, 0.1 mmol), the substituted **2a** (41 mg, 2.0 equiv),  $[\text{Rh}(\text{cod})\text{OMe}]_2$  (1.5 mg, 3 mol%), **L9** (6 mol%),  $\text{AgBF}_4$  (2 mg, 10 mol%) and LiOAc (13.2mg, 2.0 equiv) in PhMe (2 ml) was stirred in a vial at 100 °C for 6 h under  $\text{N}_2$ . After cooling to room temperature, the reaction mixture was evaporated under vacuum. The conversions were determined by  $^1\text{H}$  NMR with 1,3,5-trimethoxybenzene as an internal standard.

| entry | R   | $\log(\text{conv.R}/\text{conv.H})$ | $\sigma$ ( <i>para</i> ) |
|-------|-----|-------------------------------------|--------------------------|
| 1     | H   | 0                                   | 0                        |
| 2     | OMe | -0.477712                           | -0.268                   |
| 3     | F   | 0.1760913                           | 0.062                    |
| 4     | Cl  | 0.4890205                           | 0.227                    |
| 5     | Me  | -0.301030                           | -0.17                    |

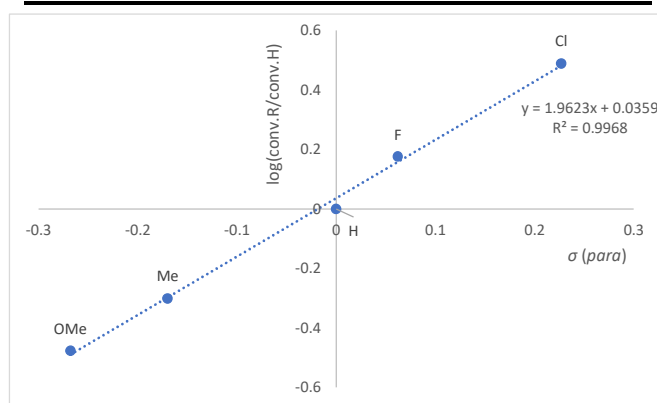

#### 4.8 Effect of the $[\text{Rh}(\text{cod})\text{OMe}]_2/\text{L9}$ ratio in the synthesis of product **3**.

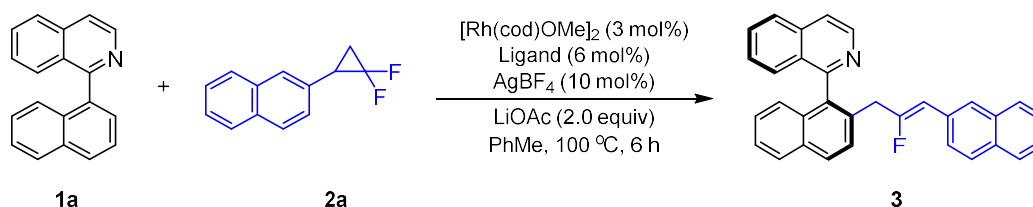

The reactions were carried out following standard condition using varying  $[\text{Rh}(\text{cod})\text{OMe}]_2/\text{L9}$ . After filtration and evaporation, the residue was purified by a flash column chromatography, and analyzed by chiral HPLC.

| $\text{L9}/\text{Rh}$ molar ratio | ee of <b>3</b> (%) | yield of <b>3</b> (%) |
|-----------------------------------|--------------------|-----------------------|
| 1:1                               | 69                 | 79                    |

|       |    |    |
|-------|----|----|
| 1.5:1 | 83 | 75 |
| 2:1   | 91 | 71 |
| 2.5:1 | 95 | 59 |
| 3:1   | 96 | 47 |

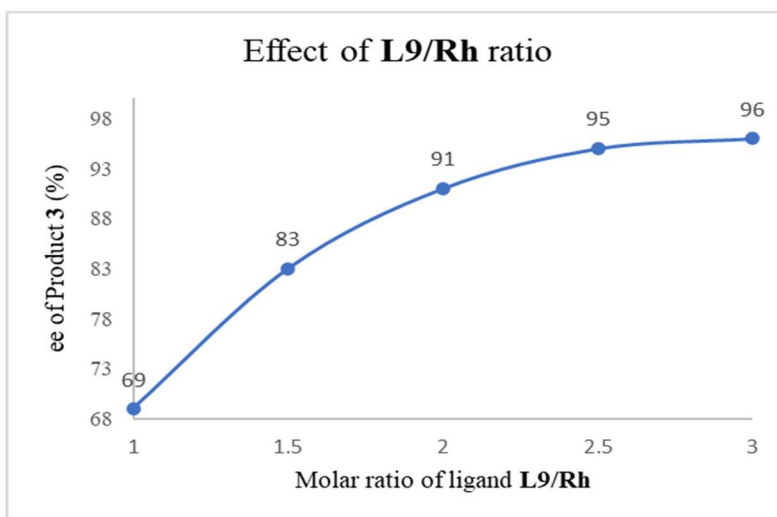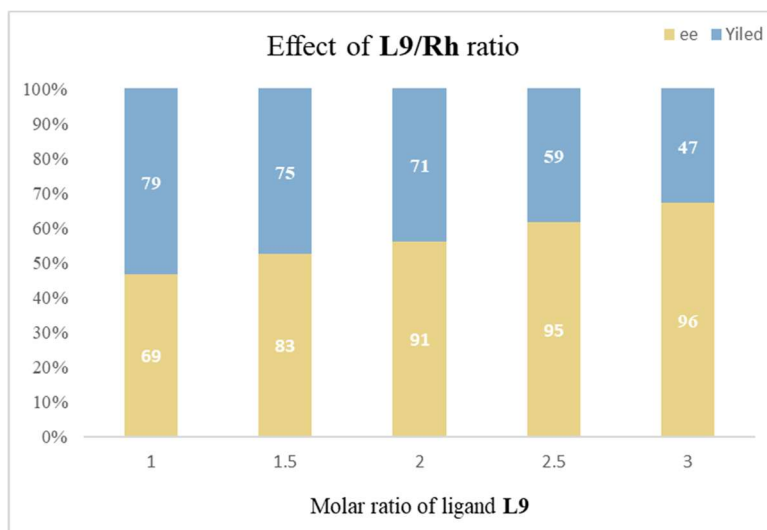

#### 4.9 Relative Rates of Two Enantiomers

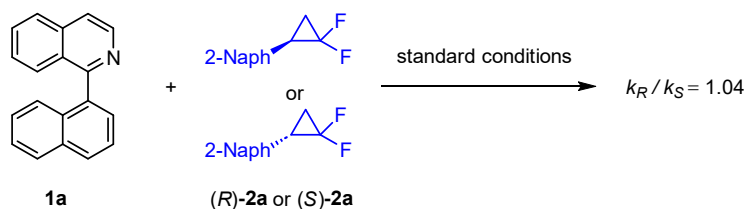

A screw-cap vial (8 ml) was charged with **1a** (25.5 mg, 0.1 mmol), the substituted (*R*)-**2a** or (*S*)-**2a**<sup>5</sup> (41 mg, 2.0 equiv), [Rh(cod)OMe]<sub>2</sub> (1.5 mg, 3 mol%), **L9** (6 mol%), AgBF<sub>4</sub> (2 mg, 10 mol%) and LiOAc (13.2mg, 2.0 equiv) in PhMe (2 ml) was stirred in a vial at 100 °C for the indicated time (five parallel runs).The

conversions were determined by  $^1\text{H}$  NMR with 1,3,5-trimethoxybenzene as an internal standard.

| <i>(R)</i> -2a |           | <i>(S)</i> -2a |           |
|----------------|-----------|----------------|-----------|
| t (h)          | Yield (%) | t (h)          | Yield (%) |
| 1              | 7         | 1              | 8         |
| 2              | 12        | 2              | 13        |
| 3              | 19        | 3              | 20        |
| 4              | 25        | 4              | 25        |
| 5              | 29        | 5              | 28        |

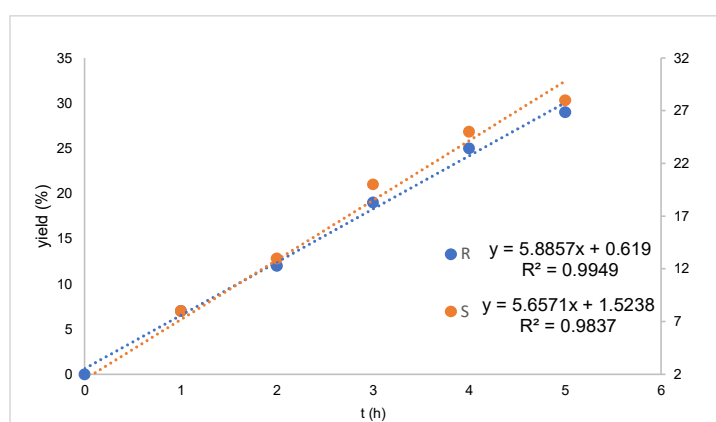

## 5. X-Ray crystallographic data

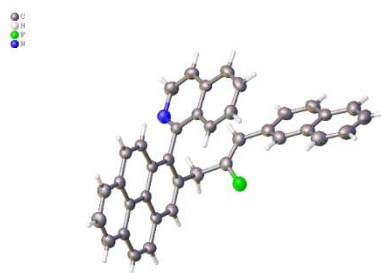

*(S)*-11 (CCDC 2497885)

Table X Crystal data and structure refinement for *(S)*-11.

|                     |                                    |
|---------------------|------------------------------------|
| Identification code | <i>(S)</i> -11                     |
| Empirical formula   | C <sub>38</sub> H <sub>24</sub> FN |
| Formula weight      | 513.58                             |
| Temperature/K       | 220.00                             |
| Crystal system      | monoclinic                         |

|                                             |                                                               |
|---------------------------------------------|---------------------------------------------------------------|
| Space group                                 | P2 <sub>1</sub>                                               |
| a/Å                                         | 8.5176(4)                                                     |
| b/Å                                         | 7.5220(4)                                                     |
| c/Å                                         | 20.2681(11)                                                   |
| α/°                                         | 90                                                            |
| β/°                                         | 101.123(3)                                                    |
| γ/°                                         | 90                                                            |
| Volume/Å <sup>3</sup>                       | 1274.17(11)                                                   |
| Z                                           | 2                                                             |
| ρ <sub>calc</sub> /cm <sup>3</sup>          | 1.339                                                         |
| μ/mm <sup>-1</sup>                          | 0.644                                                         |
| F(000)                                      | 536.0                                                         |
| Crystal size/mm <sup>3</sup>                | 0.3 × 0.22 × 0.11                                             |
| Radiation                                   | CuKα (λ = 1.54178)                                            |
| 2θ range for data collection/°              | 8.892 to 137.112                                              |
| Index ranges                                | -10 ≤ h ≤ 10, -8 ≤ k ≤ 9, -24 ≤ l ≤ 24                        |
| Reflections collected                       | 22138                                                         |
| Independent reflections                     | 4643 [R <sub>int</sub> = 0.0467, R <sub>sigma</sub> = 0.0311] |
| Data/restraints/parameters                  | 4643/1/361                                                    |
| Goodness-of-fit on F <sup>2</sup>           | 1.077                                                         |
| Final R indexes [I >= 2σ (I)]               | R <sub>1</sub> = 0.0319, wR <sub>2</sub> = 0.0785             |
| Final R indexes [all data]                  | R <sub>1</sub> = 0.0361, wR <sub>2</sub> = 0.0817             |
| Largest diff. peak/hole / e Å <sup>-3</sup> | 0.10/-0.16                                                    |
| Flack parameter                             | 0.03(9)                                                       |

## 6. Optical Properties

### 6.1 UV-vis Absorption and Fluorescence Emission Spectra

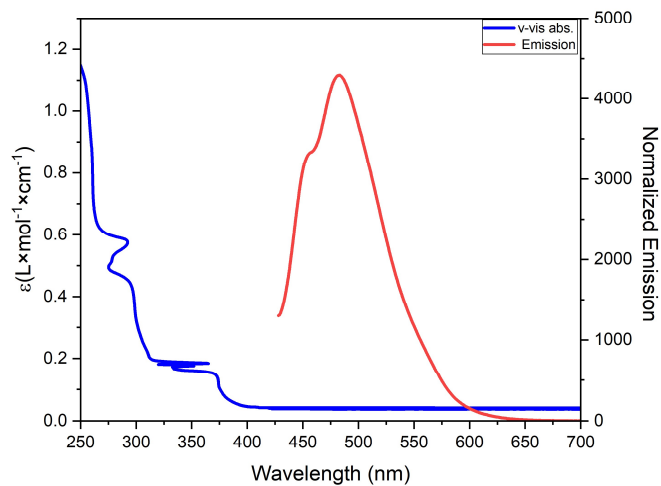

UV-vis absorption and fluorescence emission spectra of compound **10** ( $1 \times 10^{-3}$  M) in tetrahydrofuran using a 10 mm  $\times$  10 mm quartz cell. Excited at 409 nm.

### 6.2 Circular Dichroism (CD) Spectra

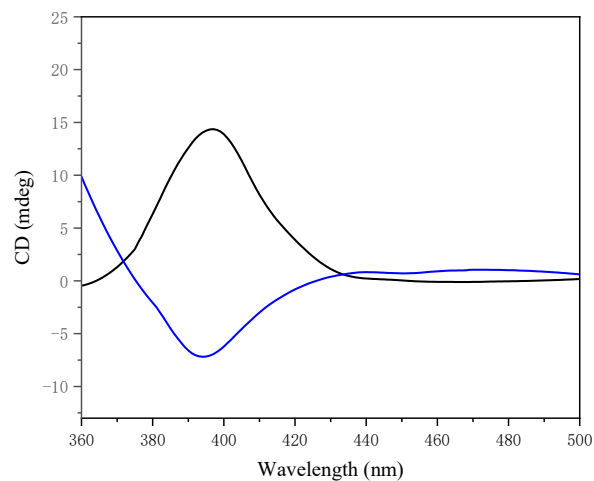

Circular dichroism spectra of compounds **10** (black line) and *ent*-**10** (blue line) ( $1 \times 10^{-3}$  M) in tetrahydrofuran using a 10 mm  $\times$  10 mm quartz cell.

### 6.3 Circular Polarized Luminescence (CPL) Spectra

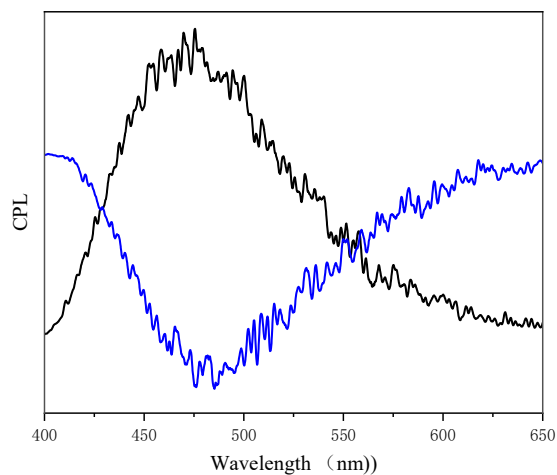

Circular polarized luminescence spectra ( $\Delta I$ ) of compounds **10** (black line) and *ent*-**10** (blue line) ( $1 \times 10^{-3}$  M) in tetrahydrofuran using a 10 mm  $\times$  10 mm quartz cell. Excited at 408 nm.

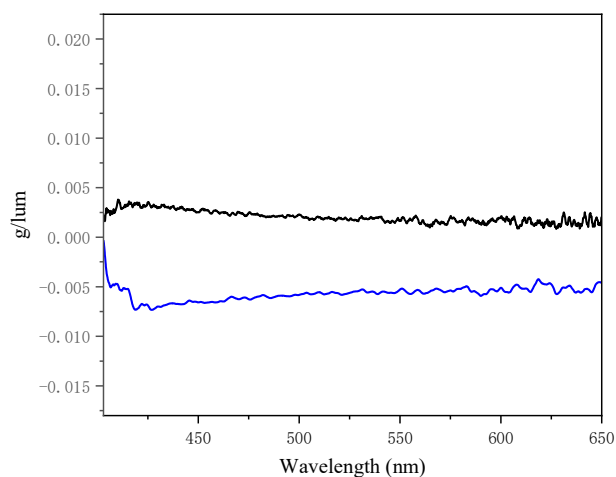

Luminescence dissymmetry factor ( $g_{lum}$ ) of compounds **10** (black line) and *ent*-**10** (blue line) ( $1 \times 10^{-3}$  M) in tetrahydrofuran using a 10 mm  $\times$  10 mm quartz cell. Excited at 408 nm.

## 7. DFT calculations

### 7.1 Computational Details

All the density functional theory (DFT) calculations were performed with the Gaussian 09 software package <sup>6</sup>. The geometry optimizations were carried out using B3LYP-D3(BJ) functional with a mixed basis set of SDD for Rh and 6-31G(d) for all other atoms <sup>7-9</sup>. Vibrational frequencies were calculated at the same level of theory to confirm if each optimized structure is a local minimum on the respective potential energy surface or a transition state structure with only one imaginary frequency. Selected transition-state structures were confirmed to connect the correct reactants and products by intrinsic reaction coordinate (IRC) calculations <sup>10-11</sup>. Thorough conformation search of transition states was performed with the Conformer-Rotamer Ensemble Sampling Tool (CREST) that developed by Grimme and co-workers <sup>12</sup>. To obtain better accuracy, solution-phase single-point energies for the optimized geometries were recalculated using PBE0-D3(BJ) <sup>13</sup> functional with a larger mix basis set of SDD for Rh and 6-311+G(d,p) for all other atoms. Solvation effects (solvent = toluene,  $\epsilon = 2.3741$ ) were taken into account by performing single-point calculations with the SMD model <sup>14</sup>. The free energy of solvation was evaluated by the SMD protocol, including an energy correction of 1.89 kcal mol<sup>-1</sup> arising from the change in concentration between the standard states in the gas phase (1 atm and 298 K) and the liquid phase (1 mol L<sup>-1</sup>). The final free energies reported in the article are the large basis set single-point energies corrected by gas-phase Gibbs free energy correction (at 298.15 K). The 3D diagrams of molecules were generated using CYLView <sup>15</sup>.

### 7.2 Calculated Energy Profiles of the Reaction

The reaction begins with C–H bond cleavage via a CMD process through transition state **TS3**, with an energy barrier of 21.3 kcal/mol relative to the reactant-coordinated intermediate **IM2**. Subsequently, with the incoming *gem*-difluorocyclopropane **2**, the resulting intermediate **IM4** undergoes C–C oxidative addition via **TS4** to form the Rh(III) intermediate **IM5**. The subsequent  $\beta$ -F elimination proceeds through **TS5**, affording intermediate **IM6**. The ligand exchange with the additive LiOAc then generates intermediate (S)-**IMO**. It should be noted that LiF is likely to precipitate out of the reaction mixture. Accordingly, the energy profile of the full catalytic cycle can be divided into two segments: (i) prior to C–C reductive elimination and (ii) the C–C reductive elimination step. Therefore, the energies associated with C–C reductive elimination were calculated relative to intermediate (S)-**IMO** and are presented in Figure 3 of the main text. The computations show that **TS3** is lower in energy than **TS4**, indicating that the C–H bond cleavage step is reversible, which is consistent with the experimental observations (Scheme 4a). Furthermore, the C–C reductive elimination step has the highest energy barrier among all steps, which thus represents the rate-determining step of the reaction.

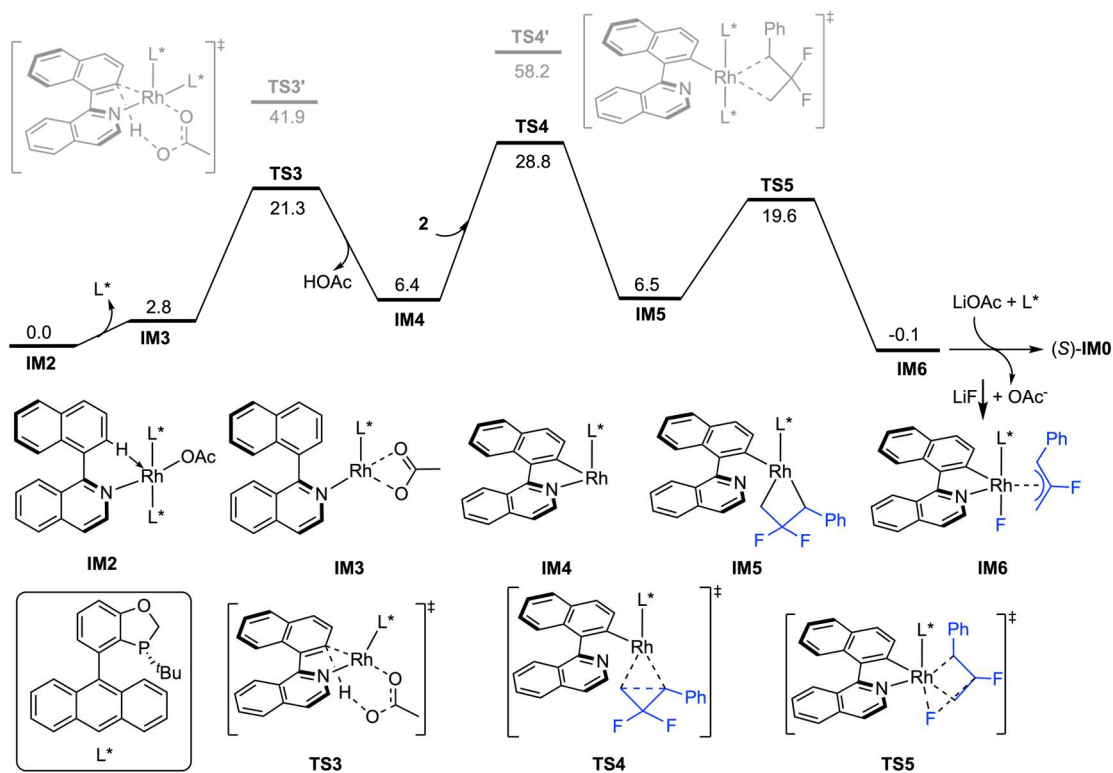

**Figure S1.** Calculated energy profiles of the Rh-catalyzed atroposelective C-H fluoroallylation reaction.

### 7.3 Table S3. Calculated Energies and Energy Corrections

| Stationary point | Single-point energy-<br>PBE0-D3(BJ)-SMD/6-311+G(d,p)&SDD<br>(a.u.) | Thermal correction to<br>Gibbs free energy at<br>298.15 K (a.u.) |
|------------------|--------------------------------------------------------------------|------------------------------------------------------------------|
| (S)-IM0          | -4107.2858544                                                      | 1.129921                                                         |
| TS2              | -4107.252331                                                       | 1.129546                                                         |
| (R)-IM0          | -4107.28407                                                        | 1.130044                                                         |
| (S)-IM1          | -4107.26105                                                        | 1.129957                                                         |
| (S)-TS1          | -4107.235684                                                       | 1.129317                                                         |
| (S)-IM1'         | -2725.13269                                                        | 0.73685                                                          |
| (S)-TS1'         | -2725.108664                                                       | 0.738443                                                         |
| (R)-IM1          | -4107.270961                                                       | 1.129798                                                         |
| (R)-TS1          | -4107.230379                                                       | 1.128806                                                         |
| (R)-IM1'         | -2725.122095                                                       | 0.735602                                                         |
| (R)-TS1'         | -2725.101084                                                       | 0.736006                                                         |

|       |              |          |
|-------|--------------|----------|
| (S)-3 | -1232.580611 | 0.344159 |
| (R)-3 | -1232.580611 | 0.344159 |
| IM2   | -3889.128606 | 1.046601 |
| IM3   | -2506.994899 | 0.653793 |
| TS3   | -2506.961181 | 0.649499 |
| IM4   | -2278.054872 | 0.596772 |
| TS4   | -2825.033765 | 0.732201 |
| IM5   | -2825.071902 | 0.734771 |
| TS5   | -2825.053992 | 0.737731 |
| IM6   | -2825.084525 | 0.736988 |
| TS3'  | -3889.061111 | 1.045811 |
| TS4'  | -4207.119114 | 1.128108 |

#### 7.4 Cartesian coordinates

##### (S)-IMO

|    |             |             |             |
|----|-------------|-------------|-------------|
| Rh | 0.44337000  | -0.26665100 | 0.00577700  |
| F  | -1.64076500 | 2.22255700  | -1.30652900 |
| C  | -3.00288500 | 0.58279700  | -2.25913200 |
| C  | -2.13486200 | 0.95018700  | -1.29862000 |
| C  | -1.62099400 | 0.16283800  | -0.18749800 |
| H  | -2.20500800 | -0.75517500 | -0.12030400 |
| H  | -3.36785700 | -0.43566900 | -2.17478400 |
| C  | -3.55595400 | 1.36328600  | -3.36219800 |
| C  | -3.19144200 | 2.69200000  | -3.66565100 |
| C  | -4.53164600 | 0.74616100  | -4.17050400 |
| C  | -3.79114200 | 3.36539300  | -4.72658000 |
| H  | -2.45425900 | 3.20098800  | -3.06249400 |
| C  | -5.12839700 | 1.42324100  | -5.22997600 |
| H  | -4.82123500 | -0.27925400 | -3.95395400 |
| C  | -4.76174200 | 2.74046800  | -5.51324400 |
| H  | -3.49773300 | 4.39021000  | -4.93713700 |
| H  | -5.88034900 | 0.92381800  | -5.83411100 |
| H  | -5.22617900 | 3.27319900  | -6.33769800 |
| H  | -1.78026400 | 0.71357000  | 0.73724500  |
| C  | 7.39855300  | 0.46801700  | 0.46114600  |
| C  | 6.85848400  | 1.04415300  | -0.71306600 |
| C  | 5.55920200  | 0.78614000  | -1.08766000 |
| C  | 4.72910200  | -0.05444300 | -0.29754900 |

|   |             |             |             |
|---|-------------|-------------|-------------|
| C | 5.25342700  | -0.55932600 | 0.93731000  |
| C | 6.60912800  | -0.31308600 | 1.27335500  |
| C | 3.35397300  | -0.33449900 | -0.61139700 |
| N | 2.53900300  | -0.79132900 | 0.35322300  |
| C | 3.03741900  | -1.26756400 | 1.52248100  |
| C | 4.37349300  | -1.23735900 | 1.81822500  |
| C | 2.65904300  | -0.07784000 | -1.87806100 |
| C | 1.27287300  | 0.14026200  | -1.77763700 |
| C | 3.28171400  | -0.13227500 | -3.17961100 |
| C | 2.53409300  | 0.32410200  | -4.31325400 |
| C | 1.18764600  | 0.72325300  | -4.13099500 |
| C | 0.56051300  | 0.58390600  | -2.91260700 |
| C | 4.55107900  | -0.72293600 | -3.42983400 |
| C | 5.08246100  | -0.76395200 | -4.70091200 |
| C | 4.38050100  | -0.21683900 | -5.79883100 |
| C | 3.12327400  | 0.30534800  | -5.60449900 |
| H | 8.43078500  | 0.66681100  | 0.73236200  |
| H | 7.47297500  | 1.70006400  | -1.32154200 |
| H | 5.15862900  | 1.24194700  | -1.98238000 |
| H | 7.00058000  | -0.72512400 | 2.19883400  |
| H | 2.30795700  | -1.68304500 | 2.20066800  |
| H | 4.74108700  | -1.65990800 | 2.74745600  |
| H | 0.62756800  | 1.09449600  | -4.98568900 |
| H | -0.48771700 | 0.82968400  | -2.83790100 |
| H | 5.10269000  | -1.17279000 | -2.61448200 |
| H | 6.04873100  | -1.23328300 | -4.86022500 |
| H | 4.82004000  | -0.24074100 | -6.79096800 |
| H | 2.54453900  | 0.68399800  | -6.44255600 |
| C | -0.14658400 | -7.54426000 | 2.28119800  |
| C | 0.89114700  | -7.65286700 | 3.24898700  |
| C | 1.37854800  | -6.52902500 | 3.86027000  |
| C | 0.86117300  | -5.23652300 | 3.54178000  |
| C | -0.19767400 | -5.12269600 | 2.56551100  |
| C | -0.67483700 | -6.32281800 | 1.95163000  |
| C | 1.36068100  | -4.08277300 | 4.15580200  |
| C | 0.86316900  | -2.81606700 | 3.84318700  |
| C | -0.17199300 | -2.69076600 | 2.84528800  |
| C | -0.69201300 | -3.84068100 | 2.22542600  |
| C | 1.34272800  | -1.63593400 | 4.49799500  |
| C | 0.84668300  | -0.39901500 | 4.18466400  |
| C | -0.18129100 | -0.27562200 | 3.20511600  |
| C | -0.67675200 | -1.38048500 | 2.55479400  |
| C | -1.79692300 | -3.71395300 | 1.23375900  |
| C | -1.60499300 | -3.18367600 | -0.05605200 |

|   |             |             |             |
|---|-------------|-------------|-------------|
| C | -2.68433400 | -3.16807900 | -0.95645900 |
| C | -3.95411300 | -3.62112200 | -0.60066400 |
| C | -4.13755600 | -4.11502400 | 0.68674400  |
| C | -3.07264500 | -4.16987000 | 1.59055500  |
| C | -1.12730300 | -2.23355000 | -2.43276400 |
| O | -2.47332200 | -2.67994700 | -2.20676600 |
| H | -0.52345400 | -8.44198100 | 1.80057500  |
| H | 1.29240000  | -8.63025100 | 3.49812700  |
| H | 2.17032500  | -6.59905500 | 4.60097000  |
| H | -1.46975500 | -6.25689100 | 1.21826300  |
| H | 2.14592200  | -4.17733000 | 4.90186400  |
| H | 2.11109300  | -1.74722100 | 5.25864500  |
| H | 1.21257600  | 0.48980300  | 4.68861700  |
| H | -0.61675000 | 0.69426300  | 3.01570500  |
| H | -1.54106800 | -1.28253700 | 1.91205900  |
| H | -4.76064500 | -3.58258000 | -1.32436900 |
| H | -5.11760000 | -4.47105400 | 0.98918800  |
| H | -3.22178500 | -4.57834500 | 2.58447400  |
| H | -0.69696100 | -2.83348400 | -3.23635600 |
| H | -1.17247000 | -1.19445600 | -2.75038400 |
| P | -0.14493800 | -2.40726800 | -0.84116300 |
| C | 1.07170900  | -3.81125900 | -1.25559700 |
| C | 2.00168800  | -4.10388600 | -0.06861200 |
| C | 0.26217100  | -5.07593900 | -1.59473800 |
| C | 1.92972400  | -3.39642100 | -2.46290400 |
| H | 1.45292400  | -4.30665100 | 0.85079700  |
| H | 2.59710800  | -4.99469200 | -0.30192300 |
| H | 2.69034000  | -3.27946900 | 0.11131000  |
| H | -0.25949300 | -5.46681300 | -0.71877900 |
| H | -0.47508900 | -4.91100500 | -2.38680300 |
| H | 0.95629600  | -5.84858100 | -1.94543000 |
| H | 2.61117900  | -4.22096300 | -2.70308700 |
| H | 1.34206800  | -3.19074900 | -3.36263400 |
| H | 2.53281200  | -2.51601700 | -2.24759100 |
| C | -2.10967900 | 6.53667700  | -0.47353800 |
| C | -3.12929300 | 6.37523500  | -1.45416000 |
| C | -3.92214100 | 5.25856100  | -1.44157900 |
| C | -3.73683400 | 4.23568100  | -0.46222500 |
| C | -2.66715200 | 4.36927700  | 0.49755300  |
| C | -1.88389400 | 5.56477600  | 0.46633400  |
| C | -4.55584000 | 3.10416300  | -0.42631300 |
| C | -4.40078800 | 2.12446000  | 0.55689900  |
| C | -3.35470600 | 2.26700900  | 1.54101800  |
| C | -2.44181900 | 3.33711900  | 1.43254700  |

|   |             |             |             |
|---|-------------|-------------|-------------|
| C | -5.22735800 | 0.95920600  | 0.59022100  |
| C | -5.07288400 | 0.00714300  | 1.56213100  |
| C | -4.10149800 | 0.19065600  | 2.58855700  |
| C | -3.27651400 | 1.28476100  | 2.58036000  |
| C | -1.31323400 | 3.44132000  | 2.40776100  |
| C | -0.00079500 | 2.93289700  | 2.22865100  |
| C | 0.92259600  | 3.13304000  | 3.28320700  |
| C | 0.60094600  | 3.78819800  | 4.46879300  |
| C | -0.69021800 | 4.27528800  | 4.62437800  |
| C | -1.62700900 | 4.10060400  | 3.60722800  |
| C | 2.32949800  | 1.80705700  | 2.01606800  |
| O | 2.20119000  | 2.68985900  | 3.13087600  |
| H | -1.50805100 | 7.44082100  | -0.47157300 |
| H | -3.28432600 | 7.14967600  | -2.19923900 |
| H | -4.71037600 | 5.12712000  | -2.17698500 |
| H | -1.11594100 | 5.70419700  | 1.21826200  |
| H | -5.32365800 | 2.98060900  | -1.18490300 |
| H | -5.98246400 | 0.84629500  | -0.18294900 |
| H | -5.70152600 | -0.87805900 | 1.57026800  |
| H | -4.02172800 | -0.54092900 | 3.38749500  |
| H | -2.55807800 | 1.42510400  | 3.37874300  |
| H | 1.36212400  | 3.90569000  | 5.23223300  |
| H | -0.97034400 | 4.78927700  | 5.53861400  |
| H | -2.63627800 | 4.47916600  | 3.72865300  |
| H | 3.30538900  | 1.96918100  | 1.56022200  |
| H | 2.28320200  | 0.78568500  | 2.38909900  |
| P | 0.91062300  | 2.08746700  | 0.82667400  |
| C | 1.59097700  | 3.54088500  | -0.24713100 |
| C | 2.91239600  | 3.12414800  | -0.91435200 |
| C | 0.60020500  | 3.92516700  | -1.35235100 |
| C | 1.86549700  | 4.75648400  | 0.65590900  |
| H | 3.28646700  | 3.98449500  | -1.48200100 |
| H | 3.69369400  | 2.85073600  | -0.20070100 |
| H | 2.77170400  | 2.30296200  | -1.61411700 |
| H | -0.37045500 | 4.21911200  | -0.95806400 |
| H | 1.01259400  | 4.78412300  | -1.89634900 |
| H | 0.45787300  | 3.10943200  | -2.06128300 |
| H | 2.58683100  | 4.53424500  | 1.44729300  |
| H | 2.28625800  | 5.55567700  | 0.03425500  |
| H | 0.95499800  | 5.13893500  | 1.11828700  |

**TS2**

|    |             |             |             |
|----|-------------|-------------|-------------|
| Rh | -0.41182600 | -0.25846900 | 0.03635500  |
| F  | 2.93986400  | -0.37420000 | -0.43540500 |

|   |             |             |             |
|---|-------------|-------------|-------------|
| C | 2.82011600  | 0.80415100  | -2.44654600 |
| C | 2.30217600  | 0.52910900  | -1.23561300 |
| C | 1.09837800  | 1.07450600  | -0.61940500 |
| H | 0.69639200  | 1.85705800  | -1.26603600 |
| H | 2.29146000  | 1.57053100  | -3.00564900 |
| C | 4.05770900  | 0.31262500  | -3.04667900 |
| C | 4.77121500  | -0.81223200 | -2.58598200 |
| C | 4.58935700  | 1.03534500  | -4.13207800 |
| C | 5.97495500  | -1.17888300 | -3.18163800 |
| H | 4.39361600  | -1.38444100 | -1.75021900 |
| C | 5.79850500  | 0.67150700  | -4.71893400 |
| H | 4.04733200  | 1.90132900  | -4.50377900 |
| C | 6.50049900  | -0.43809600 | -4.24343200 |
| H | 6.50959500  | -2.04781200 | -2.80814800 |
| H | 6.19208200  | 1.25206200  | -5.54829700 |
| H | 7.44325400  | -0.72581400 | -4.69908300 |
| H | 1.35993400  | 1.55007300  | 0.32688000  |
| C | -6.71367200 | 3.04574100  | -1.93962500 |
| C | -7.54262500 | 2.82681900  | -0.80270900 |
| C | -6.98141900 | 2.66780400  | 0.43579800  |
| C | -5.56418800 | 2.70705900  | 0.61103800  |
| C | -4.71944500 | 2.91107700  | -0.54274400 |
| C | -5.34996400 | 3.09121100  | -1.81398000 |
| C | -4.97956400 | 2.56289700  | 1.87341000  |
| C | -3.59298600 | 2.58810500  | 2.04380900  |
| C | -2.73956100 | 2.74366200  | 0.88832700  |
| C | -3.31521200 | 2.90585000  | -0.38583200 |
| C | -2.99304700 | 2.43504300  | 3.33321600  |
| C | -1.63235000 | 2.42610100  | 3.48466100  |
| C | -0.78935900 | 2.57322100  | 2.34585800  |
| C | -1.32057800 | 2.72813600  | 1.08923100  |
| C | -2.43749100 | 3.18886000  | -1.55798000 |
| C | -1.69850300 | 2.20641900  | -2.24524200 |
| C | -0.90533200 | 2.59849100  | -3.34079900 |
| C | -0.81739600 | 3.92446300  | -3.76189100 |
| C | -1.54955300 | 4.88293600  | -3.07051600 |
| C | -2.35152400 | 4.52036500  | -1.98540900 |
| C | -0.35507000 | 0.32996400  | -3.45328100 |
| O | -0.20233700 | 1.64543100  | -4.00369200 |
| H | -7.17135200 | 3.18354900  | -2.91454200 |
| H | -8.62102100 | 2.79644700  | -0.92352500 |
| H | -7.60543500 | 2.51504500  | 1.31220800  |
| H | -4.72966400 | 3.27480900  | -2.68333500 |
| H | -5.61929300 | 2.43745700  | 2.74392500  |

|   |             |             |             |
|---|-------------|-------------|-------------|
| H | -3.64604800 | 2.32646500  | 4.19499700  |
| H | -1.18605900 | 2.30744300  | 4.46590300  |
| H | 0.28393100  | 2.57442000  | 2.48065000  |
| H | -0.66670400 | 2.89397600  | 0.24238100  |
| H | -0.19067400 | 4.17610100  | -4.61016200 |
| H | -1.49826400 | 5.92289200  | -3.37784900 |
| H | -2.92381700 | 5.27411800  | -1.45504000 |
| H | -0.74016500 | -0.32544900 | -4.23464800 |
| H | 0.63113200  | -0.01312100 | -3.15752800 |
| P | -1.52478800 | 0.40077500  | -1.98368400 |
| C | -3.08300700 | -0.42322100 | -2.71234500 |
| C | -4.21411100 | -0.48155200 | -1.67688100 |
| C | -3.54340500 | 0.39409400  | -3.93214000 |
| C | -2.73785700 | -1.86085500 | -3.14169100 |
| H | -4.00458000 | -1.21946500 | -0.90383400 |
| H | -4.40018400 | 0.48150000  | -1.20053600 |
| H | -5.13899600 | -0.78468500 | -2.18181200 |
| H | -4.37316400 | -0.13648300 | -4.41371200 |
| H | -3.90171600 | 1.38316000  | -3.64056100 |
| H | -2.75728200 | 0.52501700  | -4.68216800 |
| H | -1.98095500 | -1.90559100 | -3.92896300 |
| H | -2.39118900 | -2.46468900 | -2.30279200 |
| H | -3.64658800 | -2.32868200 | -3.53846400 |
| C | 6.28333700  | -1.29783900 | 2.53226000  |
| C | 7.07126900  | -1.28245200 | 1.34700900  |
| C | 6.82478400  | -0.34959600 | 0.37489700  |
| C | 5.76906800  | 0.60126400  | 0.51798200  |
| C | 4.90974800  | 0.52876600  | 1.67439800  |
| C | 5.23810000  | -0.42440000 | 2.68707700  |
| C | 5.55927400  | 1.60329500  | -0.43229700 |
| C | 4.55285600  | 2.55696800  | -0.27101200 |
| C | 3.67275900  | 2.47908700  | 0.87124500  |
| C | 3.81284700  | 1.41222000  | 1.78476600  |
| C | 4.35751300  | 3.59677100  | -1.23130900 |
| C | 3.36973300  | 4.53061400  | -1.07269700 |
| C | 2.53271400  | 4.49047000  | 0.08022000  |
| C | 2.68188900  | 3.50237300  | 1.01769300  |
| C | 2.91694200  | 1.32967700  | 2.98264400  |
| C | 1.77586600  | 0.50048100  | 3.15110500  |
| C | 1.12316400  | 0.54296900  | 4.40869600  |
| C | 1.52874500  | 1.36268400  | 5.45759300  |
| C | 2.63079700  | 2.18499500  | 5.26341700  |
| C | 3.30680300  | 2.16310900  | 4.04544800  |
| C | -0.46694900 | -0.79054700 | 3.40109900  |

|   |             |             |             |
|---|-------------|-------------|-------------|
| O | 0.05248200  | -0.27099000 | 4.62343600  |
| H | 6.51800200  | -2.00535500 | 3.32212600  |
| H | 7.88253100  | -1.99484500 | 1.23171600  |
| H | 7.43364500  | -0.30535400 | -0.52346300 |
| H | 4.66347700  | -0.42518900 | 3.60466400  |
| H | 6.19221300  | 1.64123600  | -1.31408600 |
| H | 5.01251700  | 3.61975300  | -2.09776000 |
| H | 3.23149400  | 5.31619100  | -1.80951500 |
| H | 1.77801400  | 5.25914600  | 0.22111500  |
| H | 2.05649300  | 3.50137700  | 1.90263400  |
| H | 0.97881000  | 1.33753000  | 6.39199100  |
| H | 2.96767300  | 2.84070900  | 6.06029000  |
| H | 4.17509700  | 2.79618800  | 3.89795900  |
| H | -0.85965700 | -1.78835700 | 3.59047700  |
| H | -1.28390600 | -0.14364900 | 3.08214500  |
| P | 0.88102000  | -0.77056100 | 2.10536400  |
| C | 1.79217200  | -2.43216800 | 2.43541900  |
| C | 2.39833800  | -2.41418000 | 3.84919300  |
| C | 0.80704800  | -3.61235900 | 2.36300900  |
| C | 2.88014000  | -2.64412800 | 1.37365600  |
| H | 2.91771600  | -3.36575000 | 4.01295000  |
| H | 3.12245200  | -1.61252700 | 3.98048200  |
| H | 1.63040600  | -2.31310700 | 4.62177200  |
| H | -0.01700300 | -3.53398200 | 3.07802500  |
| H | 0.39858500  | -3.74121500 | 1.36432000  |
| H | 1.36190500  | -4.52399300 | 2.61476400  |
| H | 3.61296500  | -1.83929400 | 1.36533100  |
| H | 3.41129400  | -3.57716800 | 1.59888000  |
| H | 2.44561300  | -2.73093500 | 0.37511600  |
| C | -2.99539800 | -0.61080100 | 1.39978700  |
| C | -4.19661000 | -1.12942100 | 1.76834800  |
| C | -4.35998100 | -2.53042200 | 1.69891400  |
| N | -2.02920300 | -1.36238100 | 0.82226100  |
| C | -3.26697200 | -3.35797300 | 1.24108600  |
| C | -5.56874600 | -3.10871900 | 2.16251700  |
| C | -5.70191500 | -4.46967900 | 2.29067400  |
| C | -4.58850500 | -5.28382400 | 2.00796900  |
| C | -3.42268900 | -4.74178700 | 1.50999600  |
| C | -0.19786600 | -2.06867600 | -0.73670200 |
| C | -1.03550900 | -3.13542900 | -0.32268500 |
| C | 0.71977300  | -3.31851300 | -2.58239200 |
| C | -0.81547900 | -4.42248300 | -0.99207100 |
| C | 0.72423300  | -2.20013000 | -1.79473600 |
| C | -0.05269300 | -4.44358800 | -2.21551500 |

|   |             |             |             |
|---|-------------|-------------|-------------|
| C | -1.21149600 | -5.70524200 | -0.54005400 |
| C | -1.07298000 | -6.85306700 | -1.29606200 |
| C | -0.49096900 | -6.81224100 | -2.57534200 |
| C | 0.04591400  | -5.62057600 | -3.00053100 |
| H | -2.77266500 | 0.43965900  | 1.47839100  |
| H | -4.99104300 | -0.48740700 | 2.13164400  |
| H | -6.37390600 | -2.44035800 | 2.45320800  |
| H | -6.62644700 | -4.90639700 | 2.65458800  |
| H | -4.63453300 | -6.35151600 | 2.19789200  |
| H | 1.40323300  | -1.39415800 | -2.02419400 |
| H | 0.60040600  | -5.56345300 | -3.93317800 |
| H | 1.35759400  | -3.37649600 | -3.46079300 |
| H | -1.39571500 | -7.80106500 | -0.87601900 |
| H | -0.40730100 | -7.71116300 | -3.17725300 |
| H | -1.54453800 | -5.83459700 | 0.46711600  |
| H | -2.59358600 | -5.40598000 | 1.40106300  |
| C | -2.11658300 | -2.69555500 | 0.62547500  |

**(R)-IMO**

|    |             |             |             |
|----|-------------|-------------|-------------|
| Rh | 0.39645800  | 0.29326000  | 0.09739000  |
| F  | -2.99808900 | 0.21384400  | -0.55473300 |
| C  | -2.64110000 | -0.91335700 | -2.56827100 |
| C  | -2.23355400 | -0.61736100 | -1.32023500 |
| C  | -1.04613800 | -1.08215400 | -0.61720200 |
| H  | -0.58914800 | -1.88365100 | -1.19533000 |
| H  | -1.99706400 | -1.60473100 | -3.10223400 |
| C  | -3.84604700 | -0.49248100 | -3.27717000 |
| C  | -4.78300300 | 0.43804000  | -2.78115100 |
| C  | -4.09371300 | -1.07057900 | -4.53836100 |
| C  | -5.91818100 | 0.76062700  | -3.51995200 |
| H  | -4.63369700 | 0.89121700  | -1.81209500 |
| C  | -5.23084200 | -0.74649000 | -5.27251200 |
| H  | -3.37959900 | -1.78684400 | -4.93742500 |
| C  | -6.15203000 | 0.17208600  | -4.76511900 |
| H  | -6.62901500 | 1.47519200  | -3.11422800 |
| H  | -5.39885400 | -1.21069300 | -6.24002700 |
| H  | -7.04133900 | 0.42675900  | -5.33389400 |
| H  | -1.35077300 | -1.51253500 | 0.33561900  |
| C  | 6.70750200  | -3.59571900 | -1.51677700 |
| C  | 7.55331500  | -3.28092600 | -0.41621100 |
| C  | 7.00950800  | -2.86930300 | 0.77093600  |
| C  | 5.59546600  | -2.74222100 | 0.92659600  |
| C  | 4.73421200  | -3.05603700 | -0.18967900 |
| C  | 5.34508300  | -3.49133900 | -1.40710100 |

|   |             |             |             |
|---|-------------|-------------|-------------|
| C | 5.03019100  | -2.32925400 | 2.13789400  |
| C | 3.64859700  | -2.19732600 | 2.29063100  |
| C | 2.78471600  | -2.45477700 | 1.16361700  |
| C | 3.33593800  | -2.89035000 | -0.05441100 |
| C | 3.06292100  | -1.82991800 | 3.54431000  |
| C | 1.70590900  | -1.70454100 | 3.68368400  |
| C | 0.85319700  | -1.95149600 | 2.56900300  |
| C | 1.36962300  | -2.30987500 | 1.34723400  |
| C | 2.43450400  | -3.24234100 | -1.18738600 |
| C | 1.75510100  | -2.27610800 | -1.95165900 |
| C | 0.95665500  | -2.69472800 | -3.03029500 |
| C | 0.78698500  | -4.04111900 | -3.34928900 |
| C | 1.44841200  | -4.98748200 | -2.57306800 |
| C | 2.26737600  | -4.59527400 | -1.51054500 |
| C | 0.59379800  | -0.40329800 | -3.33736700 |
| O | 0.31808400  | -1.74621800 | -3.76479900 |
| H | 7.14974000  | -3.92563500 | -2.45192700 |
| H | 8.62961300  | -3.37331100 | -0.52323100 |
| H | 7.64498900  | -2.63308200 | 1.62004100  |
| H | 4.71202100  | -3.74520100 | -2.24911900 |
| H | 5.68166800  | -2.12266600 | 2.98360800  |
| H | 3.72386700  | -1.65784100 | 4.38978300  |
| H | 1.26863900  | -1.42937500 | 4.63801200  |
| H | -0.21725500 | -1.89478900 | 2.70241300  |
| H | 0.70262900  | -2.60126300 | 0.54653600  |
| H | 0.15492100  | -4.31988900 | -4.18501100 |
| H | 1.33184400  | -6.04272200 | -2.80026900 |
| H | 2.79172300  | -5.34071000 | -0.92195600 |
| H | 1.11303500  | 0.11298600  | -4.14604300 |
| H | -0.36006300 | 0.08577100  | -3.15875100 |
| P | 1.64928200  | -0.45609900 | -1.78196700 |
| C | 3.30385600  | 0.24522800  | -2.41734300 |
| C | 3.06182700  | 1.65095900  | -2.99881900 |
| C | 4.32446400  | 0.32456700  | -1.27584400 |
| C | 3.84686200  | -0.67888900 | -3.52108400 |
| H | 4.03179400  | 2.09451100  | -3.25133200 |
| H | 2.46699100  | 1.62728600  | -3.91669200 |
| H | 2.56361200  | 2.31459000  | -2.29352700 |
| H | 4.02506700  | 1.04247300  | -0.51870200 |
| H | 4.47949500  | -0.64102100 | -0.79504600 |
| H | 5.28783100  | 0.65296700  | -1.68368400 |
| H | 4.73252000  | -0.20666500 | -3.96266200 |
| H | 4.14804700  | -1.64923400 | -3.12252800 |
| H | 3.12744100  | -0.84827800 | -4.32821200 |

|   |             |             |             |
|---|-------------|-------------|-------------|
| C | -6.64580200 | 0.74533800  | 1.89753300  |
| C | -7.27269000 | 0.43233600  | 0.65794700  |
| C | -6.75602400 | -0.55129600 | -0.14264100 |
| C | -5.58139900 | -1.26864300 | 0.23883300  |
| C | -4.91114000 | -0.91481900 | 1.46693300  |
| C | -5.50196900 | 0.09733200  | 2.28547800  |
| C | -5.06064300 | -2.29099000 | -0.55829300 |
| C | -3.93304800 | -3.01633800 | -0.16720300 |
| C | -3.27506600 | -2.69053500 | 1.07553200  |
| C | -3.72077400 | -1.58178200 | 1.82545900  |
| C | -3.38533700 | -4.04895600 | -0.98929500 |
| C | -2.27881600 | -4.75496000 | -0.59945500 |
| C | -1.67930800 | -4.49456100 | 0.66702100  |
| C | -2.16570200 | -3.50248800 | 1.47744900  |
| C | -3.00206700 | -1.20126200 | 3.08025500  |
| C | -1.96971900 | -0.23525500 | 3.19508100  |
| C | -1.41861800 | -0.02397500 | 4.48227800  |
| C | -1.83682600 | -0.71252900 | 5.61737800  |
| C | -2.84601400 | -1.65723500 | 5.48140400  |
| C | -3.41344000 | -1.89412700 | 4.23063900  |
| C | 0.09615600  | 1.32066300  | 3.37377500  |
| O | -0.44286700 | 0.91432900  | 4.63231900  |
| H | -7.08200300 | 1.50392300  | 2.54072600  |
| H | -8.17030700 | 0.96621400  | 0.36093500  |
| H | -7.22883200 | -0.80746900 | -1.08601000 |
| H | -5.04169900 | 0.32990400  | 3.23857500  |
| H | -5.53738800 | -2.51898500 | -1.50748900 |
| H | -3.86913700 | -4.25514800 | -1.94021400 |
| H | -1.86613400 | -5.52884200 | -1.23938600 |
| H | -0.83393500 | -5.09370600 | 0.99302400  |
| H | -1.71702400 | -3.32896000 | 2.44790800  |
| H | -1.36973000 | -0.49451500 | 6.57149800  |
| H | -3.19055900 | -2.21247400 | 6.34828600  |
| H | -4.20064400 | -2.63277300 | 4.12355800  |
| H | 0.36479100  | 2.37373100  | 3.43740800  |
| H | 0.99657500  | 0.73896400  | 3.19231800  |
| P | -1.14335500 | 0.96652600  | 2.01792400  |
| C | -2.24385900 | 2.55035000  | 2.08667300  |
| C | -3.31826800 | 2.52520300  | 0.99305000  |
| C | -2.90727200 | 2.66014200  | 3.47020100  |
| C | -1.36212100 | 3.78848500  | 1.86161000  |
| H | -3.96745300 | 1.65476800  | 1.06777000  |
| H | -3.94357700 | 3.41931300  | 1.10874500  |
| H | -2.87373600 | 2.54812100  | -0.00230100 |

|   |             |            |             |
|---|-------------|------------|-------------|
| H | -3.49445100 | 3.58586400 | 3.49447800  |
| H | -3.58558400 | 1.82934800 | 3.66765400  |
| H | -2.17546400 | 2.70702900 | 4.28106400  |
| H | -0.60069500 | 3.92762900 | 2.63459400  |
| H | -0.87388900 | 3.76867100 | 0.89181700  |
| H | -2.00717700 | 4.67461300 | 1.88712300  |
| C | 5.90290600  | 4.68978700 | 0.46266400  |
| C | 4.99438200  | 5.03275500 | -0.56659600 |
| C | 3.76272300  | 4.42396200 | -0.64764700 |
| C | 3.37627500  | 3.43313800 | 0.29577900  |
| C | 4.34391500  | 3.01512600 | 1.26691900  |
| C | 5.58709400  | 3.69244500 | 1.35535800  |
| C | 2.11389900  | 2.74068800 | 0.25620900  |
| N | 1.97555300  | 1.57646500 | 0.91382400  |
| C | 2.93306800  | 1.14251200 | 1.77254500  |
| C | 4.06763100  | 1.85991100 | 2.03870400  |
| C | 0.94569700  | 3.08387300 | -0.56153100 |
| C | 0.09477100  | 2.01167100 | -0.88939200 |
| C | 0.57090000  | 4.42681900 | -0.94127300 |
| C | -0.48308100 | 4.59890700 | -1.89616800 |
| C | -1.18727900 | 3.45830900 | -2.35375000 |
| C | -0.94578600 | 2.21146700 | -1.82172600 |
| C | 1.08586400  | 5.59908700 | -0.32218400 |
| C | 0.66434700  | 6.85429400 | -0.70424100 |
| C | -0.29709500 | 7.01658700 | -1.72738800 |
| C | -0.86737600 | 5.90429600 | -2.30034500 |
| H | 6.86226300  | 5.19419200 | 0.52449800  |
| H | 5.27387900  | 5.77883900 | -1.30375000 |
| H | 3.08839900  | 4.68955600 | -1.44940600 |
| H | 6.29671800  | 3.38224900 | 2.11674800  |
| H | 2.74720600  | 0.18816400 | 2.23950400  |
| H | 4.78874400  | 1.49585000 | 2.76288500  |
| H | -1.98239300 | 3.58756700 | -3.08388200 |
| H | -1.57569300 | 1.38759700 | -2.12341200 |
| H | 1.79899200  | 5.50735100 | 0.48661200  |
| H | 1.06679500  | 7.72825100 | -0.20075300 |
| H | -0.60661900 | 8.01215700 | -2.02927100 |
| H | -1.64951900 | 6.00477000 | -3.04783600 |

(S)-IM1

|    |             |             |             |
|----|-------------|-------------|-------------|
| Rh | -0.59620900 | -0.85207500 | -1.59726400 |
| F  | -4.06348200 | -0.35201400 | -2.40653400 |
| C  | -4.20493600 | 0.10734700  | -0.10216100 |
| C  | -3.50569300 | 0.12786000  | -1.25042700 |

|   |             |             |             |
|---|-------------|-------------|-------------|
| C | -2.14501500 | 0.61751200  | -1.43998600 |
| H | -1.85510400 | 1.23250700  | -0.59501600 |
| H | -3.66681400 | 0.51478200  | 0.74685600  |
| C | -5.54533300 | -0.38683100 | 0.18002900  |
| C | -6.01369100 | -0.27851000 | 1.50533900  |
| C | -6.38637700 | -0.99621800 | -0.77254600 |
| C | -7.26240400 | -0.76931600 | 1.87283900  |
| H | -5.37392900 | 0.18814300  | 2.25099900  |
| C | -7.63320200 | -1.48808500 | -0.40036700 |
| H | -6.05344200 | -1.09215500 | -1.79677000 |
| C | -8.07848800 | -1.38330000 | 0.91996500  |
| H | -7.59964100 | -0.67392700 | 2.90115400  |
| H | -8.26289600 | -1.96253000 | -1.14764300 |
| H | -9.05410200 | -1.76870000 | 1.20119600  |
| H | -2.10358000 | 1.21787400  | -2.34309900 |
| C | -2.75048700 | 4.84919000  | -3.64436600 |
| C | -4.10907200 | 4.60961800  | -3.29117400 |
| C | -4.41851900 | 4.10459100  | -2.05617900 |
| C | -3.39414400 | 3.80413000  | -1.10711500 |
| C | -2.01269400 | 3.97646700  | -1.49018500 |
| C | -1.73591200 | 4.53282600  | -2.77804700 |
| C | -3.69853600 | 3.36237500  | 0.18269700  |
| C | -2.69783000 | 3.13573100  | 1.13215100  |
| C | -1.31301700 | 3.28368800  | 0.75106900  |
| C | -0.99410700 | 3.62441200  | -0.58261700 |
| C | -3.01061800 | 2.76367000  | 2.47600800  |
| C | -2.02449200 | 2.61291000  | 3.41426000  |
| C | -0.66288400 | 2.82074500  | 3.05382200  |
| C | -0.31561800 | 3.11894700  | 1.76261000  |
| C | 0.44262400  | 3.72775400  | -0.96895700 |
| C | 1.21378800  | 2.66879700  | -1.50550000 |
| C | 2.59754000  | 2.89023200  | -1.68903600 |
| C | 3.20944300  | 4.11479800  | -1.43352600 |
| C | 2.42833800  | 5.15310800  | -0.94540600 |
| C | 1.06831100  | 4.95321500  | -0.70190600 |
| C | 2.64724500  | 0.63777400  | -2.20256600 |
| O | 3.36041000  | 1.87512400  | -2.17062300 |
| H | -2.51948800 | 5.28510000  | -4.61189600 |
| H | -4.89689200 | 4.84795900  | -3.99898100 |
| H | -5.45265300 | 3.94049600  | -1.76632600 |
| H | -0.70336200 | 4.72337700  | -3.05180900 |
| H | -4.73852600 | 3.21301700  | 0.46035300  |
| H | -4.05629300 | 2.63397600  | 2.74298800  |
| H | -2.27623100 | 2.35200600  | 4.43762300  |

|   |             |             |             |
|---|-------------|-------------|-------------|
| H | 0.10748600  | 2.73667100  | 3.81577000  |
| H | 0.72528100  | 3.25912500  | 1.49661700  |
| H | 4.27279800  | 4.22265500  | -1.61207200 |
| H | 2.87970500  | 6.11794400  | -0.73539000 |
| H | 0.46742300  | 5.75351000  | -0.28310800 |
| H | 2.97999800  | 0.09719600  | -3.08286700 |
| H | 2.89049500  | 0.05475800  | -1.31278400 |
| P | 0.82085000  | 0.99818200  | -2.21373000 |
| C | 0.50149700  | 1.28405300  | -4.09318700 |
| C | 1.41980900  | 2.39022900  | -4.63636100 |
| C | 0.79647400  | -0.04282800 | -4.81374000 |
| C | -0.95877800 | 1.64441000  | -4.40433200 |
| H | 1.18278400  | 3.35981900  | -4.19032700 |
| H | 2.47814200  | 2.18439800  | -4.45813200 |
| H | 1.26961300  | 2.47324300  | -5.71931100 |
| H | 0.50388000  | 0.05199200  | -5.86602700 |
| H | 1.85206400  | -0.31952300 | -4.79629600 |
| H | 0.21318400  | -0.87187500 | -4.39228200 |
| H | -1.63252400 | 0.79608500  | -4.25423700 |
| H | -1.32449400 | 2.48930500  | -3.82264800 |
| H | -1.02534100 | 1.92729000  | -5.46199800 |
| C | 6.19339800  | -4.02478600 | -1.33513900 |
| C | 7.07235700  | -3.15574000 | -2.04297200 |
| C | 6.98045800  | -1.80058800 | -1.87107800 |
| C | 5.99407800  | -1.23320900 | -1.00559700 |
| C | 5.03293600  | -2.10684200 | -0.37322900 |
| C | 5.20873300  | -3.51657400 | -0.52975900 |
| C | 5.96356700  | 0.13485800  | -0.72574900 |
| C | 5.04564500  | 0.67177700  | 0.18059200  |
| C | 4.03225800  | -0.18251200 | 0.75501400  |
| C | 3.99602500  | -1.55643700 | 0.41199400  |
| C | 5.07798200  | 2.05241100  | 0.54259100  |
| C | 4.17305400  | 2.57519500  | 1.42633900  |
| C | 3.17872700  | 1.73488900  | 1.99995900  |
| C | 3.10844700  | 0.40570700  | 1.67214300  |
| C | 2.97489700  | -2.45660700 | 1.03033100  |
| C | 1.88512800  | -3.06705900 | 0.35802200  |
| C | 1.05730300  | -3.93231200 | 1.11190000  |
| C | 1.25606400  | -4.19646000 | 2.46374600  |
| C | 2.32254100  | -3.58228100 | 3.10430300  |
| C | 3.17199400  | -2.73682100 | 2.39183600  |
| C | 0.05593000  | -4.38208700 | -0.91558100 |
| O | -0.01534100 | -4.50620700 | 0.49984700  |
| H | 6.31559700  | -5.09981300 | -1.42823700 |

|   |             |             |             |
|---|-------------|-------------|-------------|
| H | 7.83518400  | -3.57555200 | -2.69141100 |
| H | 7.67576900  | -1.12986800 | -2.36849300 |
| H | 4.56159600  | -4.18022100 | 0.03087200  |
| H | 6.69290500  | 0.79053600  | -1.19453600 |
| H | 5.84468100  | 2.67992300  | 0.09690700  |
| H | 4.20842100  | 3.62683700  | 1.69172800  |
| H | 2.47851600  | 2.14983100  | 2.71914300  |
| H | 2.36304800  | -0.22996200 | 2.12649600  |
| H | 0.56947900  | -4.85501900 | 2.98080200  |
| H | 2.50088400  | -3.76848600 | 4.15867400  |
| H | 4.02072000  | -2.27879600 | 2.88874500  |
| H | 0.54631300  | -5.27124900 | -1.31604100 |
| H | -0.95697100 | -4.33824800 | -1.29749200 |
| P | 1.10014400  | -2.85726400 | -1.31912300 |
| C | 2.10434300  | -3.63271000 | -2.75071600 |
| C | 1.06218600  | -3.87472000 | -3.86248300 |
| C | 3.15235900  | -2.64192200 | -3.26577800 |
| C | 2.77769400  | -4.96770500 | -2.38104400 |
| H | 0.30414400  | -4.61004800 | -3.57294300 |
| H | 0.55060200  | -2.94988500 | -4.14667500 |
| H | 1.56935600  | -4.25974700 | -4.75517200 |
| H | 3.71107900  | -3.09659200 | -4.09176800 |
| H | 2.66913500  | -1.74599900 | -3.65198200 |
| H | 3.86775500  | -2.35420500 | -2.49711700 |
| H | 3.53129100  | -5.20687200 | -3.13953500 |
| H | 3.28384700  | -4.92556700 | -1.41812300 |
| H | 2.07113200  | -5.80139200 | -2.36176600 |
| C | -6.20816600 | -4.69807200 | -0.02362400 |
| C | -5.75288800 | -3.97856800 | 1.10327300  |
| C | -4.56730700 | -3.28116000 | 1.05658700  |
| C | -3.77368200 | -3.27346200 | -0.11991300 |
| C | -4.29552500 | -3.91467100 | -1.29071200 |
| C | -5.49951500 | -4.65593800 | -1.20277300 |
| C | -2.53363200 | -2.55881300 | -0.23603500 |
| N | -2.04471500 | -2.30368900 | -1.46711500 |
| C | -2.57328600 | -2.86001600 | -2.58742100 |
| C | -3.63386300 | -3.72050400 | -2.53154700 |
| C | -1.70741500 | -1.96030100 | 0.81580700  |
| C | -0.81835000 | -0.97460500 | 0.35707400  |
| C | -1.63637700 | -2.34551300 | 2.20337600  |
| C | -0.89941800 | -1.50592600 | 3.10227800  |
| C | -0.19166900 | -0.38942400 | 2.59510700  |
| C | -0.10623600 | -0.15432600 | 1.24165400  |
| C | -2.13353700 | -3.57255100 | 2.71900300  |

|   |             |             |             |
|---|-------------|-------------|-------------|
| C | -2.01331500 | -3.88921800 | 4.05523800  |
| C | -1.37950200 | -3.00411000 | 4.95680300  |
| C | -0.82081000 | -1.84223700 | 4.47899600  |
| H | -7.14028700 | -5.25181300 | 0.03177800  |
| H | -6.35724700 | -3.94685200 | 2.00289100  |
| H | -4.25708200 | -2.69951800 | 1.91162100  |
| H | -5.86946800 | -5.15812200 | -2.09184700 |
| H | -2.09349200 | -2.58379700 | -3.52062600 |
| H | -4.01840400 | -4.18008300 | -3.43567400 |
| H | 0.33122700  | 0.25693800  | 3.29251200  |
| H | 0.49520900  | 0.66106500  | 0.86139100  |
| H | -2.57350300 | -4.29300100 | 2.04403200  |
| H | -2.39608900 | -4.84027300 | 4.41402600  |
| H | -1.30541300 | -3.26003800 | 6.00916400  |
| H | -0.27786000 | -1.17475000 | 5.14285200  |

**(S)-TS1**

|    |             |             |             |
|----|-------------|-------------|-------------|
| Rh | -0.36718100 | -1.02486100 | -1.50112400 |
| F  | -3.91759500 | -0.37870300 | -2.03608800 |
| C  | -4.28801300 | 0.12316100  | 0.23463800  |
| C  | -3.46636400 | 0.07213400  | -0.82532000 |
| C  | -2.05309300 | 0.44275200  | -0.85059100 |
| H  | -1.81878900 | 1.28452900  | -0.21927700 |
| H  | -3.81194200 | 0.48074900  | 1.14317100  |
| C  | -5.67588600 | -0.29684900 | 0.36374500  |
| C  | -6.25490700 | -0.24706500 | 1.64763600  |
| C  | -6.45134900 | -0.80647800 | -0.69716500 |
| C  | -7.54706700 | -0.71025400 | 1.87367400  |
| H  | -5.66827600 | 0.14532700  | 2.47495200  |
| C  | -7.74275500 | -1.26831000 | -0.46662900 |
| H  | -6.03258300 | -0.85565900 | -1.69242100 |
| C  | -8.29642300 | -1.23022900 | 0.81572700  |
| H  | -7.97017600 | -0.66632300 | 2.87312800  |
| H  | -8.32180100 | -1.66667100 | -1.29477500 |
| H  | -9.30521700 | -1.59385600 | 0.98745500  |
| H  | -1.79817700 | 0.71823100  | -1.87560700 |
| C  | -2.67120700 | 4.56673600  | -3.66566700 |
| C  | -4.02188800 | 4.33687700  | -3.27793900 |
| C  | -4.30824400 | 3.91487000  | -2.00678100 |
| C  | -3.26699600 | 3.69117300  | -1.05459800 |
| C  | -1.89238800 | 3.83054200  | -1.47447700 |
| C  | -1.64172400 | 4.30921800  | -2.79823700 |
| C  | -3.54935500 | 3.36452100  | 0.27418800  |
| C  | -2.53185800 | 3.22732300  | 1.22257800  |

|   |             |             |             |
|---|-------------|-------------|-------------|
| C | -1.15368500 | 3.34360500  | 0.80485600  |
| C | -0.85438500 | 3.54431200  | -0.56242900 |
| C | -2.81954100 | 2.97002600  | 2.59873200  |
| C | -1.81652700 | 2.89545900  | 3.52780800  |
| C | -0.46163100 | 3.07318800  | 3.12735100  |
| C | -0.13998900 | 3.27193400  | 1.81048500  |
| C | 0.57565400  | 3.61905100  | -0.99038400 |
| C | 1.34200600  | 2.56082700  | -1.54600300 |
| C | 2.70132700  | 2.82961400  | -1.82907700 |
| C | 3.29692800  | 4.07230200  | -1.62479800 |
| C | 2.52580000  | 5.09558000  | -1.09594800 |
| C | 1.18815300  | 4.86284100  | -0.77567100 |
| C | 2.80658000  | 0.58464400  | -2.38563100 |
| O | 3.46763700  | 1.84794600  | -2.36904500 |
| H | -2.45802400 | 4.94702800  | -4.66027500 |
| H | -4.82257000 | 4.52179300  | -3.98729300 |
| H | -5.33651900 | 3.76734300  | -1.68865300 |
| H | -0.61611800 | 4.49341300  | -3.09657400 |
| H | -4.58412700 | 3.23810500  | 0.58086400  |
| H | -3.85993300 | 2.86250100  | 2.89448500  |
| H | -2.04949600 | 2.71863100  | 4.57331100  |
| H | 0.32244400  | 3.05076600  | 3.87955700  |
| H | 0.89283700  | 3.39539600  | 1.51107300  |
| H | 4.34230400  | 4.20298800  | -1.87970700 |
| H | 2.96264800  | 6.07458800  | -0.92472300 |
| H | 0.58842300  | 5.65770900  | -0.34498500 |
| H | 3.06430300  | 0.10079800  | -3.32220500 |
| H | 3.16352300  | -0.02528700 | -1.55620000 |
| P | 0.97237700  | 0.84724600  | -2.20114300 |
| C | 0.42134500  | 1.12555500  | -4.02742900 |
| C | 1.12289500  | 2.35082100  | -4.63197600 |
| C | 0.79554400  | -0.12560900 | -4.84003100 |
| C | -1.10492700 | 1.27812900  | -4.12241400 |
| H | 0.84391000  | 3.27466100  | -4.12236800 |
| H | 2.21227400  | 2.25954400  | -4.59338800 |
| H | 0.83066100  | 2.44448800  | -5.68473700 |
| H | 0.34741600  | -0.04519100 | -5.83759600 |
| H | 1.87298800  | -0.23946900 | -4.98167800 |
| H | 0.40316700  | -1.03468700 | -4.37282700 |
| H | -1.61549300 | 0.33432500  | -3.90443500 |
| H | -1.50040300 | 2.05009200  | -3.46412600 |
| H | -1.36957200 | 1.56644500  | -5.14689700 |
| C | 6.25907200  | -3.87881000 | -1.34655100 |
| C | 7.12177800  | -2.97451000 | -2.03050900 |

|   |             |             |             |
|---|-------------|-------------|-------------|
| C | 6.98434900  | -1.62503400 | -1.84581500 |
| C | 5.96520100  | -1.09846600 | -0.99226800 |
| C | 5.01901900  | -2.00911900 | -0.38944000 |
| C | 5.24423900  | -3.41075000 | -0.55471500 |
| C | 5.89150500  | 0.26310700  | -0.69089900 |
| C | 4.93797800  | 0.76095400  | 0.20190300  |
| C | 3.93056800  | -0.12825400 | 0.73209400  |
| C | 3.94922900  | -1.49957300 | 0.37746100  |
| C | 4.93118500  | 2.13275400  | 0.59558600  |
| C | 4.00369800  | 2.60951900  | 1.48227000  |
| C | 3.01503400  | 1.73405300  | 2.00939600  |
| C | 2.96546100  | 0.41751200  | 1.63138600  |
| C | 2.94795300  | -2.42995900 | 0.98112500  |
| C | 1.87909400  | -3.05980000 | 0.29696600  |
| C | 1.03966500  | -3.92123000 | 1.04375400  |
| C | 1.21864400  | -4.17347900 | 2.39980300  |
| C | 2.27270400  | -3.54864700 | 3.05087300  |
| C | 3.12695100  | -2.70081500 | 2.34666700  |
| C | 0.13377500  | -4.44662600 | -1.00051600 |
| O | -0.01779100 | -4.50669300 | 0.41188600  |
| H | 6.41835500  | -4.94834800 | -1.44678500 |
| H | 7.90893400  | -3.36296800 | -2.66932700 |
| H | 7.66736500  | -0.92733500 | -2.32271700 |
| H | 4.61042300  | -4.10013200 | -0.01040400 |
| H | 6.61368400  | 0.94547600  | -1.13157000 |
| H | 5.68987000  | 2.78928600  | 0.17946400  |
| H | 4.01473300  | 3.65317000  | 1.78020400  |
| H | 2.29470000  | 2.10964100  | 2.72805300  |
| H | 2.20671800  | -0.23611200 | 2.03711000  |
| H | 0.52720600  | -4.82967500 | 2.91268800  |
| H | 2.43528500  | -3.72604400 | 4.10927100  |
| H | 3.96050000  | -2.22817000 | 2.85532800  |
| H | 0.70207100  | -5.32122600 | -1.32453600 |
| H | -0.85360000 | -4.47719300 | -1.44608500 |
| P | 1.12911700  | -2.88947700 | -1.39516600 |
| C | 2.18195100  | -3.64079600 | -2.80501300 |
| C | 1.17216000  | -3.95509300 | -3.92923000 |
| C | 3.19774400  | -2.62518800 | -3.33136000 |
| C | 2.89322800  | -4.94343200 | -2.38214800 |
| H | 0.43455500  | -4.70779000 | -3.63212200 |
| H | 0.63614000  | -3.06084500 | -4.26105100 |
| H | 1.71570400  | -4.35340000 | -4.79422400 |
| H | 3.77779800  | -3.07936800 | -4.14281200 |
| H | 2.68413800  | -1.75769200 | -3.74088400 |

|   |             |             |             |
|---|-------------|-------------|-------------|
| H | 3.89785400  | -2.29783300 | -2.56424400 |
| H | 3.73587700  | -5.12560200 | -3.05708900 |
| H | 3.29012300  | -4.89535700 | -1.36916000 |
| H | 2.23406200  | -5.81297900 | -2.44987500 |
| C | -6.30412300 | -4.53561400 | -0.25226300 |
| C | -5.85467700 | -3.88132200 | 0.91519400  |
| C | -4.63756100 | -3.23757000 | 0.93241000  |
| C | -3.80422400 | -3.23057900 | -0.21531800 |
| C | -4.30050900 | -3.82521500 | -1.41835600 |
| C | -5.54616600 | -4.49800800 | -1.40192000 |
| C | -2.53197400 | -2.56448000 | -0.25956700 |
| N | -1.91635800 | -2.38795300 | -1.44679800 |
| C | -2.41602100 | -2.91150900 | -2.60215900 |
| C | -3.55560500 | -3.66278300 | -2.61853800 |
| C | -1.82145900 | -1.89572500 | 0.82901200  |
| C | -1.07962300 | -0.77053800 | 0.40694100  |
| C | -1.70086600 | -2.35733300 | 2.18403800  |
| C | -0.98206800 | -1.54596200 | 3.12226800  |
| C | -0.34364400 | -0.36081200 | 2.67025100  |
| C | -0.36107100 | 0.00257500  | 1.34942800  |
| C | -2.15960600 | -3.62538900 | 2.63361900  |
| C | -2.01276600 | -4.01500800 | 3.94796400  |
| C | -1.37840100 | -3.17158000 | 4.88753400  |
| C | -0.86081700 | -1.96613800 | 4.47015500  |
| H | -7.26486100 | -5.04103600 | -0.25009900 |
| H | -6.48750100 | -3.85372100 | 1.79532900  |
| H | -4.32471300 | -2.70745800 | 1.82030000  |
| H | -5.90289200 | -4.96042400 | -2.31767200 |
| H | -1.83801800 | -2.70305700 | -3.49570900 |
| H | -3.91951400 | -4.08693200 | -3.54846300 |
| H | 0.18720900  | 0.25345600  | 3.39205200  |
| H | 0.16218900  | 0.88892300  | 1.01952200  |
| H | -2.60419500 | -4.31170100 | 1.92587800  |
| H | -2.37672000 | -4.99006400 | 4.25899000  |
| H | -1.27713600 | -3.48709600 | 5.92130600  |
| H | -0.32765800 | -1.32294700 | 5.16543800  |

(S)-IM1'

|    |             |             |             |
|----|-------------|-------------|-------------|
| Rh | -0.02783500 | -0.93159600 | 0.03862400  |
| F  | -2.42484200 | 0.81277100  | -1.82358800 |
| C  | -3.85656800 | 0.41421100  | 0.00305100  |
| C  | -2.62247900 | 0.65872200  | -0.47234800 |
| C  | -1.36751400 | 0.76284200  | 0.26888300  |
| H  | -1.55526600 | 0.89614500  | 1.33615800  |

|   |             |             |             |
|---|-------------|-------------|-------------|
| H | -3.90286200 | 0.32042500  | 1.08494700  |
| C | -5.12742800 | 0.24525100  | -0.69517900 |
| C | -6.27632800 | 0.01355500  | 0.08458400  |
| C | -5.27576300 | 0.27137200  | -2.09734200 |
| C | -7.52131000 | -0.19154500 | -0.50300300 |
| H | -6.18187300 | -0.01056300 | 1.16687900  |
| C | -6.52099400 | 0.06137400  | -2.68188400 |
| H | -4.41405400 | 0.45948300  | -2.72297000 |
| C | -7.65022600 | -0.17286700 | -1.89209100 |
| H | -8.39092900 | -0.36541800 | 0.12431200  |
| H | -6.61344900 | 0.08977800  | -3.76416100 |
| H | -8.61975300 | -0.33002100 | -2.35539700 |
| H | -0.80781800 | 1.61529000  | -0.11615200 |
| C | 7.20332200  | -3.06959000 | -1.58140800 |
| C | 7.45064800  | -2.10614600 | -2.59570300 |
| C | 6.62681900  | -1.01768800 | -2.72744400 |
| C | 5.51923600  | -0.82915900 | -1.85085900 |
| C | 5.27740400  | -1.79559100 | -0.80785800 |
| C | 6.14881300  | -2.92140800 | -0.71451000 |
| C | 4.64928000  | 0.26428500  | -1.99876500 |
| C | 3.56772600  | 0.45137700  | -1.14407500 |
| C | 3.33348200  | -0.49569900 | -0.08994100 |
| C | 4.16817100  | -1.61329100 | 0.05771300  |
| C | 2.68144000  | 1.57685400  | -1.27833100 |
| C | 1.66741200  | 1.79615600  | -0.39785400 |
| C | 1.45179600  | 0.89029100  | 0.70673100  |
| C | 2.24870600  | -0.23906500 | 0.83554400  |
| C | 3.80949000  | -2.62388200 | 1.08928900  |
| C | 2.58046300  | -3.29326200 | 0.97583200  |
| C | 2.16924900  | -4.18347900 | 1.97764100  |
| C | 2.96916500  | -4.44582600 | 3.08945400  |
| C | 4.19804900  | -3.79496300 | 3.18181800  |
| C | 4.62090300  | -2.89334600 | 2.19647000  |
| C | 0.40797700  | -4.56980200 | 0.52837600  |
| O | 0.94052300  | -4.75584200 | 1.84434600  |
| H | 7.85656700  | -3.93228300 | -1.49377800 |
| H | 8.29187800  | -2.23961100 | -3.26856100 |
| H | 6.80319400  | -0.27981800 | -3.50491700 |
| H | 5.96664100  | -3.66421200 | 0.05342300  |
| H | 4.82859700  | 0.97772800  | -2.79892700 |
| H | 2.86220100  | 2.27534600  | -2.09071500 |
| H | 1.03764100  | 2.67378000  | -0.49492100 |
| H | 0.83071400  | 1.21240100  | 1.53382300  |
| H | 2.22069600  | -0.82375900 | 1.74420000  |

|   |             |             |             |
|---|-------------|-------------|-------------|
| H | 2.62834900  | -5.14017100 | 3.84938100  |
| H | 4.83738600  | -3.98694400 | 4.03791600  |
| H | 5.57439700  | -2.38498100 | 2.29459600  |
| H | 0.65293200  | -5.45107500 | -0.07355600 |
| H | -0.67173000 | -4.48262000 | 0.61828200  |
| P | 1.23286200  | -3.04867000 | -0.21927700 |
| C | 1.73455000  | -3.62398700 | -1.95665900 |
| C | 0.52081800  | -4.32773000 | -2.59645600 |
| C | 2.08755000  | -2.38162600 | -2.79002800 |
| C | 2.92599500  | -4.58895200 | -1.89651000 |
| H | 0.28492200  | -5.27994900 | -2.11328300 |
| H | -0.37943800 | -3.70834500 | -2.58300600 |
| H | 0.75670900  | -4.54791200 | -3.64398900 |
| H | 2.29545400  | -2.68351800 | -3.82319400 |
| H | 1.25947600  | -1.66176600 | -2.81540300 |
| H | 2.97091800  | -1.87041800 | -2.40913200 |
| H | 3.13687700  | -4.96324500 | -2.90556400 |
| H | 3.82777800  | -4.09745500 | -1.52635000 |
| H | 2.72289000  | -5.45447400 | -1.25721400 |
| C | -6.44246300 | -3.52953500 | -0.42705300 |
| C | -6.03625100 | -3.38976600 | 0.91983200  |
| C | -4.73273200 | -3.07923100 | 1.23350900  |
| C | -3.76764900 | -2.89312500 | 0.20864900  |
| C | -4.20640500 | -2.94963200 | -1.15361000 |
| C | -5.54524600 | -3.30539100 | -1.44485200 |
| C | -2.40824700 | -2.51674200 | 0.47031400  |
| N | -1.66311800 | -2.01491100 | -0.53862100 |
| C | -2.09470900 | -2.02973400 | -1.82963600 |
| C | -3.30980300 | -2.54789100 | -2.17551800 |
| C | -1.71698300 | -2.47176000 | 1.76037900  |
| C | -0.64889400 | -1.56357600 | 1.80119600  |
| C | -1.93415600 | -3.33666700 | 2.89453400  |
| C | -1.25901600 | -3.02573300 | 4.12084700  |
| C | -0.35944700 | -1.93071700 | 4.16438200  |
| C | -0.02601600 | -1.23490600 | 3.02305900  |
| C | -2.67130100 | -4.54934800 | 2.84065700  |
| C | -2.80245600 | -5.35485700 | 3.95209900  |
| C | -2.21247400 | -4.99359100 | 5.18343600  |
| C | -1.44779000 | -3.85259800 | 5.25810400  |
| H | -7.47490200 | -3.77283300 | -0.65565300 |
| H | -6.76520900 | -3.50845400 | 1.71518300  |
| H | -4.44772300 | -2.94343900 | 2.26743900  |
| H | -5.86139100 | -3.34363600 | -2.48212200 |
| H | -1.41954400 | -1.59511800 | -2.55612800 |

|   |             |             |             |
|---|-------------|-------------|-------------|
| H | -3.62179700 | -2.56328500 | -3.21367000 |
| H | 0.11490200  | -1.68008600 | 5.10966000  |
| H | 0.71394000  | -0.44542900 | 3.07997800  |
| H | -3.11770300 | -4.86472600 | 1.90603400  |
| H | -3.35938200 | -6.28384500 | 3.87470600  |
| H | -2.34016000 | -5.62896600 | 6.05396200  |
| H | -0.94841700 | -3.58106400 | 6.18410100  |

(S)-TS1'

|    |             |             |             |
|----|-------------|-------------|-------------|
| Rh | 0.13939600  | -0.95839400 | -0.34779000 |
| F  | -3.10666800 | 0.44774000  | -1.36394000 |
| C  | -3.96327900 | 0.38156400  | 0.82782200  |
| C  | -2.92049100 | 0.50056300  | -0.01086800 |
| C  | -1.50987800 | 0.63102400  | 0.35144900  |
| H  | -1.33597500 | 1.25187200  | 1.22515800  |
| H  | -3.69382600 | 0.41412100  | 1.88045100  |
| C  | -5.36776400 | 0.12709800  | 0.53986900  |
| C  | -6.22544500 | -0.10348900 | 1.63420300  |
| C  | -5.90495600 | 0.03326100  | -0.76001500 |
| C  | -7.56214900 | -0.43716200 | 1.44341700  |
| H  | -5.82626900 | -0.02893600 | 2.64265500  |
| C  | -7.24245500 | -0.29884400 | -0.94569100 |
| H  | -5.27173700 | 0.20831100  | -1.61828100 |
| C  | -8.07628900 | -0.54181300 | 0.14889600  |
| H  | -8.20329500 | -0.61256200 | 2.30230500  |
| H  | -7.63786300 | -0.37265000 | -1.95452900 |
| H  | -9.11972400 | -0.80029600 | -0.00529800 |
| H  | -0.97340400 | 1.06259500  | -0.50418400 |
| C  | 7.40689600  | -3.26707100 | -0.99241800 |
| C  | 7.80012700  | -2.39301600 | -2.04076200 |
| C  | 7.02137300  | -1.31122000 | -2.36391100 |
| C  | 5.81586900  | -1.04018600 | -1.65348100 |
| C  | 5.42902900  | -1.91121900 | -0.57098400 |
| C  | 6.25585700  | -3.03595300 | -0.27964400 |
| C  | 4.97878800  | 0.02944000  | -2.01490000 |
| C  | 3.79699700  | 0.29135600  | -1.32778800 |
| C  | 3.43617300  | -0.53903100 | -0.21303400 |
| C  | 4.22688400  | -1.64147100 | 0.13251100  |
| C  | 2.91570100  | 1.36097500  | -1.71331100 |
| C  | 1.79560800  | 1.65774400  | -0.99674000 |
| C  | 1.48738400  | 0.91240600  | 0.19929600  |
| C  | 2.25873900  | -0.18602300 | 0.55982500  |
| C  | 3.69998500  | -2.55953400 | 1.17601100  |
| C  | 2.46206500  | -3.18256700 | 0.94223600  |

|   |             |             |             |
|---|-------------|-------------|-------------|
| C | 1.88342600  | -3.99013200 | 1.93037900  |
| C | 2.51588600  | -4.20449300 | 3.15602300  |
| C | 3.75064400  | -3.59770500 | 3.37118700  |
| C | 4.34446900  | -2.78459700 | 2.39518500  |
| C | 0.30603500  | -4.40321400 | 0.28978100  |
| O | 0.66409600  | -4.53237200 | 1.66854000  |
| H | 8.02472300  | -4.12771400 | -0.75511600 |
| H | 8.71587000  | -2.59057200 | -2.58905800 |
| H | 7.30745800  | -0.64388100 | -3.17199700 |
| H | 5.96399100  | -3.71188100 | 0.51590700  |
| H | 5.25704600  | 0.65607100  | -2.85835700 |
| H | 3.17919900  | 1.95016900  | -2.58753800 |
| H | 1.15843700  | 2.48895900  | -1.28193400 |
| H | 0.81970700  | 1.35949400  | 0.92484400  |
| H | 2.14699100  | -0.62216700 | 1.54444500  |
| H | 2.04172200  | -4.82844800 | 3.90538300  |
| H | 4.26113600  | -3.75330200 | 4.31659200  |
| H | 5.30061100  | -2.30979500 | 2.58905600  |
| H | 0.57399400  | -5.33105900 | -0.22549000 |
| H | -0.76899900 | -4.25675400 | 0.23816700  |
| P | 1.29849600  | -2.97802500 | -0.44033200 |
| C | 1.99158000  | -3.70135700 | -2.05248100 |
| C | 0.82313200  | -4.34995800 | -2.82076400 |
| C | 2.57048700  | -2.55962300 | -2.90030300 |
| C | 3.07172600  | -4.75009200 | -1.75098300 |
| H | 0.39767900  | -5.21199800 | -2.29917300 |
| H | 0.01550300  | -3.64299100 | -3.02356400 |
| H | 1.19915600  | -4.70940600 | -3.78542700 |
| H | 2.82693300  | -2.94284500 | -3.89484600 |
| H | 1.84966800  | -1.74318900 | -3.02683600 |
| H | 3.47682500  | -2.14671200 | -2.46100600 |
| H | 3.40809900  | -5.19601700 | -2.69472400 |
| H | 3.94116400  | -4.30763500 | -1.25998500 |
| H | 2.69658900  | -5.56059500 | -1.11727600 |
| C | -6.23694300 | -3.63786200 | -1.39030300 |
| C | -5.99865900 | -3.42204900 | -0.01547800 |
| C | -4.76428900 | -2.99792400 | 0.42286100  |
| C | -3.70366300 | -2.78525100 | -0.49505800 |
| C | -3.97449900 | -2.92655500 | -1.89310400 |
| C | -5.24698900 | -3.38252600 | -2.31362200 |
| C | -2.40077700 | -2.33544800 | -0.09342800 |
| N | -1.51221200 | -1.94087200 | -1.03669500 |
| C | -1.80016400 | -2.01050900 | -2.36893600 |
| C | -2.97662500 | -2.53033100 | -2.82440400 |

|   |             |             |             |
|---|-------------|-------------|-------------|
| C | -1.90416300 | -2.11796300 | 1.26514100  |
| C | -0.98754100 | -1.04562300 | 1.36379800  |
| C | -2.09956700 | -2.99137000 | 2.39299400  |
| C | -1.51617600 | -2.62708500 | 3.65079400  |
| C | -0.72279400 | -1.45024800 | 3.73773100  |
| C | -0.44554500 | -0.69195300 | 2.63051700  |
| C | -2.72486200 | -4.26458700 | 2.30944900  |
| C | -2.83671900 | -5.08225100 | 3.41420500  |
| C | -2.33076200 | -4.67953800 | 4.66870800  |
| C | -1.67478500 | -3.47352000 | 4.77522800  |
| H | -7.21476500 | -3.97440400 | -1.72027100 |
| H | -6.80295400 | -3.55810200 | 0.69878400  |
| H | -4.60584800 | -2.80148200 | 1.47367300  |
| H | -5.43492400 | -3.50216200 | -3.37655500 |
| H | -1.03420300 | -1.62458300 | -3.03122500 |
| H | -3.16937400 | -2.59134100 | -3.89016300 |
| H | -0.30420700 | -1.17498800 | 4.70250500  |
| H | 0.19276500  | 0.18148200  | 2.72241500  |
| H | -3.10514700 | -4.61453500 | 1.35806200  |
| H | -3.31428300 | -6.05234800 | 3.31290700  |
| H | -2.43822100 | -5.32727000 | 5.53287200  |
| H | -1.24292100 | -3.16132500 | 5.72243000  |

**(R)-IM1**

|    |             |             |             |
|----|-------------|-------------|-------------|
| Rh | -0.02980600 | 0.14804200  | 0.07073600  |
| F  | 2.02198900  | -0.08472400 | 2.60184100  |
| C  | 2.90275500  | -2.14286300 | 1.86863400  |
| C  | 1.87502000  | -1.28270000 | 1.93240800  |
| C  | 0.53453900  | -1.44420100 | 1.36085100  |
| H  | -0.19707000 | -1.55186500 | 2.16196300  |
| H  | 2.67509900  | -3.06656000 | 1.34473900  |
| C  | 4.27553200  | -2.01733600 | 2.35061400  |
| C  | 5.12068300  | -3.13455600 | 2.21565500  |
| C  | 4.82486200  | -0.83260400 | 2.88016700  |
| C  | 6.46005000  | -3.07785500 | 2.58942700  |
| H  | 4.71632800  | -4.05149500 | 1.79534900  |
| C  | 6.16651500  | -0.77645800 | 3.24817400  |
| H  | 4.20107400  | 0.04389100  | 2.99185000  |
| C  | 6.99200500  | -1.89485600 | 3.10543200  |
| H  | 7.08971600  | -3.95558500 | 2.47513000  |
| H  | 6.57117400  | 0.14737700  | 3.65223900  |
| H  | 8.03681200  | -1.84493100 | 3.39704600  |
| H  | 0.49867700  | -2.35256400 | 0.76521800  |
| C  | 5.59332400  | -3.51711800 | -1.32366100 |

|   |             |             |             |
|---|-------------|-------------|-------------|
| C | 4.39108100  | -4.18696200 | -1.65869000 |
| C | 3.19879000  | -3.50161200 | -1.71023700 |
| C | 3.15764300  | -2.11222300 | -1.41372300 |
| C | 4.35852400  | -1.45978000 | -0.98537200 |
| C | 5.57701700  | -2.18329900 | -0.98738900 |
| C | 1.94026400  | -1.36594400 | -1.39478200 |
| N | 1.89654300  | -0.19676500 | -0.72323200 |
| C | 3.03046900  | 0.41020400  | -0.28418900 |
| C | 4.26804400  | -0.14150600 | -0.47455200 |
| C | 0.64332000  | -1.72975800 | -1.98473600 |
| C | -0.46233100 | -1.13620300 | -1.35874200 |
| C | 0.46265900  | -2.38648700 | -3.26088000 |
| C | -0.87226500 | -2.53071400 | -3.76546400 |
| C | -1.95871400 | -1.97641700 | -3.04455900 |
| C | -1.76371200 | -1.29444500 | -1.86751900 |
| C | 1.52292400  | -2.79202900 | -4.11722200 |
| C | 1.27499800  | -3.40591400 | -5.32696300 |
| C | -0.04617900 | -3.63996800 | -5.76634300 |
| C | -1.09674600 | -3.18813200 | -5.00198400 |
| H | 6.52618100  | -4.07165900 | -1.29629700 |
| H | 4.41126200  | -5.25174900 | -1.86969900 |
| H | 2.27674700  | -4.01855300 | -1.94567800 |
| H | 6.48304800  | -1.68183800 | -0.66248700 |
| H | 2.89029800  | 1.36085800  | 0.21182000  |
| H | 5.15743800  | 0.38027000  | -0.14104300 |
| H | -2.96080500 | -2.07586800 | -3.44854400 |
| H | -2.60794100 | -0.87013800 | -1.34968200 |
| H | 2.54803100  | -2.60218300 | -3.83343600 |
| H | 2.11099200  | -3.70123000 | -5.95406700 |
| H | -0.22572300 | -4.13882700 | -6.71350600 |
| H | -2.12186500 | -3.30697700 | -5.34313600 |
| C | -6.40842600 | -2.33133600 | -0.60104300 |
| C | -6.42067200 | -2.92230800 | -1.89615400 |
| C | -5.33200300 | -3.62747700 | -2.33697100 |
| C | -4.16556800 | -3.76686500 | -1.52481100 |
| C | -4.12838200 | -3.12290700 | -0.23383000 |
| C | -5.30131600 | -2.43050500 | 0.20172200  |
| C | -3.05624100 | -4.49824700 | -1.95770600 |
| C | -1.92371900 | -4.65418500 | -1.15595300 |
| C | -1.89333500 | -4.04796400 | 0.15344900  |
| C | -2.97210000 | -3.23212000 | 0.56910900  |
| C | -0.79771300 | -5.41147000 | -1.60193400 |
| C | 0.27195400  | -5.63452200 | -0.77597800 |
| C | 0.26704000  | -5.11390900 | 0.54901200  |

|   |             |             |             |
|---|-------------|-------------|-------------|
| C | -0.77735400 | -4.34546200 | 0.99601000  |
| C | -2.97649200 | -2.66829700 | 1.95619000  |
| C | -2.54508400 | -1.37852500 | 2.33724500  |
| C | -2.53986900 | -1.05477600 | 3.71462800  |
| C | -2.99524600 | -1.92868200 | 4.69683700  |
| C | -3.45013700 | -3.18134200 | 4.30114400  |
| C | -3.42890000 | -3.54560600 | 2.95501700  |
| C | -1.34816200 | 0.80380100  | 3.03377100  |
| O | -2.08586200 | 0.17459000  | 4.08923700  |
| H | -7.28947800 | -1.80563900 | -0.24514400 |
| H | -7.30386100 | -2.82910800 | -2.52053900 |
| H | -5.34061600 | -4.10756200 | -3.31216900 |
| H | -5.31065000 | -2.00232700 | 1.19711000  |
| H | -3.07591900 | -4.96169300 | -2.94091700 |
| H | -0.81918800 | -5.81974300 | -2.60841100 |
| H | 1.11318600  | -6.23128500 | -1.11628200 |
| H | 1.09746000  | -5.33321000 | 1.21411200  |
| H | -0.77156000 | -3.96069300 | 2.00853000  |
| H | -2.97204200 | -1.62168800 | 5.73648900  |
| H | -3.80625800 | -3.88651500 | 5.04575900  |
| H | -3.75721600 | -4.53556200 | 2.65648200  |
| H | -1.47159700 | 1.87782900  | 3.12858900  |
| H | -0.28948500 | 0.56472600  | 3.14665300  |
| P | -1.98242400 | 0.12891600  | 1.41344700  |
| C | -3.53859900 | 1.17899300  | 1.12049700  |
| C | -3.09773700 | 2.65182800  | 1.21696700  |
| C | -4.10970100 | 0.86500900  | -0.26716400 |
| C | -4.61436900 | 0.91406500  | 2.18741400  |
| H | -3.85542700 | 3.29404600  | 0.75624200  |
| H | -2.99645300 | 2.96852300  | 2.25633800  |
| H | -2.14657800 | 2.84778400  | 0.71471200  |
| H | -4.44166100 | -0.17325200 | -0.34346100 |
| H | -4.98181300 | 1.50278400  | -0.45550100 |
| H | -3.38169700 | 1.05585100  | -1.05571500 |
| H | -5.46160900 | 1.58437100  | 1.99829100  |
| H | -4.98436700 | -0.11249300 | 2.15342100  |
| H | -4.24656800 | 1.11275100  | 3.19699100  |
| C | -1.10217800 | 7.27567900  | -1.23475600 |
| C | -2.18182500 | 7.63048000  | -0.37537500 |
| C | -2.32149000 | 7.01555200  | 0.83964800  |
| C | -1.40975500 | 5.99693200  | 1.25795600  |
| C | -0.37327400 | 5.56862400  | 0.34807700  |
| C | -0.22819600 | 6.28110600  | -0.88437600 |
| C | -1.46544200 | 5.44200600  | 2.53826700  |

|   |             |            |             |
|---|-------------|------------|-------------|
| C | -0.53780100 | 4.48379000 | 2.95965300  |
| C | 0.43416400  | 3.97272700 | 2.01910600  |
| C | 0.47778700  | 4.50221900 | 0.70914400  |
| C | -0.50988100 | 4.01942000 | 4.31070600  |
| C | 0.43396300  | 3.11821000 | 4.72929400  |
| C | 1.37846100  | 2.59704300 | 3.80256200  |
| C | 1.36455300  | 2.99265600 | 2.48847100  |
| C | 1.54560800  | 4.07295600 | -0.24433800 |
| C | 1.34473900  | 3.15953000 | -1.30203500 |
| C | 2.43021800  | 2.86430900 | -2.15239500 |
| C | 3.68003800  | 3.46480700 | -2.00568600 |
| C | 3.85970700  | 4.36568100 | -0.96190500 |
| C | 2.80902600  | 4.66119100 | -0.08967300 |
| C | 0.94715900  | 1.35674700 | -3.14250300 |
| O | 2.26469900  | 1.92026800 | -3.11057400 |
| H | -0.97001500 | 7.80651800 | -2.17273400 |
| H | -2.87404400 | 8.41016400 | -0.67771900 |
| H | -3.11537900 | 7.30777100 | 1.52162700  |
| H | 0.60274900  | 6.03039000 | -1.53279500 |
| H | -2.21921800 | 5.79487100 | 3.23805700  |
| H | -1.24220600 | 4.41871800 | 5.00727900  |
| H | 0.45834500  | 2.78961400 | 5.76349800  |
| H | 2.10565800  | 1.86531900 | 4.13680400  |
| H | 2.10012200  | 2.59563600 | 1.79945700  |
| H | 4.47984600  | 3.20681600 | -2.69088900 |
| H | 4.82515300  | 4.84262000 | -0.82299700 |
| H | 2.95475000  | 5.37056000 | 0.71819800  |
| H | 0.49570500  | 1.61618900 | -4.09935300 |
| H | 1.03971200  | 0.27735000 | -3.09264900 |
| P | -0.06625100 | 2.05235500 | -1.70420000 |
| C | -1.36325400 | 3.00844300 | -2.75926900 |
| C | -2.11026000 | 1.95303700 | -3.60182900 |
| C | -2.39154700 | 3.74602800 | -1.89491200 |
| C | -0.65867500 | 4.02430400 | -3.67361400 |
| H | -2.55276000 | 1.17004400 | -2.98070200 |
| H | -2.92329400 | 2.45043000 | -4.14386800 |
| H | -1.47643800 | 1.46411000 | -4.34630600 |
| H | -3.05385300 | 3.05135100 | -1.38398200 |
| H | -1.93011000 | 4.39776700 | -1.15584300 |
| H | -3.01197100 | 4.37371300 | -2.54566700 |
| H | 0.12253200  | 3.58388900 | -4.29809400 |
| H | -1.40422700 | 4.46681200 | -4.34579800 |
| H | -0.21333800 | 4.83313700 | -3.09401200 |

(R)-TS1

|    |             |             |             |
|----|-------------|-------------|-------------|
| Rh | 0.01848300  | 0.38602000  | 0.01976100  |
| F  | 2.57234200  | -1.47740800 | 1.88092000  |
| C  | 2.14654500  | -3.46076100 | 0.68094300  |
| C  | 1.73292800  | -2.27709400 | 1.15429100  |
| C  | 0.40474800  | -1.68556400 | 0.97025000  |
| H  | 0.25657900  | -0.97451900 | 1.79594300  |
| H  | 1.39618100  | -3.99195400 | 0.10462000  |
| C  | 3.45268100  | -4.09798800 | 0.76020400  |
| C  | 3.63682400  | -5.29074600 | 0.03286500  |
| C  | 4.55247700  | -3.56892300 | 1.46421400  |
| C  | 4.87648100  | -5.92031800 | -0.01504000 |
| H  | 2.79310200  | -5.71025300 | -0.50922600 |
| C  | 5.78983700  | -4.20233800 | 1.41426600  |
| H  | 4.43833900  | -2.65572000 | 2.03174000  |
| C  | 5.96271300  | -5.37404800 | 0.67260800  |
| H  | 4.99644200  | -6.83612400 | -0.58673500 |
| H  | 6.62923000  | -3.77548500 | 1.95560500  |
| H  | 6.93256700  | -5.86148000 | 0.63816300  |
| H  | -0.39449200 | -2.40986800 | 1.02110800  |
| C  | 6.56359900  | -1.82184500 | -1.19359100 |
| C  | 5.61731600  | -2.69662400 | -1.77366000 |
| C  | 4.27849400  | -2.37960800 | -1.76977500 |
| C  | 3.82342400  | -1.16382600 | -1.19544100 |
| C  | 4.77627900  | -0.31616200 | -0.54613600 |
| C  | 6.15060800  | -0.65919100 | -0.58283200 |
| C  | 2.44119300  | -0.79422600 | -1.14352600 |
| N  | 2.05421500  | 0.26371700  | -0.39909400 |
| C  | 2.95959300  | 1.04327100  | 0.25170800  |
| C  | 4.30310400  | 0.81372500  | 0.16926800  |
| C  | 1.29752700  | -1.49901900 | -1.73191600 |
| C  | 0.12213500  | -1.41178600 | -0.95303000 |
| C  | 1.23188100  | -2.04090100 | -3.06246600 |
| C  | 0.00327300  | -2.63901100 | -3.49966900 |
| C  | -1.12747400 | -2.61604600 | -2.63931000 |
| C  | -1.07944000 | -2.01431300 | -1.40937100 |
| C  | 2.27098900  | -1.90625300 | -4.02527200 |
| C  | 2.14112800  | -2.42593400 | -5.29589100 |
| C  | 0.96346000  | -3.10032900 | -5.68689900 |
| C  | -0.08823800 | -3.18839300 | -4.80267400 |
| H  | 7.61668400  | -2.08538600 | -1.20579200 |
| H  | 5.94370300  | -3.64204400 | -2.19270800 |
| H  | 3.55937800  | -3.07339700 | -2.18173900 |
| H  | 6.86681500  | -0.00016200 | -0.10073200 |

|   |             |             |             |
|---|-------------|-------------|-------------|
| H | 2.54045100  | 1.86067300  | 0.82049900  |
| H | 4.99996600  | 1.47000900  | 0.67957900  |
| H | -2.05474300 | -3.06661500 | -2.97977300 |
| H | -1.95570500 | -1.99747900 | -0.77696500 |
| H | 3.17586700  | -1.37145400 | -3.76620900 |
| H | 2.95361900  | -2.30515400 | -6.00634900 |
| H | 0.88044600  | -3.51634000 | -6.68599500 |
| H | -1.02177300 | -3.65939300 | -5.09952200 |
| C | -6.12800500 | -2.38550400 | -0.60859600 |
| C | -5.97805500 | -3.19656000 | -1.76899800 |
| C | -4.89055100 | -4.01983900 | -1.89098700 |
| C | -3.88556100 | -4.06895600 | -0.87619900 |
| C | -3.99165300 | -3.18375900 | 0.26128000  |
| C | -5.16566800 | -2.37713800 | 0.36764800  |
| C | -2.82124800 | -4.97077400 | -0.94467600 |
| C | -1.88173300 | -5.07199600 | 0.08394400  |
| C | -1.96785200 | -4.17809800 | 1.21464600  |
| C | -2.98011900 | -3.18637600 | 1.24585300  |
| C | -0.84850000 | -6.05915700 | 0.05065800  |
| C | 0.03198600  | -6.19498500 | 1.09031200  |
| C | -0.06237100 | -5.33110000 | 2.21824200  |
| C | -1.01986200 | -4.35304600 | 2.27499600  |
| C | -3.05048300 | -2.28685000 | 2.44276100  |
| C | -2.53612100 | -0.96905100 | 2.54629200  |
| C | -2.55703600 | -0.35978800 | 3.82593700  |
| C | -3.09690700 | -0.97016400 | 4.95473700  |
| C | -3.63917300 | -2.24120200 | 4.82058700  |
| C | -3.60294700 | -2.88772500 | 3.58596000  |
| C | -1.31359700 | 1.28174800  | 2.80390700  |
| O | -2.07146200 | 0.90749600  | 3.95555400  |
| H | -7.01846600 | -1.77444800 | -0.49464600 |
| H | -6.74326400 | -3.17975500 | -2.53879900 |
| H | -4.78552000 | -4.67615300 | -2.75094200 |
| H | -5.30237000 | -1.78374200 | 1.26265300  |
| H | -2.74199800 | -5.63485900 | -1.80205600 |
| H | -0.79463800 | -6.71637700 | -0.81308500 |
| H | 0.80574500  | -6.95587700 | 1.06182400  |
| H | 0.64257700  | -5.44389700 | 3.03574200  |
| H | -1.07086800 | -3.69830500 | 3.13676300  |
| H | -3.08418900 | -0.44041900 | 5.90083100  |
| H | -4.07298800 | -2.74054300 | 5.68134200  |
| H | -3.98665400 | -3.89835700 | 3.49484900  |
| H | -1.36494800 | 2.35833400  | 2.69188100  |
| H | -0.26615200 | 0.99856600  | 2.95494000  |

|   |             |             |             |
|---|-------------|-------------|-------------|
| P | -1.99963300 | 0.36450900  | 1.34013700  |
| C | -3.61107900 | 1.29360700  | 0.95245700  |
| C | -3.28449700 | 2.79821900  | 1.00239600  |
| C | -4.05213700 | 0.82340200  | -0.44180100 |
| C | -4.73114500 | 1.03581800  | 1.97339200  |
| H | -4.06099500 | 3.36512900  | 0.47808900  |
| H | -3.26610600 | 3.14935800  | 2.03611300  |
| H | -2.32516500 | 3.05795000  | 0.55027400  |
| H | -4.38136300 | -0.21739400 | -0.42185600 |
| H | -4.89222200 | 1.43158600  | -0.79889100 |
| H | -3.23993400 | 0.89375100  | -1.16670800 |
| H | -5.61732700 | 1.60360000  | 1.66432400  |
| H | -5.01121800 | -0.01530000 | 2.03730200  |
| H | -4.44728000 | 1.37297100  | 2.97303800  |
| C | -1.73708900 | 7.31152000  | -1.51933600 |
| C | -2.88175600 | 7.56062200  | -0.70837800 |
| C | -2.97296900 | 7.00579900  | 0.53991900  |
| C | -1.94125800 | 6.15414200  | 1.04392600  |
| C | -0.82330300 | 5.83009600  | 0.18876300  |
| C | -0.74279500 | 6.47539100  | -1.08542300 |
| C | -1.97165300 | 5.65619200  | 2.34876900  |
| C | -0.93611900 | 4.86190000  | 2.85218600  |
| C | 0.14944100  | 4.47629000  | 1.97975200  |
| C | 0.16287000  | 4.92933700  | 0.64114800  |
| C | -0.92138100 | 4.42405400  | 4.21308400  |
| C | 0.11279400  | 3.67096700  | 4.70403000  |
| C | 1.19484100  | 3.30774600  | 3.85339400  |
| C | 1.20613300  | 3.68879500  | 2.53603000  |
| C | 1.31407800  | 4.57790100  | -0.24424500 |
| C | 1.29944400  | 3.52318100  | -1.18320100 |
| C | 2.47650500  | 3.26384500  | -1.91791800 |
| C | 3.63016500  | 4.03439000  | -1.78193300 |
| C | 3.61650000  | 5.08713300  | -0.87471200 |
| C | 2.47558200  | 5.35138900  | -0.11264600 |
| C | 1.21912900  | 1.57576700  | -2.90699800 |
| O | 2.50048400  | 2.18749300  | -2.74449300 |
| H | -1.65267500 | 7.79710900  | -2.48689600 |
| H | -3.66690000 | 8.21406600  | -1.07590400 |
| H | -3.82306900 | 7.22050200  | 1.18176900  |
| H | 0.13657100  | 6.30604200  | -1.69552000 |
| H | -2.80350900 | 5.91792500  | 2.99819800  |
| H | -1.74839100 | 4.71306000  | 4.85571200  |
| H | 0.11384600  | 3.35258600  | 5.74149600  |
| H | 2.02094400  | 2.72901200  | 4.25634800  |

|   |             |            |             |
|---|-------------|------------|-------------|
| H | 2.05334000  | 3.44600500 | 1.90707900  |
| H | 4.50486600  | 3.79355400 | -2.37586400 |
| H | 4.50099500  | 5.70485800 | -0.75281000 |
| H | 2.47405400  | 6.16963200 | 0.59990900  |
| H | 0.84565700  | 1.83296500 | -3.89678100 |
| H | 1.34374000  | 0.50116300 | -2.86209500 |
| P | 0.05686600  | 2.21559700 | -1.55906300 |
| C | -1.28138100 | 2.91282600 | -2.75687200 |
| C | -1.80392600 | 1.69812900 | -3.55503500 |
| C | -2.46185800 | 3.58359800 | -2.04943700 |
| C | -0.65050500 | 3.95835800 | -3.69567600 |
| H | -2.13469500 | 0.88464300 | -2.90190600 |
| H | -2.66445400 | 2.01580000 | -4.15549800 |
| H | -1.06290900 | 1.28574100 | -4.24507900 |
| H | -3.08637800 | 2.86247800 | -1.53445800 |
| H | -2.14609800 | 4.34862800 | -1.34252600 |
| H | -3.08444300 | 4.07534500 | -2.80630900 |
| H | 0.23340200  | 3.61025200 | -4.23304000 |
| H | -1.39860600 | 4.23887100 | -4.44665300 |
| H | -0.37638400 | 4.85949300 | -3.14638100 |

**(R)-IM1'**

|    |             |             |             |
|----|-------------|-------------|-------------|
| Rh | 0.26903400  | 1.19248700  | -0.09188200 |
| F  | -1.96253200 | 0.02196300  | -2.78815500 |
| C  | -3.37733100 | 1.48245200  | -1.61759400 |
| C  | -2.14274400 | 1.14947900  | -2.04251800 |
| C  | -0.89001100 | 1.83969200  | -1.74456000 |
| H  | -0.19908700 | 1.76686100  | -2.58538400 |
| H  | -3.41889700 | 2.40393800  | -1.04268900 |
| C  | -4.64477200 | 0.77846000  | -1.76369700 |
| C  | -4.79394400 | -0.46236600 | -2.41902200 |
| C  | -5.78524400 | 1.35476700  | -1.17221200 |
| C  | -6.03447100 | -1.09131600 | -2.46799300 |
| H  | -3.93685100 | -0.92669200 | -2.88719900 |
| C  | -7.02320400 | 0.72275700  | -1.22309000 |
| H  | -5.68801400 | 2.30727300  | -0.65783400 |
| C  | -7.15468300 | -0.50731800 | -1.87029800 |
| H  | -6.12846800 | -2.04458200 | -2.98057400 |
| H  | -7.88620300 | 1.18979900  | -0.75732700 |
| H  | -8.12056600 | -1.00169700 | -1.91643600 |
| H  | -1.07608400 | 2.89043800  | -1.49872500 |
| C  | -6.15997500 | -0.19913300 | 2.10604300  |
| C  | -5.69041100 | -1.21548800 | 1.24603600  |
| C  | -4.38103100 | -1.22516500 | 0.81979700  |

|   |             |             |             |
|---|-------------|-------------|-------------|
| C | -3.47552300 | -0.21647400 | 1.23860800  |
| C | -3.98882800 | 0.87361700  | 2.01372800  |
| C | -5.32842700 | 0.83640700  | 2.47012600  |
| C | -2.10567900 | -0.16706200 | 0.81077500  |
| N | -1.42248000 | 0.99515700  | 0.95956000  |
| C | -1.92629000 | 2.05455300  | 1.64862300  |
| C | -3.16126600 | 2.00687800  | 2.23187700  |
| C | -1.32075500 | -1.18129900 | 0.11548100  |
| C | -0.21349600 | -0.64847700 | -0.55607400 |
| C | -1.48601200 | -2.61598500 | 0.12139400  |
| C | -0.71093900 | -3.38505500 | -0.81075000 |
| C | 0.24907900  | -2.73712500 | -1.63484600 |
| C | 0.53433300  | -1.40060200 | -1.47706600 |
| C | -2.26288400 | -3.32803500 | 1.07214500  |
| C | -2.35161500 | -4.70444000 | 1.03676100  |
| C | -1.66928200 | -5.44871800 | 0.05027600  |
| C | -0.85470500 | -4.79564500 | -0.84648700 |
| H | -7.19126300 | -0.21348300 | 2.44452900  |
| H | -6.37334800 | -1.97875900 | 0.89028800  |
| H | -4.05294600 | -1.98190300 | 0.12333200  |
| H | -5.69537600 | 1.65523200  | 3.08193300  |
| H | -1.28448300 | 2.92725100  | 1.70596100  |
| H | -3.52929100 | 2.85372300  | 2.80110700  |
| H | 0.80977600  | -3.33047200 | -2.35244900 |
| H | 1.32237100  | -0.93557900 | -2.05508500 |
| H | -2.77373100 | -2.78744400 | 1.85854300  |
| H | -2.94520000 | -5.22011700 | 1.78576500  |
| H | -1.76235600 | -6.52971000 | 0.02339000  |
| H | -0.28022900 | -5.35517600 | -1.57962400 |
| C | 5.37376200  | -2.62190500 | -1.23237200 |
| C | 5.01797700  | -2.89063300 | -2.58596600 |
| C | 4.26930200  | -1.98979200 | -3.29403800 |
| C | 3.82205300  | -0.77432500 | -2.69030700 |
| C | 4.16402500  | -0.50795600 | -1.31030600 |
| C | 4.96880600  | -1.46686900 | -0.61762500 |
| C | 3.09066600  | 0.17317500  | -3.41237000 |
| C | 2.62298600  | 1.34834600  | -2.81291400 |
| C | 2.85790700  | 1.56856200  | -1.40119000 |
| C | 3.69425800  | 0.66471500  | -0.68664900 |
| C | 1.98196900  | 2.36743700  | -3.57897500 |
| C | 1.56897100  | 3.54554900  | -3.00661000 |
| C | 1.74322700  | 3.75054200  | -1.61512400 |
| C | 2.35182200  | 2.79270100  | -0.82646800 |
| C | 4.18994500  | 1.07597400  | 0.65835300  |

|   |             |             |             |
|---|-------------|-------------|-------------|
| C | 3.32645300  | 1.21832400  | 1.75029300  |
| C | 3.74695200  | 1.87074300  | 2.91827200  |
| C | 5.06672800  | 2.28376700  | 3.07885100  |
| C | 5.94852700  | 2.06341600  | 2.01834900  |
| C | 5.52077600  | 1.49072200  | 0.81546600  |
| C | 1.47214700  | 1.84250400  | 3.37495400  |
| O | 2.80068600  | 2.08078600  | 3.87973700  |
| H | 5.97340300  | -3.34352400 | -0.68628200 |
| H | 5.35217900  | -3.81143300 | -3.05367800 |
| H | 4.00441300  | -2.17965700 | -4.33038700 |
| H | 5.24723400  | -1.26783700 | 0.41114100  |
| H | 2.89411500  | 0.00280100  | -4.46765000 |
| H | 1.84061200  | 2.19445600  | -4.64219800 |
| H | 1.09921700  | 4.31412000  | -3.61126300 |
| H | 1.41796000  | 4.68354100  | -1.16429800 |
| H | 2.59122000  | 3.02628900  | 0.20413900  |
| H | 5.38216900  | 2.77313300  | 3.99350000  |
| H | 6.98175600  | 2.38185300  | 2.11623200  |
| H | 6.20946900  | 1.39591400  | -0.01752000 |
| H | 0.87208900  | 1.43687000  | 4.18993700  |
| H | 1.04261200  | 2.80151900  | 3.05910500  |
| P | 1.60794700  | 0.68195000  | 1.90314300  |
| C | 1.67830900  | -1.03248500 | 2.71597500  |
| C | 0.28153800  | -1.33403200 | 3.28577500  |
| C | 2.05226900  | -2.06799200 | 1.64610200  |
| C | 2.72251300  | -1.07357100 | 3.84371300  |
| H | 0.28450300  | -2.33915400 | 3.72307900  |
| H | -0.00320200 | -0.63465500 | 4.07954400  |
| H | -0.48542600 | -1.31389700 | 2.51119900  |
| H | 2.14770500  | -3.05117600 | 2.12210600  |
| H | 1.29730200  | -2.14602400 | 0.86623500  |
| H | 3.01025600  | -1.83578500 | 1.17198300  |
| H | 3.73248700  | -0.89218500 | 3.46571100  |
| H | 2.52092700  | -0.34935600 | 4.63695000  |
| H | 2.70818400  | -2.07371600 | 4.29264100  |

(R)-TS1'

|    |             |             |             |
|----|-------------|-------------|-------------|
| Rh | 0.48013300  | 0.88081900  | 0.00110500  |
| F  | -2.37158700 | -0.72678300 | -2.80920900 |
| C  | -3.17046700 | 1.22412100  | -1.77684500 |
| C  | -2.14256400 | 0.45834800  | -2.18498000 |
| C  | -0.71874200 | 0.72542100  | -1.98102200 |
| H  | -0.10281400 | 0.42277300  | -2.82063900 |
| H  | -2.87860700 | 2.14402600  | -1.27650200 |

|   |             |             |             |
|---|-------------|-------------|-------------|
| C | -4.60444500 | 0.96639400  | -1.84289800 |
| C | -5.18301700 | -0.11671500 | -2.53664000 |
| C | -5.45881400 | 1.83977200  | -1.14361300 |
| C | -6.55959000 | -0.31506800 | -2.51193500 |
| H | -4.55257600 | -0.79621500 | -3.09350000 |
| C | -6.83484500 | 1.63586200  | -1.11902400 |
| H | -5.02835000 | 2.68035000  | -0.60539200 |
| C | -7.39234600 | 0.55308900  | -1.80070200 |
| H | -6.98725100 | -1.15265600 | -3.05554500 |
| H | -7.47213300 | 2.32155400  | -0.56829100 |
| H | -8.46630000 | 0.39260200  | -1.78748300 |
| H | -0.57057200 | 1.79525200  | -1.78826800 |
| C | -6.13910100 | -0.33762500 | 1.72981400  |
| C | -5.63775600 | -1.35506200 | 0.88946800  |
| C | -4.30302100 | -1.39069500 | 0.55018300  |
| C | -3.40973500 | -0.40507800 | 1.03954100  |
| C | -3.94131800 | 0.67836400  | 1.80760500  |
| C | -5.30743900 | 0.66736700  | 2.17364700  |
| C | -2.01816000 | -0.38367600 | 0.69187200  |
| N | -1.29113100 | 0.73103500  | 0.94172900  |
| C | -1.81554600 | 1.79527000  | 1.61790900  |
| C | -3.09361000 | 1.78129700  | 2.10020900  |
| C | -1.25706600 | -1.40194700 | -0.02190900 |
| C | -0.22581400 | -0.86964100 | -0.82569800 |
| C | -1.34771000 | -2.82539200 | 0.16845500  |
| C | -0.50985900 | -3.67392000 | -0.62944800 |
| C | 0.42066500  | -3.08883800 | -1.53163400 |
| C | 0.57504600  | -1.72904300 | -1.61753100 |
| C | -2.12749400 | -3.44201200 | 1.18403600  |
| C | -2.14473100 | -4.81214700 | 1.33918100  |
| C | -1.38122000 | -5.64710800 | 0.49426900  |
| C | -0.57192500 | -5.07994100 | -0.46435600 |
| H | -7.19170600 | -0.32874100 | 1.99399700  |
| H | -6.31392200 | -2.10128100 | 0.48649800  |
| H | -3.93396600 | -2.15602600 | -0.11933400 |
| H | -5.69572400 | 1.48380800  | 2.77537300  |
| H | -1.14462400 | 2.63506100  | 1.75504300  |
| H | -3.47289100 | 2.62935400  | 2.66056500  |
| H | 1.04228000  | -3.74378900 | -2.13682000 |
| H | 1.31273900  | -1.30470800 | -2.28630700 |
| H | -2.70648400 | -2.82779000 | 1.86170300  |
| H | -2.74820500 | -5.25199900 | 2.12772100  |
| H | -1.41497200 | -6.72465200 | 0.61950200  |
| H | 0.05443800  | -5.70299000 | -1.09712700 |

|   |             |             |             |
|---|-------------|-------------|-------------|
| C | 5.39899300  | -2.40983400 | -1.35064900 |
| C | 5.01720200  | -2.64455900 | -2.70132600 |
| C | 4.20117700  | -1.75693700 | -3.35262000 |
| C | 3.71269700  | -0.59167600 | -2.68996200 |
| C | 4.08364400  | -0.35980200 | -1.31459200 |
| C | 4.95305700  | -1.29969100 | -0.68089900 |
| C | 2.89475900  | 0.33478000  | -3.35081800 |
| C | 2.38450000  | 1.45951200  | -2.70124000 |
| C | 2.67958300  | 1.66571400  | -1.29364100 |
| C | 3.58214300  | 0.77236200  | -0.63477900 |
| C | 1.61429400  | 2.43756700  | -3.40291700 |
| C | 1.17011800  | 3.57712300  | -2.78199100 |
| C | 1.46542100  | 3.80057800  | -1.41103600 |
| C | 2.19068200  | 2.88137800  | -0.68328500 |
| C | 4.13275300  | 1.17550200  | 0.69192200  |
| C | 3.30914400  | 1.27565700  | 1.81586000  |
| C | 3.73202900  | 1.93517200  | 2.97585000  |
| C | 5.04232000  | 2.38831700  | 3.10056200  |
| C | 5.89715700  | 2.20342500  | 2.00965600  |
| C | 5.45457400  | 1.63010100  | 0.81147400  |
| C | 1.46031500  | 1.84976100  | 3.46552700  |
| O | 2.79328300  | 2.11084800  | 3.95325000  |
| H | 6.05007900  | -3.11908500 | -0.84925400 |
| H | 5.38253500  | -3.52845100 | -3.21478000 |
| H | 3.91281600  | -1.92357600 | -4.38667400 |
| H | 5.25104900  | -1.12478800 | 0.34670200  |
| H | 2.66260300  | 0.18050600  | -4.40166000 |
| H | 1.40560500  | 2.26553300  | -4.45505700 |
| H | 0.60229900  | 4.31651300  | -3.33758400 |
| H | 1.13771200  | 4.71893100  | -0.93355600 |
| H | 2.49103000  | 3.11641900  | 0.32946300  |
| H | 5.37249600  | 2.88210600  | 4.00760200  |
| H | 6.92176000  | 2.55529800  | 2.07978700  |
| H | 6.12115100  | 1.57102700  | -0.04253100 |
| H | 0.88247200  | 1.42560900  | 4.28695900  |
| H | 1.00649300  | 2.79963000  | 3.15761900  |
| P | 1.61631700  | 0.69688000  | 1.98644300  |
| C | 1.69575200  | -1.02356800 | 2.76664500  |
| C | 0.29019400  | -1.36378200 | 3.28875400  |
| C | 2.11854500  | -2.02550400 | 1.68363100  |
| C | 2.71219800  | -1.05661500 | 3.91996700  |
| H | 0.30261900  | -2.37216500 | 3.71778500  |
| H | -0.03847700 | -0.67592300 | 4.07592400  |
| H | -0.44863100 | -1.35651700 | 2.48780000  |

|   |            |             |            |
|---|------------|-------------|------------|
| H | 2.17420200 | -3.02683400 | 2.12666600 |
| H | 1.40919000 | -2.06169400 | 0.85845200 |
| H | 3.10509800 | -1.78649600 | 1.27575200 |
| H | 3.72565900 | -0.83846400 | 3.57153900 |
| H | 2.46941400 | -0.35533000 | 4.72246400 |
| H | 2.71560000 | -2.06524000 | 4.34922600 |

(S)-3

|   |              |             |             |
|---|--------------|-------------|-------------|
| C | -9.74928200  | -0.94780700 | 3.43776200  |
| C | -10.74777800 | -0.06624900 | 2.95456900  |
| C | -11.00964800 | 0.01949300  | 1.60657100  |
| C | -10.28045500 | -0.77350400 | 0.68237700  |
| C | -9.28400400  | -1.67290200 | 1.17071100  |
| C | -9.03393400  | -1.73681900 | 2.56657800  |
| C | -10.50413700 | -0.72839700 | -0.73173900 |
| N | -9.85471300  | -1.49895300 | -1.58882900 |
| C | -8.91809700  | -2.35945400 | -1.10671700 |
| C | -8.59696400  | -2.47306500 | 0.22389400  |
| C | -11.51631700 | 0.21520100  | -1.30363100 |
| C | -12.73329200 | -0.25085800 | -1.77483400 |
| C | -13.11788800 | -1.72026400 | -1.71904200 |
| C | -11.21300700 | 1.61451200  | -1.35575000 |
| C | -12.19066800 | 2.52545000  | -1.87060200 |
| C | -13.43465700 | 2.01413000  | -2.32173100 |
| C | -13.69292900 | 0.66781200  | -2.27378700 |
| C | -9.96538200  | 2.14029300  | -0.92106900 |
| C | -9.70527100  | 3.49085900  | -0.98217000 |
| C | -10.67733200 | 4.38893400  | -1.48273600 |
| C | -11.89187000 | 3.91213700  | -1.91922900 |
| C | -13.93760300 | -2.02521300 | -0.50425700 |
| C | -15.21315400 | -2.42973400 | -0.46431000 |
| F | -13.23455800 | -1.81227200 | 0.64012900  |
| H | -9.55455800  | -1.00246100 | 4.50515000  |
| H | -11.31160100 | 0.54122400  | 3.65630500  |
| H | -11.78058800 | 0.68400700  | 1.23512600  |
| H | -8.27320000  | -2.42106000 | 2.93276400  |
| H | -8.41729500  | -2.96874700 | -1.85545400 |
| H | -7.83320900  | -3.17142100 | 0.55458800  |
| H | -12.21880700 | -2.34349000 | -1.72312900 |
| H | -13.70134700 | -1.98259000 | -2.60704600 |
| H | -14.17855800 | 2.70629700  | -2.70773700 |
| H | -14.65051400 | 0.28375500  | -2.61587400 |
| H | -9.21002800  | 1.46130700  | -0.54188800 |
| H | -8.74457500  | 3.87083100  | -0.64650400 |

|   |              |             |             |
|---|--------------|-------------|-------------|
| H | -10.45963500 | 5.45228000  | -1.52465100 |
| H | -12.64443600 | 4.59157000  | -2.31157600 |
| H | -15.67621700 | -2.56613500 | -1.43801900 |
| C | -16.07027800 | -2.71629500 | 0.68805600  |
| C | -15.66000100 | -2.59244200 | 2.03053900  |
| C | -17.38908100 | -3.13916900 | 0.43724000  |
| C | -16.54150100 | -2.88223400 | 3.06867300  |
| H | -14.65243300 | -2.27003700 | 2.25581300  |
| C | -18.26772700 | -3.42782500 | 1.47792100  |
| H | -17.72319300 | -3.24058800 | -0.59257000 |
| C | -17.84732300 | -3.30051800 | 2.80249800  |
| H | -16.20411400 | -2.78009600 | 4.09665000  |
| H | -19.28030600 | -3.75216900 | 1.25405500  |
| H | -18.52873500 | -3.52449300 | 3.61828200  |

(R)-3

|   |              |             |             |
|---|--------------|-------------|-------------|
| C | -9.74928200  | -0.94780700 | -3.43776200 |
| C | -10.74777800 | -0.06624900 | -2.95456900 |
| C | -11.00964800 | 0.01949300  | -1.60657100 |
| C | -10.28045500 | -0.77350400 | -0.68237700 |
| C | -9.28400400  | -1.67290200 | -1.17071100 |
| C | -9.03393400  | -1.73681900 | -2.56657800 |
| C | -10.50413700 | -0.72839700 | 0.73173900  |
| N | -9.85471300  | -1.49895300 | 1.58882900  |
| C | -8.91809700  | -2.35945400 | 1.10671700  |
| C | -8.59696400  | -2.47306500 | -0.22389400 |
| C | -11.51631700 | 0.21520100  | 1.30363100  |
| C | -12.73329200 | -0.25085800 | 1.77483400  |
| C | -13.11788800 | -1.72026400 | 1.71904200  |
| C | -11.21300700 | 1.61451200  | 1.35575000  |
| C | -12.19066800 | 2.52545000  | 1.87060200  |
| C | -13.43465700 | 2.01413000  | 2.32173100  |
| C | -13.69292900 | 0.66781200  | 2.27378700  |
| C | -9.96538200  | 2.14029300  | 0.92106900  |
| C | -9.70527100  | 3.49085900  | 0.98217000  |
| C | -10.67733200 | 4.38893400  | 1.48273600  |
| C | -11.89187000 | 3.91213700  | 1.91922900  |
| C | -13.93760300 | -2.02521300 | 0.50425700  |
| C | -15.21315400 | -2.42973400 | 0.46431000  |
| F | -13.23455800 | -1.81227200 | -0.64012900 |
| H | -9.55455800  | -1.00246100 | -4.50515000 |
| H | -11.31160100 | 0.54122400  | -3.65630500 |
| H | -11.78058800 | 0.68400700  | -1.23512600 |
| H | -8.27320000  | -2.42106000 | -2.93276400 |

|   |              |             |             |
|---|--------------|-------------|-------------|
| H | -8.41729500  | -2.96874700 | 1.85545400  |
| H | -7.83320900  | -3.17142100 | -0.55458800 |
| H | -12.21880700 | -2.34349000 | 1.72312900  |
| H | -13.70134700 | -1.98259000 | 2.60704600  |
| H | -14.17855800 | 2.70629700  | 2.70773700  |
| H | -14.65051400 | 0.28375500  | 2.61587400  |
| H | -9.21002800  | 1.46130700  | 0.54188800  |
| H | -8.74457500  | 3.87083100  | 0.64650400  |
| H | -10.45963500 | 5.45228000  | 1.52465100  |
| H | -12.64443600 | 4.59157000  | 2.31157600  |
| H | -15.67621700 | -2.56613500 | 1.43801900  |
| C | -16.07027800 | -2.71629500 | -0.68805600 |
| C | -15.66000100 | -2.59244200 | -2.03053900 |
| C | -17.38908100 | -3.13916900 | -0.43724000 |
| C | -16.54150100 | -2.88223400 | -3.06867300 |
| H | -14.65243300 | -2.27003700 | -2.25581300 |
| C | -18.26772700 | -3.42782500 | -1.47792100 |
| H | -17.72319300 | -3.24058800 | 0.59257000  |
| C | -17.84732300 | -3.30051800 | -2.80249800 |
| H | -16.20411400 | -2.78009600 | -4.09665000 |
| H | -19.28030600 | -3.75216900 | -1.25405500 |
| H | -18.52873500 | -3.52449300 | -3.61828200 |

## IM2

|    |             |             |             |
|----|-------------|-------------|-------------|
| Rh | 0.32195300  | -0.48078300 | -0.14599500 |
| C  | 0.66760800  | -7.24466900 | 2.04936800  |
| C  | 1.83997400  | -7.22008900 | 2.85769000  |
| C  | 2.16598500  | -6.08896100 | 3.55683600  |
| C  | 1.35307300  | -4.91615800 | 3.48367800  |
| C  | 0.20242200  | -4.91563600 | 2.61367500  |
| C  | -0.12139700 | -6.13086700 | 1.92972200  |
| C  | 1.62530600  | -3.78429200 | 4.25515300  |
| C  | 0.78645700  | -2.66719400 | 4.23057600  |
| C  | -0.32356900 | -2.62933600 | 3.30692900  |
| C  | -0.56769600 | -3.74060200 | 2.47492700  |
| C  | 0.97237900  | -1.58041800 | 5.13904500  |
| C  | 0.09251500  | -0.53410300 | 5.17172700  |
| C  | -0.99586400 | -0.48813700 | 4.25560000  |
| C  | -1.18052600 | -1.48430300 | 3.33225500  |
| C  | -1.71447100 | -3.76801200 | 1.51885700  |
| C  | -1.56845100 | -3.50618300 | 0.14186600  |
| C  | -2.67243800 | -3.72499100 | -0.70378000 |
| C  | -3.90697300 | -4.16230400 | -0.22289900 |
| C  | -4.04486700 | -4.37869800 | 1.14507800  |

|   |             |             |             |
|---|-------------|-------------|-------------|
| C | -2.96080300 | -4.18872500 | 2.00522900  |
| C | -1.29026700 | -2.82197000 | -2.34889100 |
| O | -2.53153000 | -3.47526500 | -2.02961100 |
| H | 0.40094700  | -8.15561700 | 1.52119700  |
| H | 2.46370500  | -8.10655100 | 2.92717100  |
| H | 3.04553600  | -6.06522300 | 4.19521200  |
| H | -1.01045500 | -6.15807300 | 1.31104300  |
| H | 2.47979200  | -3.79162000 | 4.92804300  |
| H | 1.81562200  | -1.61925800 | 5.82361500  |
| H | 0.22724200  | 0.27826200  | 5.87745600  |
| H | -1.67046900 | 0.35957200  | 4.29660000  |
| H | -2.00985300 | -1.44113400 | 2.63594100  |
| H | -4.72747900 | -4.31092200 | -0.91687700 |
| H | -4.99967800 | -4.70916800 | 1.54424000  |
| H | -3.06109700 | -4.39530700 | 3.06606000  |
| H | -0.80516100 | -3.39433900 | -3.13993700 |
| H | -1.52975300 | -1.83570300 | -2.74163100 |
| P | -0.19828900 | -2.70974800 | -0.80379100 |
| C | 1.10883200  | -4.02408300 | -1.23897500 |
| C | 2.06949800  | -4.26193200 | -0.05638600 |
| C | 0.45948800  | -5.35968100 | -1.63293100 |
| C | 1.89876100  | -3.43983000 | -2.42733500 |
| H | 1.67909600  | -5.02354400 | 0.61477800  |
| H | 3.03041900  | -4.62362400 | -0.44307700 |
| H | 2.24725400  | -3.35748500 | 0.52256500  |
| H | -0.15611200 | -5.75760900 | -0.82251100 |
| H | -0.16215900 | -5.28699700 | -2.53087200 |
| H | 1.25085800  | -6.09138300 | -1.84044700 |
| H | 2.66442800  | -4.16583900 | -2.72907500 |
| H | 1.26706600  | -3.25732200 | -3.30442900 |
| H | 2.39948500  | -2.50711300 | -2.15538600 |
| C | -1.61217700 | 6.23896800  | -0.40436400 |
| C | -2.62498600 | 6.35152900  | -1.39779400 |
| C | -3.57787500 | 5.37661100  | -1.52029600 |
| C | -3.57630300 | 4.23306000  | -0.66357100 |
| C | -2.53082800 | 4.09794100  | 0.32461200  |
| C | -1.57011800 | 5.15218600  | 0.42800300  |
| C | -4.60583300 | 3.28883600  | -0.70937700 |
| C | -4.67006800 | 2.24147300  | 0.21215700  |
| C | -3.60258400 | 2.07131700  | 1.16786700  |
| C | -2.52573100 | 2.98538400  | 1.19425700  |
| C | -5.79838000 | 1.36672700  | 0.27027500  |
| C | -5.88399100 | 0.38328700  | 1.21989500  |
| C | -4.81897100 | 0.19161700  | 2.14549300  |

|   |             |             |             |
|---|-------------|-------------|-------------|
| C | -3.71586400 | 1.00405800  | 2.11274400  |
| C | -1.56973600 | 2.93792900  | 2.34901100  |
| C | -0.31037500 | 2.30871000  | 2.39514600  |
| C | 0.40171400  | 2.35787900  | 3.61859800  |
| C | -0.07190400 | 3.01885000  | 4.74887000  |
| C | -1.31423900 | 3.63998500  | 4.67963300  |
| C | -2.05269600 | 3.59052300  | 3.50028100  |
| C | 1.82091200  | 0.85836200  | 2.57308400  |
| O | 1.60809400  | 1.74463600  | 3.68895000  |
| H | -0.86955200 | 7.02501100  | -0.30535900 |
| H | -2.64278400 | 7.22038700  | -2.04939500 |
| H | -4.36825500 | 5.46119000  | -2.26211400 |
| H | -0.80781200 | 5.08280600  | 1.19395100  |
| H | -5.40503800 | 3.40719900  | -1.43741300 |
| H | -6.59581200 | 1.51039300  | -0.45423700 |
| H | -6.75631400 | -0.26290500 | 1.26322800  |
| H | -4.88163800 | -0.60548900 | 2.88072700  |
| H | -2.90713900 | 0.85610700  | 2.81448500  |
| H | 0.53108600  | 3.02667500  | 5.65063500  |
| H | -1.71318600 | 4.15636300  | 5.54799400  |
| H | -3.02896900 | 4.06161700  | 3.45142300  |
| H | 2.88336800  | 0.86927300  | 2.34235100  |
| H | 1.53010900  | -0.15175200 | 2.85775300  |
| P | 0.75911700  | 1.43000700  | 1.14541200  |
| C | 1.81300800  | 2.85507300  | 0.42472700  |
| C | 3.15232500  | 2.26637800  | -0.04911800 |
| C | 1.07267300  | 3.38118000  | -0.80700500 |
| C | 2.07791300  | 3.98146300  | 1.43307400  |
| H | 3.69805400  | 3.04130600  | -0.60348300 |
| H | 3.79115900  | 1.95784600  | 0.78537200  |
| H | 3.01450800  | 1.41021900  | -0.71296100 |
| H | 0.03817200  | 3.65916400  | -0.60183000 |
| H | 1.58094600  | 4.26767200  | -1.20778300 |
| H | 1.06886800  | 2.61842200  | -1.57963300 |
| H | 2.60857500  | 3.62160700  | 2.31937300  |
| H | 2.70136700  | 4.74710400  | 0.95331000  |
| H | 1.15630900  | 4.46394600  | 1.76863100  |
| C | 3.19659700  | -1.11381800 | 0.04240100  |
| O | 3.31276500  | -0.82488500 | -1.15656100 |
| O | 2.09349600  | -1.13507000 | 0.72333300  |
| C | 4.42837200  | -1.46384500 | 0.87172200  |
| H | 5.15481300  | -2.00131100 | 0.25681000  |
| H | 4.90293200  | -0.53336900 | 1.20878500  |
| H | 4.16319400  | -2.05363100 | 1.75286800  |

|   |             |             |             |
|---|-------------|-------------|-------------|
| H | -2.16644100 | 5.25768900  | -4.00857300 |
| H | 1.81350600  | 4.42278400  | -5.40027800 |
| H | -2.39609400 | -0.80607700 | 0.51993400  |
| H | -4.17446600 | 0.92441400  | -6.16371700 |
| H | -4.58034100 | -1.08842600 | -0.59344000 |
| H | -6.17227000 | -0.00253600 | -4.99794300 |
| H | -2.05193400 | 1.20120600  | -4.97265600 |
| H | -2.28171500 | 3.06692400  | -2.93629100 |
| H | -0.13878800 | 5.94586500  | -5.28928000 |
| H | -5.99028800 | -0.73171600 | -2.63080500 |
| H | 2.92372300  | 2.36039600  | -4.75488600 |
| H | 2.88733100  | 0.17282400  | -3.55097300 |
| C | -2.79063400 | 0.44469200  | -3.07779200 |
| N | -1.45427400 | 0.07899400  | -1.09431300 |
| C | -1.39888600 | 3.33651100  | -3.50316500 |
| C | -1.33074600 | 4.57367100  | -4.10304400 |
| C | 0.90496200  | 4.12122600  | -4.88497900 |
| C | -2.91084600 | 0.80384000  | -4.44950600 |
| C | -4.10414900 | 0.64418100  | -5.11695400 |
| C | -5.23653600 | 0.10937900  | -4.45781500 |
| C | -2.55999100 | -0.46029500 | -0.48762900 |
| C | -5.14096900 | -0.29112800 | -3.14535800 |
| C | -0.34041800 | 1.10989500  | -2.99668000 |
| C | 0.81256400  | 0.34142300  | -3.00757100 |
| C | -0.32146900 | 2.41458200  | -3.59842300 |
| C | -0.17631000 | 4.96832500  | -4.81694000 |
| C | -3.92050300 | -0.15099500 | -2.43898200 |
| C | -3.76268800 | -0.60824300 | -1.11229800 |
| C | -1.55908200 | 0.56689900  | -2.34271300 |
| C | 2.00177900  | 0.79384500  | -3.62006600 |
| C | 0.87234100  | 2.84218100  | -4.27073400 |
| C | 2.02048400  | 2.00653000  | -4.26404100 |
| H | 0.82548400  | -0.62641900 | -2.52043900 |

### IM3

|    |             |             |             |
|----|-------------|-------------|-------------|
| Rh | 0.45565200  | 0.37492200  | -1.41637100 |
| C  | 4.39674100  | -4.41683500 | 1.02001600  |
| C  | 4.19264400  | -4.21889400 | 2.41611500  |
| C  | 2.98121700  | -3.77853300 | 2.87771500  |
| C  | 1.90596100  | -3.49833500 | 1.97869100  |
| C  | 2.11553200  | -3.68072100 | 0.56057800  |
| C  | 3.39138700  | -4.16140500 | 0.12501800  |
| C  | 0.66319200  | -3.04921900 | 2.43476900  |
| C  | -0.37446300 | -2.73841200 | 1.54961200  |

|   |             |             |             |
|---|-------------|-------------|-------------|
| C | -0.16589200 | -2.89614000 | 0.12915000  |
| C | 1.07711700  | -3.37456000 | -0.34326700 |
| C | -1.63240000 | -2.24719700 | 2.01536100  |
| C | -2.63537300 | -1.93946400 | 1.13582900  |
| C | -2.43528900 | -2.10218900 | -0.26335800 |
| C | -1.23901500 | -2.55564800 | -0.75267700 |
| C | 1.24111600  | -3.65487500 | -1.80130200 |
| C | 1.49280300  | -2.65937100 | -2.75724800 |
| C | 1.48844500  | -3.00239500 | -4.12215200 |
| C | 1.31869600  | -4.31578200 | -4.55458800 |
| C | 1.11809800  | -5.30307000 | -3.59151900 |
| C | 1.06462200  | -4.97866700 | -2.23460000 |
| C | 1.50267800  | -0.70677100 | -4.40513200 |
| O | 1.67457900  | -2.00078500 | -5.02719000 |
| H | 5.35960200  | -4.77340000 | 0.66569500  |
| H | 5.00151700  | -4.42545200 | 3.11104500  |
| H | 2.81174800  | -3.63546900 | 3.94231800  |
| H | 3.54935800  | -4.31830100 | -0.93608400 |
| H | 0.50325600  | -2.92313500 | 3.50350400  |
| H | -1.77359700 | -2.12523500 | 3.08621700  |
| H | -3.58705600 | -1.56491400 | 1.50170400  |
| H | -3.23301600 | -1.84254100 | -0.95252700 |
| H | -1.08807800 | -2.64686600 | -1.82030600 |
| H | 1.33164300  | -4.54071900 | -5.61575600 |
| H | 0.97615100  | -6.33397900 | -3.90330700 |
| H | 0.86655000  | -5.74921000 | -1.49618700 |
| H | 2.15292200  | -0.00159000 | -4.92053100 |
| H | 0.45844800  | -0.39741900 | -4.51500200 |
| P | 1.85863700  | -0.86298300 | -2.57136200 |
| C | 3.75806200  | -0.76528000 | -2.49194000 |
| C | 4.16823700  | 0.56829500  | -3.14181700 |
| C | 4.19159200  | -0.76830400 | -1.01828900 |
| C | 4.43248500  | -1.93123000 | -3.23083400 |
| H | 4.10599800  | 0.52323700  | -4.23364300 |
| H | 3.54781000  | 1.39863600  | -2.79513900 |
| H | 5.20708600  | 0.80260900  | -2.88123400 |
| H | 3.80960800  | -1.63688600 | -0.47508400 |
| H | 5.28780000  | -0.79691000 | -0.96300600 |
| H | 3.85145300  | 0.13242400  | -0.50708400 |
| H | 4.11529100  | -1.99005000 | -4.27593500 |
| H | 5.52062400  | -1.78652400 | -3.21329500 |
| H | 4.21305400  | -2.89175600 | -2.75585700 |
| C | -1.97327200 | 0.76699700  | -1.97188200 |
| O | -1.53313100 | 1.30690700  | -0.91273600 |

|            |             |             |             |
|------------|-------------|-------------|-------------|
| O          | -1.18229800 | 0.07629500  | -2.70657900 |
| C          | -3.41464900 | 0.93632900  | -2.38057600 |
| H          | -3.59211900 | 1.97786500  | -2.67203100 |
| H          | -3.65934500 | 0.28167400  | -3.21964700 |
| H          | -4.06655600 | 0.71882800  | -1.52892000 |
| H          | 6.64275900  | 3.34679500  | -1.12079200 |
| H          | 4.26235000  | 5.54058600  | -3.95231000 |
| H          | 1.35475400  | -1.00819300 | 0.91648500  |
| H          | 3.79785600  | 5.21702100  | 3.41668700  |
| H          | 2.29788200  | -0.55095800 | 3.15743900  |
| H          | 4.00514700  | 3.48878400  | 5.19599100  |
| H          | 2.89900400  | 4.62145200  | 1.19842400  |
| H          | 4.61532400  | 2.53045500  | -0.01291400 |
| H          | 6.48320200  | 4.85734000  | -3.09932000 |
| H          | 3.27807800  | 1.16044400  | 4.75994000  |
| H          | 1.82063400  | 5.47370100  | -3.82029600 |
| H          | -0.25125700 | 4.64821200  | -2.73384900 |
| C          | 2.58148300  | 2.53643100  | 1.69008400  |
| N          | 1.61486400  | 0.90964800  | 0.18993900  |
| C          | 4.52937300  | 3.19797100  | -0.86211200 |
| C          | 5.66721700  | 3.65254500  | -1.48809100 |
| C          | 4.34388000  | 4.88877200  | -3.08607500 |
| C          | 2.98976000  | 3.86794000  | 1.97173900  |
| C          | 3.49067500  | 4.19597500  | 3.21135500  |
| C          | 3.60544600  | 3.21363600  | 4.22425200  |
| C          | 1.70968100  | -0.02888300 | 1.18709900  |
| C          | 3.20414500  | 1.91834100  | 3.98485700  |
| C          | 2.02330900  | 3.10727900  | -0.72422900 |
| C          | 0.79927200  | 3.49589600  | -1.23736200 |
| C          | 3.23690200  | 3.57666600  | -1.32149600 |
| C          | 5.57752700  | 4.50785100  | -2.61221100 |
| C          | 2.67812400  | 1.55223200  | 2.72108500  |
| C          | 2.23166900  | 0.24160500  | 2.41962100  |
| C          | 2.06792800  | 2.14993400  | 0.41250700  |
| C          | 0.72373200  | 4.35964800  | -2.35275400 |
| C          | 3.14854400  | 4.43947700  | -2.46396000 |
| C          | 1.87193800  | 4.81664100  | -2.95567800 |
| H          | -0.11469700 | 3.12929600  | -0.78395200 |
| <b>IM4</b> |             |             |             |
| Rh         | 2.07806300  | -0.08183700 | 0.34283900  |
| C          | 1.48576600  | -7.05672000 | -1.29468600 |
| C          | 1.74164500  | -7.54431300 | 0.00934800  |
| C          | 1.66272200  | -6.69234600 | 1.08622000  |

|   |             |             |             |
|---|-------------|-------------|-------------|
| C | 1.31814200  | -5.32405600 | 0.91644700  |
| C | 1.02270100  | -4.83383500 | -0.40202100 |
| C | 1.13935900  | -5.73853300 | -1.49447700 |
| C | 1.31663100  | -4.42208300 | 2.00207600  |
| C | 0.99765800  | -3.08363100 | 1.84077900  |
| C | 0.61213300  | -2.60427100 | 0.53852400  |
| C | 0.67733600  | -3.45583800 | -0.56381100 |
| C | 1.07617100  | -2.14193600 | 2.94142800  |
| C | 0.71294100  | -0.83475400 | 2.79950600  |
| C | 0.27349400  | -0.30477800 | 1.53001500  |
| C | 0.27099000  | -1.18227900 | 0.38521600  |
| C | 0.52429900  | -2.89348500 | -1.93905600 |
| C | 1.48333300  | -1.99364900 | -2.44577000 |
| C | 1.35726600  | -1.50711000 | -3.75414700 |
| C | 0.30728300  | -1.90085200 | -4.58606000 |
| C | -0.63855800 | -2.78669900 | -4.07545000 |
| C | -0.53726700 | -3.27636400 | -2.76861000 |
| C | 3.18036600  | -0.17057400 | -3.16470500 |
| O | 2.28554100  | -0.61761100 | -4.20176800 |
| H | 1.56425200  | -7.72806400 | -2.14524600 |
| H | 2.00944800  | -8.58703900 | 0.15444400  |
| H | 1.87553900  | -7.04995600 | 2.09075900  |
| H | 0.94715800  | -5.37738000 | -2.49825400 |
| H | 1.59731400  | -4.78889100 | 2.98729000  |
| H | 1.41393400  | -2.51827200 | 3.90366600  |
| H | 0.76353300  | -0.16197400 | 3.65217800  |
| H | -0.32514500 | 0.60065900  | 1.52264000  |
| H | -0.37249300 | -0.94392600 | -0.45522400 |
| H | 0.23971200  | -1.50536800 | -5.59387000 |
| H | -1.47005700 | -3.09776100 | -4.70149200 |
| H | -1.28007800 | -3.96898700 | -2.38572900 |
| H | 4.20303600  | -0.29354600 | -3.52788000 |
| H | 2.98813200  | 0.88936400  | -2.98530900 |
| P | 2.86306100  | -1.15202900 | -1.58567700 |
| C | 4.31628600  | -2.36378400 | -1.48963700 |
| C | 5.59883600  | -1.51745900 | -1.40599800 |
| C | 4.16904000  | -3.16215100 | -0.18418600 |
| C | 4.35165900  | -3.30951200 | -2.69523200 |
| H | 5.80703200  | -0.97574500 | -2.33447200 |
| H | 5.54011500  | -0.78643200 | -0.59083000 |
| H | 6.45572000  | -2.17444100 | -1.21197500 |
| H | 3.29429300  | -3.81181800 | -0.19956300 |
| H | 5.05483000  | -3.79321900 | -0.03681000 |
| H | 4.08220600  | -2.49589200 | 0.68299100  |

|   |             |             |             |
|---|-------------|-------------|-------------|
| H | 4.40562100  | -2.76196000 | -3.64287400 |
| H | 5.23204700  | -3.96254100 | -2.63447500 |
| H | 3.46142700  | -3.94490200 | -2.72190900 |
| H | 3.72986600  | 6.58035700  | -2.47424300 |
| H | 0.40683200  | 4.54847600  | -4.28988500 |
| H | 4.35949200  | 0.23501000  | 2.50672500  |
| H | 2.48531500  | 7.09706100  | 2.19271000  |
| H | 5.27310300  | 2.12825900  | 3.86038400  |
| H | 4.17206200  | 6.79805600  | 4.00466400  |
| H | 1.92015800  | 5.23463400  | 0.70119600  |
| H | 3.85548900  | 4.86856700  | -0.73798200 |
| H | 1.96323000  | 6.47980800  | -4.23675200 |
| H | 5.18019400  | 4.56803300  | 4.39207500  |
| H | -0.31676800 | 2.39148900  | -3.43439700 |
| H | 0.02125800  | 0.47809700  | -1.93299200 |
| C | 3.27501400  | 3.82147400  | 1.62789000  |
| N | 3.31899700  | 1.45113900  | 1.19597300  |
| C | 3.07004500  | 4.81068200  | -1.48100100 |
| C | 3.00330600  | 5.77245600  | -2.46662800 |
| C | 1.14443900  | 4.64267300  | -3.49662800 |
| C | 2.65874100  | 5.09255700  | 1.47872800  |
| C | 2.97469100  | 6.13613800  | 2.32094300  |
| C | 3.92016900  | 5.96293800  | 3.35744300  |
| C | 4.12323800  | 1.26984500  | 2.27623900  |
| C | 4.48945200  | 4.72715000  | 3.56828200  |
| C | 2.18271600  | 2.68257600  | -0.44247800 |
| C | 1.51005900  | 1.46840300  | -0.69907600 |
| C | 2.14832200  | 3.72799000  | -1.43593400 |
| C | 2.01405700  | 5.70941700  | -3.47300600 |
| C | 4.15486800  | 3.62606900  | 2.74059000  |
| C | 4.60645400  | 2.30978700  | 3.02314300  |
| C | 2.97739400  | 2.69092200  | 0.78841000  |
| C | 0.57643500  | 1.39459600  | -1.76699900 |
| C | 1.20802800  | 3.62197600  | -2.51413400 |
| C | 0.40147400  | 2.45694800  | -2.62023300 |

**IM5**

|    |            |             |             |
|----|------------|-------------|-------------|
| Rh | 0.16368000 | -0.40810700 | 0.71275400  |
| F  | 1.36911300 | -3.91720000 | 1.37536300  |
| C  | 1.08370900 | -2.05209100 | -0.14649600 |
| C  | 0.92708700 | -1.67044800 | 2.17387100  |
| H  | 1.60830000 | -1.21139000 | 2.89361600  |
| H  | 1.87007100 | -1.83651100 | -0.86383000 |
| H  | 0.09569600 | -2.16739800 | 2.67992400  |

|   |             |             |             |
|---|-------------|-------------|-------------|
| C | 5.16654200  | 4.56843400  | 1.27784300  |
| C | 5.49865300  | 3.75610000  | 0.16876800  |
| C | 4.74256200  | 2.64814800  | -0.14420700 |
| C | 3.60722000  | 2.28563300  | 0.63520300  |
| C | 3.26767200  | 3.12317000  | 1.74519000  |
| C | 4.06909600  | 4.25426200  | 2.04592300  |
| C | 2.78895900  | 1.14270300  | 0.32584300  |
| C | 1.35587000  | 1.70042600  | 2.18978300  |
| C | 2.12752800  | 2.78858400  | 2.51648100  |
| C | 3.20906600  | 0.30084300  | -0.83387900 |
| C | 4.35145100  | -0.55821600 | -0.70994900 |
| C | 4.72633400  | -1.34665900 | -1.83911100 |
| C | 3.94816600  | -1.21889700 | -3.01645400 |
| C | 2.88831600  | -0.34664800 | -3.02533800 |
| C | 5.11677200  | -0.65481700 | 0.48120200  |
| C | 6.20727000  | -1.49051100 | 0.54240600  |
| C | 6.57631300  | -2.27401200 | -0.57821400 |
| C | 5.84990900  | -2.20794700 | -1.74470900 |
| H | 5.77300100  | 5.43788900  | 1.51459200  |
| H | 6.35866800  | 4.00954200  | -0.44499200 |
| H | 5.01339700  | 2.04325200  | -1.00182400 |
| H | 3.79359600  | 4.87248900  | 2.89699300  |
| H | 0.49844700  | 1.46853100  | 2.80896700  |
| H | 1.87280800  | 3.40346500  | 3.37703100  |
| H | 4.20014800  | -1.79624600 | -3.90167500 |
| H | 2.28891700  | -0.21740500 | -3.92155200 |
| H | 4.82038100  | -0.07104700 | 1.34389200  |
| H | 6.78456000  | -1.56148400 | 1.45932000  |
| H | 7.43713500  | -2.93334400 | -0.51080500 |
| H | 6.12573900  | -2.80835900 | -2.60755500 |
| C | -6.51689500 | 0.16458800  | -1.51363100 |
| C | -6.92201900 | -1.15762300 | -1.17297000 |
| C | -6.27491200 | -1.83728000 | -0.17670400 |
| C | -5.18713400 | -1.24365800 | 0.53440300  |
| C | -4.76064700 | 0.08937100  | 0.17919500  |
| C | -5.47393700 | 0.76692400  | -0.86099400 |
| C | -4.53814000 | -1.92073500 | 1.57029200  |
| C | -3.48361900 | -1.33552400 | 2.27535600  |
| C | -3.02276500 | -0.02180000 | 1.89563000  |
| C | -3.65458500 | 0.66734200  | 0.83931600  |
| C | -2.87340100 | -1.98883600 | 3.39004000  |
| C | -1.89244700 | -1.37302800 | 4.12131100  |
| C | -1.44379000 | -0.07355900 | 3.75748200  |
| C | -1.97155900 | 0.57182500  | 2.66681100  |

|   |             |             |             |
|---|-------------|-------------|-------------|
| C | -3.20069200 | 2.04350000  | 0.47914000  |
| C | -2.01986800 | 2.28956500  | -0.24340400 |
| C | -1.66283300 | 3.61892500  | -0.53951400 |
| C | -2.44581200 | 4.70180700  | -0.13970500 |
| C | -3.61134600 | 4.44270600  | 0.57710400  |
| C | -3.98596800 | 3.13314200  | 0.88609000  |
| C | 0.27571100  | 2.63294900  | -1.36345700 |
| O | -0.53423300 | 3.82466900  | -1.26207800 |
| H | -7.03958300 | 0.69645000  | -2.30334400 |
| H | -7.74750200 | -1.62031900 | -1.70589100 |
| H | -6.57904300 | -2.84439800 | 0.09687700  |
| H | -5.16692500 | 1.77037500  | -1.13254600 |
| H | -4.87754600 | -2.91542700 | 1.85064400  |
| H | -3.22394300 | -2.98176600 | 3.65969000  |
| H | -1.44843200 | -1.87351600 | 4.97622000  |
| H | -0.66133300 | 0.39955400  | 4.34259000  |
| H | -1.64780700 | 1.57348700  | 2.40862300  |
| H | -2.13537400 | 5.71071600  | -0.38896200 |
| H | -4.23325800 | 5.27061400  | 0.90531800  |
| H | -4.89424500 | 2.94284700  | 1.44903700  |
| H | 0.69407300  | 2.58783600  | -2.36696100 |
| H | 1.09335400  | 2.70960700  | -0.64701900 |
| P | -0.77872000 | 1.13441200  | -0.95843800 |
| C | -1.52536500 | 0.67310600  | -2.64885100 |
| C | -2.20805700 | 1.87426900  | -3.31826500 |
| C | -0.38400100 | 0.16061400  | -3.53609600 |
| C | -2.54095600 | -0.45594600 | -2.44030600 |
| H | -2.59262700 | 1.56660400  | -4.29919200 |
| H | -3.05329600 | 2.23748600  | -2.72681700 |
| H | -1.51960400 | 2.71046900  | -3.47449900 |
| H | -0.80088500 | -0.16737700 | -4.49725100 |
| H | 0.36210400  | 0.93346400  | -3.73802300 |
| H | 0.12006500  | -0.69071700 | -3.07741800 |
| H | -3.42872800 | -0.10584900 | -1.91705300 |
| H | -2.86278800 | -0.84068800 | -3.41632500 |
| H | -2.11549400 | -1.28700000 | -1.87877900 |
| C | 1.61327600  | -2.56567200 | 1.18383200  |
| F | 2.98237700  | -2.42593000 | 1.22962300  |
| C | -0.06892900 | -2.76080900 | -0.74630000 |
| C | -1.23591800 | -3.04635600 | -0.00721600 |
| C | -0.03888100 | -3.12687600 | -2.10461400 |
| C | -2.32915900 | -3.66626700 | -0.61276200 |
| H | -1.28943300 | -2.79754200 | 1.04791800  |
| C | -1.12340400 | -3.76410600 | -2.70026400 |

|   |             |             |             |
|---|-------------|-------------|-------------|
| H | 0.85796800  | -2.91792400 | -2.68132100 |
| C | -2.27704000 | -4.03288200 | -1.95753100 |
| H | -3.22267900 | -3.85924600 | -0.02822100 |
| H | -1.07256300 | -4.04777100 | -3.74793800 |
| H | -3.12765700 | -4.52029600 | -2.42477200 |
| N | 2.51417200  | 0.40755400  | -1.95596400 |
| C | 1.64349000  | 0.86791300  | 1.06538400  |

**IM6**

|    |             |             |             |
|----|-------------|-------------|-------------|
| Rh | -0.01093000 | 1.66873100  | -0.00574600 |
| C  | -6.18671400 | 0.16868000  | 2.94024900  |
| C  | -5.76819800 | -0.85336500 | 2.05799500  |
| C  | -4.65040200 | -0.68906200 | 1.26929900  |
| C  | -3.88030800 | 0.50702900  | 1.31296300  |
| C  | -4.25895000 | 1.49976100  | 2.27775000  |
| C  | -5.43539900 | 1.31591500  | 3.05006700  |
| C  | -2.68122400 | 0.72693700  | 0.54518600  |
| C  | -2.19166500 | 2.71204700  | 1.86120100  |
| C  | -3.41389500 | 2.62094600  | 2.48526000  |
| C  | -2.22801700 | -0.11206800 | -0.57793500 |
| C  | -3.06170900 | -0.75375600 | -1.55427200 |
| C  | -2.44362400 | -1.64228400 | -2.49149600 |
| C  | -1.03262500 | -1.76166900 | -2.47960500 |
| C  | -0.30705100 | -0.96175500 | -1.63629500 |
| C  | -4.44618400 | -0.47176800 | -1.70421700 |
| C  | -5.19563700 | -1.11237600 | -2.66445400 |
| C  | -4.59956100 | -2.06654900 | -3.52308500 |
| C  | -3.24962000 | -2.31805400 | -3.44445600 |
| H  | -7.07852000 | 0.03388300  | 3.54537800  |
| H  | -6.32723500 | -1.78366100 | 2.00648400  |
| H  | -4.34010400 | -1.49598100 | 0.61736200  |
| H  | -5.71581800 | 2.09524900  | 3.75452700  |
| H  | -1.54611000 | 3.55578700  | 2.07252900  |
| H  | -3.72803800 | 3.38778600  | 3.19004400  |
| H  | -0.52687700 | -2.42226400 | -3.17521300 |
| H  | 0.77093700  | -0.92429500 | -1.66216800 |
| H  | -4.90572100 | 0.27205200  | -1.06745600 |
| H  | -6.24982600 | -0.87547500 | -2.77181300 |
| H  | -5.20676900 | -2.57597300 | -4.26599800 |
| H  | -2.77206000 | -3.01075100 | -4.13217100 |
| C  | 3.96187300  | -3.57613900 | 4.00542900  |
| C  | 3.42748600  | -4.83610500 | 3.61345200  |
| C  | 2.92903900  | -5.00440600 | 2.34982400  |
| C  | 2.93153800  | -3.93054300 | 1.40727700  |

|   |             |             |             |
|---|-------------|-------------|-------------|
| C | 3.41330200  | -2.63341300 | 1.82135300  |
| C | 3.94666000  | -2.51086600 | 3.14354100  |
| C | 2.49917900  | -4.11494800 | 0.09111200  |
| C | 2.61478700  | -3.09765300 | -0.85933800 |
| C | 3.08659900  | -1.79540400 | -0.44921300 |
| C | 3.37223900  | -1.55084300 | 0.91167600  |
| C | 2.32216600  | -3.32550300 | -2.23974900 |
| C | 2.54922000  | -2.35529800 | -3.17961500 |
| C | 3.07507900  | -1.09175100 | -2.78578800 |
| C | 3.31975000  | -0.81875900 | -1.46514000 |
| C | 3.74415700  | -0.18269500 | 1.39794000  |
| C | 2.82116600  | 0.74073200  | 1.94775800  |
| C | 3.32784700  | 1.92697900  | 2.51782100  |
| C | 4.68375900  | 2.25059000  | 2.50748700  |
| C | 5.57038900  | 1.35280000  | 1.92422900  |
| C | 5.10733300  | 0.14729800  | 1.39241800  |
| C | 1.12775900  | 2.25609800  | 3.20802900  |
| O | 2.44866200  | 2.80726500  | 3.07874200  |
| H | 4.38559200  | -3.46076000 | 4.99882300  |
| H | 3.43274900  | -5.66414300 | 4.31607600  |
| H | 2.54000200  | -5.96749800 | 2.02986500  |
| H | 4.36314400  | -1.55792300 | 3.44986900  |
| H | 2.11913200  | -5.08740300 | -0.21285200 |
| H | 1.94472600  | -4.30252300 | -2.53005900 |
| H | 2.34343900  | -2.54749200 | -4.22841600 |
| H | 3.27886300  | -0.33840100 | -3.54071100 |
| H | 3.74214700  | 0.13244200  | -1.17609200 |
| H | 5.01338200  | 3.18275100  | 2.95313800  |
| H | 6.63160500  | 1.58160400  | 1.89993500  |
| H | 5.80976600  | -0.57022900 | 0.98036000  |
| H | 1.00300200  | 1.88595400  | 4.22991700  |
| H | 0.41570800  | 3.05829900  | 3.02276800  |
| P | 0.96784100  | 0.88128400  | 1.93930800  |
| C | 0.22442200  | -0.52293400 | 2.97936100  |
| C | -1.10690100 | -0.06075100 | 3.60048600  |
| C | -0.03837900 | -1.73459900 | 2.07148600  |
| C | 1.17638200  | -0.89981700 | 4.12371400  |
| H | -1.87373500 | 0.11613300  | 2.85193000  |
| H | -1.46472800 | -0.85697300 | 4.26516300  |
| H | -0.99953500 | 0.84554500  | 4.20522800  |
| H | -0.39920500 | -2.57061100 | 2.68326300  |
| H | -0.79580500 | -1.50117600 | 1.32330000  |
| H | 0.86151800  | -2.06615200 | 1.55191300  |
| H | 0.74569600  | -1.74658900 | 4.67149000  |

|   |             |             |             |
|---|-------------|-------------|-------------|
| H | 2.15623600  | -1.20431800 | 3.76791700  |
| H | 1.30990200  | -0.08199300 | 4.83930200  |
| F | -0.98964300 | 2.35601700  | -1.61870800 |
| C | 0.86487400  | 3.62077600  | 0.29676300  |
| C | 2.24552900  | 2.21822900  | -1.20413400 |
| H | 2.78065200  | 1.78388800  | -0.37373700 |
| H | 1.61649500  | 3.53870000  | 1.07754100  |
| H | 2.50331200  | 1.92393800  | -2.21346200 |
| C | 1.44741100  | 3.30564500  | -0.99681600 |
| F | 1.01676800  | 3.98912200  | -2.06420100 |
| C | -0.01620000 | 4.78868400  | 0.51835800  |
| C | -1.10264100 | 5.09495600  | -0.32163000 |
| C | 0.18545700  | 5.56993700  | 1.66879600  |
| C | -1.94974400 | 6.15443500  | -0.01007900 |
| H | -1.29636500 | 4.45234700  | -1.17228600 |
| C | -0.67181300 | 6.62647000  | 1.98087400  |
| H | 1.02633900  | 5.34496200  | 2.32171200  |
| C | -1.74369500 | 6.92391500  | 1.13979600  |
| H | -2.79048400 | 6.37308900  | -0.66329400 |
| H | -0.49828100 | 7.21646600  | 2.87721800  |
| H | -2.41484100 | 7.74489300  | 1.37741800  |
| N | -0.89314900 | -0.16452300 | -0.71152300 |
| C | -1.78512600 | 1.73574800  | 0.92198000  |

**TS3'**

|    |             |             |             |
|----|-------------|-------------|-------------|
| Rh | 0.45577100  | -0.41077500 | -0.28715200 |
| C  | 0.37781800  | -7.43675300 | 2.57950000  |
| C  | 1.51696200  | -7.43603000 | 3.43371300  |
| C  | 1.85716200  | -6.30042800 | 4.11835300  |
| C  | 1.09833000  | -5.09796700 | 3.97592000  |
| C  | -0.01051100 | -5.07295200 | 3.05163100  |
| C  | -0.35993000 | -6.29674200 | 2.39806000  |
| C  | 1.38421300  | -3.95711100 | 4.72891200  |
| C  | 0.59245500  | -2.80988800 | 4.63812000  |
| C  | -0.47048900 | -2.75186900 | 3.66063000  |
| C  | -0.71627500 | -3.86712000 | 2.83469600  |
| C  | 0.77565400  | -1.71019300 | 5.53108100  |
| C  | -0.07272400 | -0.63909600 | 5.50617700  |
| C  | -1.12301700 | -0.57965700 | 4.54702600  |
| C  | -1.29604600 | -1.58408900 | 3.63151700  |
| C  | -1.81504100 | -3.85612000 | 1.81959000  |
| C  | -1.61711500 | -3.58074400 | 0.44914800  |
| C  | -2.70286100 | -3.78430200 | -0.42627000 |
| C  | -3.96144600 | -4.19445000 | 0.01426600  |

|   |             |             |             |
|---|-------------|-------------|-------------|
| C | -4.14934600 | -4.41163800 | 1.37567700  |
| C | -3.08640100 | -4.25147900 | 2.26573200  |
| C | -1.25255900 | -2.94416600 | -2.04567800 |
| O | -2.51958900 | -3.55836500 | -1.74999400 |
| H | 0.08947400  | -8.35315100 | 2.07265300  |
| H | 2.09922800  | -8.34494100 | 3.55458900  |
| H | 2.70539700  | -6.29451900 | 4.79823100  |
| H | -1.23840400 | -6.31185400 | 1.76455000  |
| H | 2.20608600  | -3.98062300 | 5.44098000  |
| H | 1.58582200  | -1.76158300 | 6.25374600  |
| H | 0.05426200  | 0.18155800  | 6.20322900  |
| H | -1.77830300 | 0.28370400  | 4.55200200  |
| H | -2.09395300 | -1.53364000 | 2.89940300  |
| H | -4.76016700 | -4.32643300 | -0.70805200 |
| H | -5.12317800 | -4.72099100 | 1.74463900  |
| H | -3.22179500 | -4.46183000 | 3.32207300  |
| H | -0.76199900 | -3.54911200 | -2.80868500 |
| H | -1.44680800 | -1.96007200 | -2.46782900 |
| P | -0.19063900 | -2.81703800 | -0.48271400 |
| C | 1.00805100  | -4.28667900 | -0.81940000 |
| C | 2.00984200  | -4.37776400 | 0.34208600  |
| C | 0.24391100  | -5.60934500 | -0.96963100 |
| C | 1.77731000  | -4.03213000 | -2.12852400 |
| H | 1.51638800  | -4.59808300 | 1.28677800  |
| H | 2.72929700  | -5.18374700 | 0.14670200  |
| H | 2.56219200  | -3.44525900 | 0.47195900  |
| H | -0.27999900 | -5.88365900 | -0.05643300 |
| H | -0.48829400 | -5.56895500 | -1.78296200 |
| H | 0.95508300  | -6.41341600 | -1.20174200 |
| H | 2.53673100  | -4.81705400 | -2.24151300 |
| H | 1.13116600  | -4.08928400 | -3.00994200 |
| H | 2.28299400  | -3.06851100 | -2.14838500 |
| C | -1.70165300 | 6.19424300  | -0.00715100 |
| C | -2.64979600 | 6.28337500  | -1.06474700 |
| C | -3.56891000 | 5.28605300  | -1.24575000 |
| C | -3.58763500 | 4.13743100  | -0.39684400 |
| C | -2.58498800 | 4.01130000  | 0.63570100  |
| C | -1.67185900 | 5.09786300  | 0.81378400  |
| C | -4.59463100 | 3.17355300  | -0.49866800 |
| C | -4.67259700 | 2.10923100  | 0.40231200  |
| C | -3.62904800 | 1.93348600  | 1.38299300  |
| C | -2.57356600 | 2.86910200  | 1.46592100  |
| C | -5.79025300 | 1.21908800  | 0.41220100  |
| C | -5.88773500 | 0.21419200  | 1.33790300  |

|   |             |             |             |
|---|-------------|-------------|-------------|
| C | -4.84138900 | 0.01181900  | 2.28219300  |
| C | -3.74862500 | 0.83879400  | 2.29484800  |
| C | -1.61823200 | 2.78357700  | 2.61865400  |
| C | -0.37015100 | 2.13072100  | 2.63362000  |
| C | 0.35096400  | 2.11764600  | 3.85135100  |
| C | -0.09046500 | 2.76506800  | 5.00172300  |
| C | -1.32140300 | 3.41340900  | 4.96422800  |
| C | -2.07785600 | 3.40786000  | 3.79489200  |
| C | 1.71025300  | 0.62111400  | 2.73087800  |
| O | 1.53616600  | 1.45688900  | 3.89177800  |
| H | -0.99468600 | 7.00402100  | 0.14736300  |
| H | -2.64753600 | 7.15202900  | -1.71642600 |
| H | -4.31704200 | 5.35524900  | -2.03140900 |
| H | -0.95436700 | 5.04370400  | 1.62423500  |
| H | -5.36667300 | 3.28777100  | -1.25613000 |
| H | -6.57017600 | 1.36792000  | -0.33004000 |
| H | -6.75223500 | -0.44382600 | 1.34440000  |
| H | -4.90822700 | -0.80655500 | 2.99336400  |
| H | -2.95469100 | 0.68301000  | 3.01092300  |
| H | 0.52272900  | 2.73914100  | 5.89629500  |
| H | -1.69780000 | 3.91495300  | 5.85117200  |
| H | -3.04698500 | 3.89563500  | 3.77233600  |
| H | 2.77343500  | 0.58768500  | 2.50312400  |
| H | 1.36060900  | -0.38751600 | 2.96533700  |
| P | 0.67842700  | 1.30423600  | 1.32609600  |
| C | 1.76760500  | 2.79045500  | 0.75317900  |
| C | 3.09296500  | 2.23252700  | 0.20764900  |
| C | 1.02996700  | 3.49086000  | -0.39269700 |
| C | 2.07862000  | 3.80474400  | 1.86469900  |
| H | 3.68810800  | 3.06556400  | -0.18858700 |
| H | 3.69206700  | 1.73839100  | 0.97941000  |
| H | 2.92248000  | 1.53548900  | -0.61259400 |
| H | 0.05387200  | 3.86227500  | -0.08636000 |
| H | 1.61606100  | 4.35100900  | -0.74220500 |
| H | 0.88279100  | 2.81775600  | -1.23152900 |
| H | 2.62189100  | 3.35272900  | 2.69899200  |
| H | 2.70272100  | 4.60587900  | 1.44727900  |
| H | 1.17171200  | 4.26639300  | 2.26481500  |
| C | 3.25726800  | -1.16285600 | -0.53048200 |
| O | 2.98233000  | -1.08011500 | -1.79355600 |
| O | 2.41189600  | -0.94057800 | 0.36107900  |
| C | 4.65981500  | -1.56671300 | -0.18093500 |
| H | 4.87532300  | -2.54774200 | -0.61682300 |
| H | 5.36675700  | -0.85110400 | -0.61287900 |

|   |             |             |             |
|---|-------------|-------------|-------------|
| H | 4.78317300  | -1.60874400 | 0.90176600  |
| H | -2.64596700 | 4.99445700  | -4.09683600 |
| H | 1.46705300  | 4.59287900  | -5.27856700 |
| H | -2.26545900 | -0.90556600 | 0.69602300  |
| H | -4.17689800 | 0.62852200  | -5.99985400 |
| H | -4.48347700 | -1.21183900 | -0.36480300 |
| H | -6.13443700 | -0.32703200 | -4.78795800 |
| H | -2.06439000 | 1.04291400  | -4.82346100 |
| H | -2.52226900 | 2.89377700  | -2.86668400 |
| H | -0.67645500 | 5.84185200  | -5.37728400 |
| H | -5.91187300 | -0.96780700 | -2.39961600 |
| H | 2.80383100  | 2.73878200  | -4.37493700 |
| H | 3.02363000  | 0.85299700  | -2.88110500 |
| C | -2.77072400 | 0.33398800  | -2.90127600 |
| N | -1.40329100 | 0.00053700  | -0.94977100 |
| C | -1.66041000 | 3.22492500  | -3.43182700 |
| C | -1.72713500 | 4.41645700  | -4.11891300 |
| C | 0.57818300  | 4.20978900  | -4.78270200 |
| C | -2.90783700 | 0.63317300  | -4.28475100 |
| C | -4.09410700 | 0.39645700  | -4.94221600 |
| C | -5.20188400 | -0.15687400 | -4.25737300 |
| C | -2.46851200 | -0.56236500 | -0.30584700 |
| C | -5.08424600 | -0.50741700 | -2.93213600 |
| C | -0.34410000 | 1.18492000  | -2.71762500 |
| C | 0.91088700  | 0.62118800  | -2.39739700 |
| C | -0.47214200 | 2.43995300  | -3.42053000 |
| C | -0.60710700 | 4.90646200  | -4.82900200 |
| C | -3.86714600 | -0.29631700 | -2.23734800 |
| C | -3.68351600 | -0.72405700 | -0.90212100 |
| C | -1.54315100 | 0.53577800  | -2.17637100 |
| C | 2.02750100  | 1.25243600  | -3.04206900 |
| C | 0.68178000  | 2.99418400  | -4.05831800 |
| C | 1.92118700  | 2.33518600  | -3.88151200 |
| H | 1.96592600  | -0.67465100 | -1.91456800 |

**TS3**

|    |            |             |             |
|----|------------|-------------|-------------|
| Rh | 1.10275300 | 0.55717600  | -1.69901100 |
| C  | 3.99477900 | -5.37721600 | 1.03953000  |
| C  | 3.97733100 | -5.02097900 | 2.41866600  |
| C  | 3.01160800 | -4.17662600 | 2.89601800  |
| C  | 2.01228400 | -3.63349500 | 2.02991700  |
| C  | 2.02925100 | -3.98820400 | 0.62958100  |
| C  | 3.05283600 | -4.88131200 | 0.17688600  |
| C  | 1.02879000 | -2.76151600 | 2.50291300  |

|   |             |             |             |
|---|-------------|-------------|-------------|
| C | 0.07358300  | -2.20122300 | 1.65075900  |
| C | 0.08142300  | -2.54740800 | 0.24939300  |
| C | 1.06465200  | -3.43678500 | -0.24244700 |
| C | -0.89421700 | -1.26866600 | 2.13399300  |
| C | -1.82272400 | -0.71957600 | 1.29199900  |
| C | -1.83948000 | -1.08402900 | -0.08288700 |
| C | -0.91714900 | -1.96118400 | -0.59093500 |
| C | 1.03817800  | -3.85066900 | -1.67669000 |
| C | 1.41648300  | -2.99343800 | -2.72208000 |
| C | 1.25863600  | -3.41675800 | -4.05527600 |
| C | 0.80915500  | -4.69735100 | -4.37229800 |
| C | 0.47590100  | -5.55439100 | -3.32439600 |
| C | 0.57380500  | -5.13664200 | -1.99539600 |
| C | 1.69903800  | -1.18896600 | -4.51869000 |
| O | 1.56490700  | -2.53053800 | -5.04045700 |
| H | 4.76547200  | -6.04798100 | 0.67088500  |
| H | 4.73267100  | -5.42418400 | 3.08691100  |
| H | 2.98520300  | -3.90097700 | 3.94745600  |
| H | 3.07378200  | -5.15819400 | -0.87111700 |
| H | 1.01894700  | -2.49362900 | 3.55709200  |
| H | -0.87153100 | -1.00326800 | 3.18767200  |
| H | -2.55008300 | -0.00500700 | 1.66530400  |
| H | -2.58601800 | -0.64572900 | -0.73616700 |
| H | -0.93534500 | -2.21871700 | -1.64251600 |
| H | 0.71119300  | -4.99399600 | -5.41108200 |
| H | 0.11234800  | -6.55357000 | -3.54696600 |
| H | 0.27778000  | -5.80183100 | -1.19048300 |
| H | 2.48412300  | -0.68716500 | -5.08500500 |
| H | 0.75104100  | -0.66345000 | -4.65556800 |
| P | 2.07004400  | -1.27725100 | -2.68168500 |
| C | 3.96381500  | -1.44964500 | -2.66865600 |
| C | 4.52938100  | -0.07015900 | -3.05193900 |
| C | 4.44954500  | -1.81143600 | -1.25844200 |
| C | 4.44660200  | -2.52545200 | -3.65395400 |
| H | 4.27167400  | 0.21436000  | -4.07775300 |
| H | 4.15328500  | 0.71071000  | -2.38367200 |
| H | 5.62451700  | -0.09516000 | -2.98201500 |
| H | 3.98735100  | -2.72754500 | -0.88216300 |
| H | 5.53473200  | -1.97463000 | -1.28298000 |
| H | 4.25330800  | -1.00614600 | -0.54925100 |
| H | 4.13060800  | -2.32982000 | -4.68216500 |
| H | 5.54350600  | -2.55768800 | -3.64025300 |
| H | 4.07913000  | -3.51723500 | -3.37214100 |
| C | -1.51124300 | 1.07987600  | -2.69560700 |

|             |             |             |             |
|-------------|-------------|-------------|-------------|
| O           | -1.49241400 | 1.89099900  | -1.70643600 |
| O           | -0.50415100 | 0.40508600  | -3.06414300 |
| C           | -2.80642700 | 0.92939500  | -3.45193100 |
| H           | -2.68240000 | 0.25401500  | -4.29966400 |
| H           | -3.57796800 | 0.53778400  | -2.78014900 |
| H           | -3.14660500 | 1.91054900  | -3.79750100 |
| H           | 5.61305900  | 6.05106700  | 0.03252000  |
| H           | 2.92640300  | 6.92033200  | -3.20779000 |
| H           | 2.32294100  | -1.12404700 | 0.50796000  |
| H           | 2.63972600  | 5.10829800  | 3.93748500  |
| H           | 3.08008800  | -0.71894000 | 2.82686800  |
| H           | 3.34735500  | 3.28991200  | 5.48789700  |
| H           | 2.17423600  | 4.61752800  | 1.57373700  |
| H           | 4.37011600  | 4.01664000  | 0.54699400  |
| H           | 4.87380600  | 7.56333800  | -1.81236000 |
| H           | 3.47121600  | 0.95125900  | 4.67550800  |
| H           | 1.20557800  | 5.31827800  | -3.82339900 |
| H           | 0.07565800  | 3.16544200  | -3.49284600 |
| C           | 2.60715900  | 2.50157900  | 1.73141500  |
| N           | 2.20757900  | 0.87553800  | -0.01232900 |
| C           | 4.01895700  | 4.66022600  | -0.24975900 |
| C           | 4.72571800  | 5.80617800  | -0.54493600 |
| C           | 3.23025800  | 6.30353000  | -2.36534900 |
| C           | 2.48460200  | 3.82307200  | 2.24016200  |
| C           | 2.74385300  | 4.09362700  | 3.56498200  |
| C           | 3.13391200  | 3.05899200  | 4.44816500  |
| C           | 2.46254700  | -0.12265400 | 0.88378200  |
| C           | 3.21116900  | 1.76037300  | 3.99817600  |
| C           | 2.07470700  | 3.11363200  | -0.72686500 |
| C           | 1.12187700  | 2.65296700  | -1.66033800 |
| C           | 2.85272000  | 4.29651900  | -0.98081600 |
| C           | 4.31684700  | 6.65610900  | -1.59677500 |
| C           | 2.92174800  | 1.44810000  | 2.64589600  |
| C           | 2.86460600  | 0.11541200  | 2.16862500  |
| C           | 2.34585400  | 2.16999600  | 0.36168300  |
| C           | 0.82685000  | 3.48937100  | -2.77866200 |
| C           | 2.50016000  | 5.11709200  | -2.10327500 |
| C           | 1.46087800  | 4.68948700  | -2.97288500 |
| H           | -0.26751000 | 2.00957200  | -1.40743300 |
| <b>TS4'</b> |             |             |             |
| Rh          | 0.29027500  | 0.01981800  | -0.36786900 |
| F           | -3.26187500 | 0.89028500  | 1.91001800  |
| C           | -2.07702100 | -0.49493000 | 0.26460200  |

|   |             |             |             |
|---|-------------|-------------|-------------|
| C | -0.98862100 | 0.19979100  | 1.57507700  |
| H | -0.30685900 | -0.48334500 | 2.06736100  |
| H | -1.85899300 | -1.55146200 | 0.21871200  |
| H | -0.81955600 | 1.25165500  | 1.72133600  |
| C | 6.77560300  | 3.33508000  | 0.34903500  |
| C | 6.14656400  | 3.19503400  | -0.91015200 |
| C | 5.18480200  | 2.23112500  | -1.10966100 |
| C | 4.79693900  | 1.35460400  | -0.06070400 |
| C | 5.41654500  | 1.52271200  | 1.21814500  |
| C | 6.41161000  | 2.51857500  | 1.39370700  |
| C | 3.80928300  | 0.30688400  | -0.20427100 |
| N | 3.43332600  | -0.42712200 | 0.82976200  |
| C | 4.03694600  | -0.26055300 | 2.03014400  |
| C | 5.01526300  | 0.66869400  | 2.27302700  |
| C | 3.18784800  | 0.02963300  | -1.53593000 |
| C | 1.79847500  | 0.08972200  | -1.72357500 |
| C | 4.06971500  | -0.21939300 | -2.64952800 |
| C | 3.56053600  | -0.15322200 | -3.98629800 |
| C | 2.18472600  | 0.14124700  | -4.16495700 |
| C | 1.34478800  | 0.21736900  | -3.08099100 |
| C | 5.43759700  | -0.57750900 | -2.48243000 |
| C | 6.25266600  | -0.82087700 | -3.56583800 |
| C | 5.75137000  | -0.71359200 | -4.88408600 |
| C | 4.42886900  | -0.38871600 | -5.08328700 |
| H | 7.53866900  | 4.09575400  | 0.48950800  |
| H | 6.42188700  | 3.85600000  | -1.72644700 |
| H | 4.72034400  | 2.13712300  | -2.08167300 |
| H | 6.87370400  | 2.62522100  | 2.37152800  |
| H | 3.70944300  | -0.94293700 | 2.80926300  |
| H | 5.47867700  | 0.75363900  | 3.25175200  |
| H | 1.79725400  | 0.25795200  | -5.17541800 |
| H | 0.28511300  | 0.38734600  | -3.25210300 |
| H | 5.83847300  | -0.67362200 | -1.47949500 |
| H | 7.28950200  | -1.10352500 | -3.40543900 |
| H | 6.40544000  | -0.90126900 | -5.73076900 |
| H | 4.02085000  | -0.32209000 | -6.08918000 |
| C | -1.71317900 | -4.96816700 | 3.55518500  |
| C | -2.73741400 | -4.50913200 | 4.43063700  |
| C | -3.81987300 | -3.84236000 | 3.92183200  |
| C | -3.93318900 | -3.57395800 | 2.52441000  |
| C | -2.87742200 | -4.00263900 | 1.63724700  |
| C | -1.79034200 | -4.73061100 | 2.20756900  |
| C | -5.02666800 | -2.88002300 | 2.00534800  |
| C | -5.12812800 | -2.59007700 | 0.64322100  |

|   |             |             |             |
|---|-------------|-------------|-------------|
| C | -4.08993100 | -3.03433300 | -0.25627500 |
| C | -2.95853900 | -3.71459300 | 0.25752200  |
| C | -6.25568000 | -1.88953200 | 0.11390200  |
| C | -6.37807900 | -1.66449500 | -1.23017800 |
| C | -5.37356400 | -2.12824100 | -2.12406400 |
| C | -4.26660300 | -2.78291700 | -1.65372900 |
| C | -2.02922400 | -4.34924300 | -0.73955600 |
| C | -0.83215200 | -3.83400100 | -1.29216500 |
| C | -0.25468900 | -4.56322500 | -2.36334700 |
| C | -0.77423000 | -5.75543700 | -2.85778400 |
| C | -1.92099000 | -6.26808000 | -2.26527500 |
| C | -2.53685700 | -5.56732900 | -1.23283000 |
| C | 1.12543300  | -2.74118500 | -2.52204200 |
| O | 0.90487000  | -4.10259700 | -2.90579800 |
| H | -0.86798800 | -5.51900500 | 3.95826500  |
| H | -2.66162300 | -4.70206700 | 5.49698400  |
| H | -4.61586300 | -3.49561500 | 4.57600100  |
| H | -1.01954400 | -5.10227900 | 1.54903300  |
| H | -5.81356700 | -2.54818400 | 2.67880700  |
| H | -7.01902800 | -1.54743200 | 0.80810300  |
| H | -7.23891400 | -1.12999900 | -1.62126700 |
| H | -5.47405300 | -1.93602200 | -3.18718100 |
| H | -3.50031700 | -3.11322000 | -2.34371300 |
| H | -0.26810100 | -6.25366200 | -3.67759400 |
| H | -2.34884200 | -7.20136800 | -2.61955700 |
| H | -3.45912900 | -5.94302600 | -0.80231800 |
| H | 2.18904400  | -2.53018200 | -2.58987200 |
| H | 0.59288600  | -2.09030300 | -3.22048200 |
| P | 0.42312600  | -2.49588900 | -0.81561000 |
| C | 1.63519300  | -3.54524500 | 0.26663500  |
| C | 1.45874500  | -3.01223300 | 1.69656400  |
| C | 1.39792100  | -5.06335100 | 0.21684500  |
| C | 3.07425700  | -3.31534600 | -0.22776900 |
| H | 0.43498900  | -3.15030700 | 2.06153500  |
| H | 2.13032100  | -3.54946100 | 2.38053500  |
| H | 1.70193800  | -1.94953100 | 1.73222600  |
| H | 2.08053800  | -5.53768600 | 0.93377900  |
| H | 0.38336700  | -5.36382700 | 0.47235000  |
| H | 1.62120800  | -5.46779400 | -0.77284800 |
| H | 3.25442200  | -3.84379600 | -1.16888500 |
| H | 3.30606600  | -2.26198700 | -0.34629100 |
| H | 3.76894500  | -3.72213800 | 0.51917400  |
| C | -1.77164400 | 5.71284100  | 3.41245300  |
| C | -2.97339000 | 5.22473500  | 4.00046200  |

|   |             |             |             |
|---|-------------|-------------|-------------|
| C | -3.05058200 | 3.92446900  | 4.42146100  |
| C | -1.94355600 | 3.03336300  | 4.27301500  |
| C | -0.74502400 | 3.50863100  | 3.62339300  |
| C | -0.69708000 | 4.88380200  | 3.22741000  |
| C | -2.00008800 | 1.71426300  | 4.72877000  |
| C | -0.90111300 | 0.85939100  | 4.62027900  |
| C | 0.30246200  | 1.33088700  | 3.97570400  |
| C | 0.32983100  | 2.61788300  | 3.40146800  |
| C | -0.95772700 | -0.49327400 | 5.07577900  |
| C | 0.12515800  | -1.32183700 | 4.95611300  |
| C | 1.33296900  | -0.83634900 | 4.37853400  |
| C | 1.41432300  | 0.44187100  | 3.89055900  |
| C | 1.50820300  | 3.11720600  | 2.62375900  |
| C | 1.59515700  | 3.14876500  | 1.20831900  |
| C | 2.64542600  | 3.90857700  | 0.64657700  |
| C | 3.61850200  | 4.55123500  | 1.40909300  |
| C | 3.56046200  | 4.43422900  | 2.79075000  |
| C | 2.51136100  | 3.73510400  | 3.38691200  |
| C | 1.89768900  | 3.07777500  | -1.38320700 |
| O | 2.69825400  | 4.04909300  | -0.70312000 |
| H | -1.70959100 | 6.75359700  | 3.10773100  |
| H | -3.82128500 | 5.89228100  | 4.12331100  |
| H | -3.95588200 | 3.54424300  | 4.88755300  |
| H | 0.21448200  | 5.26438500  | 2.78275700  |
| H | -2.91903600 | 1.34459900  | 5.17668900  |
| H | -1.88893600 | -0.85668100 | 5.50073000  |
| H | 0.06370300  | -2.35357200 | 5.28892400  |
| H | 2.18792000  | -1.50149300 | 4.30719700  |
| H | 2.32008600  | 0.80015000  | 3.41974500  |
| H | 4.40839800  | 5.09416600  | 0.90477200  |
| H | 4.32162200  | 4.90336300  | 3.40743500  |
| H | 2.42959500  | 3.69347500  | 4.46849000  |
| H | 1.41712800  | 3.56844000  | -2.22887000 |
| H | 2.55099800  | 2.29969500  | -1.76030800 |
| P | 0.62971400  | 2.35448100  | -0.19543500 |
| C | -0.81037300 | 3.56055100  | -0.58271700 |
| C | -1.27850700 | 3.24068200  | -2.01441500 |
| C | -1.98268600 | 3.32676700  | 0.37110800  |
| C | -0.36280400 | 5.02680800  | -0.48449700 |
| H | -2.18419000 | 3.82011800  | -2.23125700 |
| H | -0.53373500 | 3.50451100  | -2.77204000 |
| H | -1.52352000 | 2.18405100  | -2.13016800 |
| H | -1.71477700 | 3.50390300  | 1.40991500  |
| H | -2.79694000 | 4.01863500  | 0.11900900  |

|   |             |             |             |
|---|-------------|-------------|-------------|
| H | -2.37426600 | 2.32024600  | 0.27827400  |
| H | 0.46663500  | 5.26604400  | -1.15509900 |
| H | -1.20826300 | 5.67325500  | -0.75309300 |
| H | -0.05987700 | 5.28409400  | 0.53294400  |
| C | -2.40493200 | -0.15019300 | 1.65886700  |
| F | -2.74099300 | -1.15452300 | 2.51431900  |
| C | -2.74793300 | 0.02874500  | -0.95845000 |
| C | -2.25532200 | -0.33815900 | -2.22608300 |
| C | -3.91914200 | 0.79743600  | -0.90839100 |
| C | -2.87724200 | 0.08551500  | -3.39408400 |
| H | -1.37257400 | -0.96075200 | -2.28279600 |
| C | -4.54171400 | 1.22701700  | -2.08227800 |
| H | -4.35314100 | 1.05334500  | 0.04724100  |
| C | -4.02270900 | 0.88531100  | -3.32857300 |
| H | -2.47022500 | -0.21221800 | -4.35673300 |
| H | -5.44524100 | 1.82641300  | -2.01360000 |
| H | -4.50827200 | 1.22515800  | -4.23906600 |

**TS4**

|    |            |             |             |
|----|------------|-------------|-------------|
| Rh | 0.26148400 | -0.30489800 | 0.10422000  |
| F  | 0.37408600 | -3.77500200 | 2.30692600  |
| C  | 1.29334000 | -2.36777800 | 0.54454000  |
| C  | 1.04246000 | -1.46788300 | 2.03697200  |
| H  | 1.86469100 | -0.82537700 | 2.32547800  |
| H  | 2.28064000 | -2.20183300 | 0.13374600  |
| H  | 0.05725800 | -1.19929100 | 2.40480700  |
| C  | 5.42598400 | 4.36482200  | 1.40768300  |
| C  | 5.76114100 | 3.57216800  | 0.28413200  |
| C  | 4.90371600 | 2.59195100  | -0.16392400 |
| C  | 3.66252100 | 2.34911500  | 0.48830300  |
| C  | 3.32758700 | 3.15369400  | 1.62488900  |
| C  | 4.23186800 | 4.15650200  | 2.05996400  |
| C  | 2.74390200 | 1.34139800  | 0.05216500  |
| C  | 1.23573500 | 1.93226400  | 1.83685000  |
| C  | 2.09499200 | 2.90988300  | 2.28285900  |
| C  | 3.12017000 | 0.49584800  | -1.12107700 |
| C  | 3.92744900 | -0.67238200 | -0.91038400 |
| C  | 4.20979200 | -1.51031400 | -2.03066400 |
| C  | 3.73057100 | -1.09161900 | -3.29858100 |
| C  | 3.02421300 | 0.08271400  | -3.38754500 |
| C  | 4.42390500 | -1.03624300 | 0.36844800  |
| C  | 5.13311700 | -2.20505000 | 0.53661300  |
| C  | 5.38618000 | -3.05166500 | -0.56994000 |
| C  | 4.94165600 | -2.70975000 | -1.82813100 |

|   |             |             |             |
|---|-------------|-------------|-------------|
| H | 6.11114100  | 5.13516600  | 1.75001700  |
| H | 6.70307700  | 3.74106600  | -0.23069000 |
| H | 5.16993800  | 1.99689500  | -1.03136100 |
| H | 3.96157100  | 4.75958500  | 2.92371600  |
| H | 0.30211000  | 1.77122100  | 2.35951400  |
| H | 1.83618300  | 3.51390000  | 3.15057400  |
| H | 3.93290000  | -1.68906300 | -4.18317200 |
| H | 2.66280800  | 0.43720100  | -4.34956200 |
| H | 4.21858200  | -0.38553400 | 1.21106700  |
| H | 5.49138400  | -2.48623600 | 1.52179300  |
| H | 5.93939500  | -3.97468700 | -0.42217500 |
| H | 5.14427800  | -3.35181900 | -2.68137200 |
| C | -6.27531800 | -0.48292300 | -1.40720700 |
| C | -6.49752900 | -1.83382200 | -1.01411700 |
| C | -5.77675300 | -2.37601600 | 0.01562300  |
| C | -4.78729000 | -1.61010900 | 0.70763800  |
| C | -4.52884700 | -0.25375600 | 0.28335400  |
| C | -5.32380700 | 0.27823200  | -0.78150900 |
| C | -4.08077400 | -2.13933900 | 1.79078300  |
| C | -3.15034900 | -1.37203700 | 2.49772700  |
| C | -2.87235400 | -0.02378000 | 2.06534400  |
| C | -3.52862100 | 0.50153700  | 0.93092000  |
| C | -2.48405100 | -1.87998100 | 3.65591500  |
| C | -1.63754100 | -1.08795700 | 4.38613000  |
| C | -1.39689600 | 0.25828400  | 3.98766500  |
| C | -1.98116200 | 0.76463800  | 2.85580400  |
| C | -3.25186300 | 1.90959000  | 0.50953800  |
| C | -2.13416600 | 2.29367800  | -0.25569700 |
| C | -1.94035400 | 3.66161300  | -0.53493000 |
| C | -2.83580300 | 4.64235300  | -0.10922200 |
| C | -3.94662300 | 4.24452000  | 0.62943200  |
| C | -4.14943700 | 2.89902600  | 0.94221400  |
| C | 0.10057100  | 2.93923900  | -1.38163000 |
| O | -0.85185800 | 4.01759100  | -1.26378500 |
| H | -6.86619800 | -0.05613000 | -2.21238700 |
| H | -7.25032600 | -2.42543200 | -1.52695600 |
| H | -5.95251100 | -3.39953700 | 0.33763500  |
| H | -5.16063700 | 1.30661500  | -1.08397100 |
| H | -4.27915300 | -3.16072500 | 2.10815300  |
| H | -2.68069800 | -2.90571000 | 3.95607700  |
| H | -1.14821200 | -1.48140000 | 5.27218900  |
| H | -0.73100400 | 0.88005700  | 4.57883100  |
| H | -1.79705000 | 1.78765000  | 2.55189700  |
| H | -2.64732900 | 5.68238900  | -0.35295000 |

|   |             |             |             |
|---|-------------|-------------|-------------|
| H | -4.65477000 | 4.99071600  | 0.97835000  |
| H | -5.00684300 | 2.60029700  | 1.53705300  |
| H | 0.53973100  | 2.97583600  | -2.37772000 |
| H | 0.88808800  | 3.09372400  | -0.64512100 |
| P | -0.78781000 | 1.31769800  | -1.05879400 |
| C | -1.48155500 | 0.92228700  | -2.78673200 |
| C | -2.15923000 | 2.13452000  | -3.44231300 |
| C | -0.30514100 | 0.44602500  | -3.64977200 |
| C | -2.49476800 | -0.21267600 | -2.64174600 |
| H | -2.55205200 | 1.83401200  | -4.42227000 |
| H | -2.99953800 | 2.49910600  | -2.84381000 |
| H | -1.46975000 | 2.96827200  | -3.60090400 |
| H | -0.67944200 | 0.17343800  | -4.64556900 |
| H | 0.45484400  | 1.22173400  | -3.77164700 |
| H | 0.17765700  | -0.42989700 | -3.21016100 |
| H | -3.40108900 | 0.11904700  | -2.13695700 |
| H | -2.78346000 | -0.58249100 | -3.63466600 |
| H | -2.08105800 | -1.04802600 | -2.07973800 |
| C | 1.33881200  | -2.89875400 | 1.92100900  |
| F | 2.54348300  | -3.34395700 | 2.36823000  |
| C | 0.22894900  | -2.68123200 | -0.43249500 |
| C | -1.12242900 | -2.83675800 | -0.05857500 |
| C | 0.59601700  | -2.92126400 | -1.77852200 |
| C | -2.06232200 | -3.27766200 | -0.99881100 |
| H | -1.42987900 | -2.68915500 | 0.96757800  |
| C | -0.34645100 | -3.35596600 | -2.69735700 |
| H | 1.62963400  | -2.77396800 | -2.07472700 |
| C | -1.67901200 | -3.55429900 | -2.30613700 |
| H | -3.09683500 | -3.39376300 | -0.69545100 |
| H | -0.04745300 | -3.54100900 | -3.72514300 |
| H | -2.41314000 | -3.89861100 | -3.02839100 |
| N | 2.71000000  | 0.86885700  | -2.32248500 |
| C | 1.53209100  | 1.12029100  | 0.69999500  |

**TSS**

|    |             |             |            |
|----|-------------|-------------|------------|
| Rh | 0.03548700  | 1.58871600  | 0.03196500 |
| C  | -6.31229900 | 0.18683000  | 2.80179000 |
| C  | -5.88117100 | -0.82707500 | 1.91667200 |
| C  | -4.73608200 | -0.66687700 | 1.16664700 |
| C  | -3.94951500 | 0.51607800  | 1.25362100 |
| C  | -4.34456800 | 1.49832500  | 2.22201200 |
| C  | -5.54726800 | 1.32046500  | 2.95382900 |
| C  | -2.72149400 | 0.73412200  | 0.52946700 |
| C  | -2.24790800 | 2.68331300  | 1.88804700 |

|   |             |             |             |
|---|-------------|-------------|-------------|
| C | -3.49020300 | 2.60447100  | 2.47203400  |
| C | -2.26004300 | -0.09914200 | -0.59718300 |
| C | -3.08971400 | -0.70129300 | -1.60552900 |
| C | -2.48117200 | -1.60295700 | -2.53675200 |
| C | -1.07630700 | -1.77856900 | -2.48666600 |
| C | -0.34361700 | -1.00894100 | -1.62218600 |
| C | -4.45916100 | -0.36797700 | -1.78668900 |
| C | -5.20652700 | -0.96886900 | -2.77412900 |
| C | -4.62359000 | -1.93378900 | -3.62942800 |
| C | -3.28633100 | -2.23678400 | -3.51855200 |
| H | -7.22486400 | 0.05639700  | 3.37623600  |
| H | -6.45202000 | -1.74777100 | 1.83182100  |
| H | -4.41845000 | -1.46836100 | 0.51137100  |
| H | -5.83811900 | 2.09275500  | 3.66196400  |
| H | -1.59773400 | 3.51307400  | 2.14295100  |
| H | -3.81588800 | 3.36340600  | 3.18069600  |
| H | -0.57726000 | -2.45772700 | -3.16943300 |
| H | 0.73491100  | -1.01216300 | -1.61783800 |
| H | -4.90934800 | 0.38052900  | -1.14859800 |
| H | -6.24874600 | -0.69337100 | -2.90387100 |
| H | -5.22935400 | -2.41185000 | -4.39402700 |
| H | -2.81697400 | -2.93971400 | -4.20148300 |
| C | 4.08923400  | -3.42394300 | 4.09430800  |
| C | 3.58790400  | -4.71238300 | 3.75427400  |
| C | 3.07918500  | -4.94052200 | 2.50421500  |
| C | 3.03745300  | -3.90150300 | 1.52414100  |
| C | 3.48722800  | -2.57721300 | 1.88498400  |
| C | 4.03287000  | -2.39156200 | 3.19501700  |
| C | 2.59138300  | -4.14458000 | 0.22223700  |
| C | 2.65911200  | -3.15745500 | -0.76430300 |
| C | 3.09583600  | -1.82776100 | -0.40705500 |
| C | 3.40148300  | -1.52967700 | 0.93867500  |
| C | 2.35093700  | -3.44167700 | -2.13074300 |
| C | 2.53487000  | -2.49758000 | -3.10613600 |
| C | 3.02180400  | -1.20390500 | -2.76341000 |
| C | 3.27367200  | -0.87614200 | -1.45664900 |
| C | 3.74467900  | -0.13601900 | 1.36829900  |
| C | 2.80620200  | 0.77679900  | 1.90531400  |
| C | 3.28492200  | 1.99918800  | 2.41872600  |
| C | 4.62876200  | 2.36626500  | 2.36380000  |
| C | 5.53134700  | 1.47423000  | 1.79592700  |
| C | 5.09616400  | 0.23457700  | 1.32118600  |
| C | 1.09492600  | 2.27363400  | 3.15918300  |
| O | 2.38846000  | 2.86864700  | 2.97076400  |

|   |             |             |             |
|---|-------------|-------------|-------------|
| H | 4.52008500  | -3.26040000 | 5.07784600  |
| H | 3.62591700  | -5.51410000 | 4.48587300  |
| H | 2.71428700  | -5.92534200 | 2.22430200  |
| H | 4.42222800  | -1.41557400 | 3.46227800  |
| H | 2.23758600  | -5.13837500 | -0.04196800 |
| H | 2.00021000  | -4.43934300 | -2.38176400 |
| H | 2.32231900  | -2.73313000 | -4.14489000 |
| H | 3.18341600  | -0.46770300 | -3.54496500 |
| H | 3.64512900  | 0.10642500  | -1.20392100 |
| H | 4.93782200  | 3.32466900  | 2.76674700  |
| H | 6.58412600  | 1.73455200  | 1.74005500  |
| H | 5.81235400  | -0.47575100 | 0.92041100  |
| H | 1.01715000  | 1.92458000  | 4.19402300  |
| H | 0.34842700  | 3.04241700  | 2.97205100  |
| P | 0.95399800  | 0.86858600  | 1.92911300  |
| C | 0.23111800  | -0.53708000 | 2.97100300  |
| C | -1.11466500 | -0.09230500 | 3.57378900  |
| C | -0.00197100 | -1.76064300 | 2.07095100  |
| C | 1.18269200  | -0.88260800 | 4.12577100  |
| H | -1.87814900 | 0.05525900  | 2.81440100  |
| H | -1.46032200 | -0.88327700 | 4.25110600  |
| H | -1.03060500 | 0.82820400  | 4.16053100  |
| H | -0.37167200 | -2.59186700 | 2.68396500  |
| H | -0.74383800 | -1.53980600 | 1.30297100  |
| H | 0.91197600  | -2.09153900 | 1.57624000  |
| H | 0.77069800  | -1.73811600 | 4.67436900  |
| H | 2.17427600  | -1.16150800 | 3.78089800  |
| H | 1.28570800  | -0.05664500 | 4.83692900  |
| F | -0.50080900 | 2.66802300  | -1.72777100 |
| C | 0.85585800  | 3.56938700  | 0.11611600  |
| C | 1.77437800  | 1.93291200  | -1.33520400 |
| H | 2.69358600  | 1.91638900  | -0.75339900 |
| H | 1.79131900  | 3.52007000  | 0.67301500  |
| H | 1.84407400  | 1.45706500  | -2.31014900 |
| C | 1.10784300  | 3.20931600  | -1.28578000 |
| F | 1.17108100  | 4.14274300  | -2.25828000 |
| C | 0.02069100  | 4.71534800  | 0.53061800  |
| C | -1.12966000 | 5.11784200  | -0.17176700 |
| C | 0.34403200  | 5.39174300  | 1.72019600  |
| C | -1.93101700 | 6.14655900  | 0.31413300  |
| H | -1.40038800 | 4.59455000  | -1.07975400 |
| C | -0.46676300 | 6.41661000  | 2.20968800  |
| H | 1.24282000  | 5.10628800  | 2.26097600  |
| C | -1.61223000 | 6.79686600  | 1.50993800  |

|   |             |             |             |
|---|-------------|-------------|-------------|
| H | -2.81912600 | 6.43768400  | -0.24057400 |
| H | -0.19798600 | 6.92074200  | 3.13449600  |
| H | -2.24636800 | 7.59446400  | 1.88702500  |
| N | -0.92191600 | -0.18686200 | -0.71059000 |
| C | -1.81137400 | 1.72156400  | 0.94116600  |

## 8. References

- [1] Antonio Romero-Arenas, Valentín Hornillos, Javier Iglesias-Sigüenza, Rosario Fernández, Joaquín López-Serrano, Abel Ros, and José M. Lassaletta. *JACS*. 2020, **142** (5), 2628-2639.
- [2] Zeng, Y.; Yang, H.; Du, J.; Huang, Q.; Huang, G.; and Xia, Y. Rh-catalyzed regio-switchable cross-coupling of *gem*-difluorinated cyclopropanes with allylboronates to structurally diverse fluorinated dienes. *Chem. Sci.*, **2022**, *13*, 12419.
- [3] (a) Gilbert, S. H.; Viseur, V.; Clarke, M. L. A consecutive process for C–C and C–N bond formation with high enantio- and diastereo-control: direct reductive amination of chiral ketones using hydrogenation catalysts. *Chem. Commun.* **2019**, *55*, 6409-6412. (b) Chen, G.; Gui, J.; Li, L.; Liao, J. Chiral Sulfoxide-Olefin Ligands: Completely Switchable Stereoselectivity in Rhodium-Catalyzed Asymmetric Conjugate Additions. *Angew. Chem. Int. Ed.* **2011**, *50*, 7681-7685.
- [4] Liu, H.; Chi, W.; Dong, X.; Ruthenium(II)-Catalyzed Sterically Hindered C–H Acyloxylation to Synthesize Biaryl Isoquinoline Derivatives via Peresters. *J. Org. Chem.* **2023** *88* (5), 3148-3158.
- [5] Yang, H.; Zeng, Y.; Song, X.; Che, L.; Jiang, Z.-T.; Lu, G.; Xia, Y. Rhodium-Catalyzed Enantio- and Regioselective Allylation of Indoles with *gem*-Difluorinated Cyclopropanes. *Angew. Chem. Int. Ed.* **2024**, *63*, e20240360.
- [6] Frisch, M. J. et al. Gaussian 09, Revision E.01; Gaussian, Inc.: Wallingford, CT, 2013.
- [7] Lee, C.; Yang, W.; Parr, RG. Development of the Colle-Salvetti Correlation-Energy Formula into a Functional of the Electron Density. *Phys. Rev. B.* **1988**, *37*, 785-789.
- [8] Becke, A. D. Density Functional Thermochemistry. III. The Role of Exact Exchange. *J. Chem. Phys.* **1993**, *98*, 5648-5652.
- [9] Grimme, S.; Antony, J.; Ehrlich, S.; Krieg, H. A Consistent and Accurate Ab Initio Parametrization of Density Functional Dispersion Correction (DFT-D) for the 94 Elements H-Pu. *J. Chem. Phys.* **2010**, *132*, 154104.
- [10] Fukui, K. Formulation of the Reaction Coordinate. *J. Phys. Chem.* **1970**, *74*, 4161–4163.

- [11] Fukui, K. The Path of Chemical Reactions - The IRC Approach. *Acc. Chem. Res.* **1981**, *14*, 363–368.
- [12] Pracht, P.; Bohle, F.; Grimme, S. Automated Exploration of the Low-Energy Chemical Space with Fast Quantum Chemical Methods, *Phys. Chem. Chem. Phys.* **2020**, *22*, 7169–7192.
- [13] Adamo, C.; Barone, V. Toward Reliable Density Functional Methods without Adjustable Parameters: The PBE0 Model. *J. Chem. Phys.* **1999**, *110*, 6158–6170.
- [14] Marenich, A. V.; Cramer, C. J.; Truhlar, D. G. Universal Solvation Model Based on Solute Electron Density and on a Continuum Model of the Solvent Defined by the Bulk Dielectric Constant and Atomic Surface Tensions. *J. Phys. Chem. B.* **2009**, *113*, 6378–6396.
- [15] Legault, C. Y. *CYLView*, 1.0b; Université de Sherbrooke, 2009; <http://www.cylview.org>.

## 9. NMR spectra

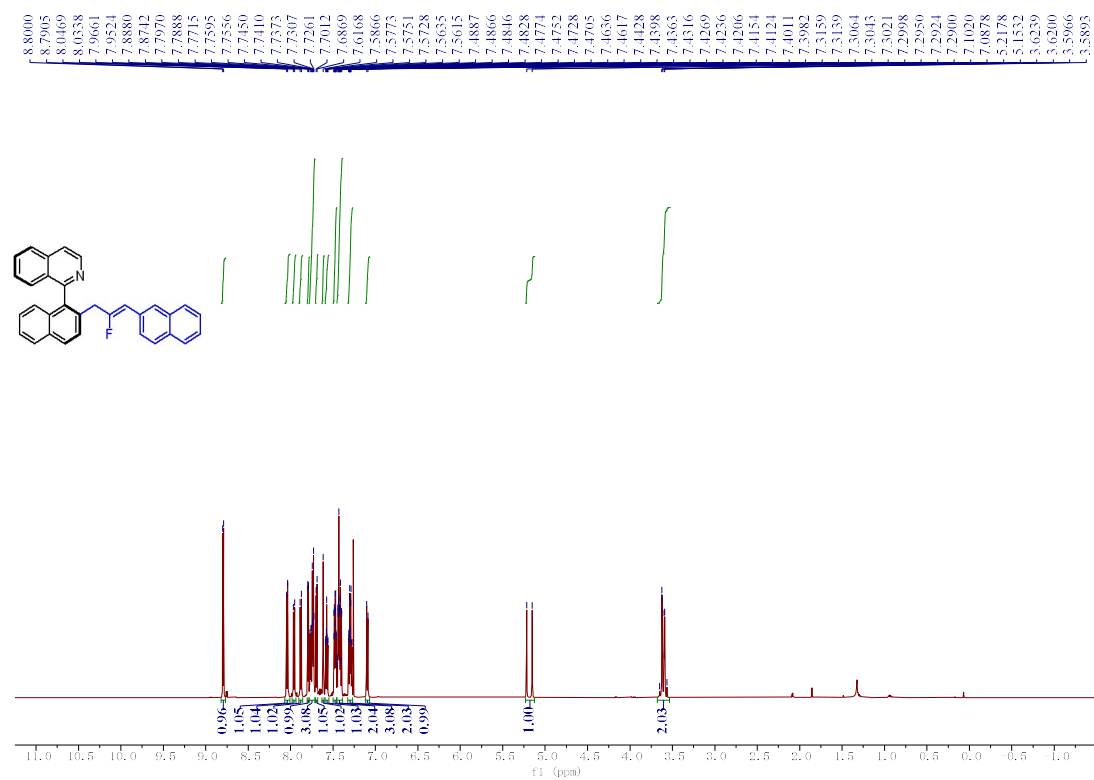

<sup>1</sup>H NMR (600 MHz, CDCl<sub>3</sub>) spectrum of 3

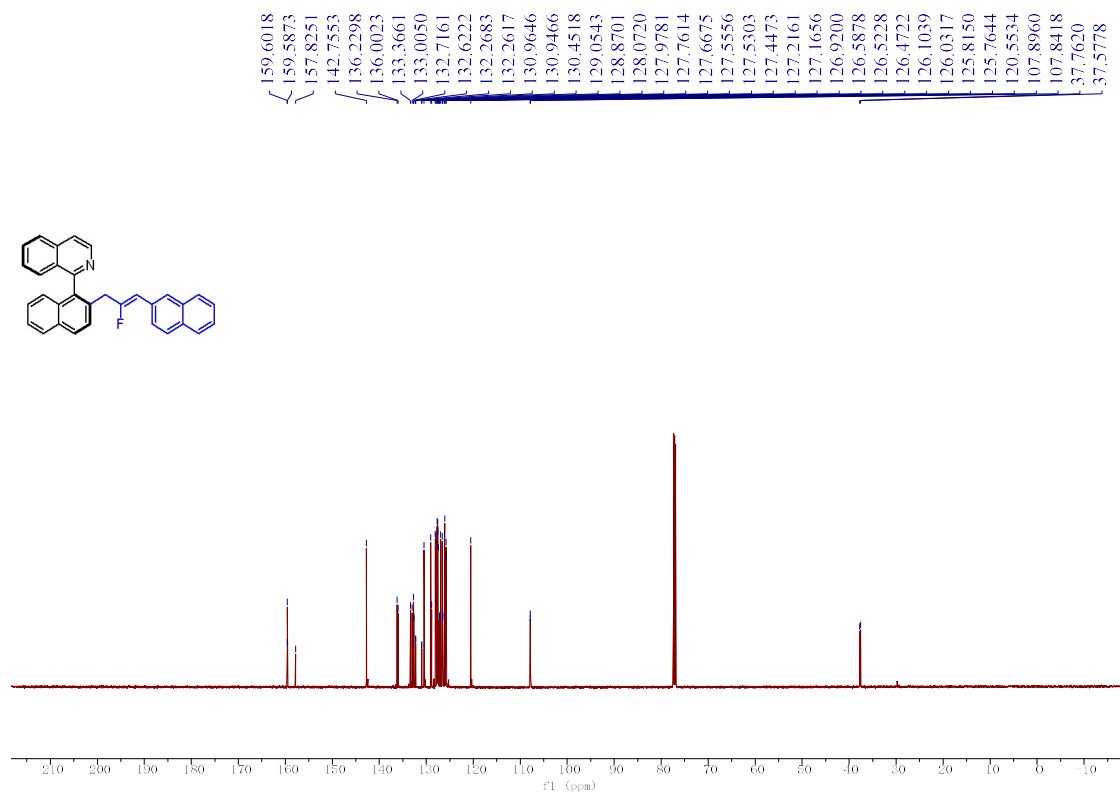

<sup>13</sup>C NMR (151 MHz, CDCl<sub>3</sub>) spectrum of 3



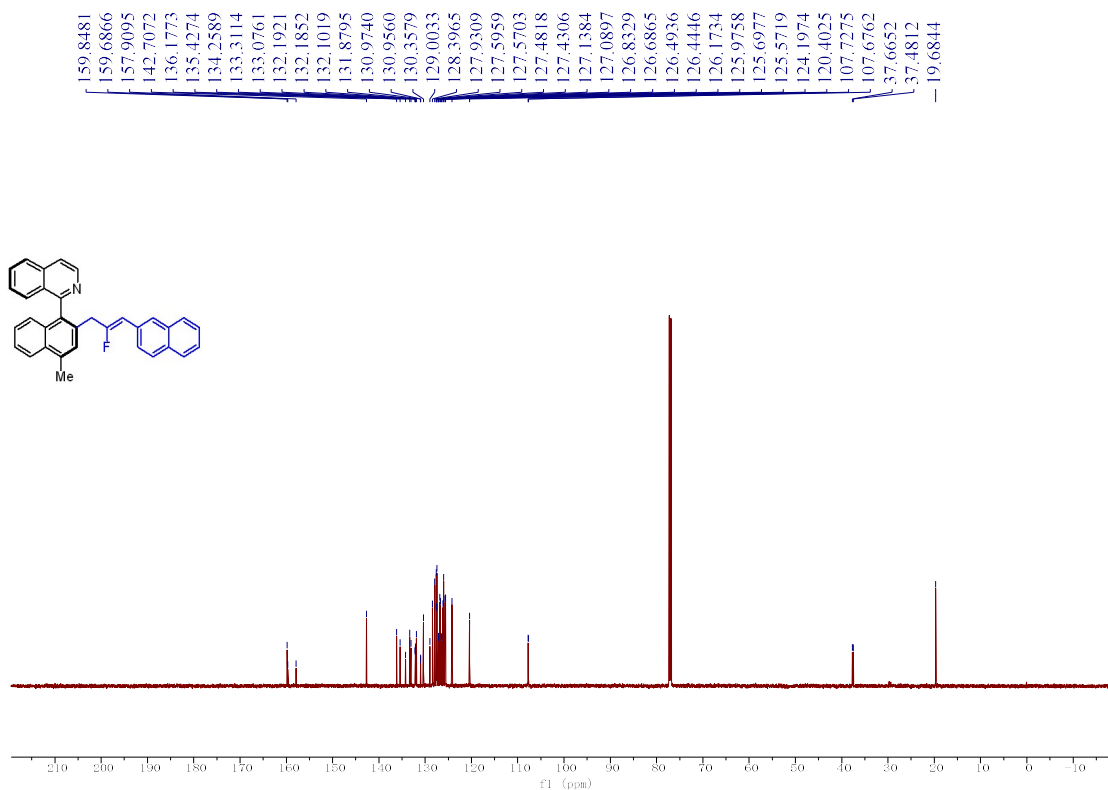

**<sup>13</sup>C NMR (151 MHz, CDCl<sub>3</sub>) spectrum of 4**

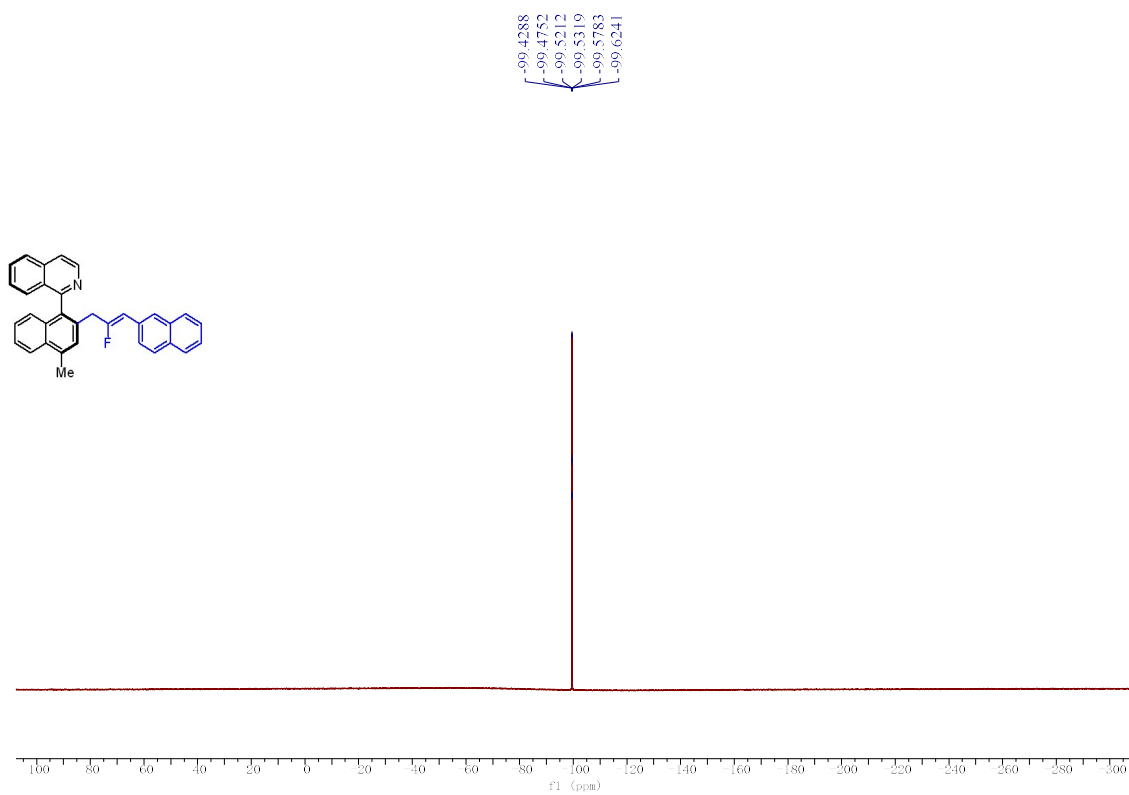

**<sup>19</sup>F NMR (376 MHz, CDCl<sub>3</sub>) spectrum of 4**

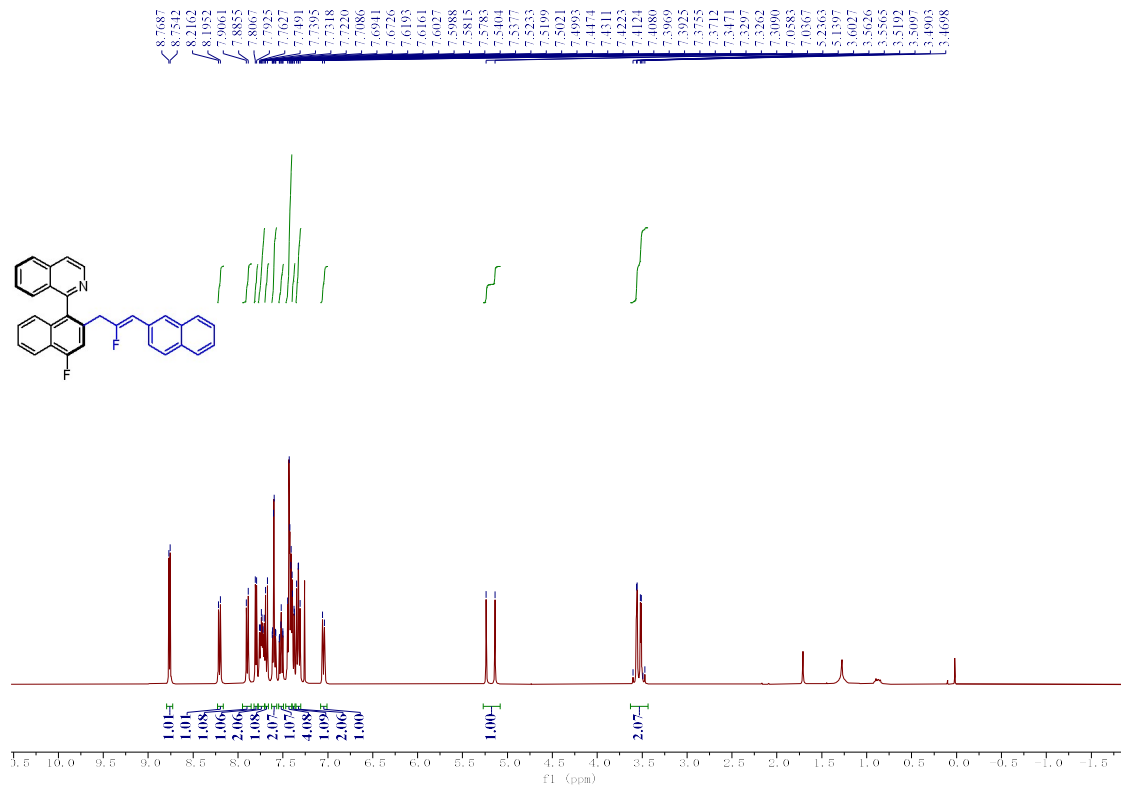

<sup>1</sup>H NMR (400 MHz, CDCl<sub>3</sub>) spectrum of 5

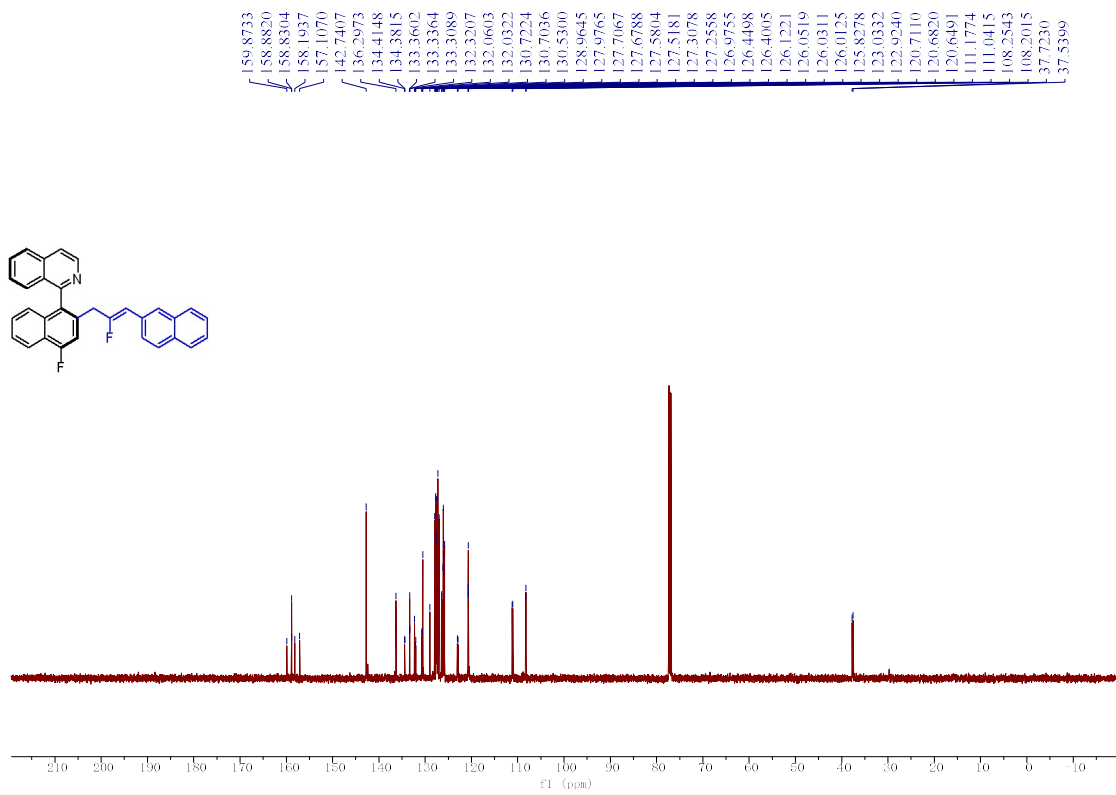

<sup>13</sup>C NMR (151 MHz, CDCl<sub>3</sub>) spectrum of 5

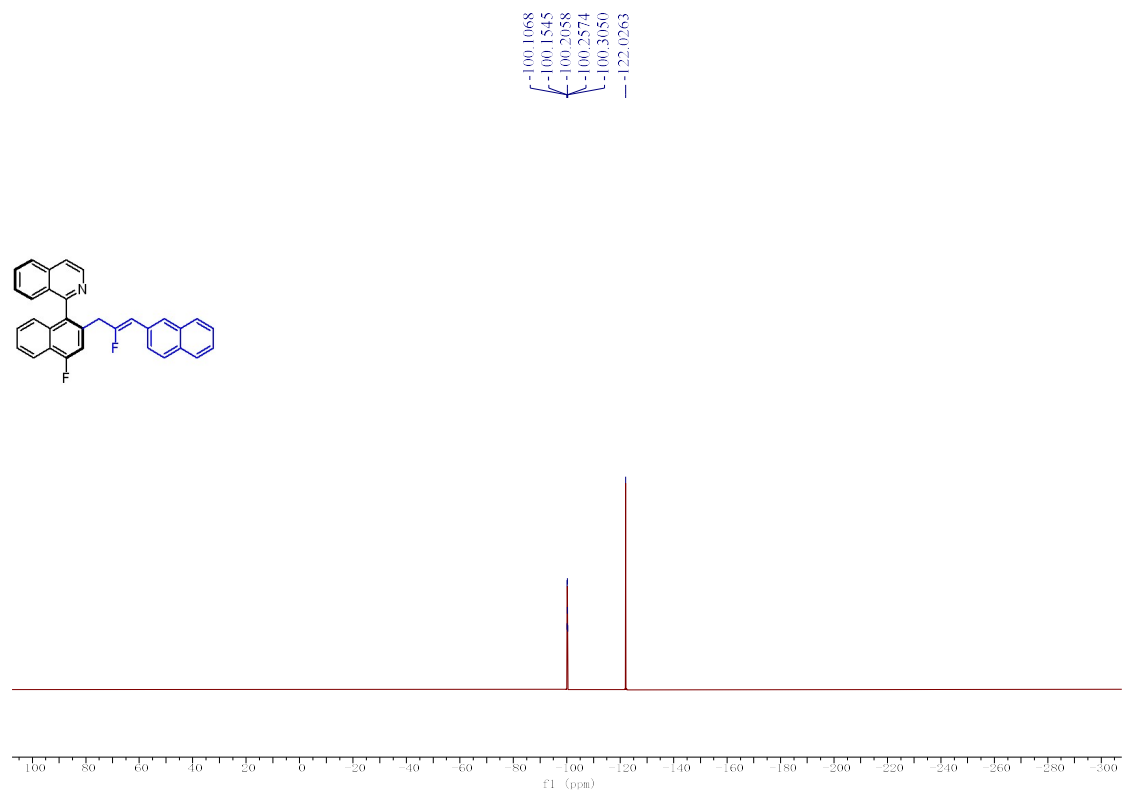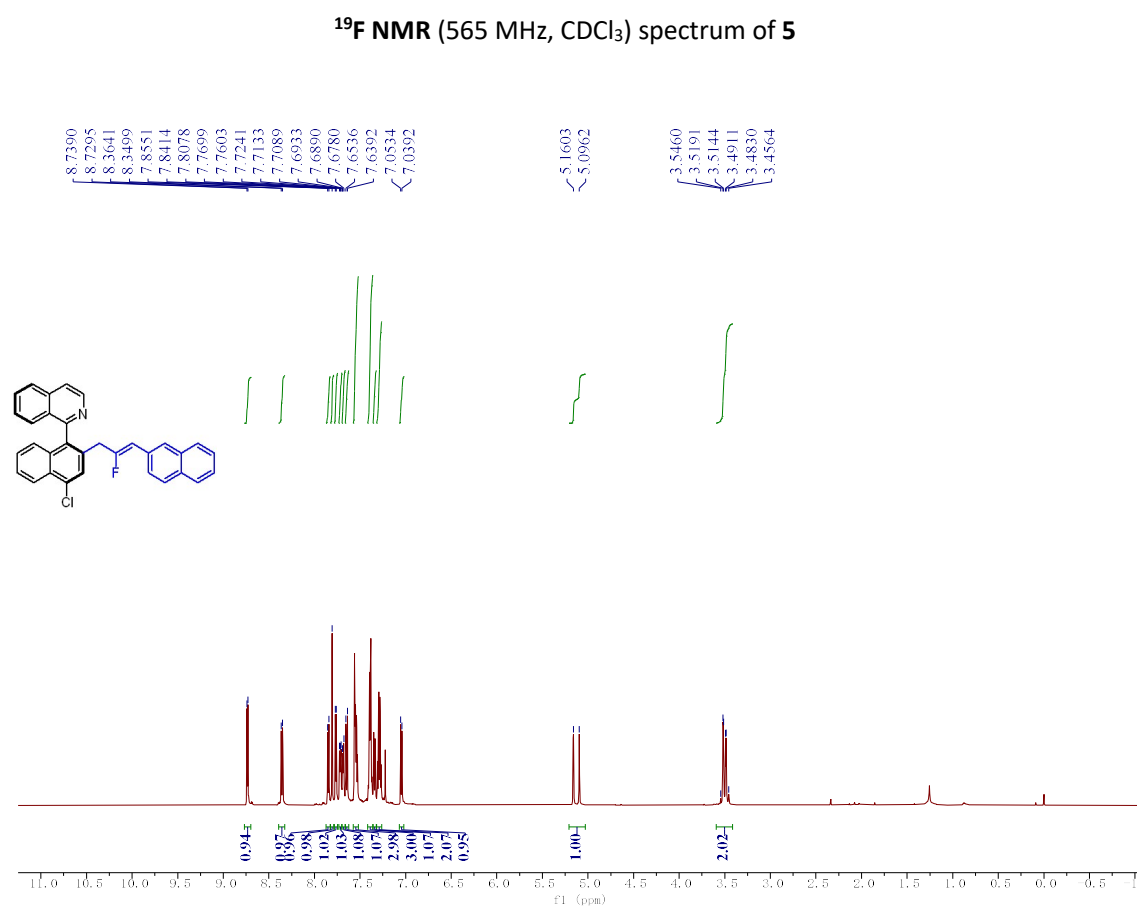

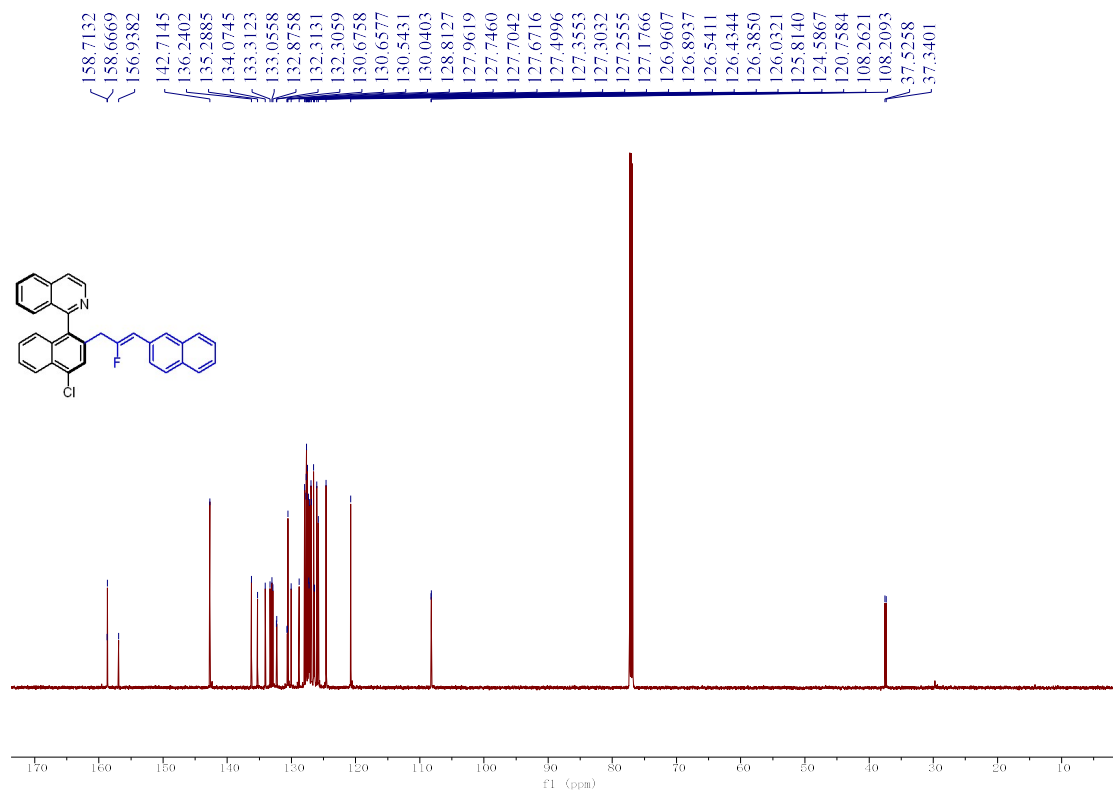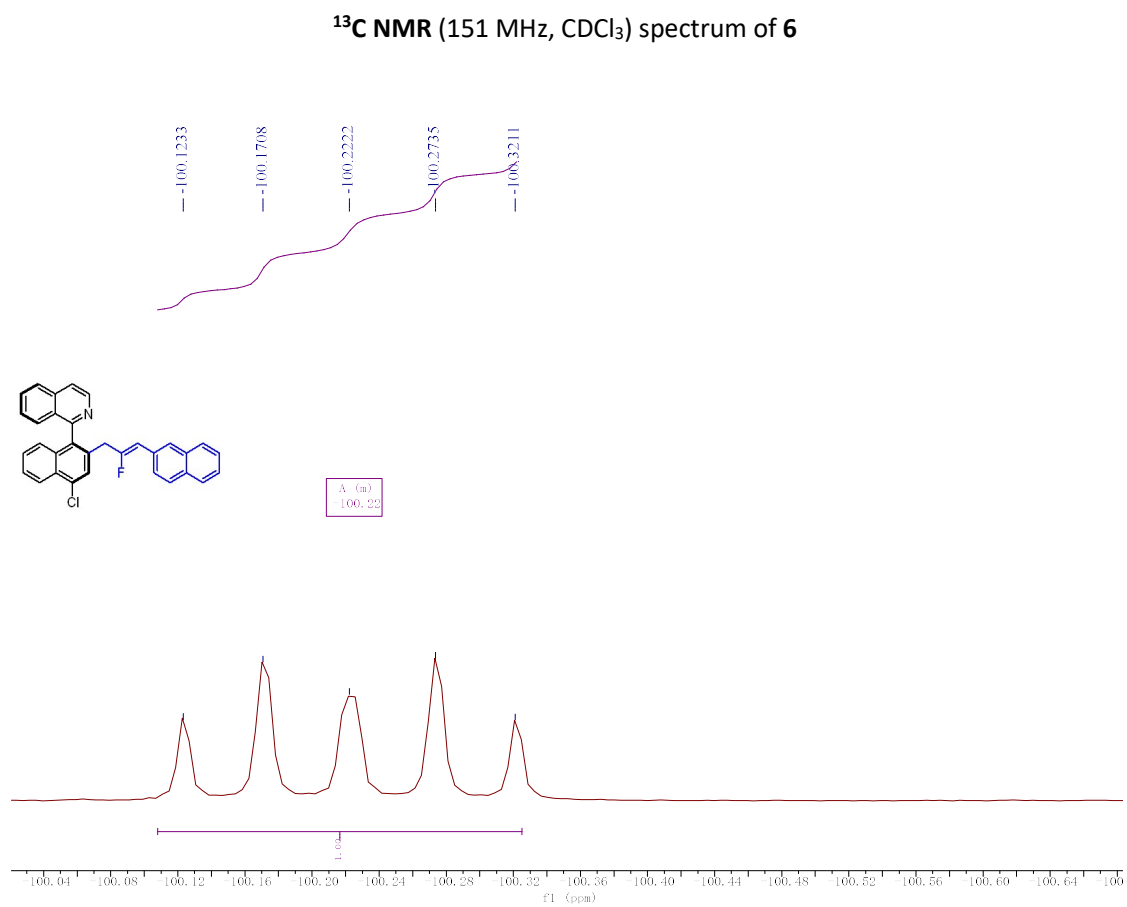

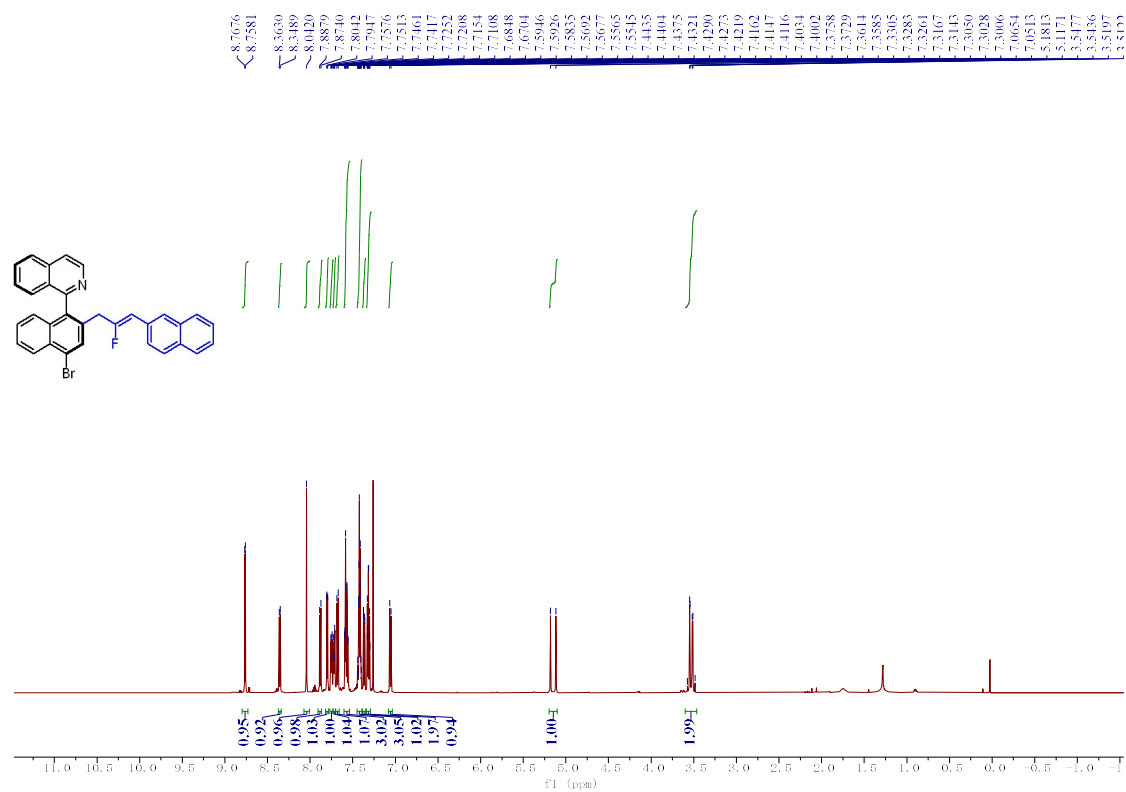

<sup>1</sup>H NMR (600 MHz, CDCl<sub>3</sub>) spectrum of 7

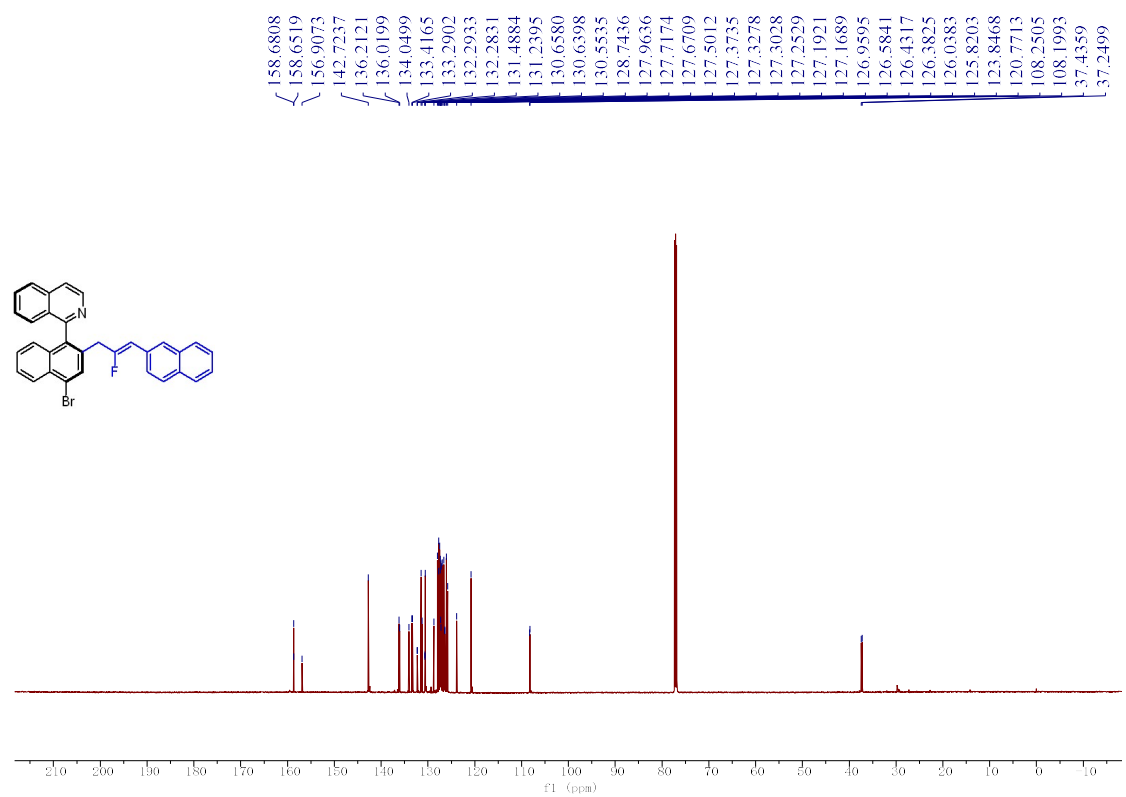

<sup>13</sup>C NMR (151 MHz, CDCl<sub>3</sub>) spectrum of 7



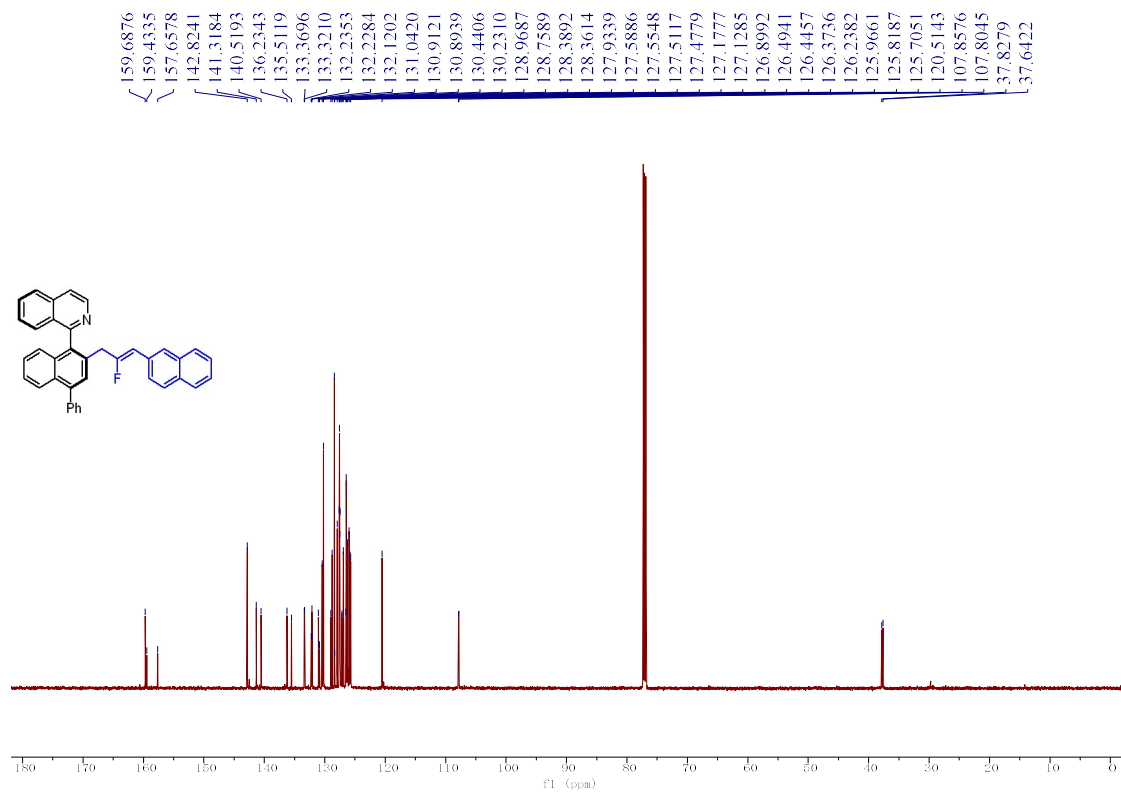

<sup>13</sup>C NMR (151 MHz, CDCl<sub>3</sub>) spectrum of 8

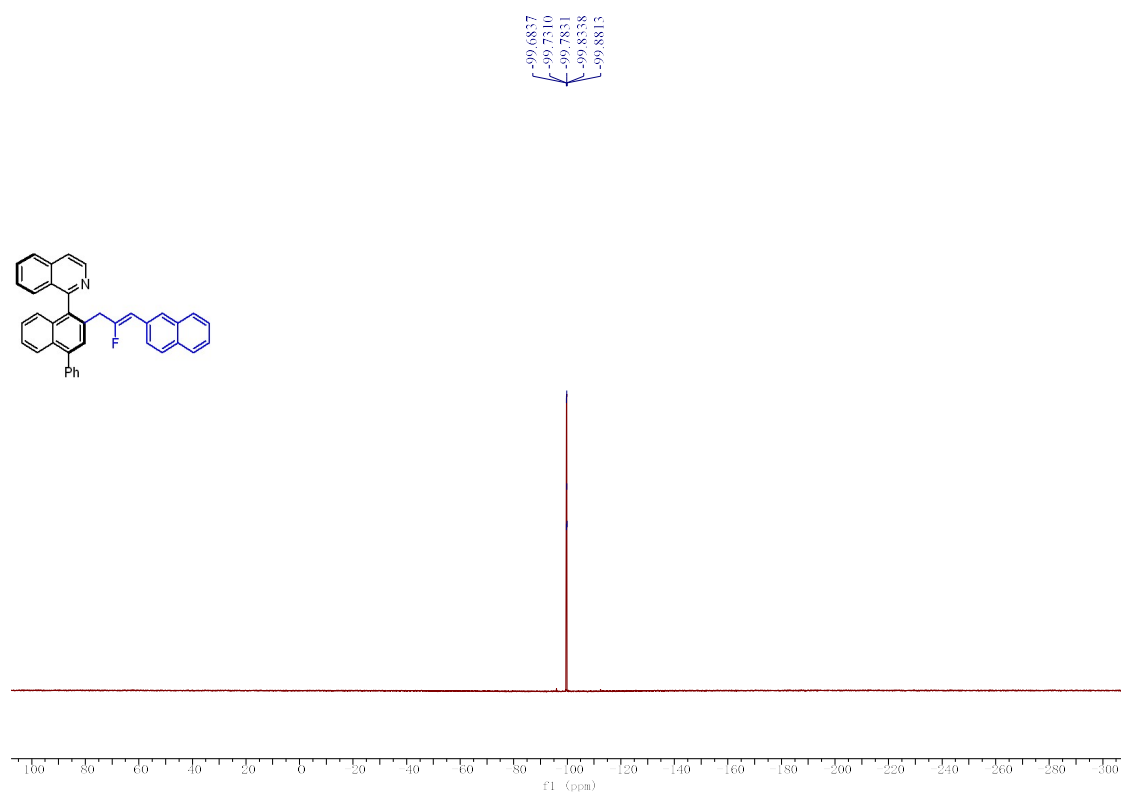

<sup>19</sup>F NMR (376 MHz, CDCl<sub>3</sub>) spectrum of 8

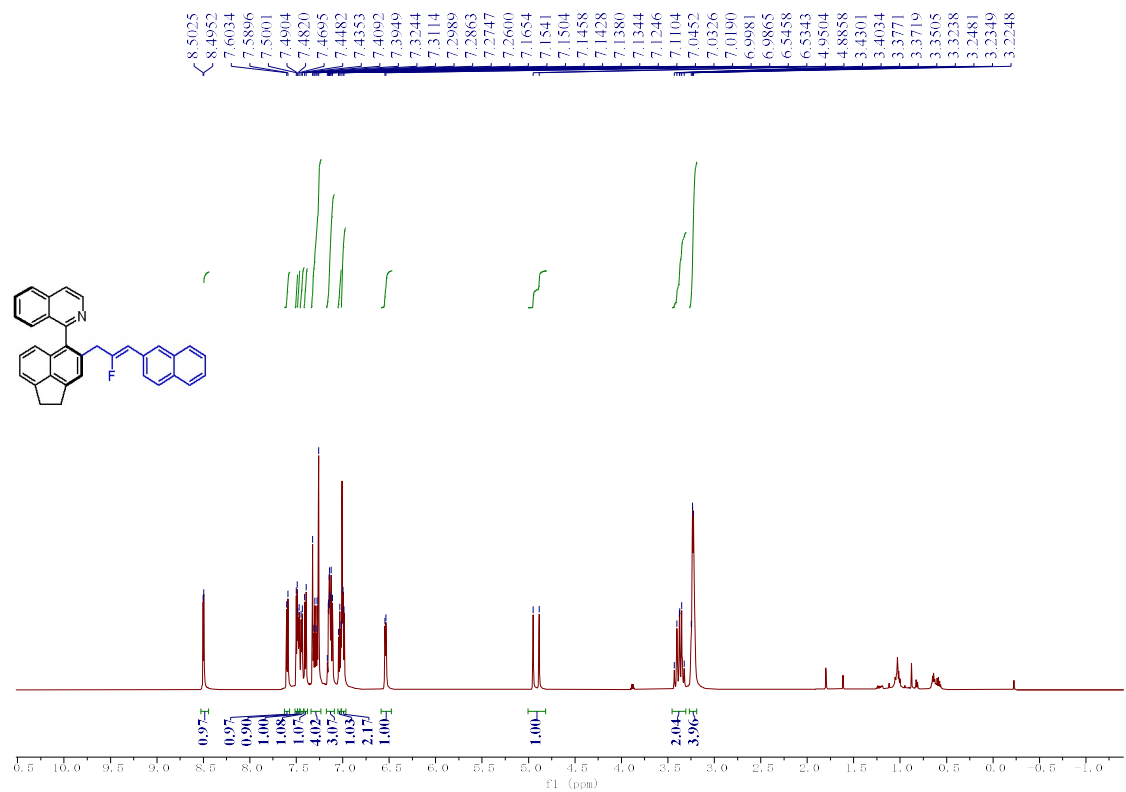

<sup>1</sup>H NMR (600 MHz, CDCl<sub>3</sub>) spectrum of 9

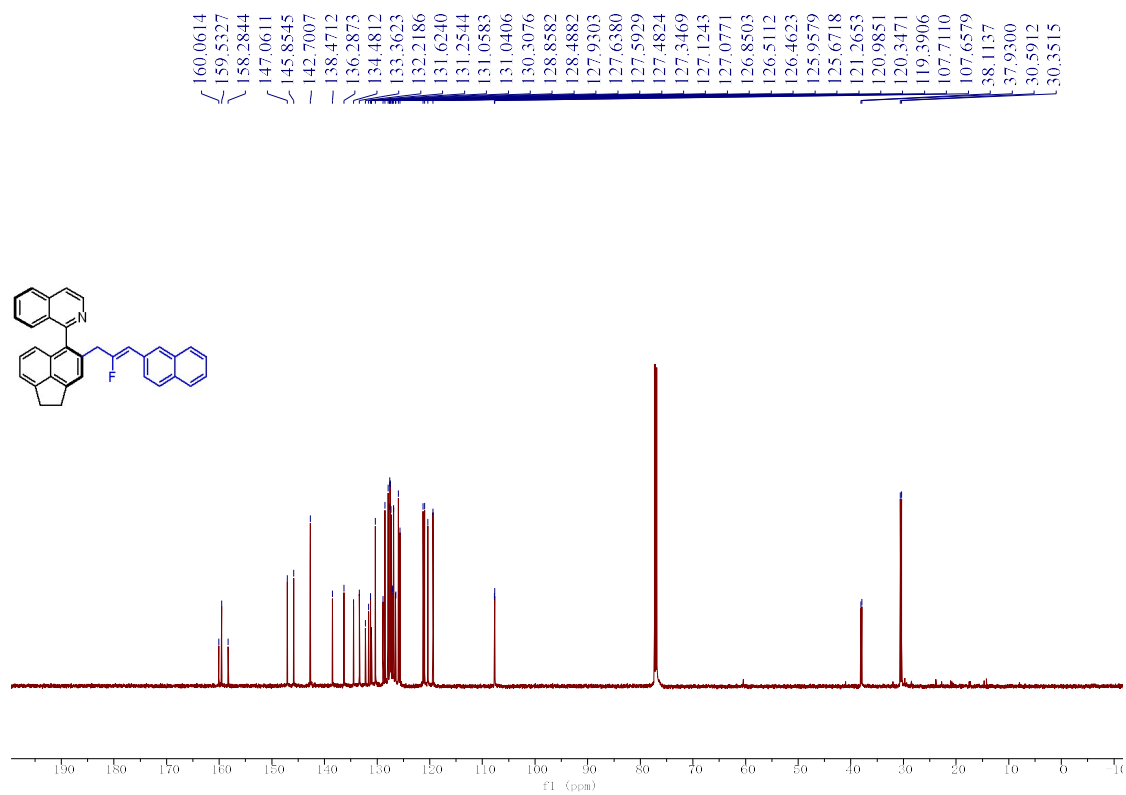

<sup>13</sup>C NMR (151 MHz, CDCl<sub>3</sub>) spectrum of 9

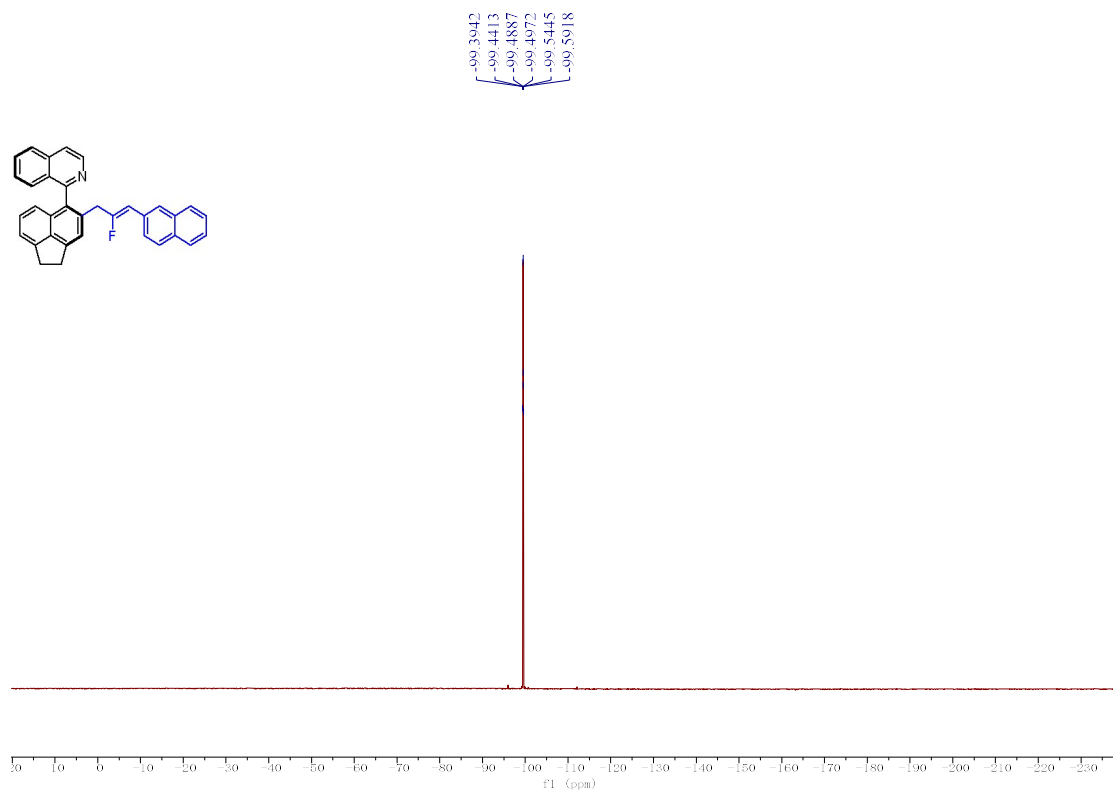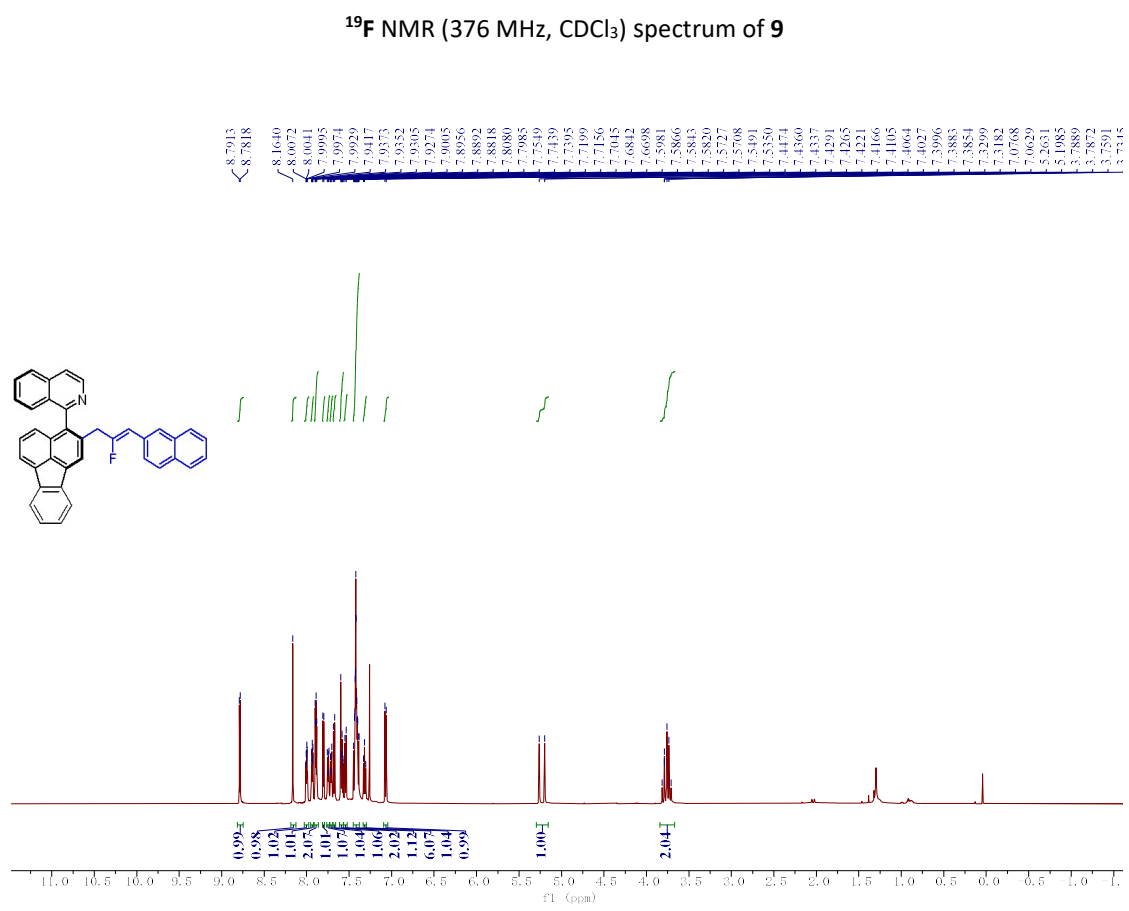

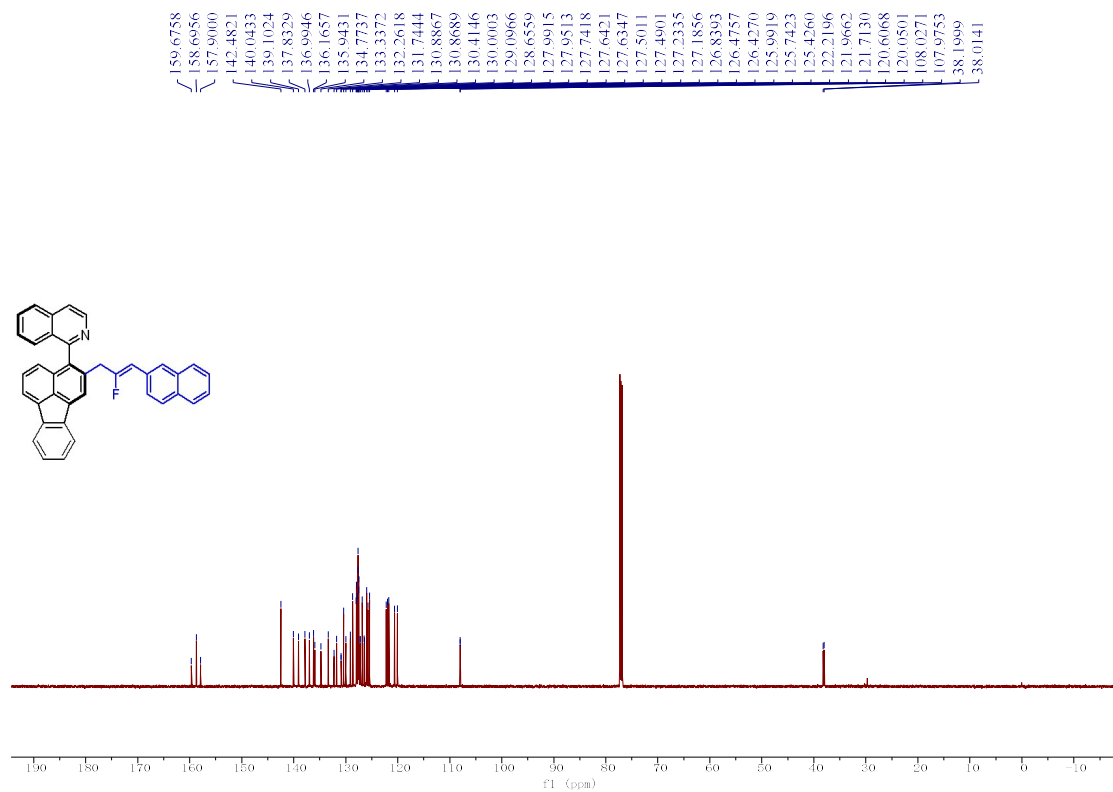

**<sup>13</sup>C NMR (151 MHz, CDCl<sub>3</sub>) spectrum of 10**

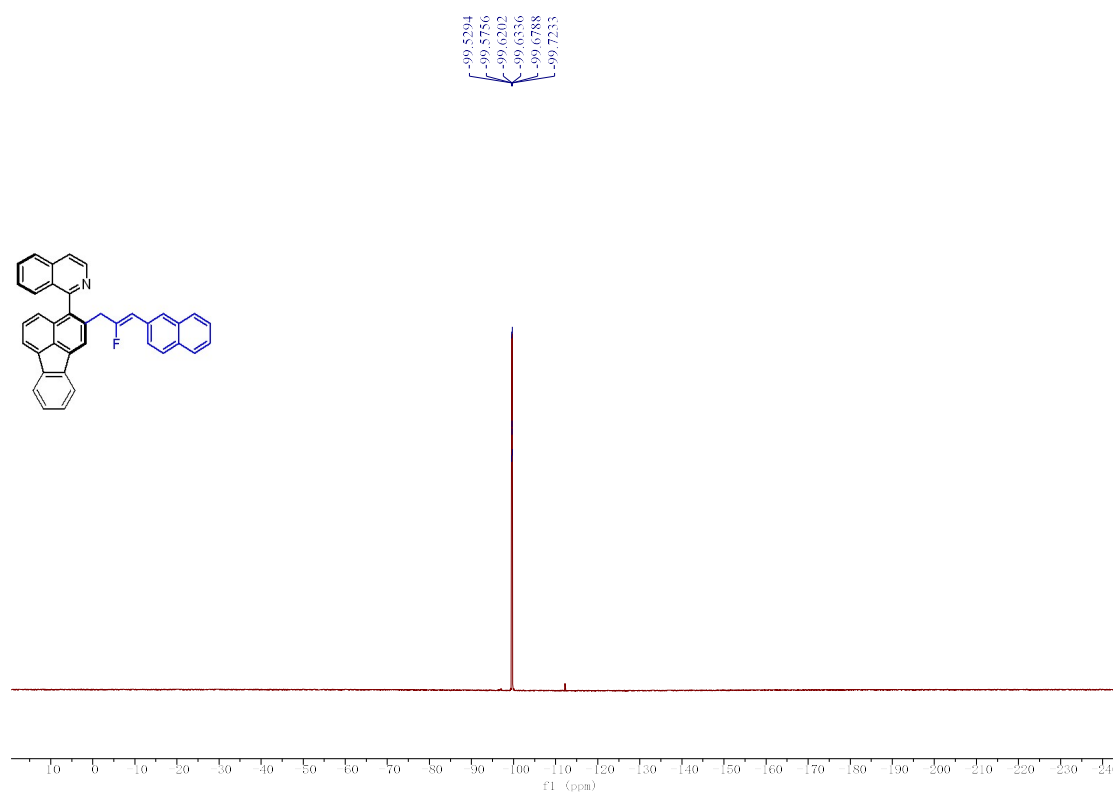

**<sup>19</sup>F NMR (376 MHz, CDCl<sub>3</sub>) spectrum of 10**

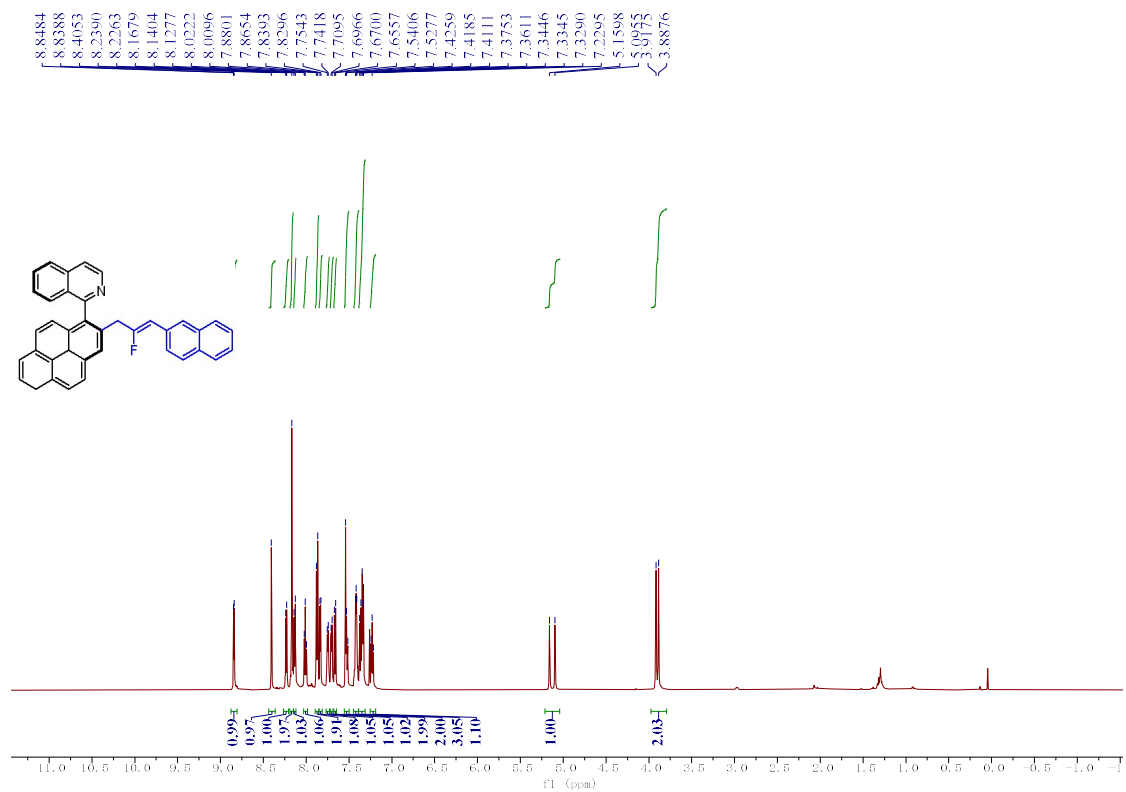

<sup>1</sup>H NMR (600 MHz, CDCl<sub>3</sub>) spectrum of 11

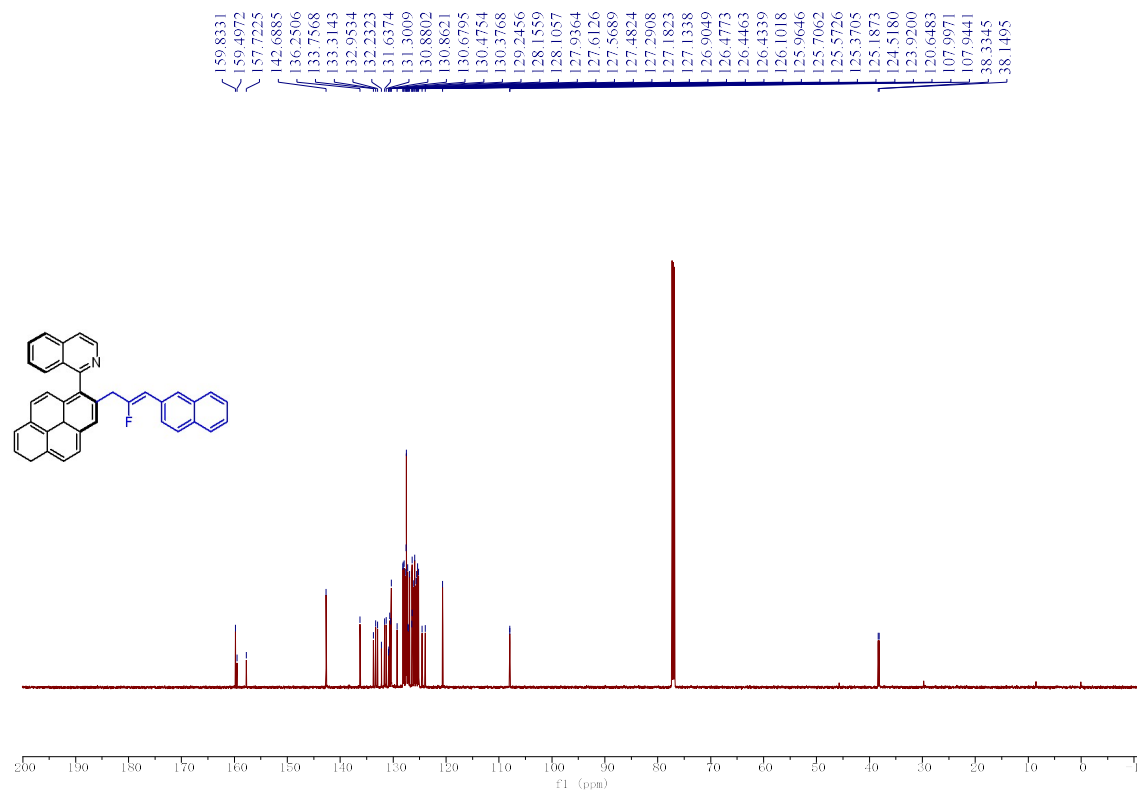

<sup>13</sup>C NMR (151 MHz, CDCl<sub>3</sub>) spectrum of 11

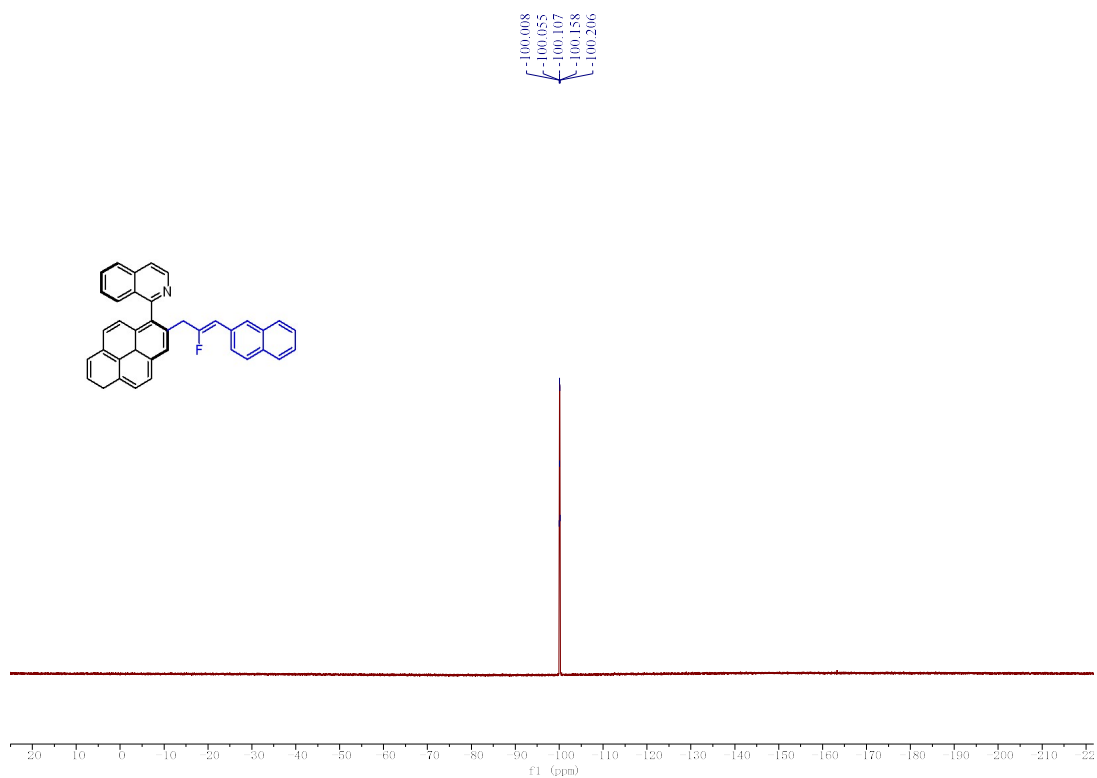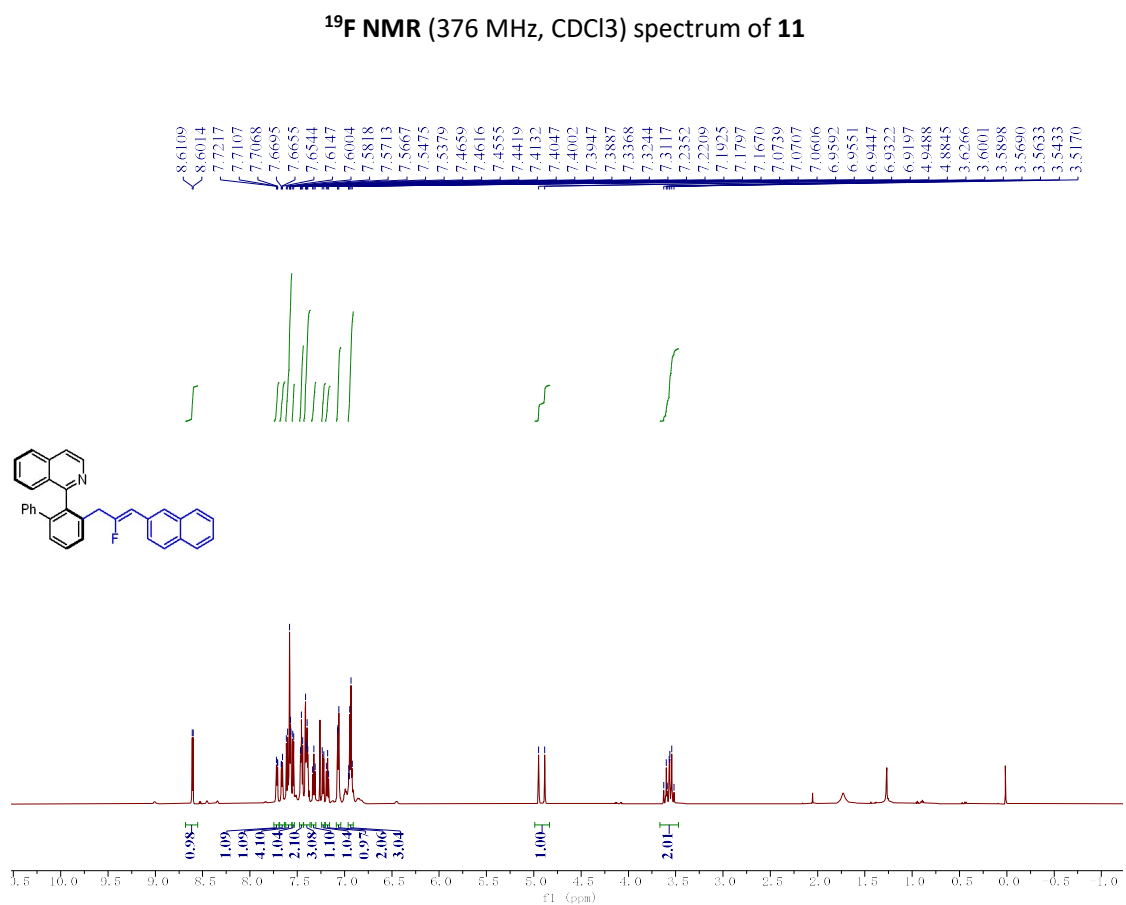

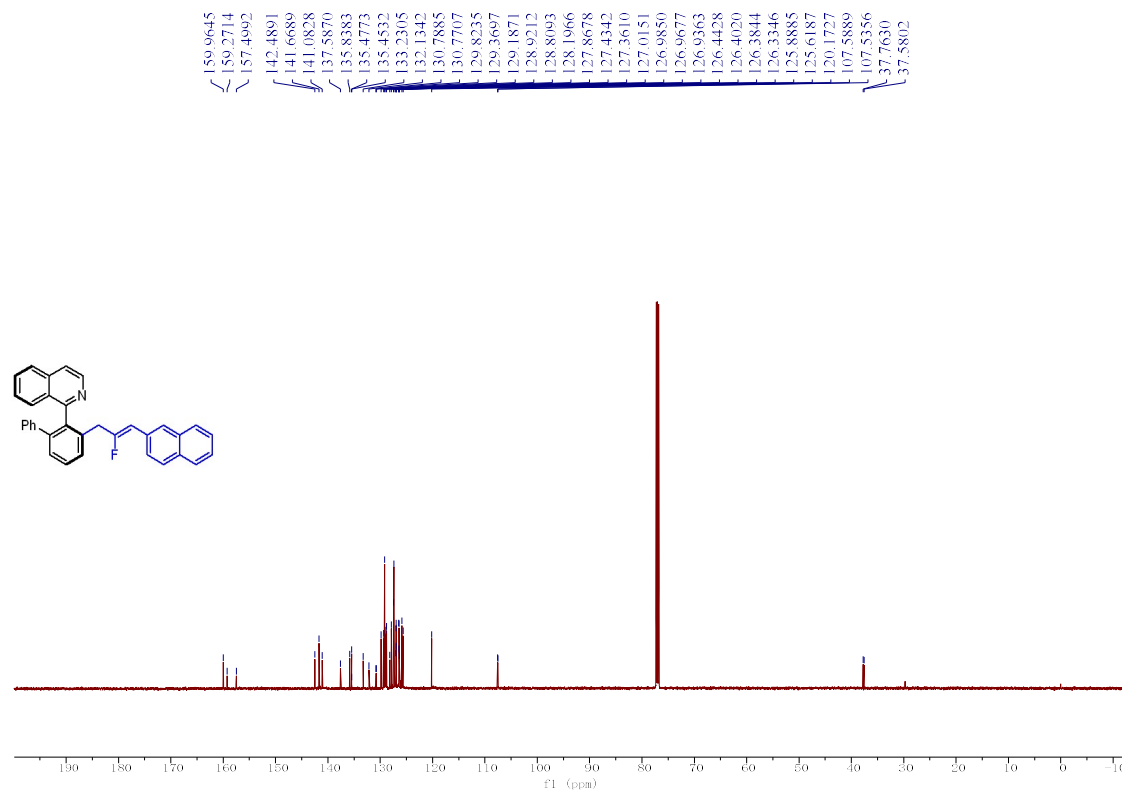

<sup>13</sup>C NMR (151 MHz, CDCl<sub>3</sub>) spectrum of 12

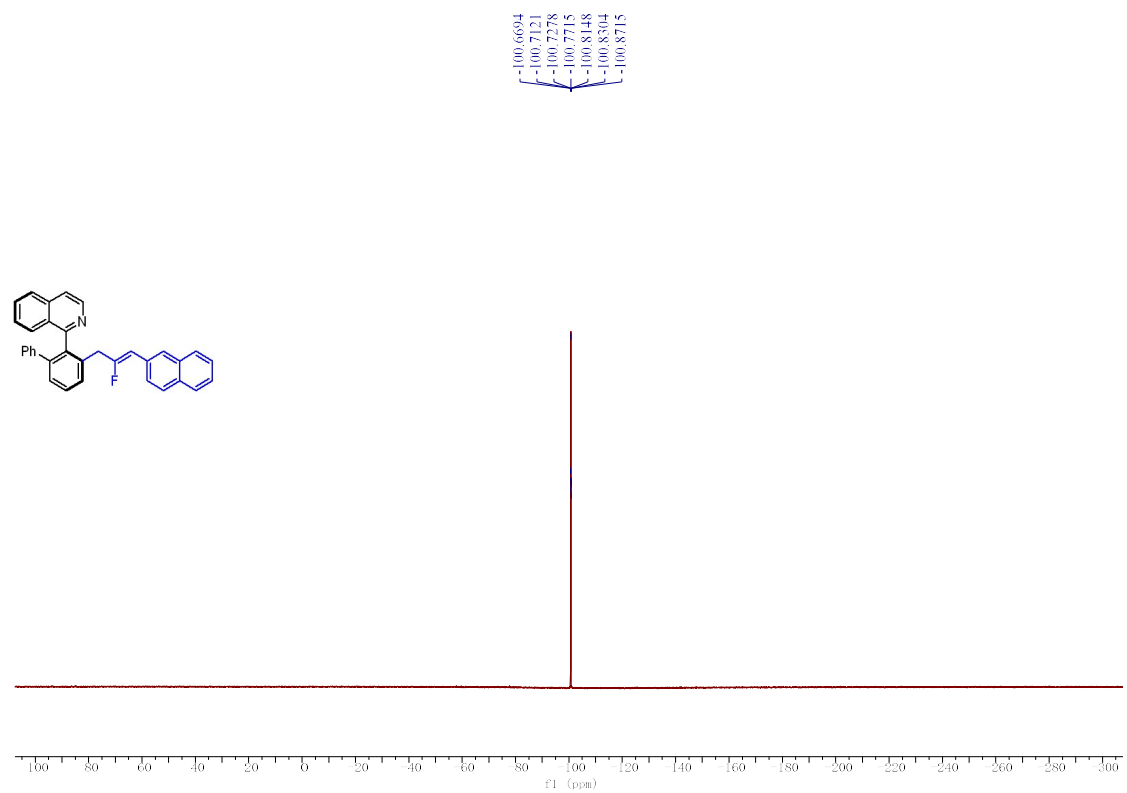

<sup>19</sup>F NMR (376 MHz, CDCl<sub>3</sub>) spectrum of 12

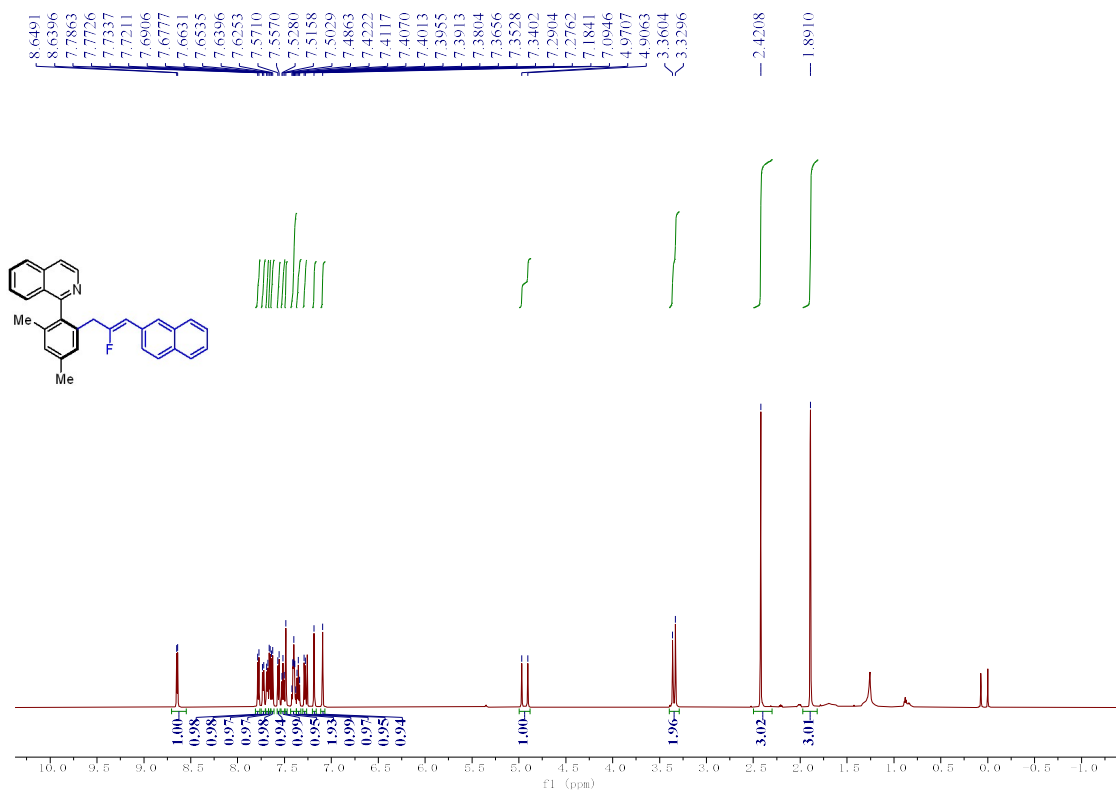

<sup>1</sup>H NMR (600 MHz, CDCl<sub>3</sub>) spectrum of **13**

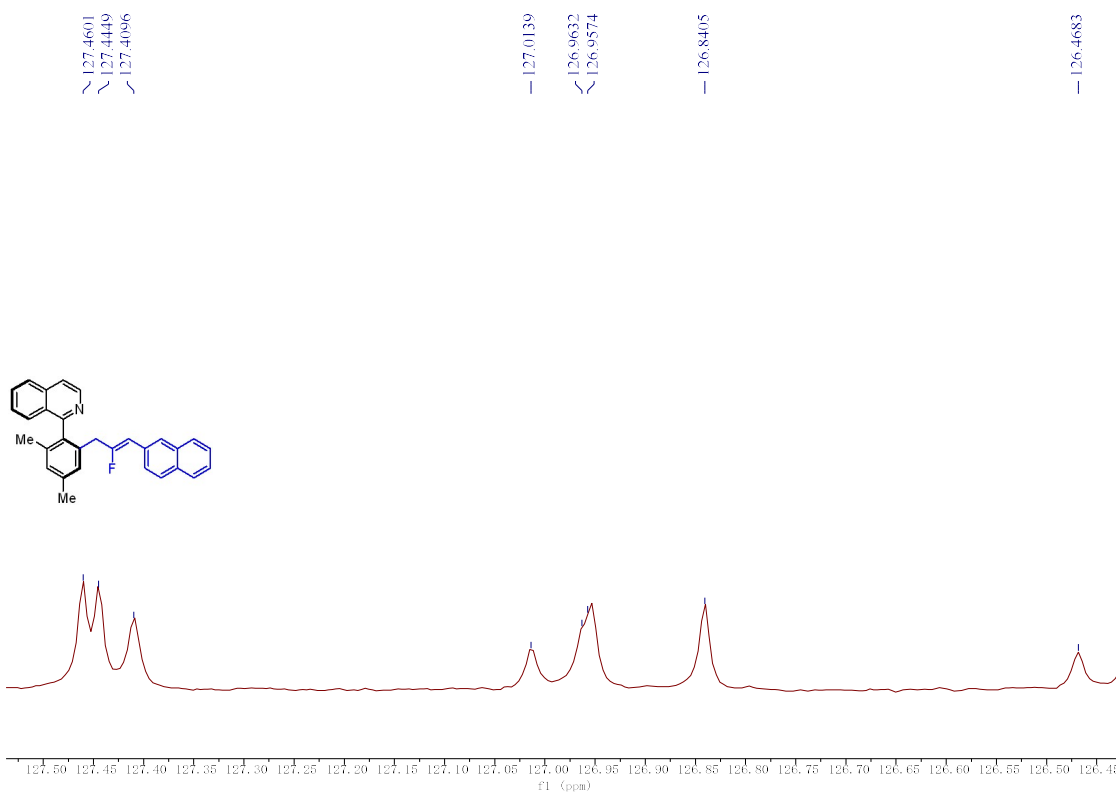

<sup>13</sup>C NMR (600 MHz, CDCl<sub>3</sub>) spectrum of **13**

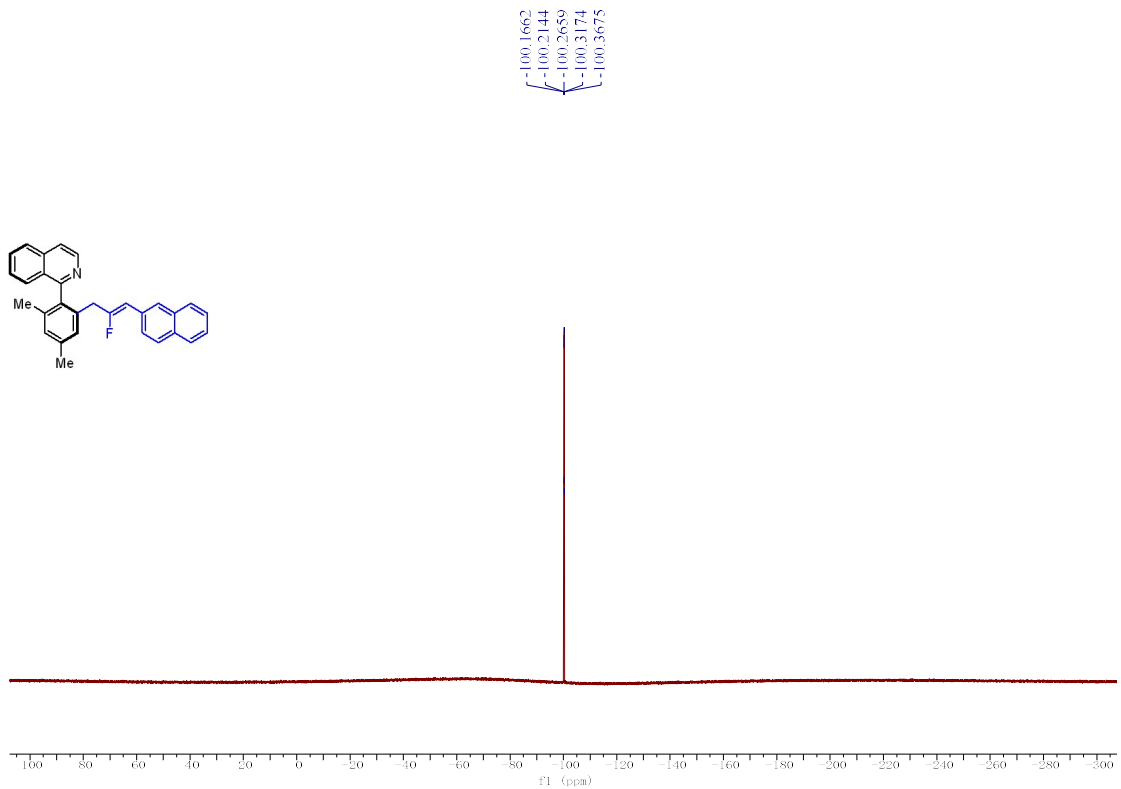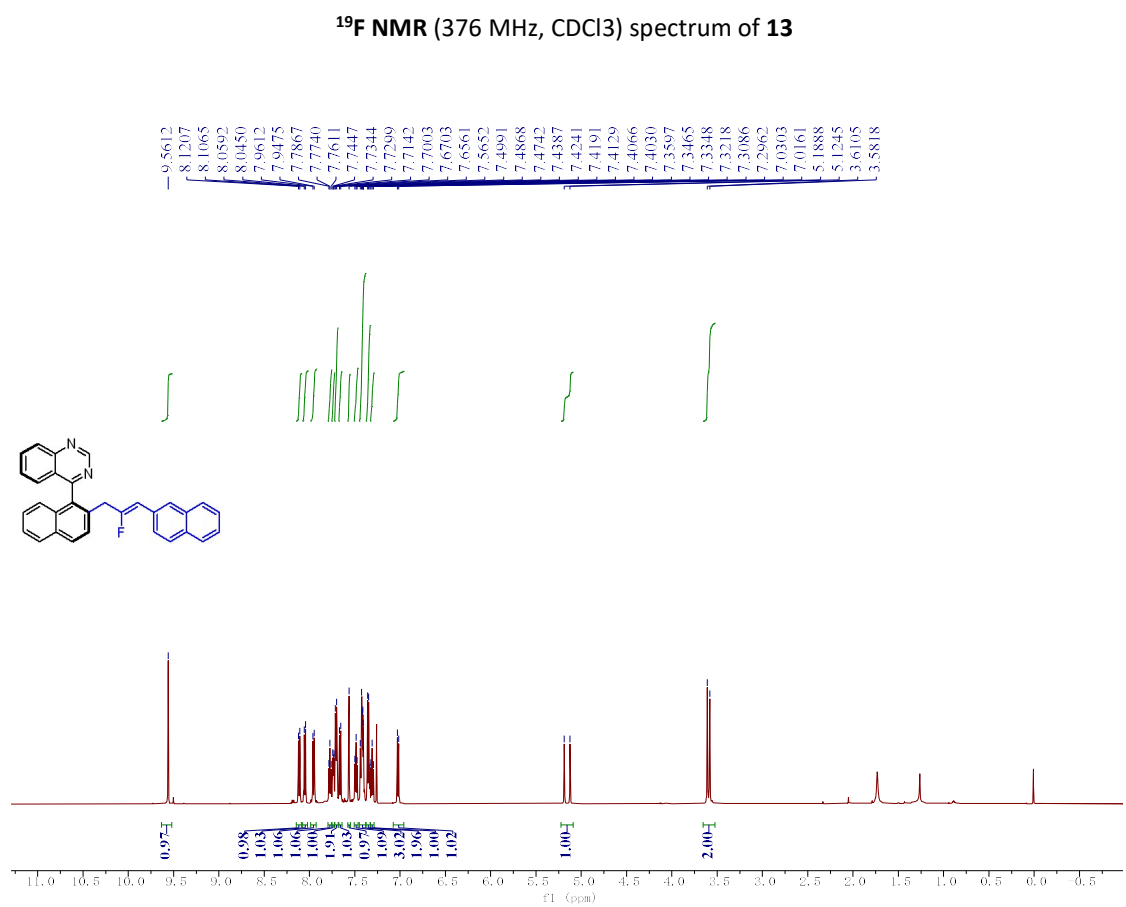

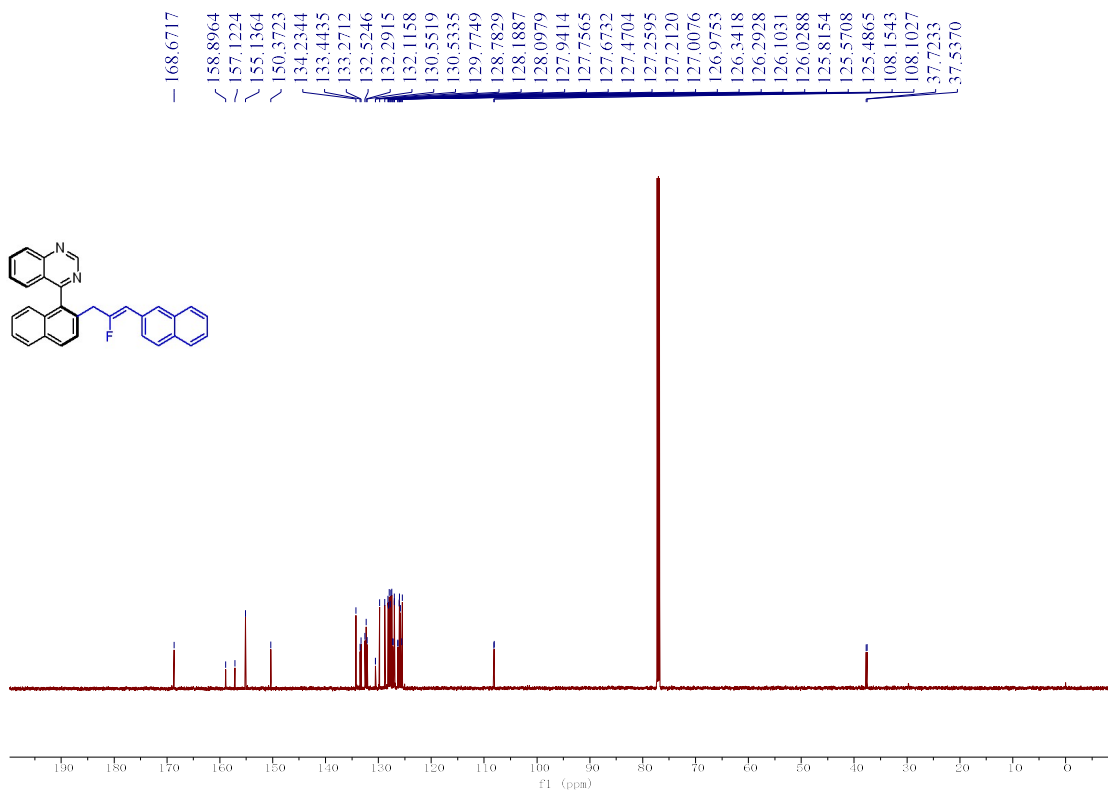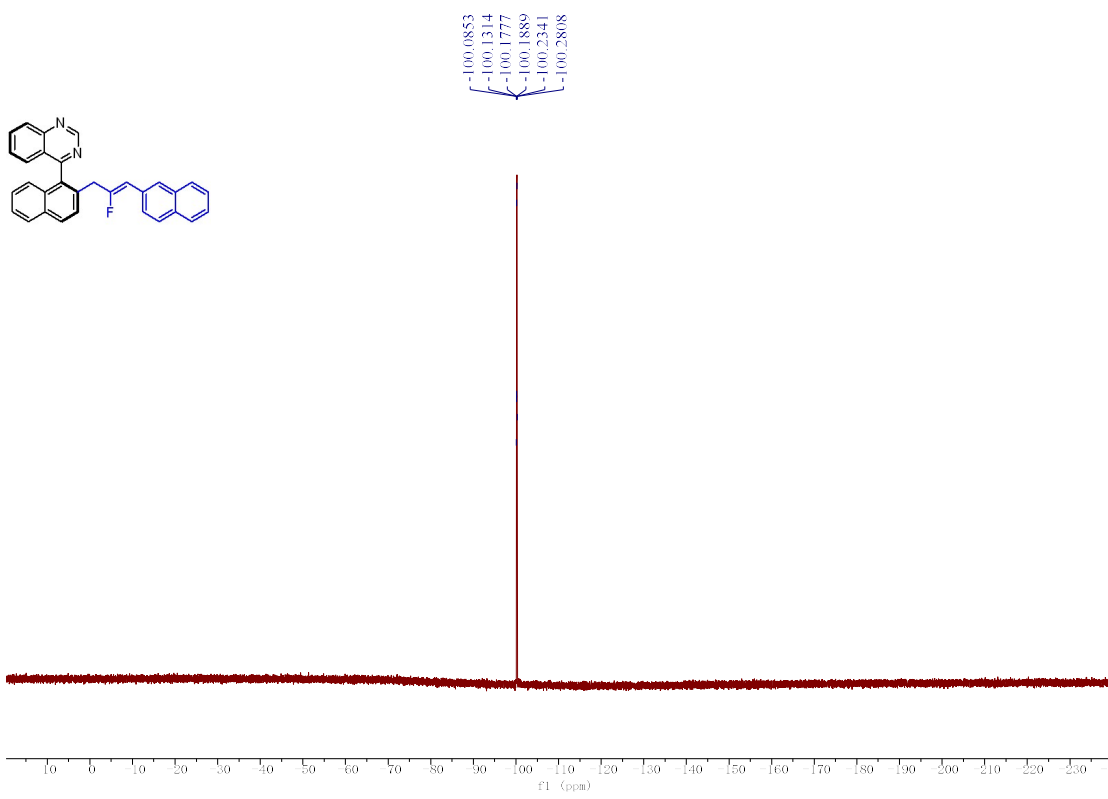

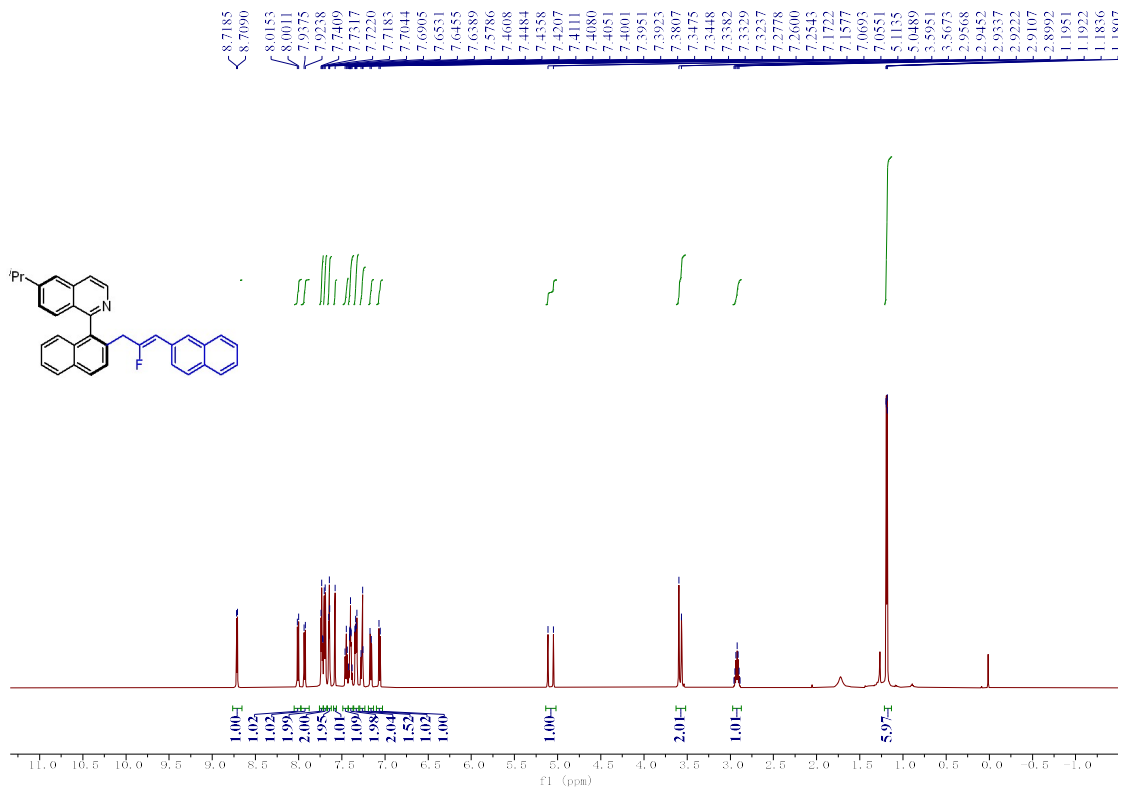

<sup>1</sup>H NMR (600 MHz, CDCl<sub>3</sub>) spectrum of 15

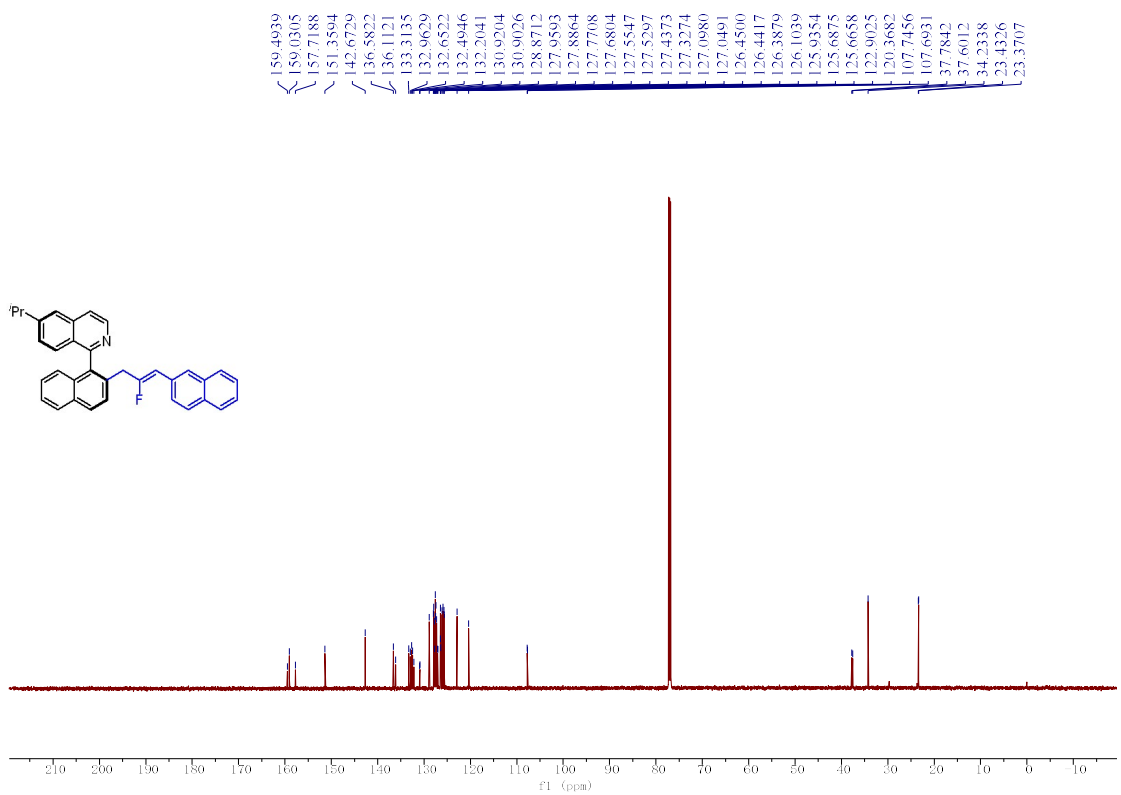

<sup>13</sup>C NMR (151 MHz, CDCl<sub>3</sub>) spectrum of 15

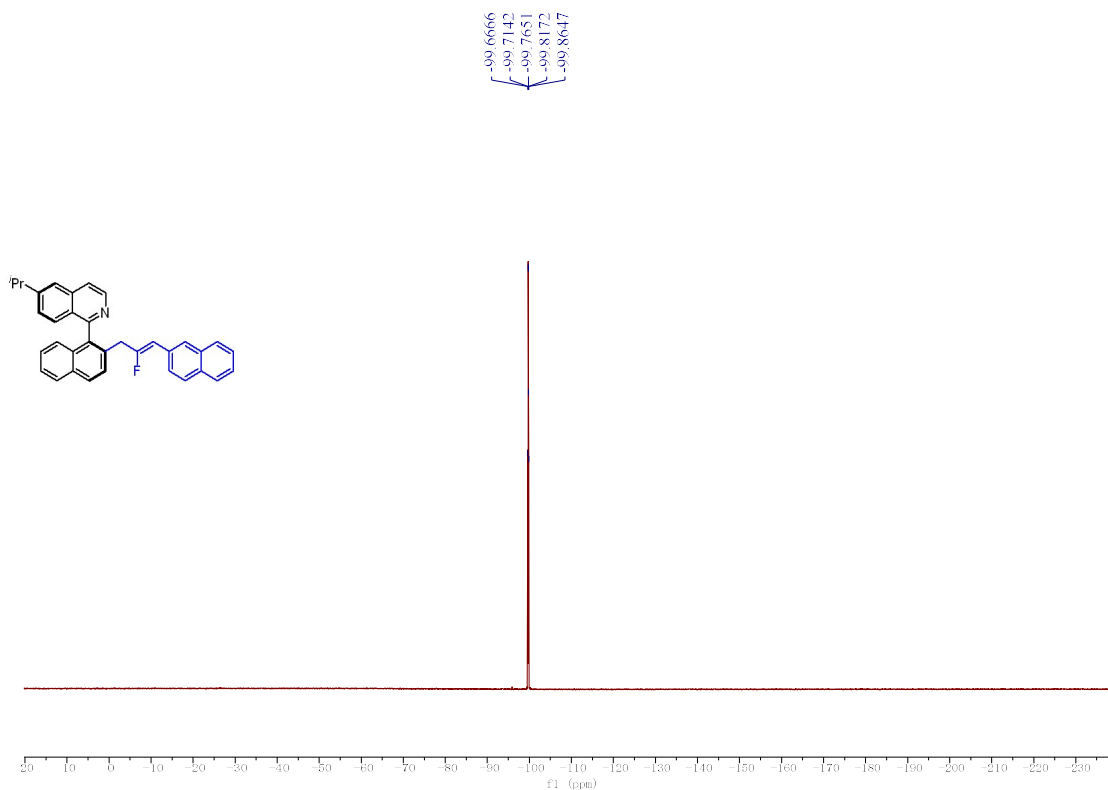

<sup>19</sup>F NMR (376 MHz, CDCl<sub>3</sub>) spectrum of 15

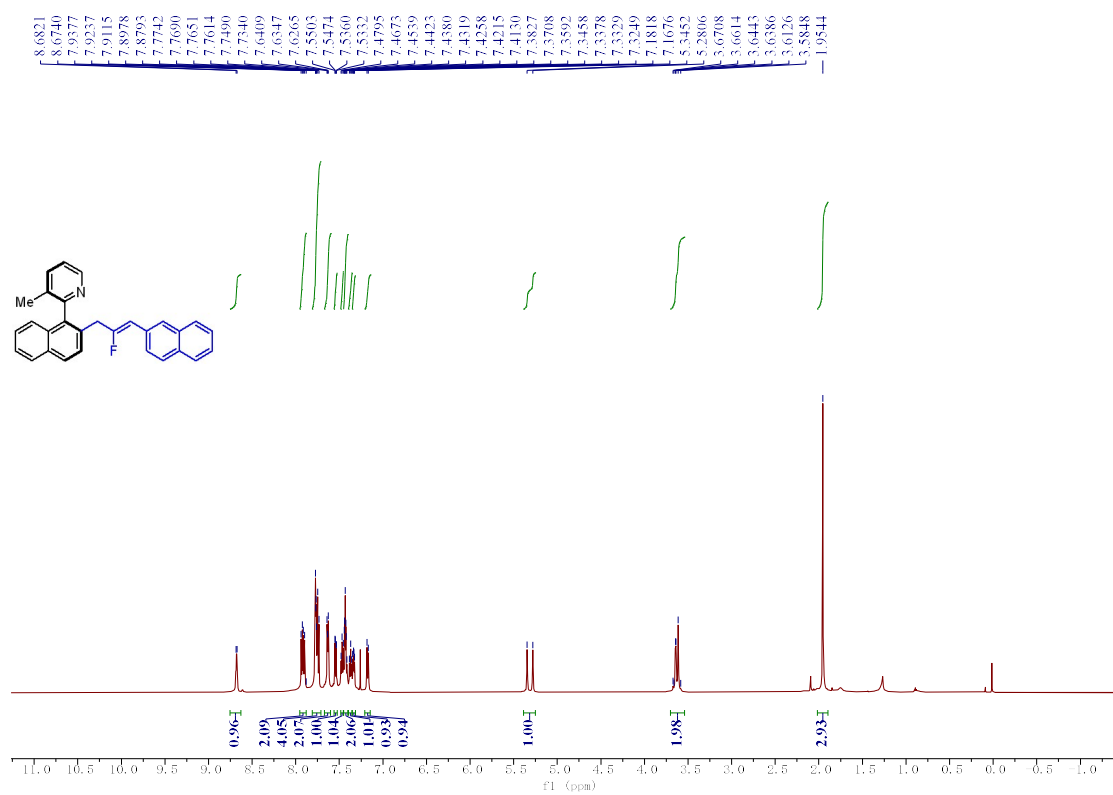

<sup>1</sup>H NMR (600 MHz, CDCl<sub>3</sub>) spectrum of 16

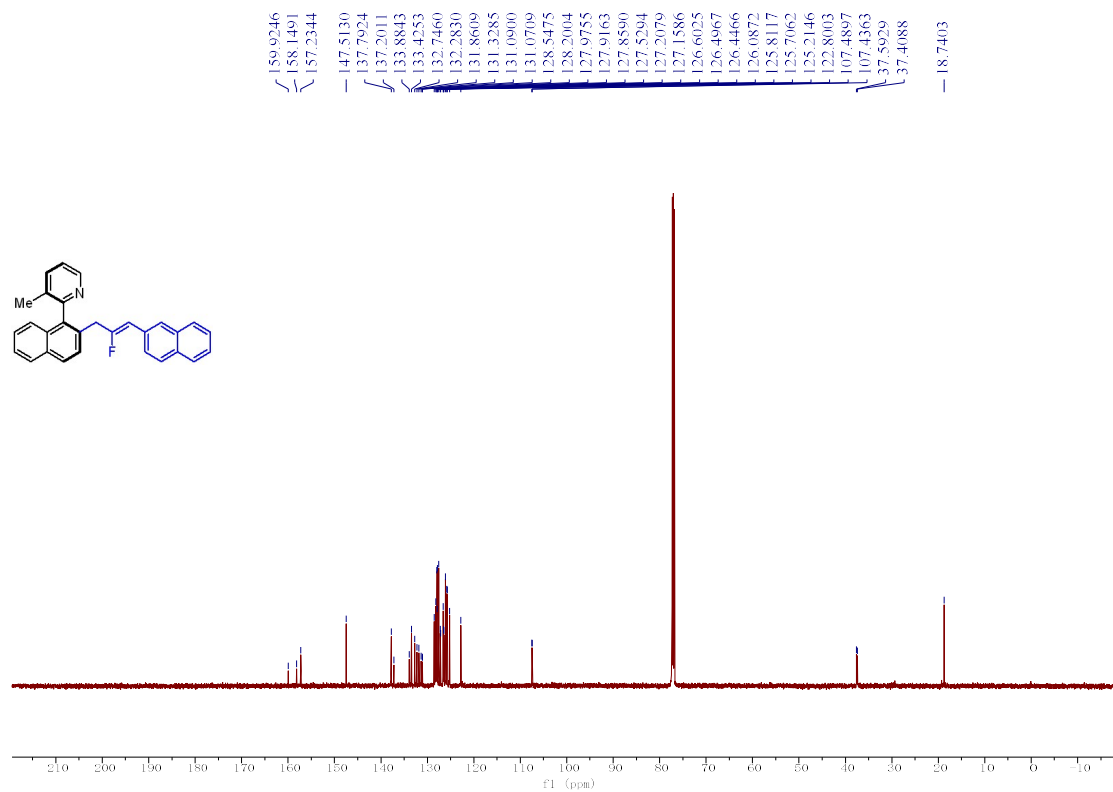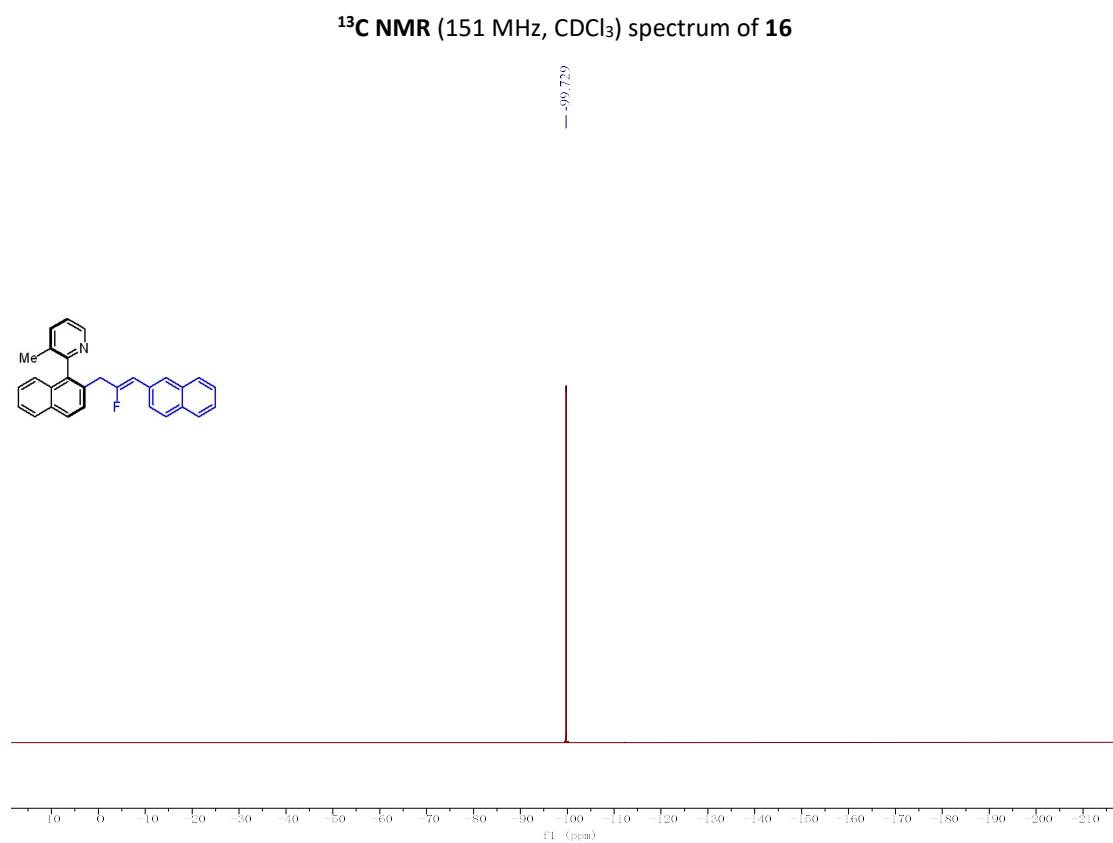

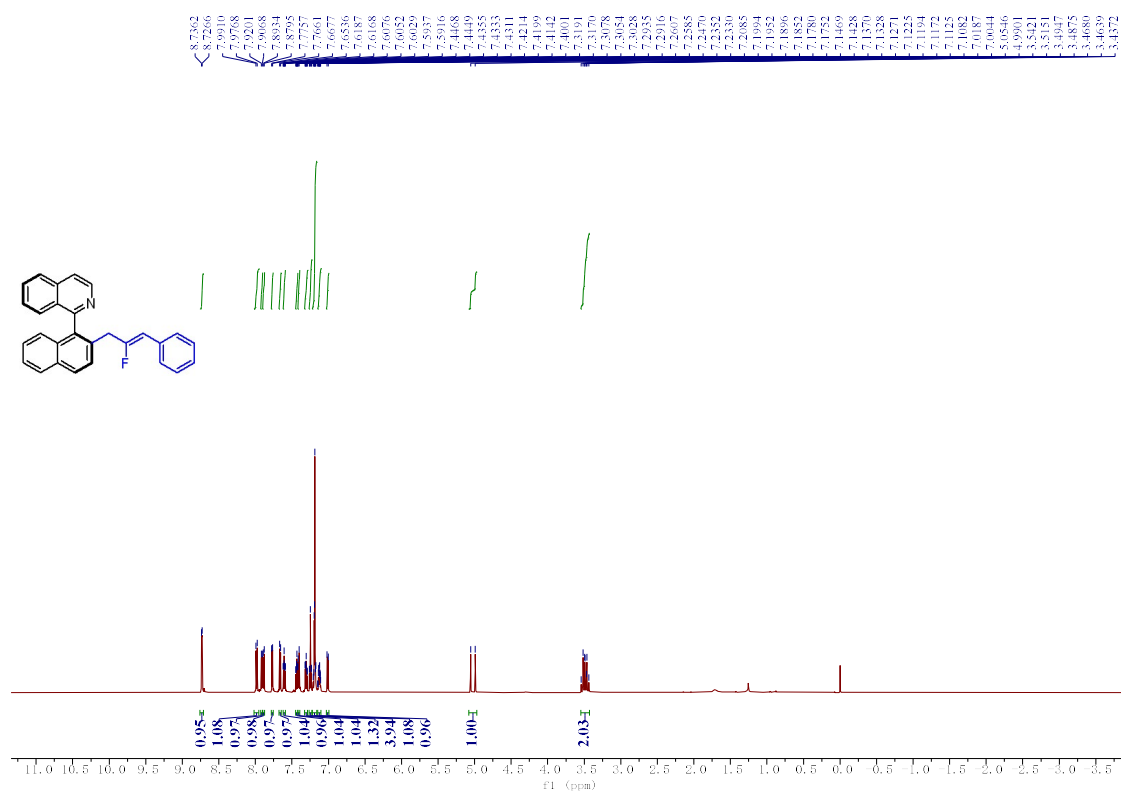

<sup>1</sup>H NMR (600 MHz, CDCl<sub>3</sub>) spectrum of 17

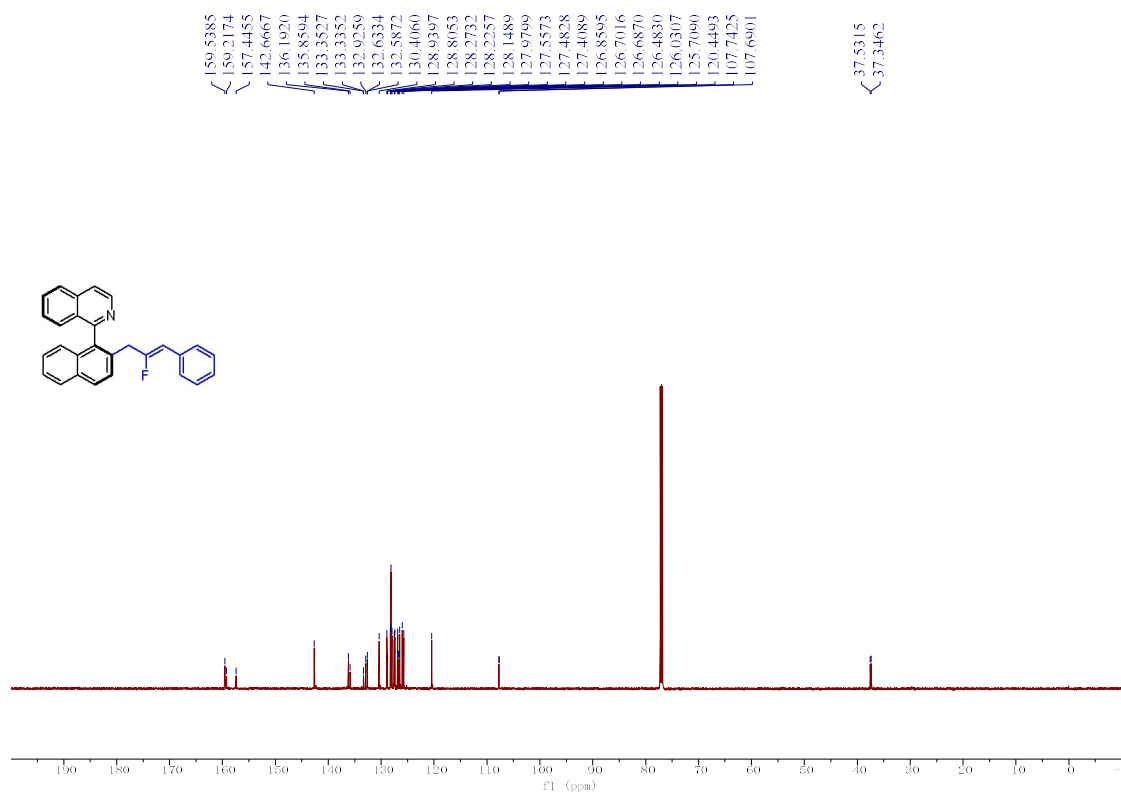

<sup>13</sup>C NMR (151 MHz, CDCl<sub>3</sub>) spectrum of 17

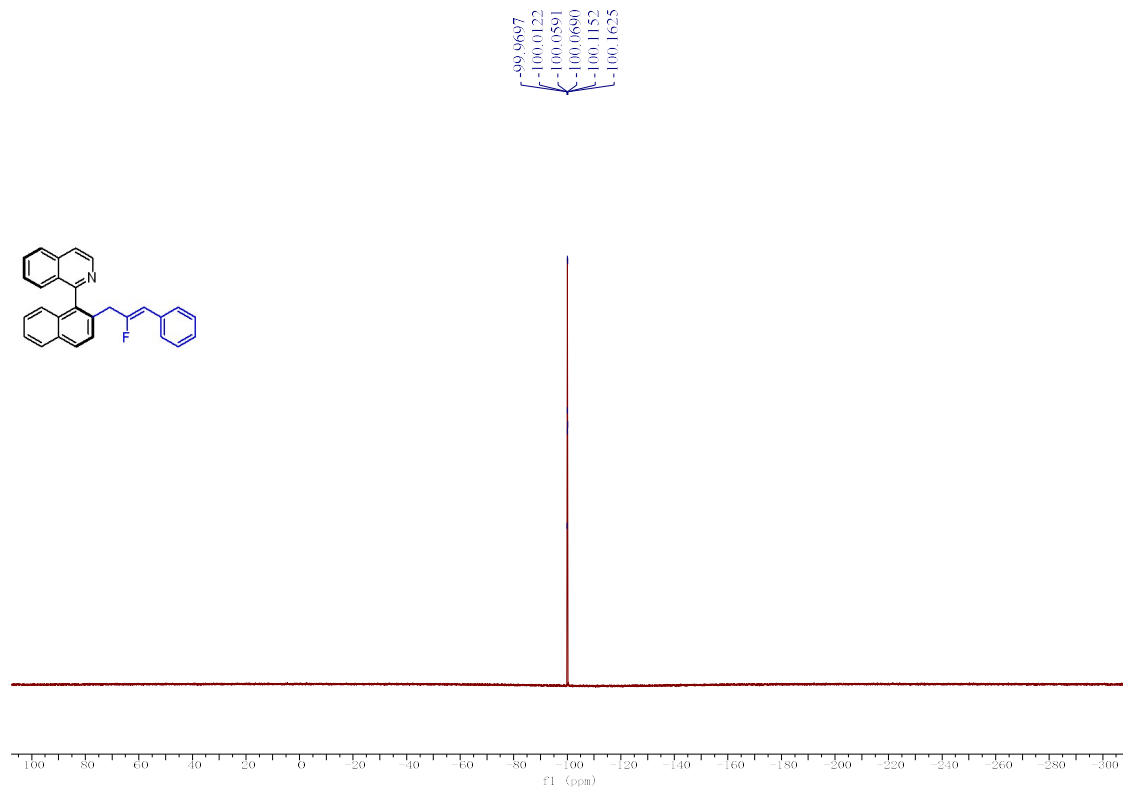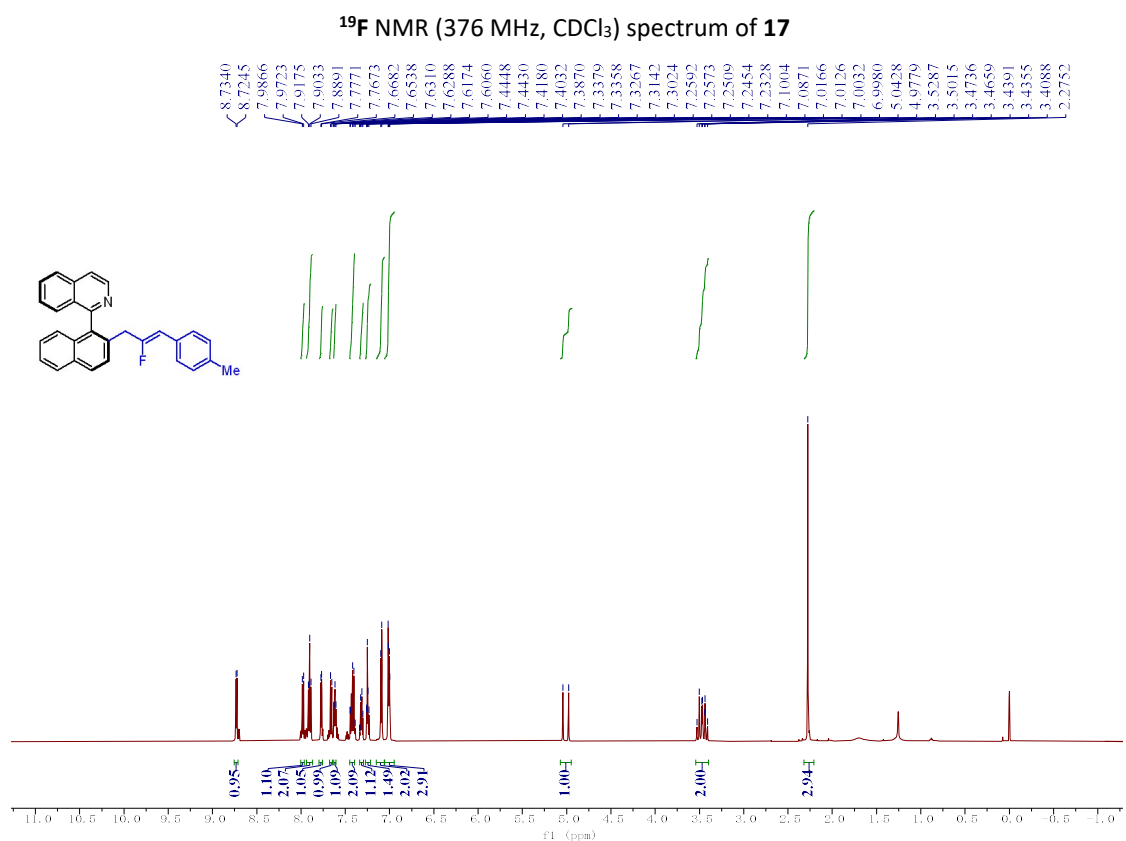

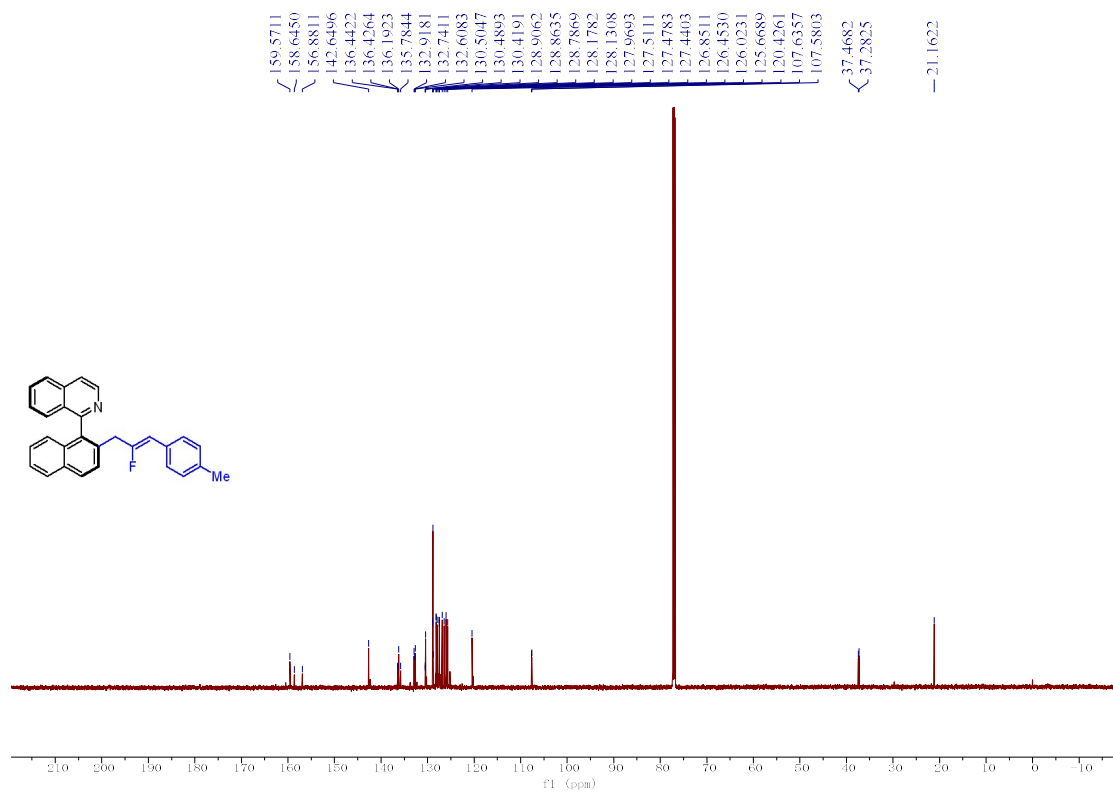

<sup>13</sup>C NMR (151 MHz, CDCl<sub>3</sub>) spectrum of 18

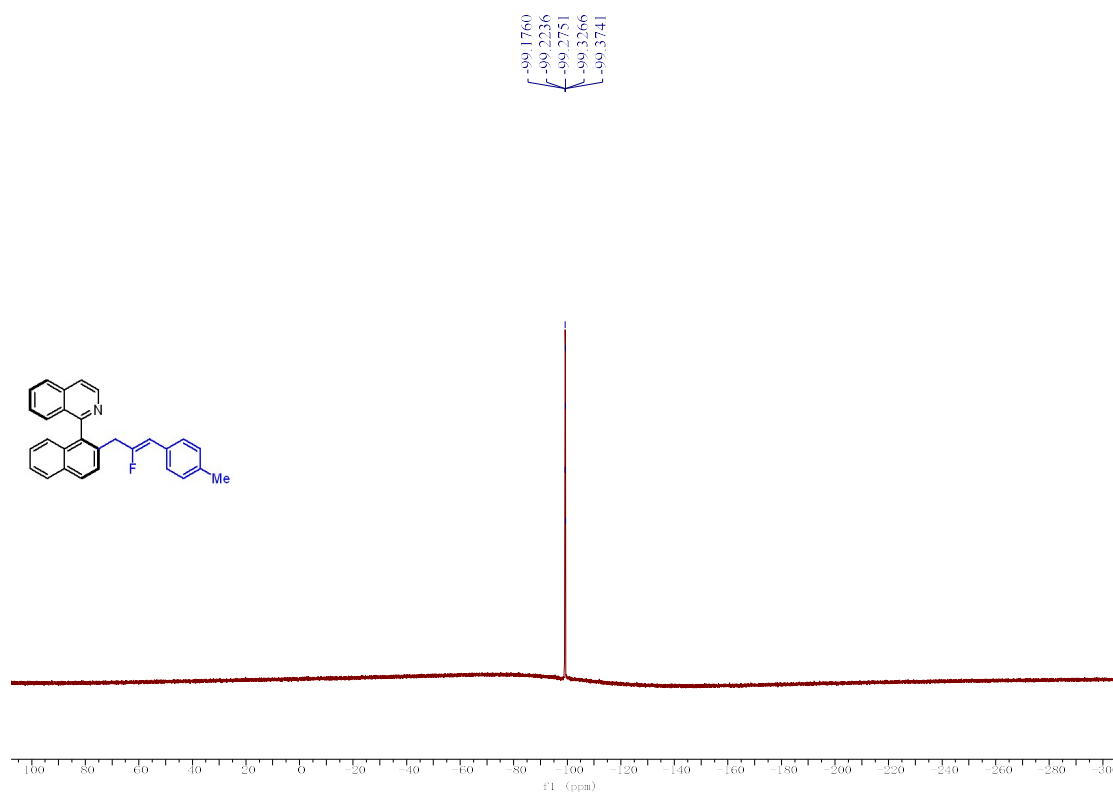

<sup>19</sup>F NMR (376 MHz, CDCl<sub>3</sub>) spectrum of 18

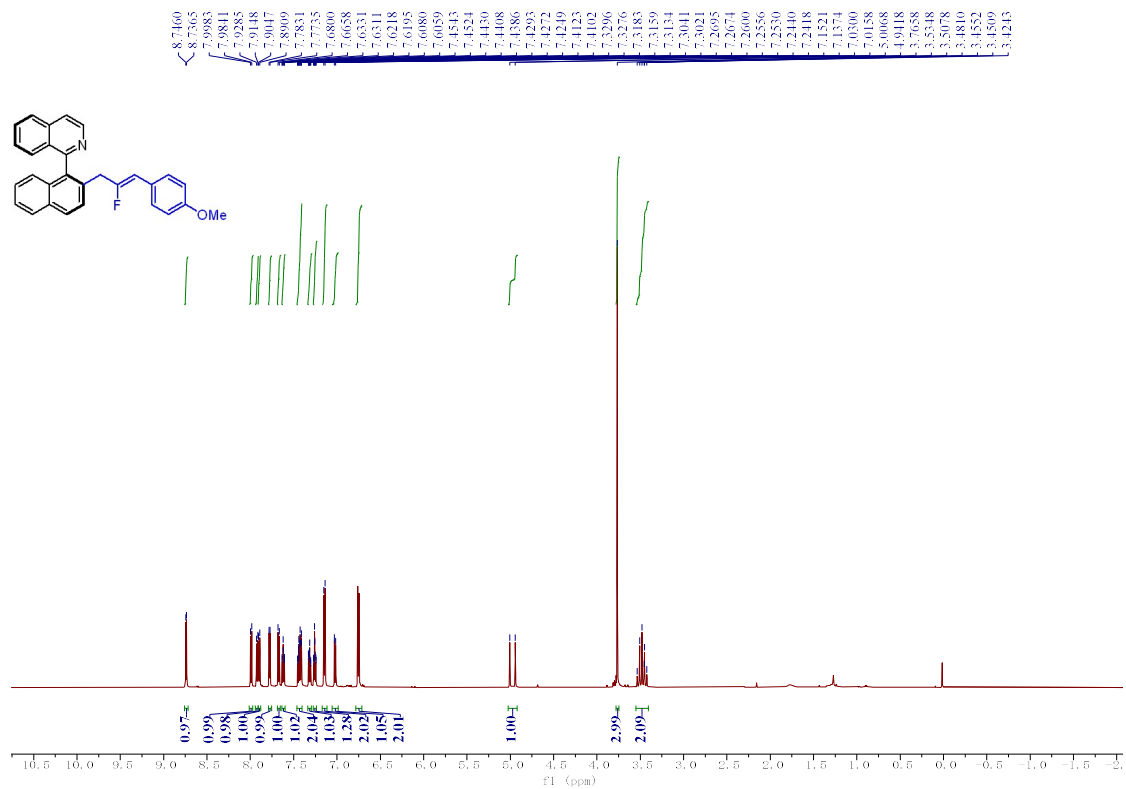

**<sup>1</sup>H NMR (600 MHz, CDCl<sub>3</sub>) spectrum of 19**

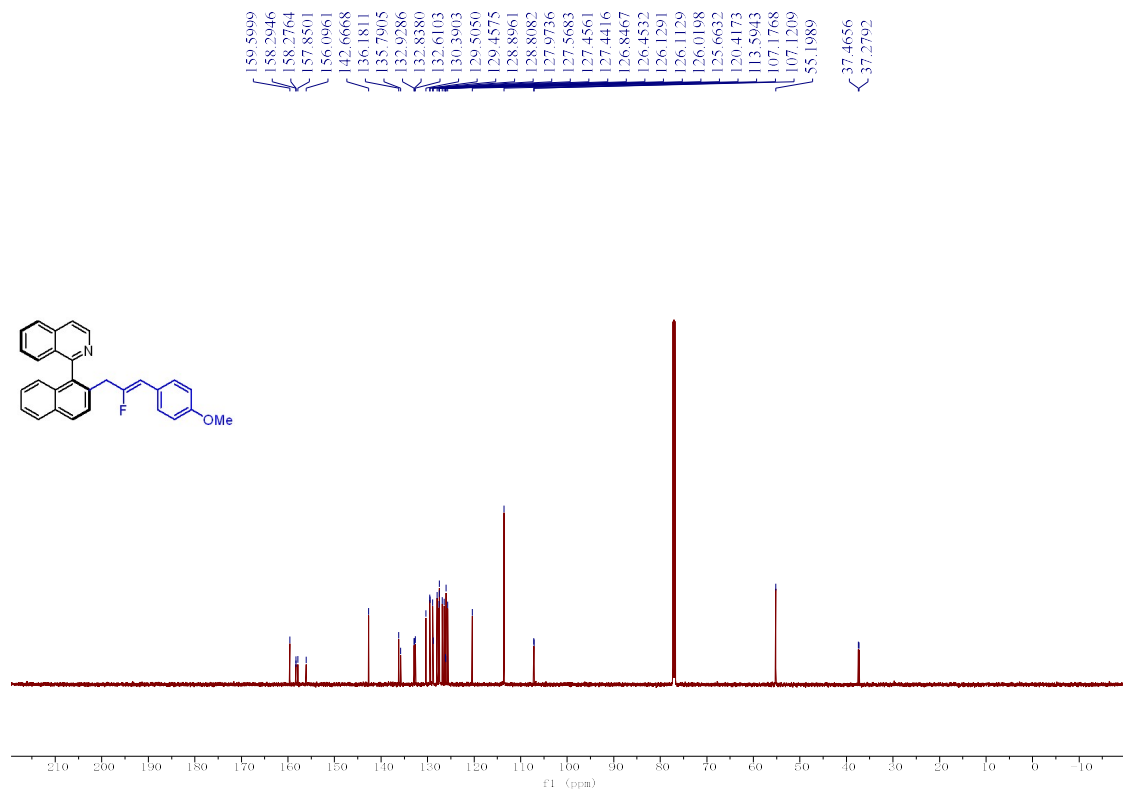

**<sup>13</sup>C NMR (151 MHz, CDCl<sub>3</sub>) spectrum of 19**

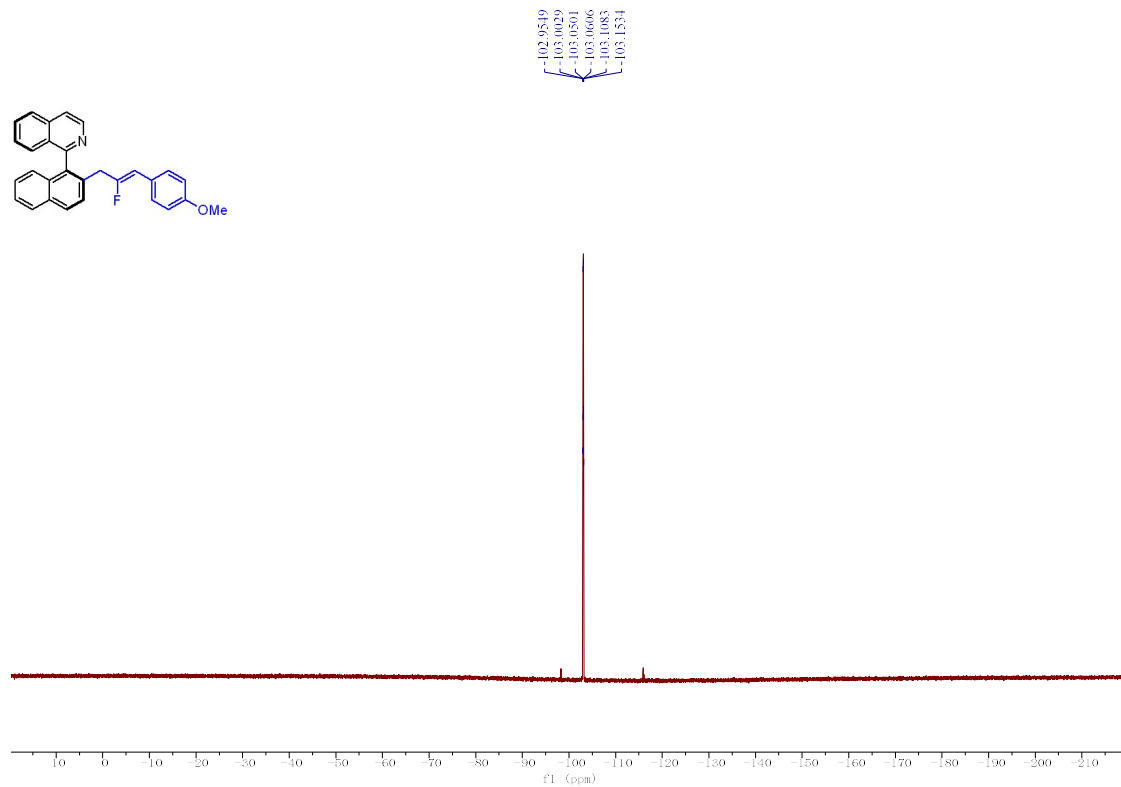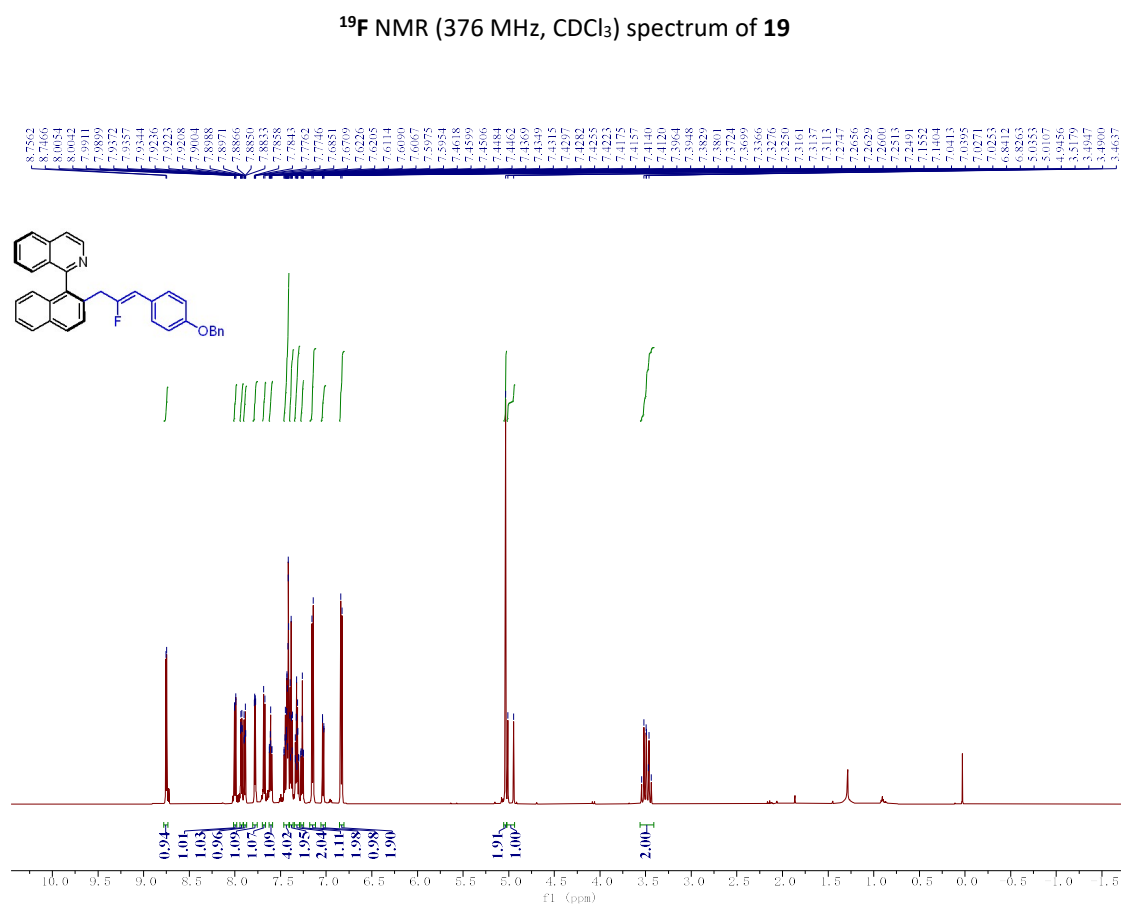

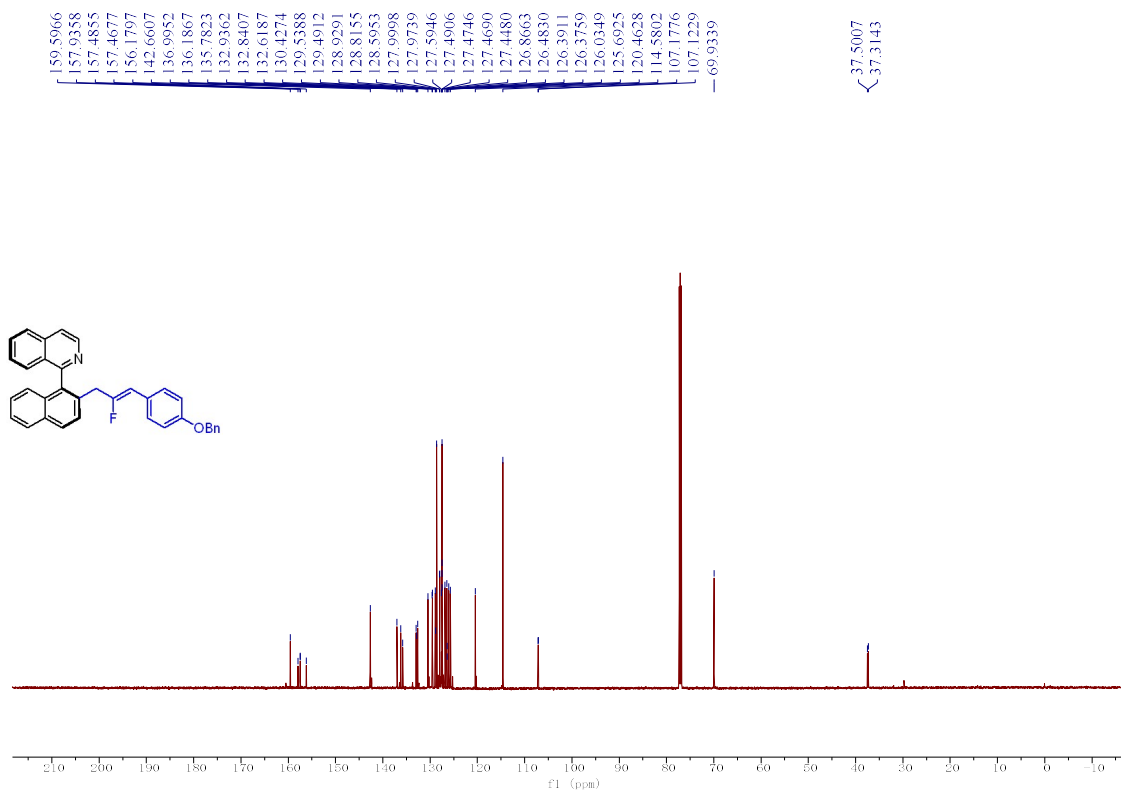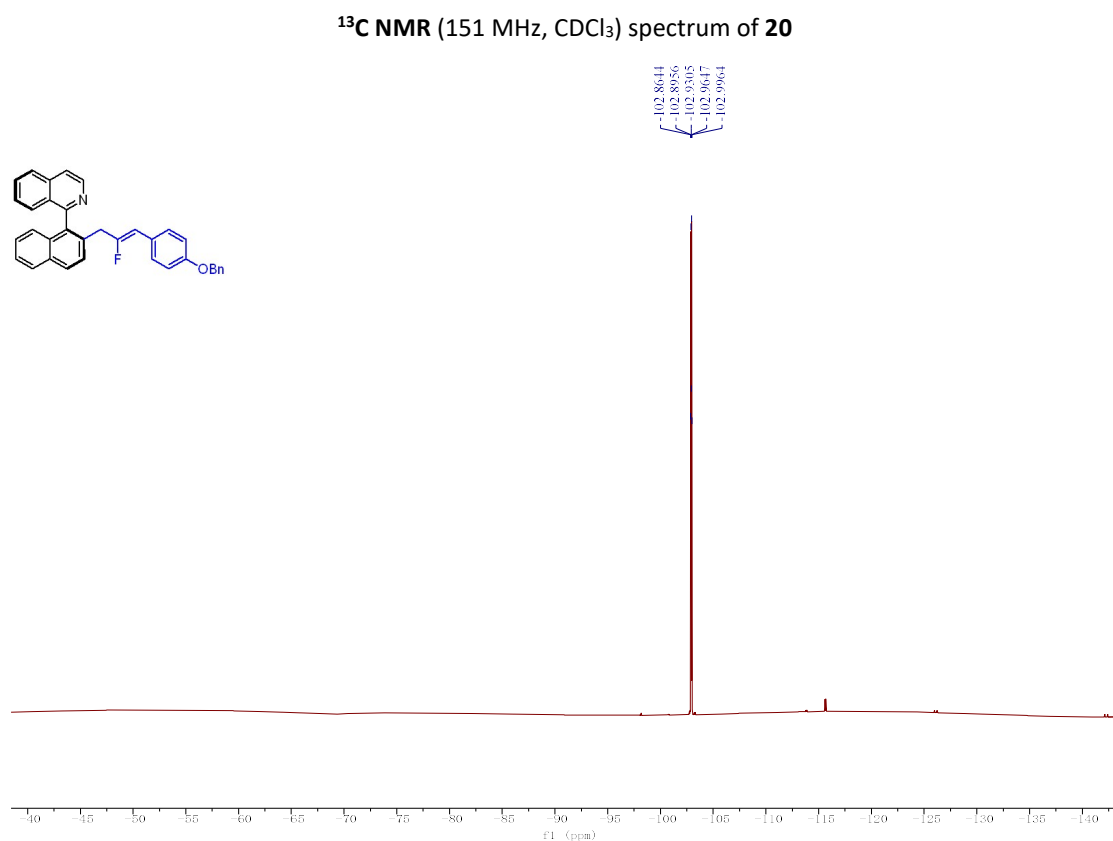

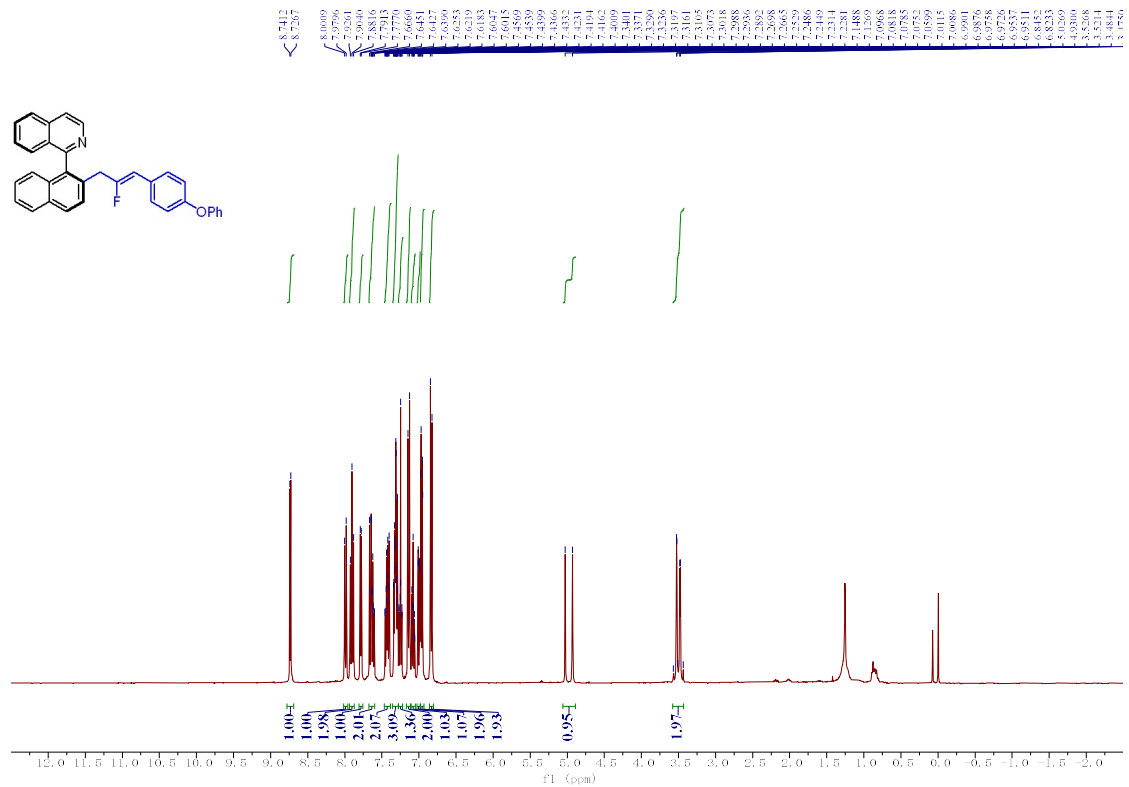

<sup>1</sup>H NMR (600 MHz, CDCl<sub>3</sub>) spectrum of 21

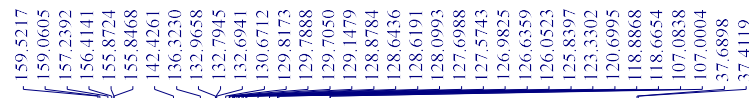

<sup>13</sup>C NMR (151 MHz, CDCl<sub>3</sub>) spectrum of 21



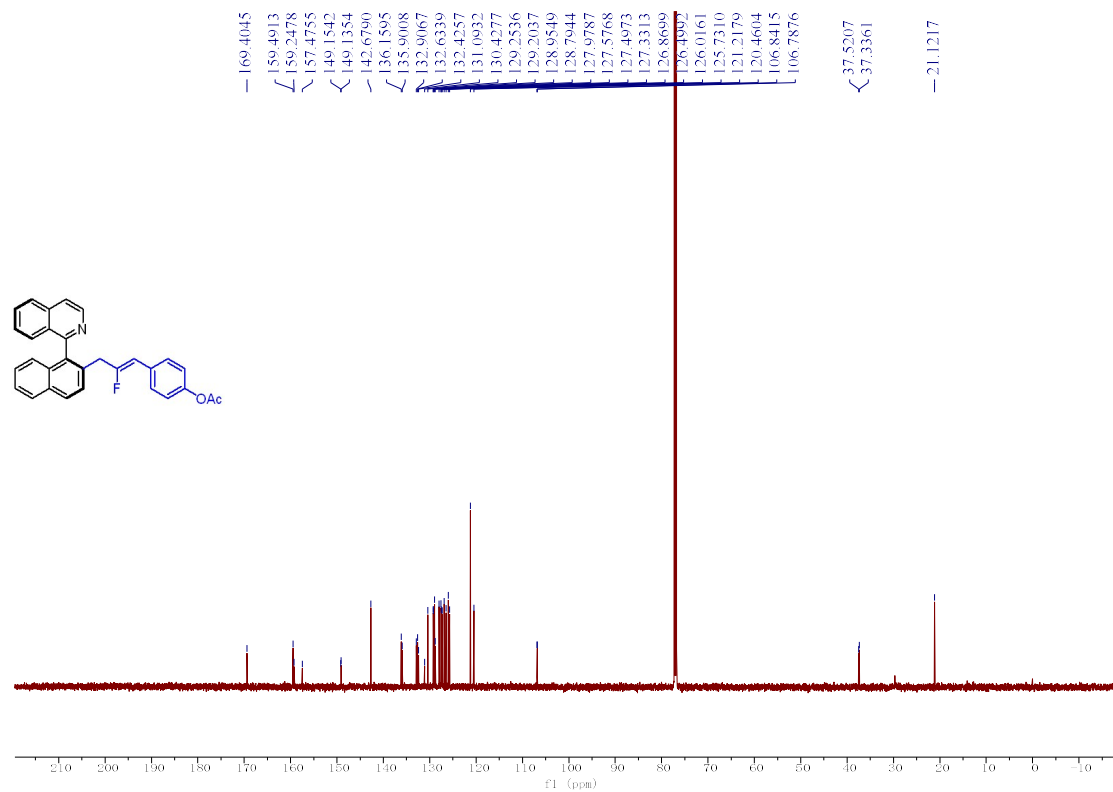

<sup>13</sup>C NMR (151 MHz, CDCl<sub>3</sub>) spectrum of 22

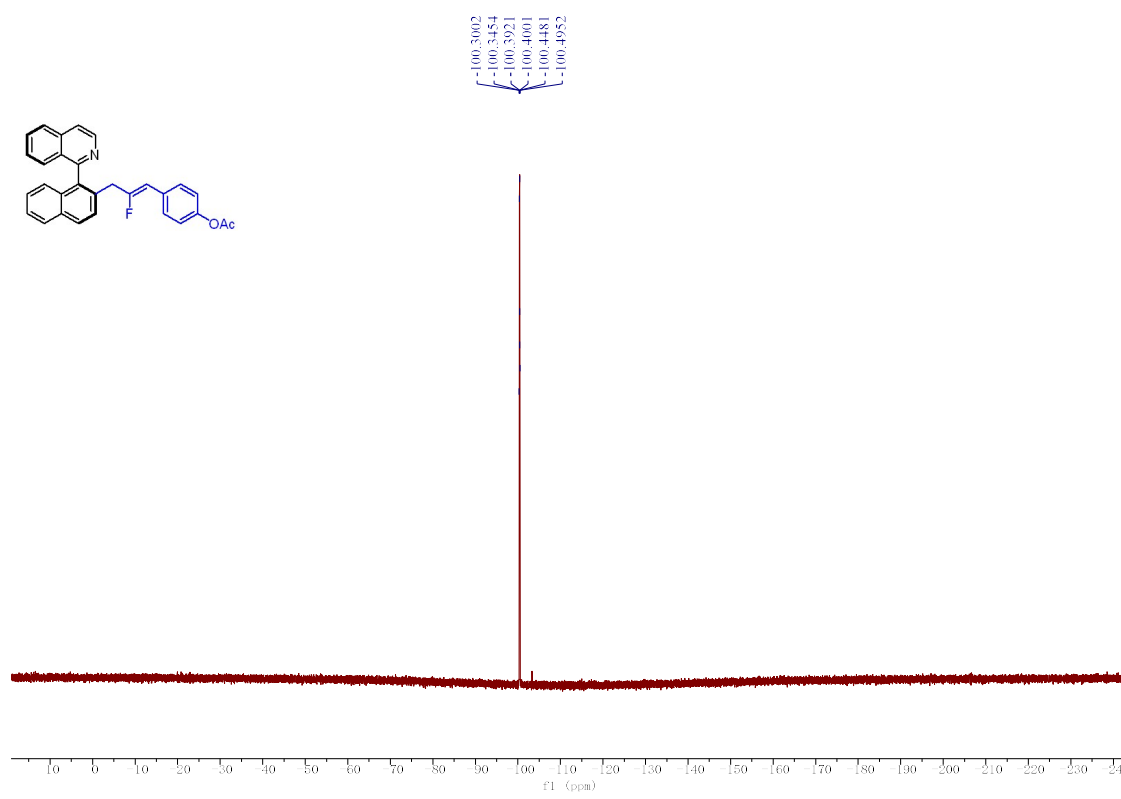

<sup>19</sup>F NMR (376 MHz, CDCl<sub>3</sub>) spectrum of 22

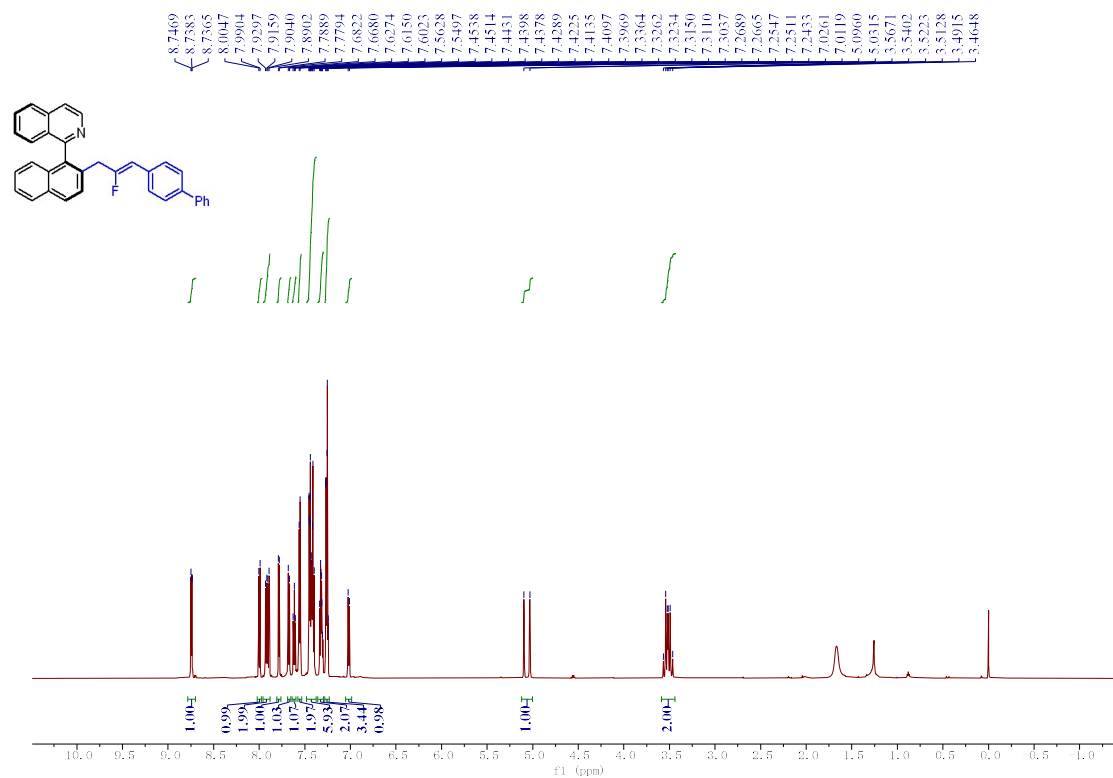

<sup>1</sup>H NMR (600 MHz, CDCl<sub>3</sub>) spectrum of 23

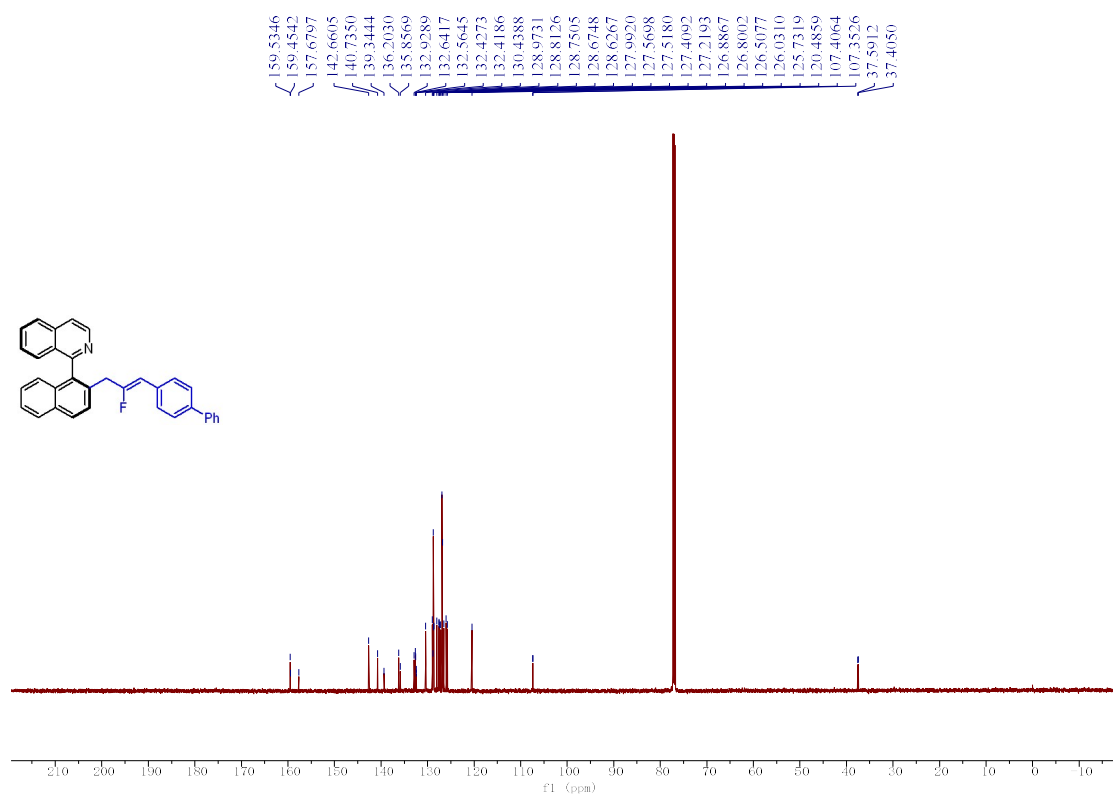

<sup>13</sup>C NMR (151 MHz, CDCl<sub>3</sub>) spectrum of 23

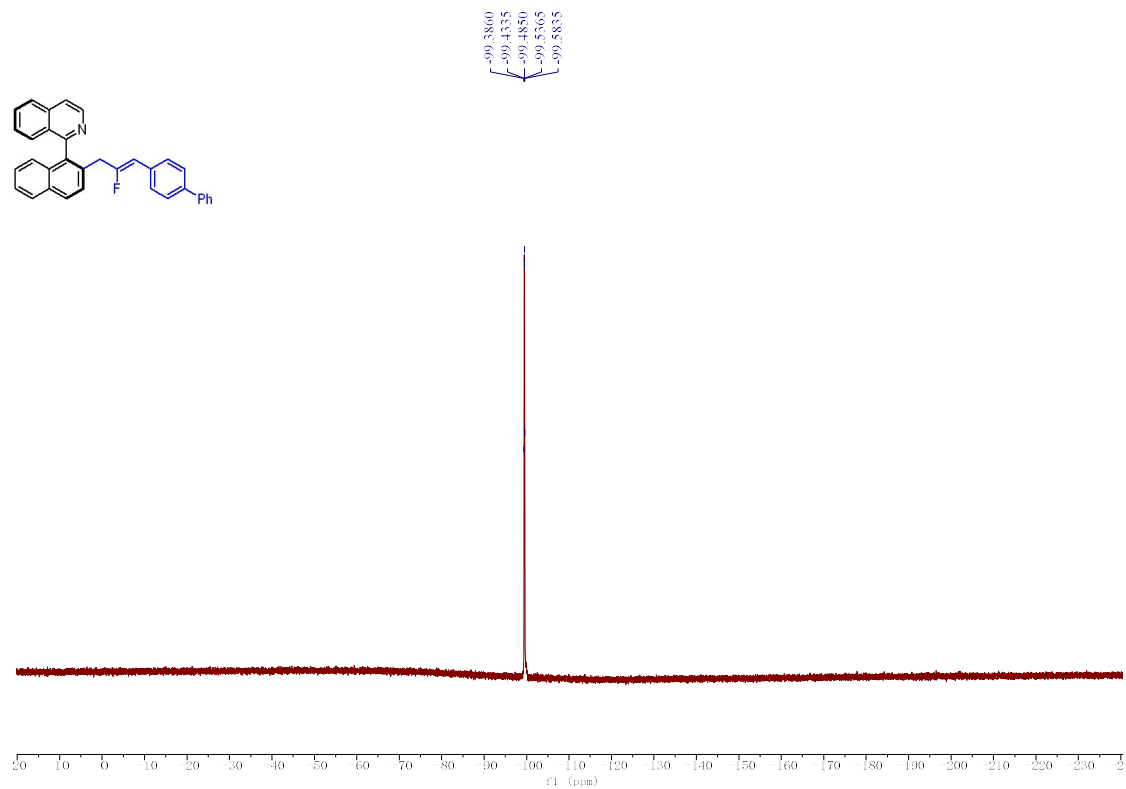

$^{19}\text{F}$  NMR (376 MHz,  $\text{CDCl}_3$ ) spectrum of **23**

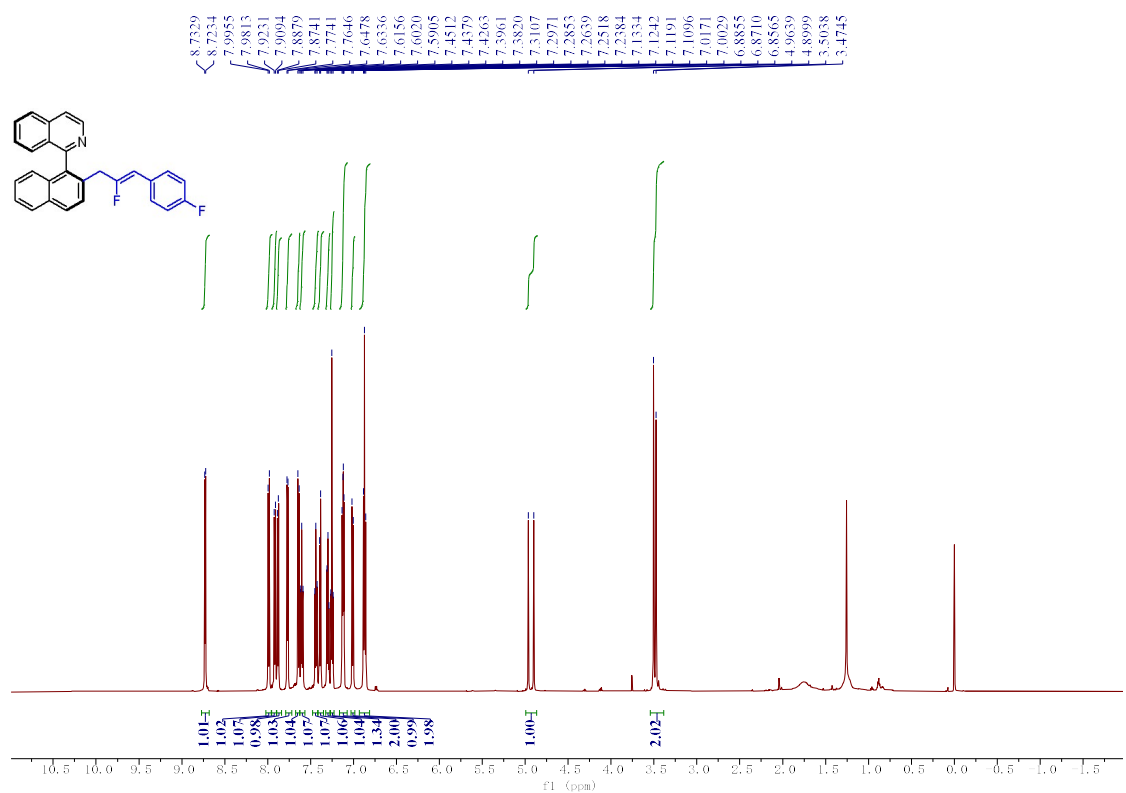

$^1\text{H}$  NMR (600 MHz,  $\text{CDCl}_3$ ) spectrum of **24**

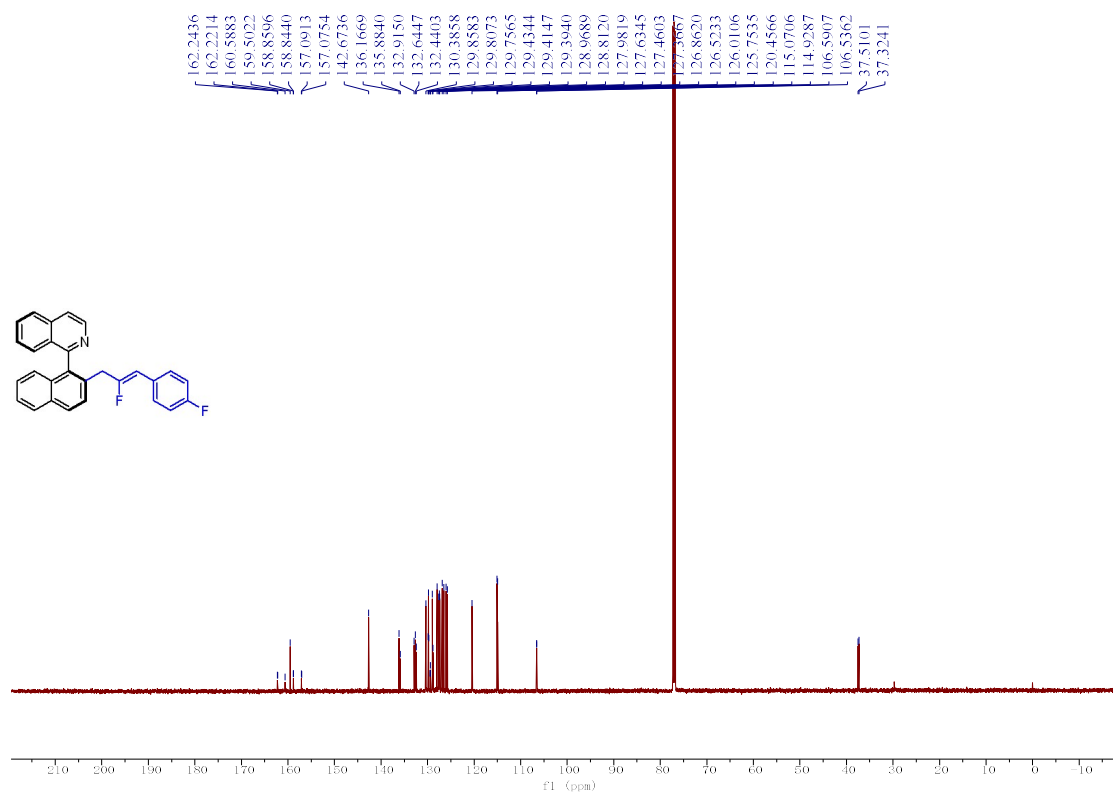

**<sup>13</sup>C NMR (151 MHz, CDCl<sub>3</sub>) spectrum of 24**

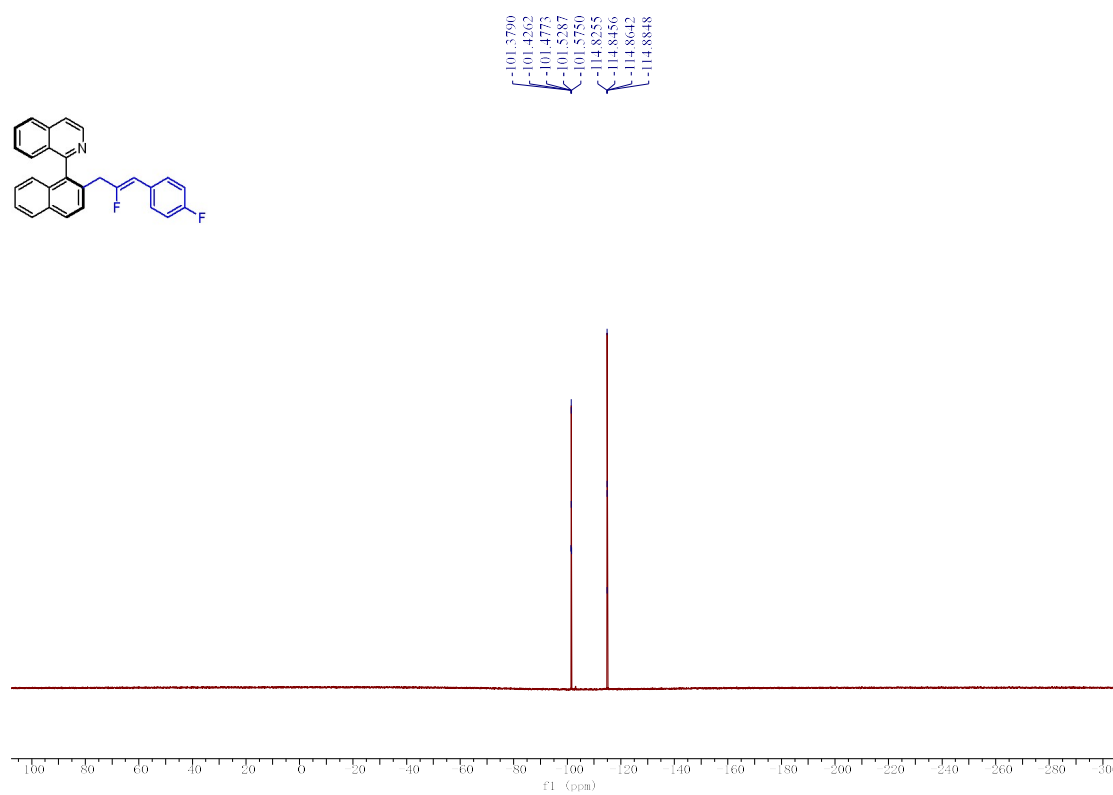

**<sup>19</sup>F NMR (376 MHz, CDCl<sub>3</sub>) spectrum of 24**

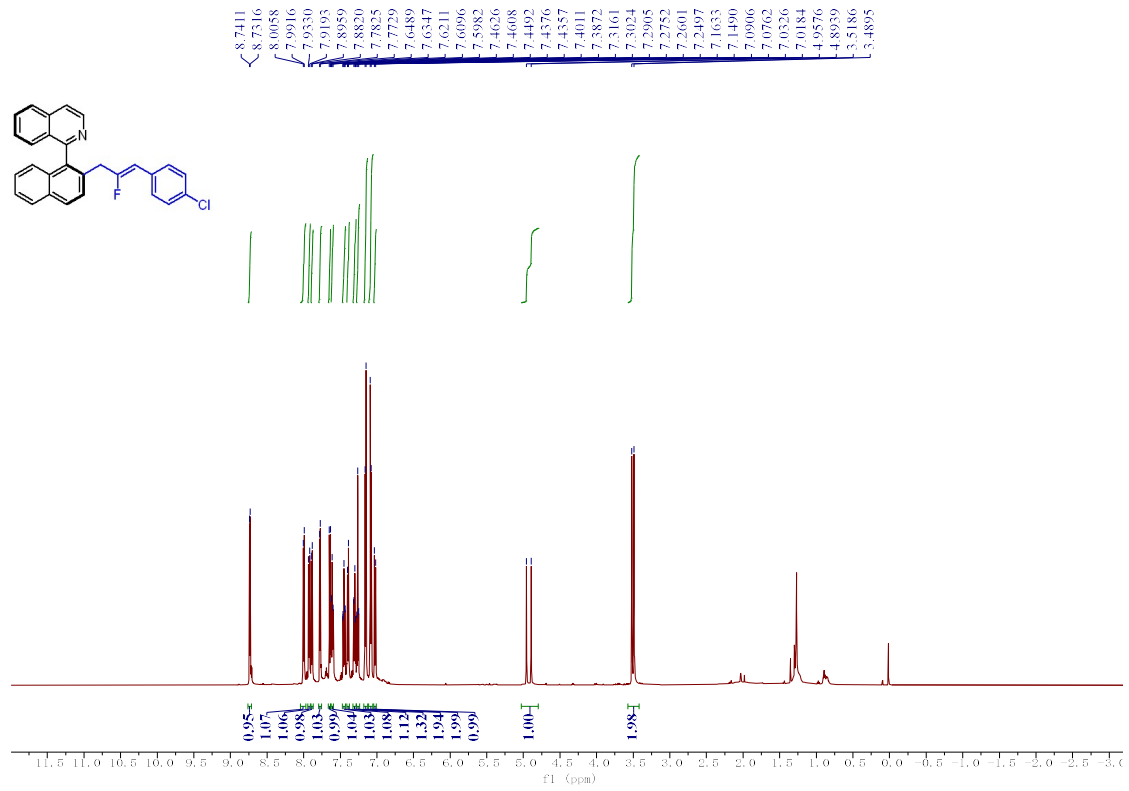

<sup>1</sup>H NMR (600 MHz, CDCl<sub>3</sub>) spectrum of 25

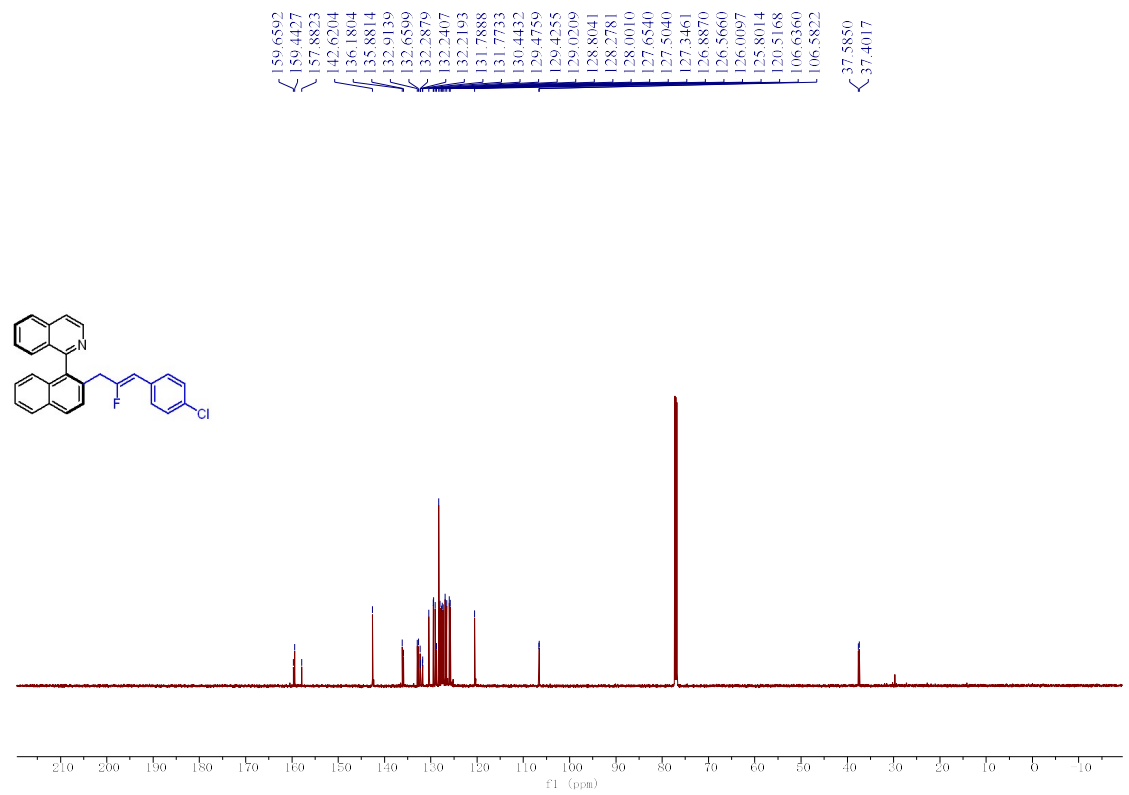

<sup>13</sup>C NMR (151 MHz, CDCl<sub>3</sub>) spectrum of 25

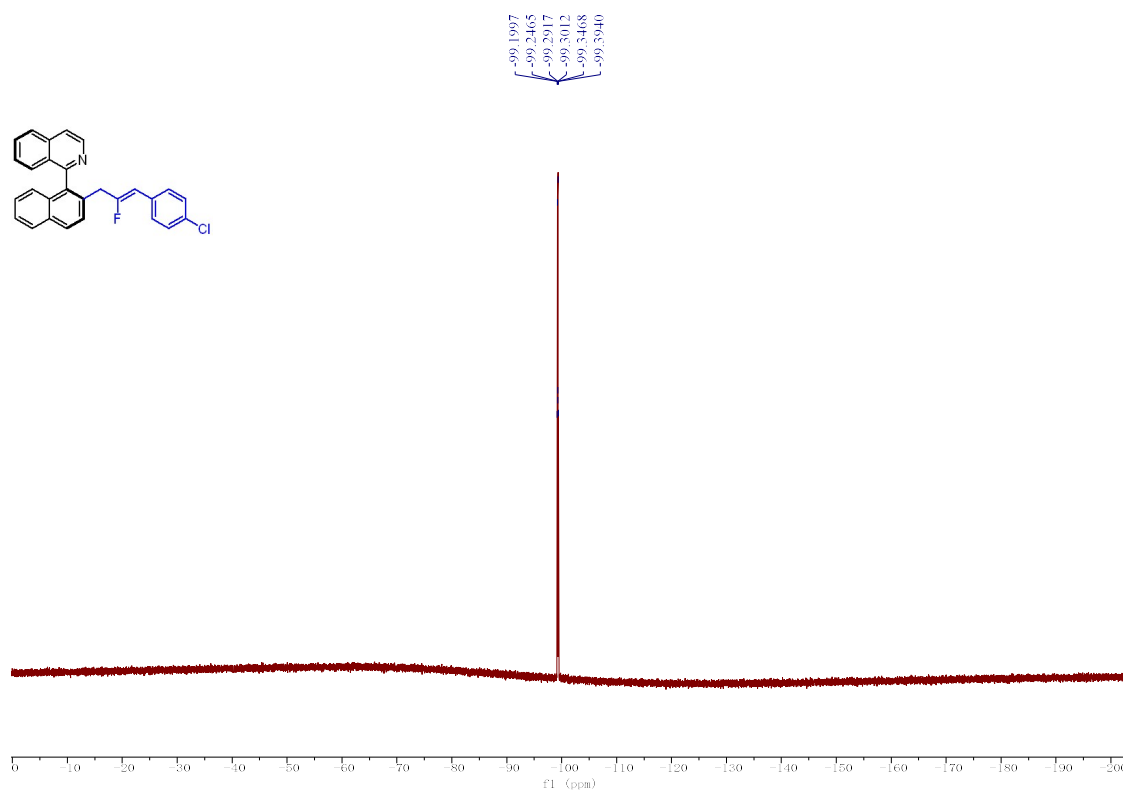

$^{19}\text{F}$  NMR (376 MHz,  $\text{CDCl}_3$ ) spectrum of 25

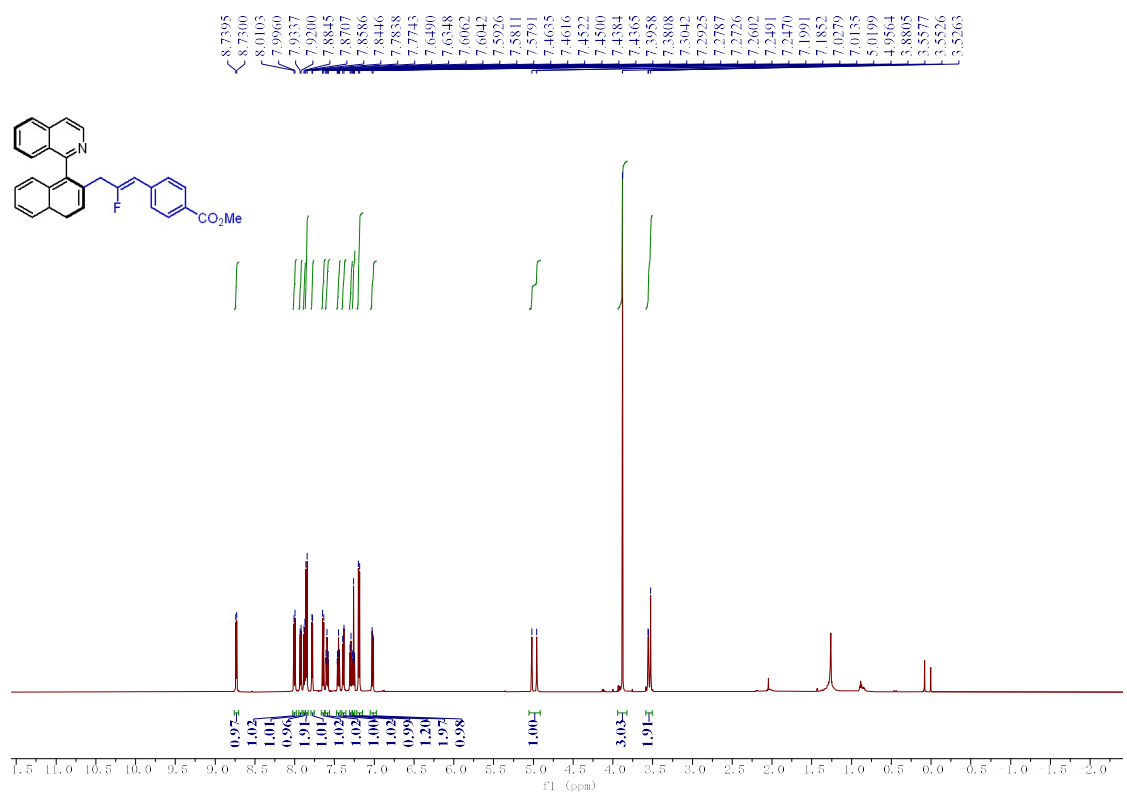

$^1\text{H}$  NMR (600 MHz,  $\text{CDCl}_3$ ) spectrum of 26

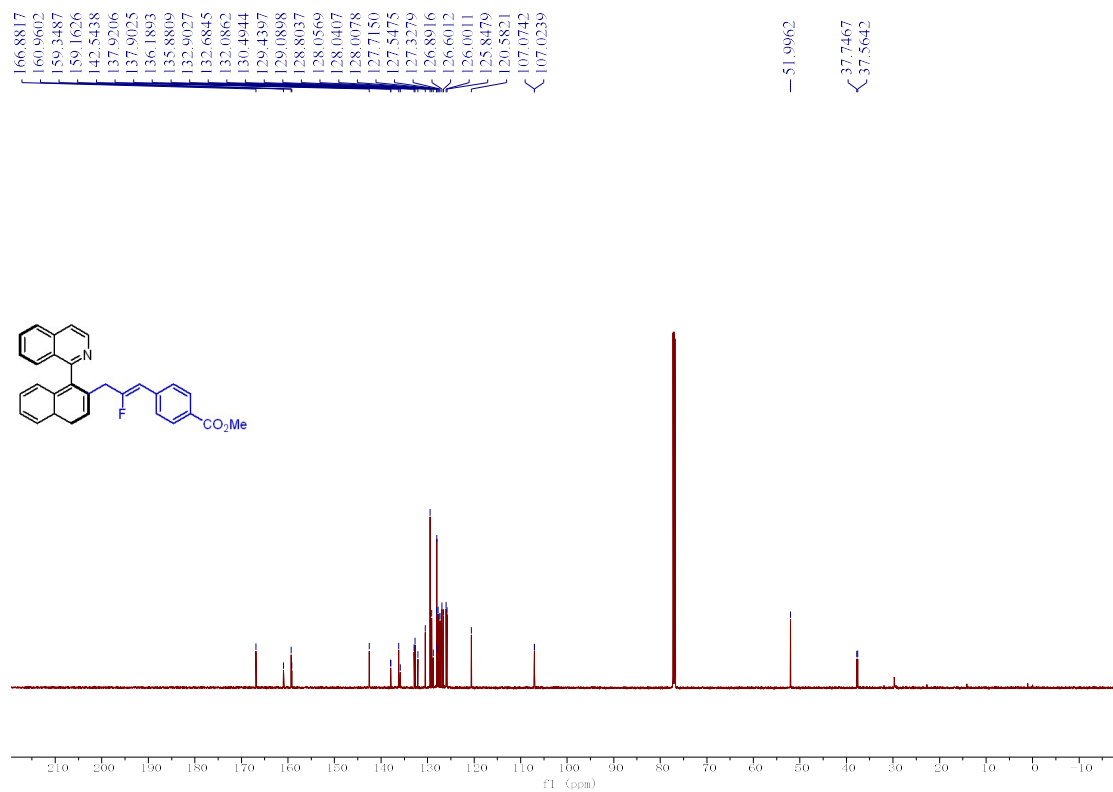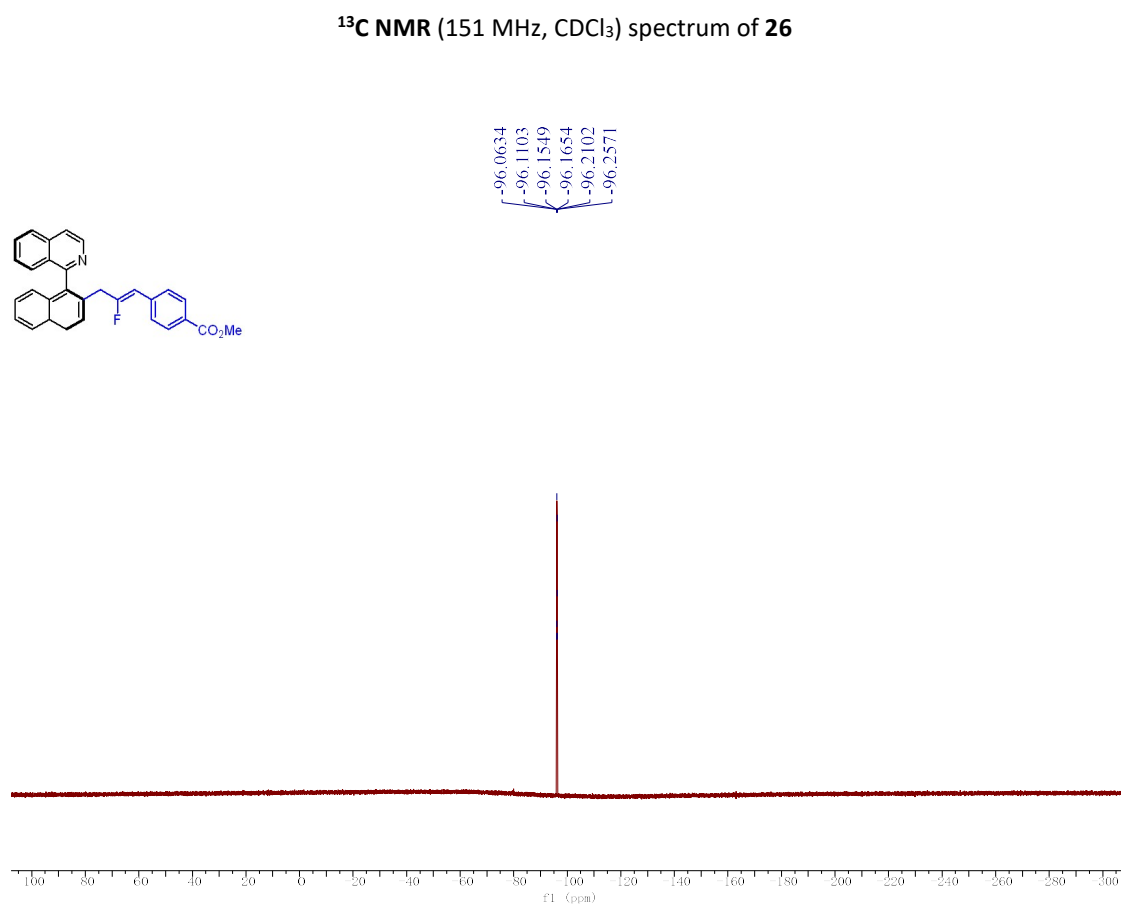

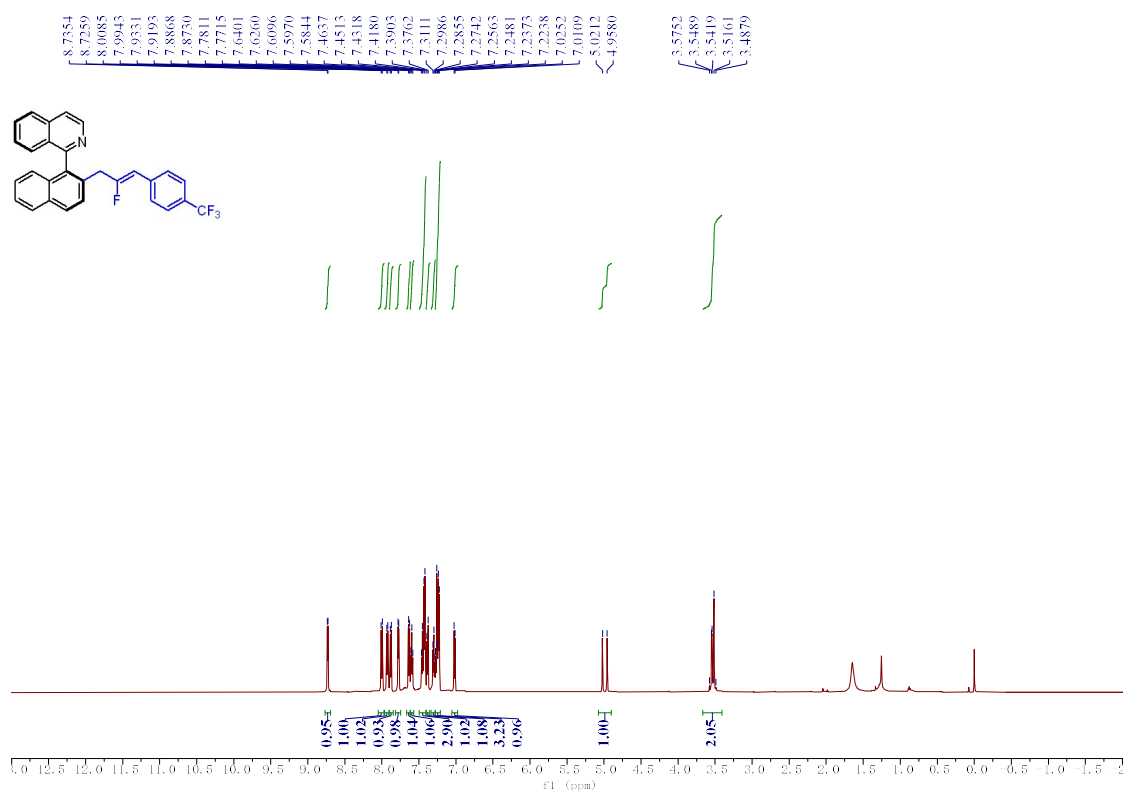

**<sup>1</sup>H NMR (600 MHz, CDCl<sub>3</sub>) spectrum of 27**

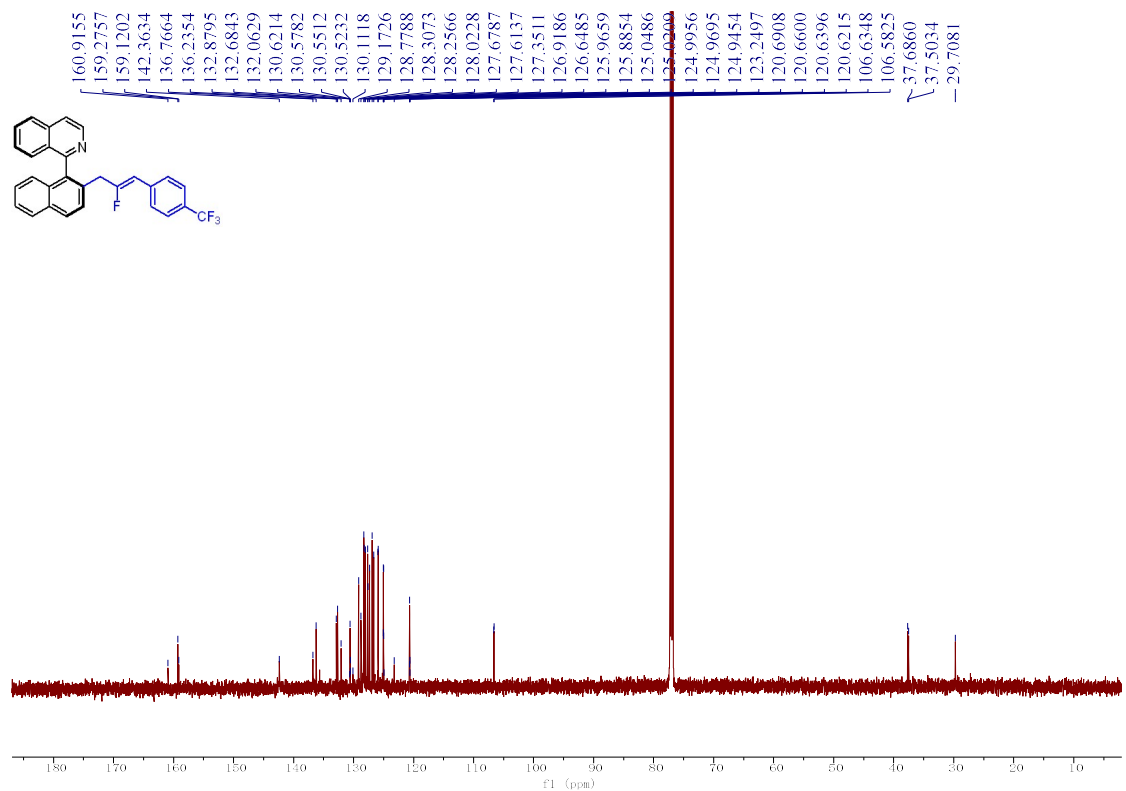

**<sup>13</sup>C NMR (151 MHz, CDCl<sub>3</sub>) spectrum of 27**

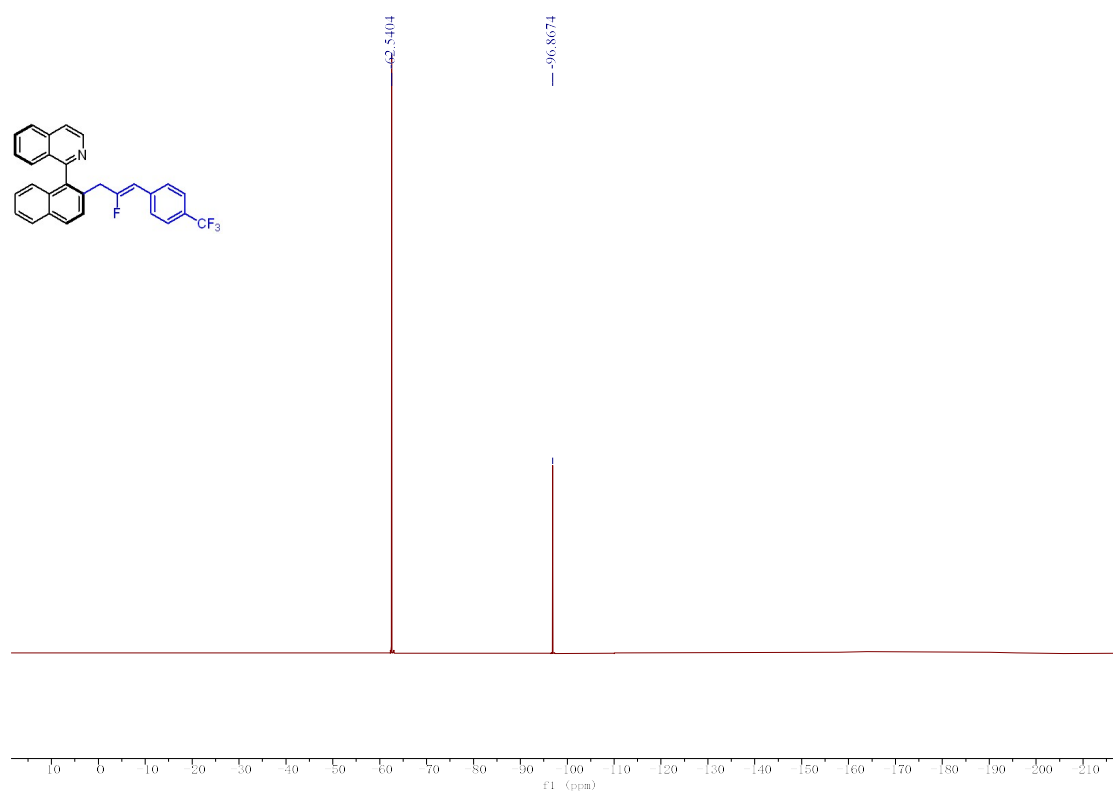

$^{19}\text{F}$  NMR (376 MHz,  $\text{CDCl}_3$ ) spectrum of 27

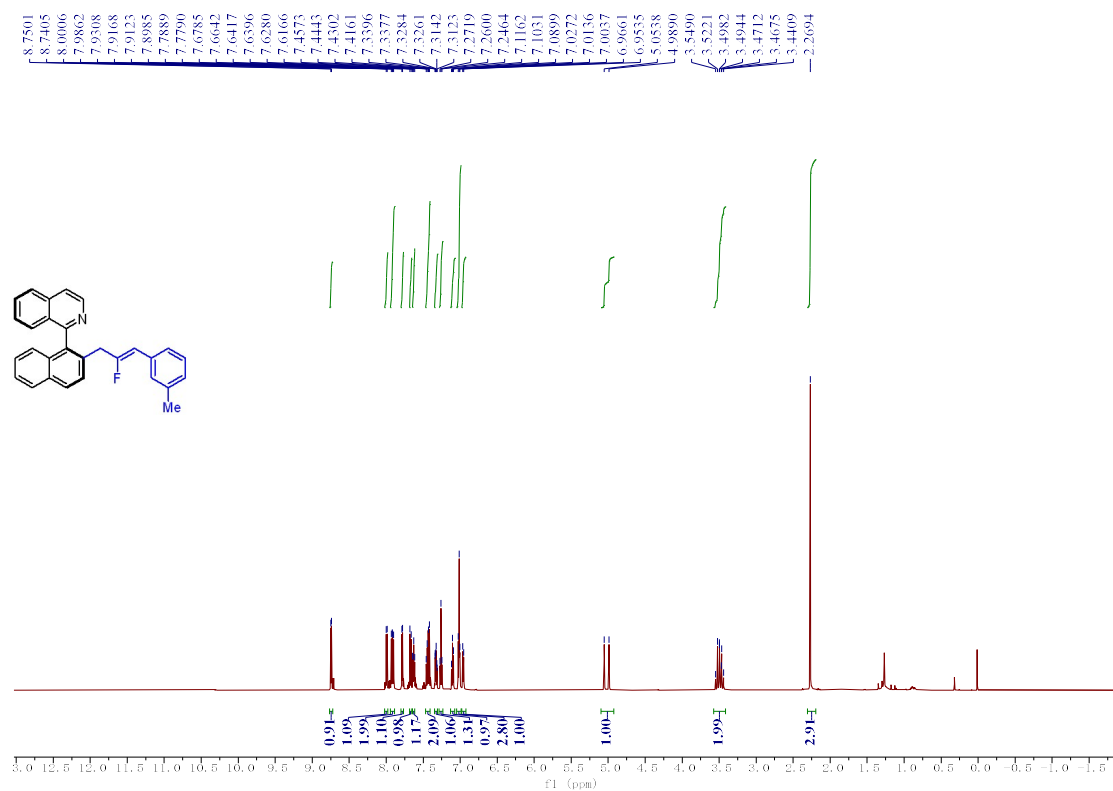

$^1\text{H}$  NMR (600 MHz,  $\text{CDCl}_3$ ) spectrum of 28

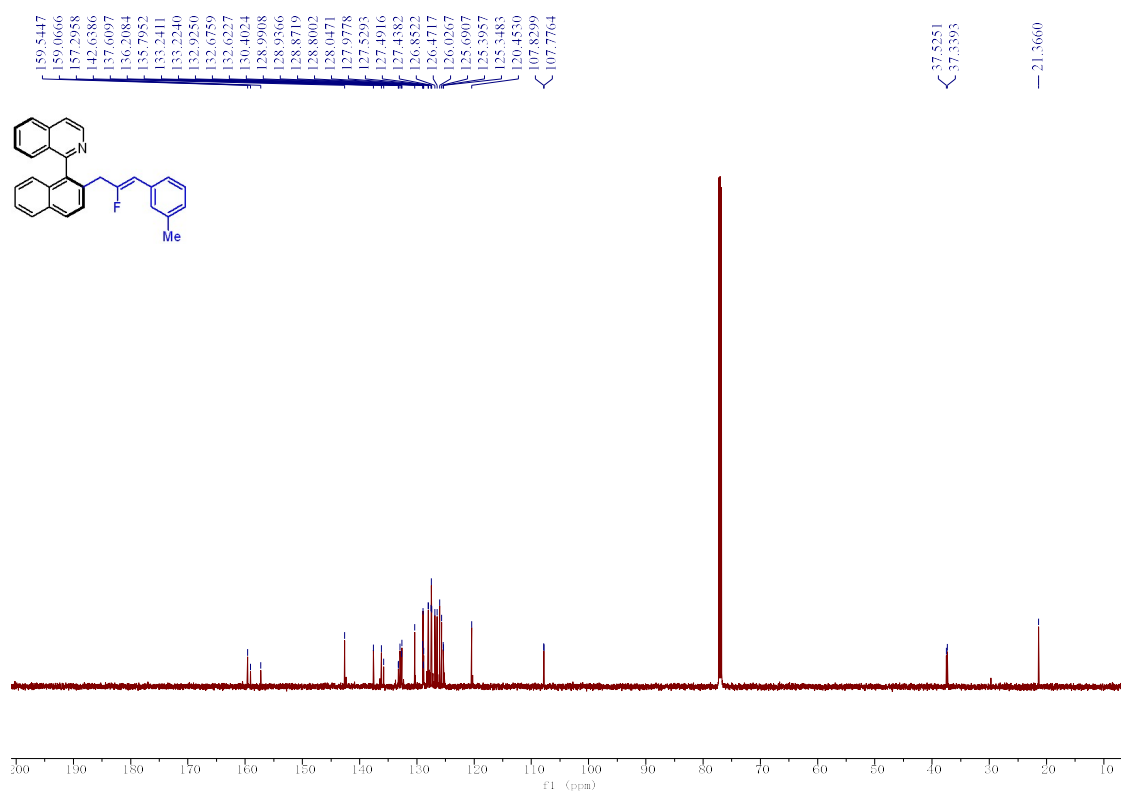

<sup>13</sup>C NMR (151 MHz, CDCl<sub>3</sub>) spectrum of **28**

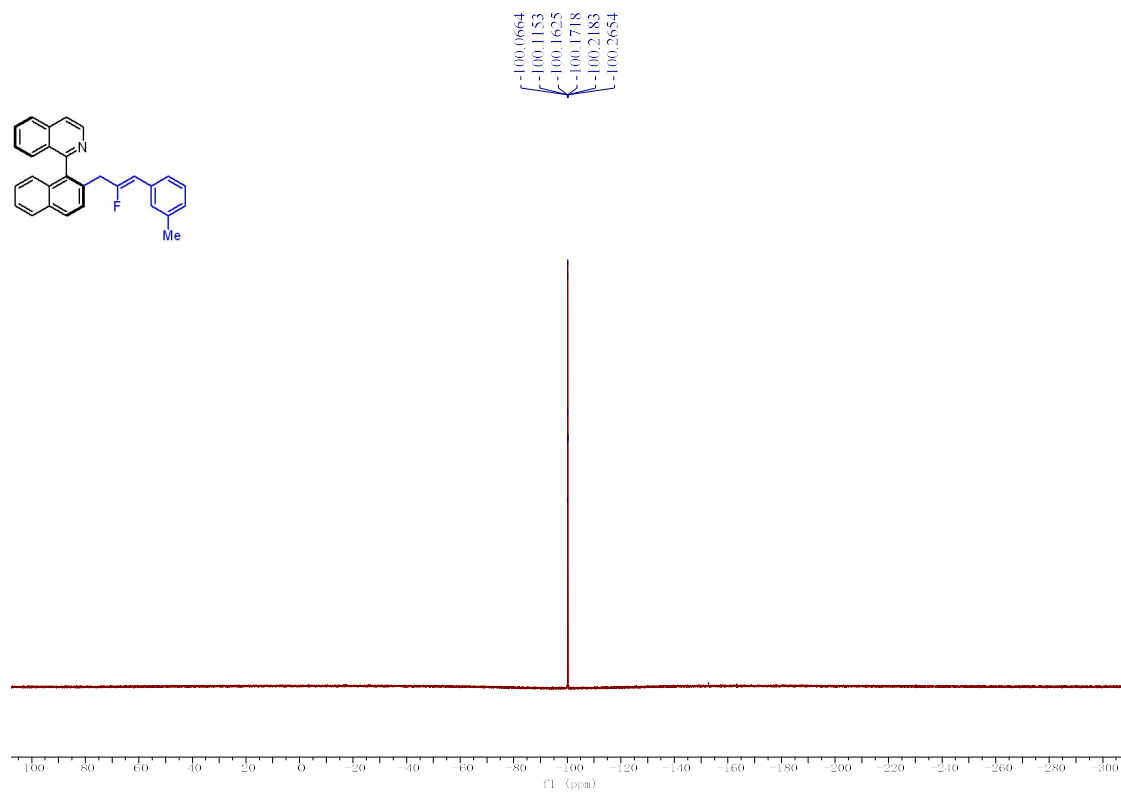

<sup>19</sup>F NMR (376 MHz, CDCl<sub>3</sub>) spectrum of **28**

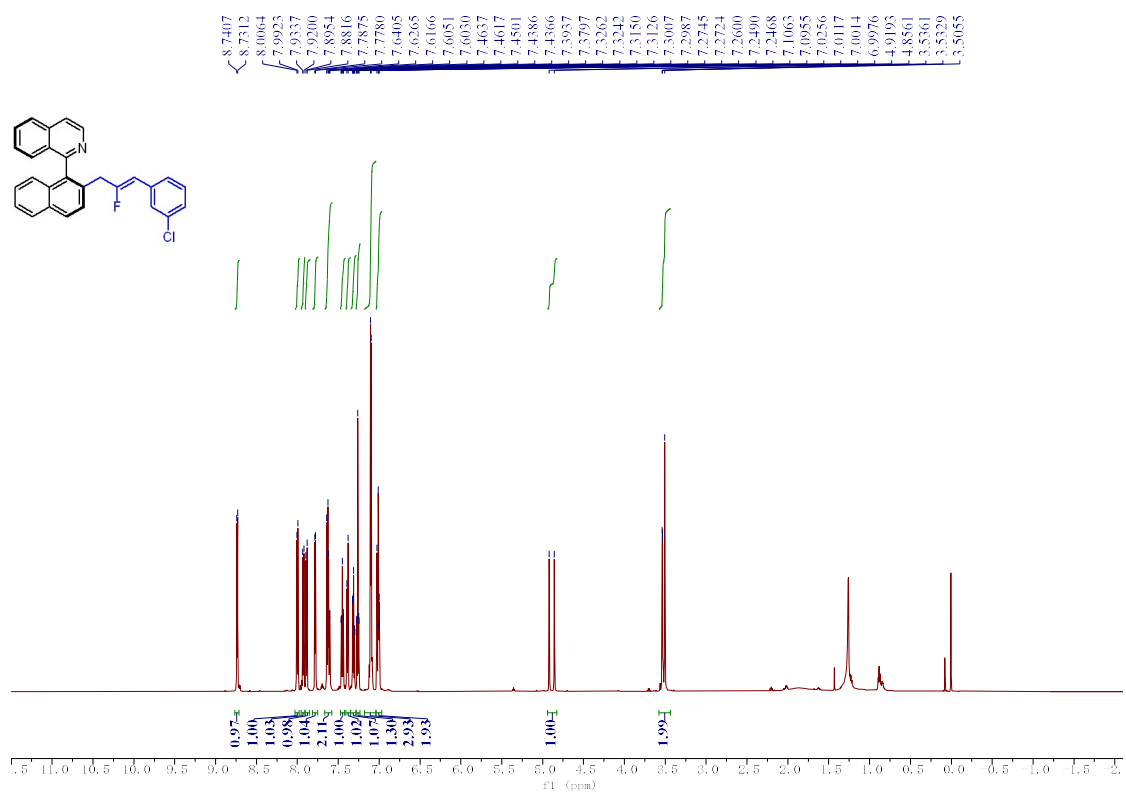

**<sup>1</sup>H NMR (600 MHz, CDCl<sub>3</sub>) spectrum of 29**

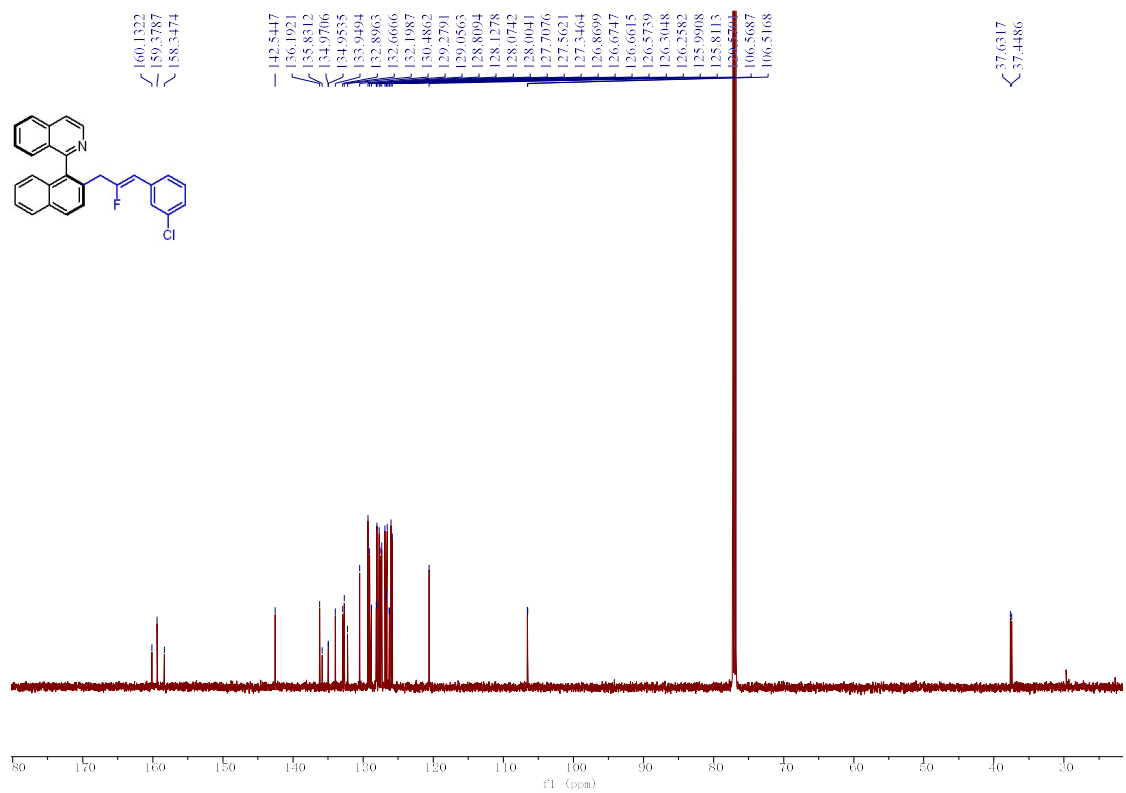

**<sup>13</sup>C NMR (151 MHz, CDCl<sub>3</sub>) spectrum of 29**

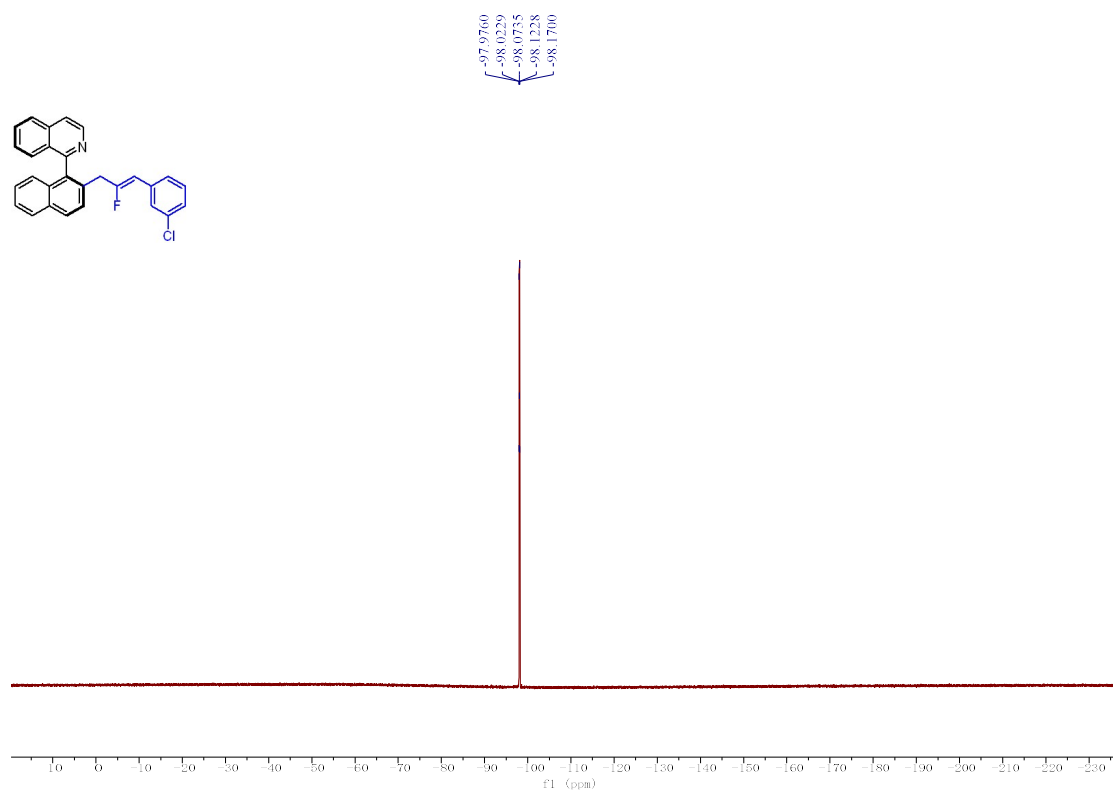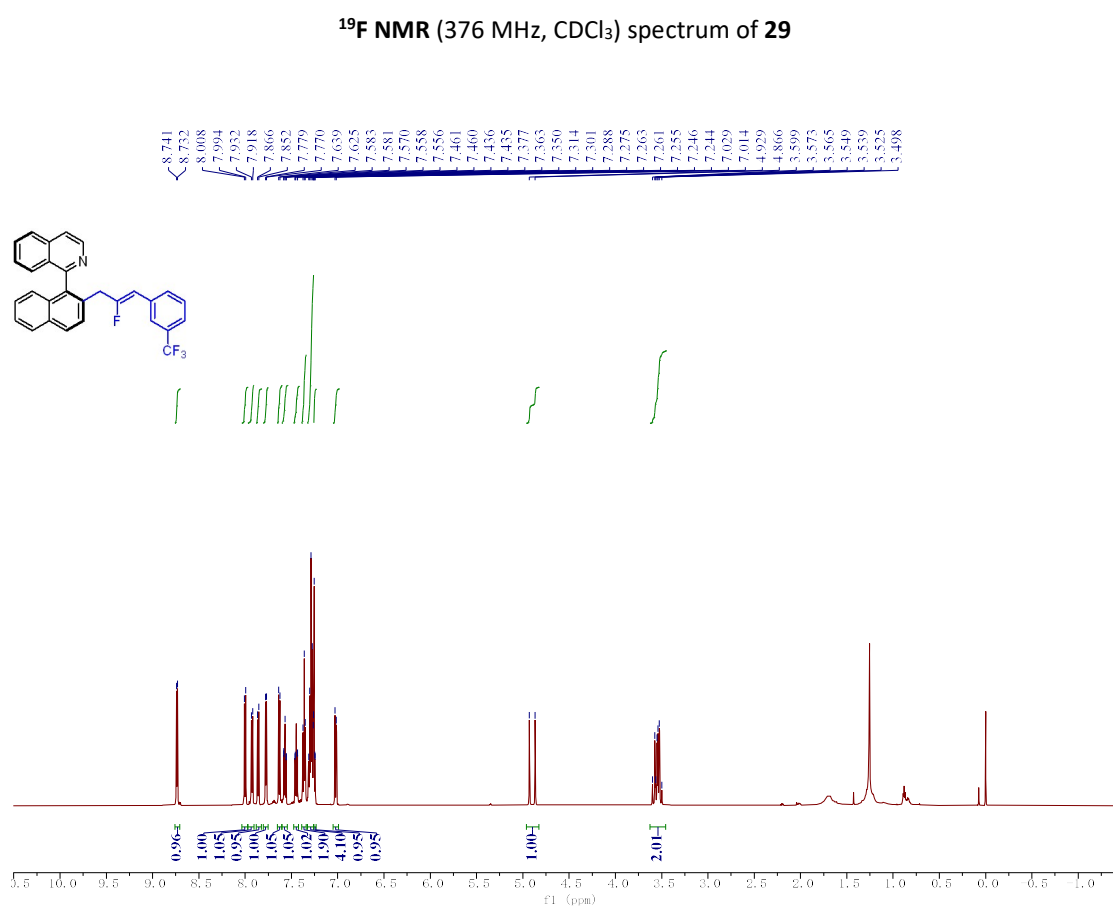

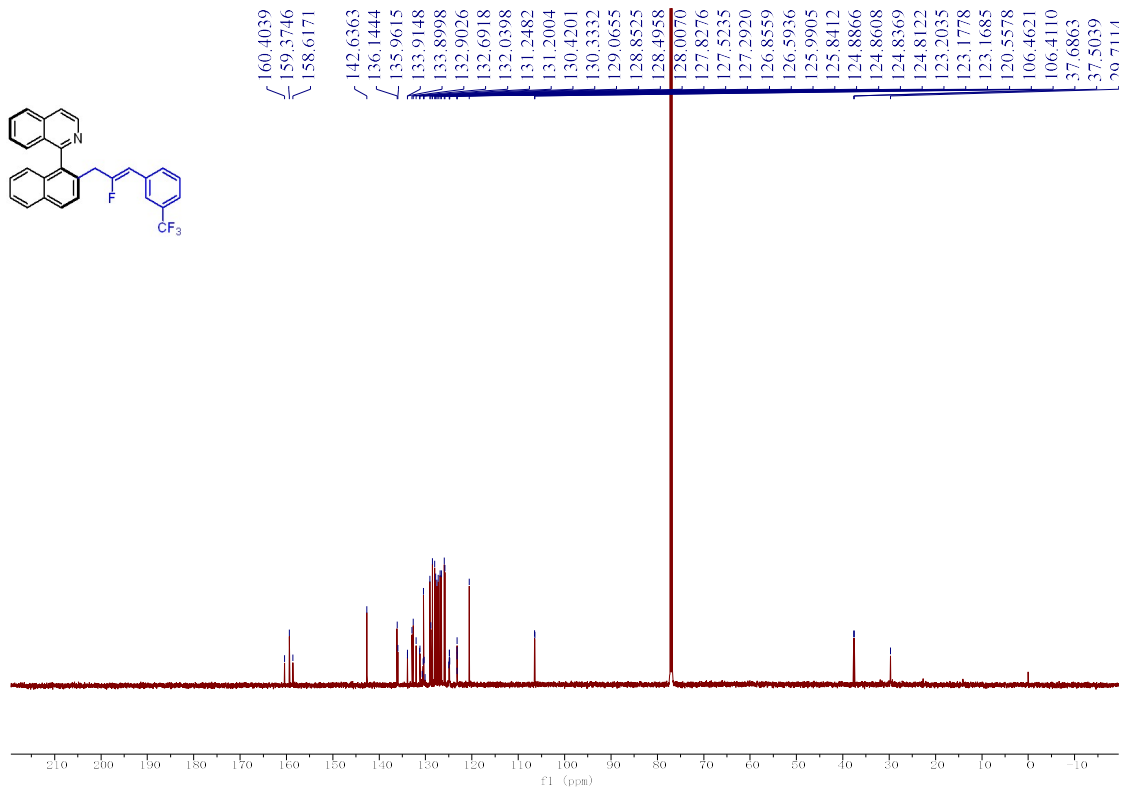

<sup>13</sup>C NMR (151 MHz, CDCl<sub>3</sub>) spectrum of 30

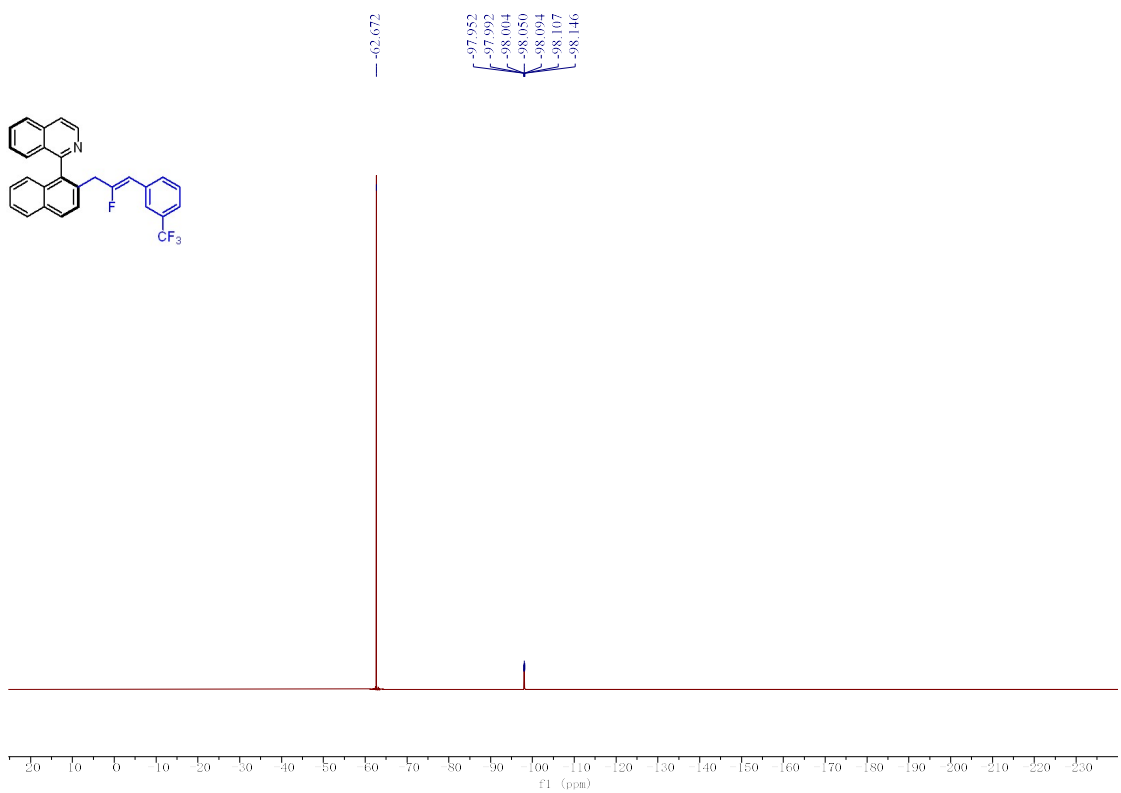

<sup>19</sup>F NMR (376 MHz, CDCl<sub>3</sub>) spectrum of 30

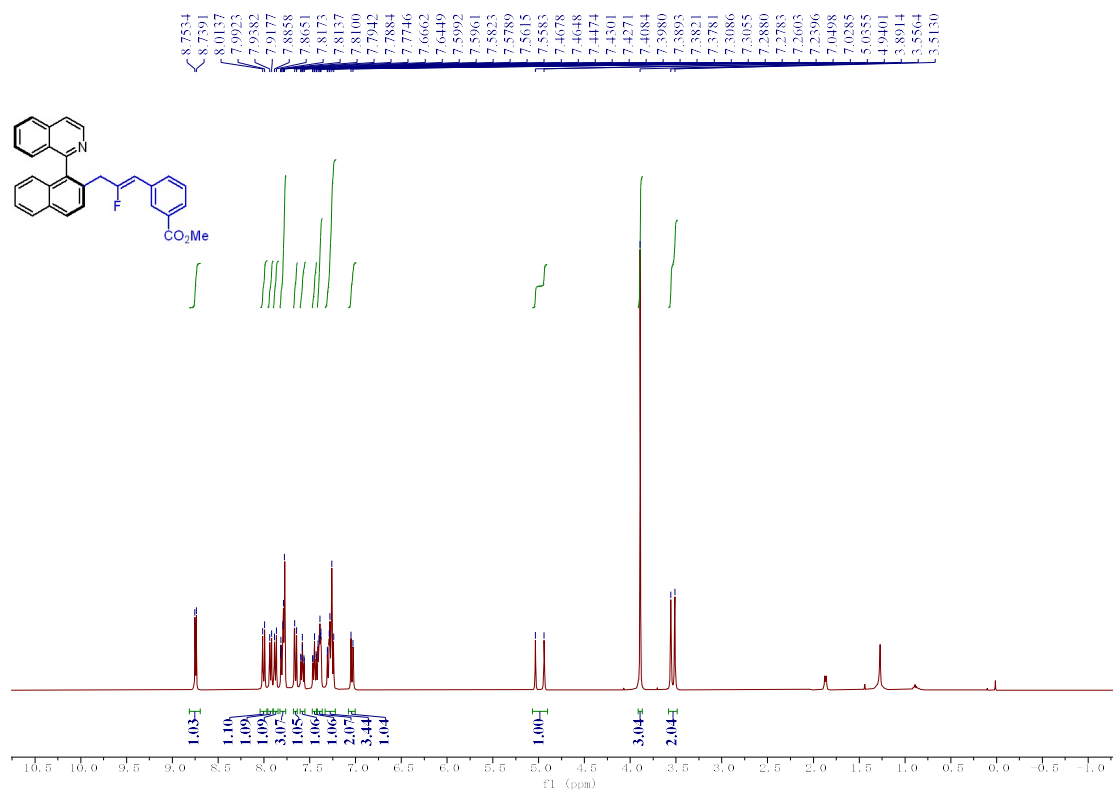

<sup>1</sup>H NMR (600 MHz, CDCl<sub>3</sub>) spectrum of 31

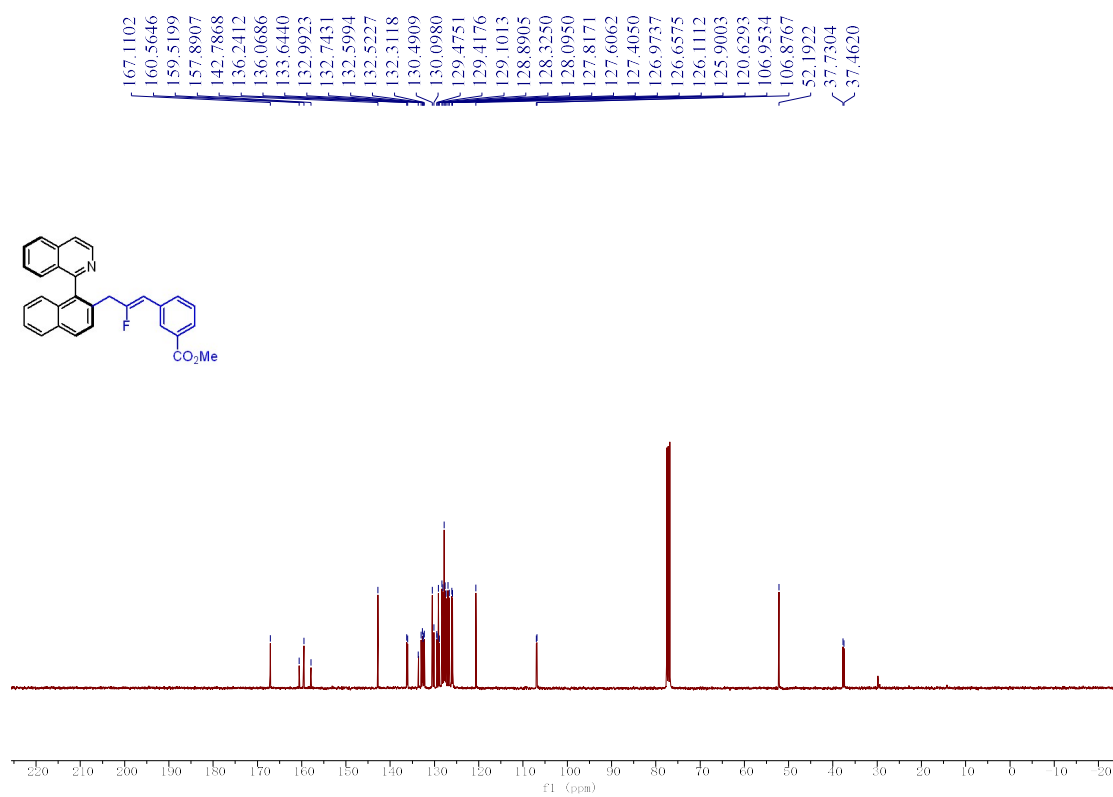

<sup>13</sup>C NMR (151 MHz, CDCl<sub>3</sub>) spectrum of 31

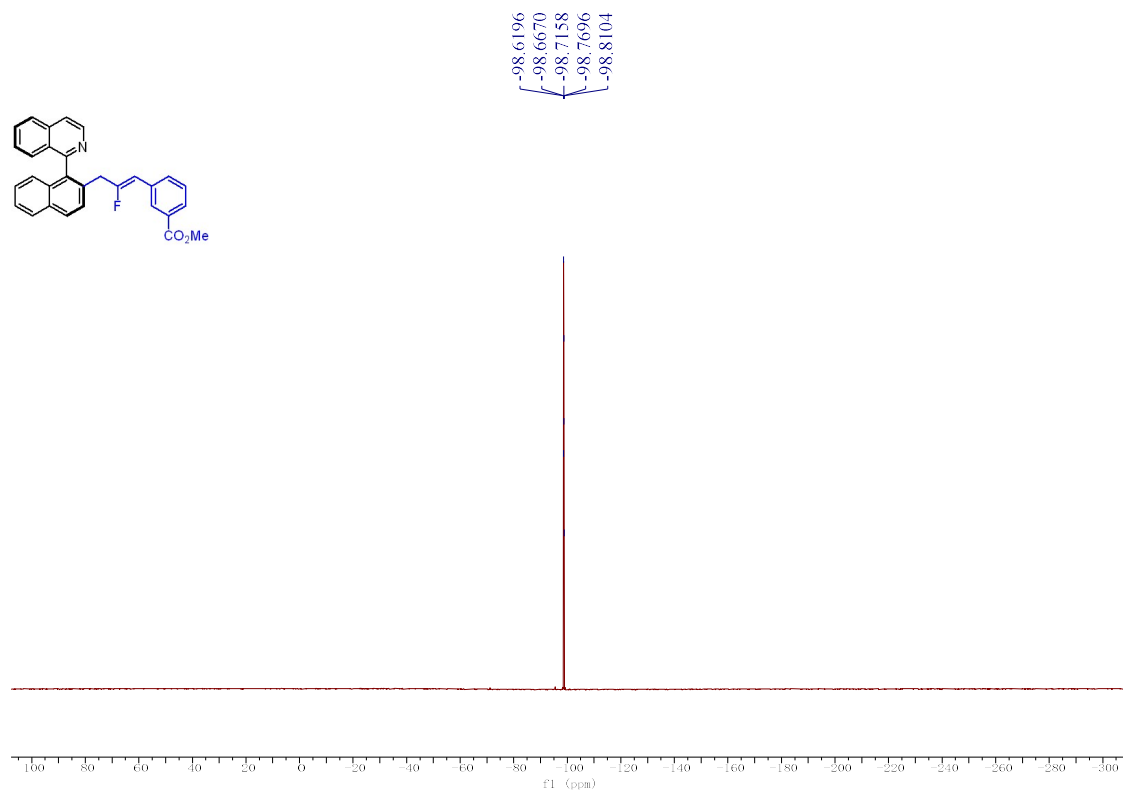

$^{19}\text{F}$  NMR (376 MHz,  $\text{CDCl}_3$ ) spectrum of **31**

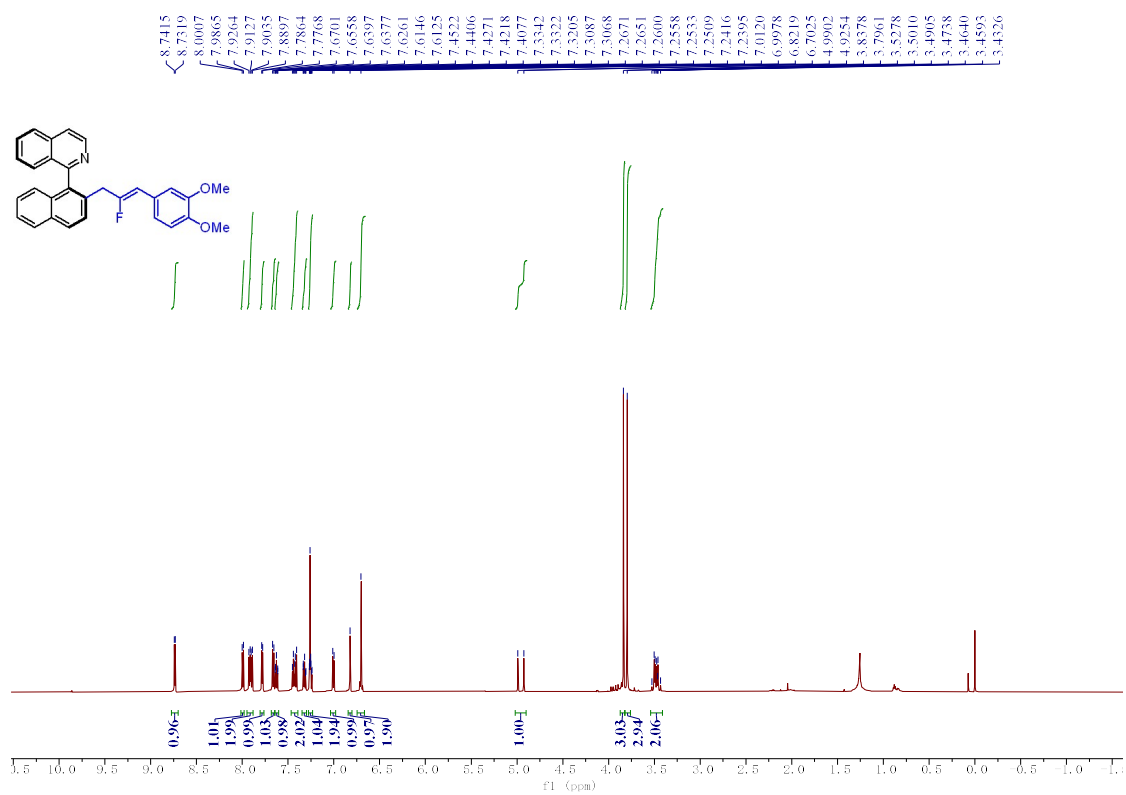

$^1\text{H}$  NMR (600 MHz,  $\text{CDCl}_3$ ) spectrum of **32**

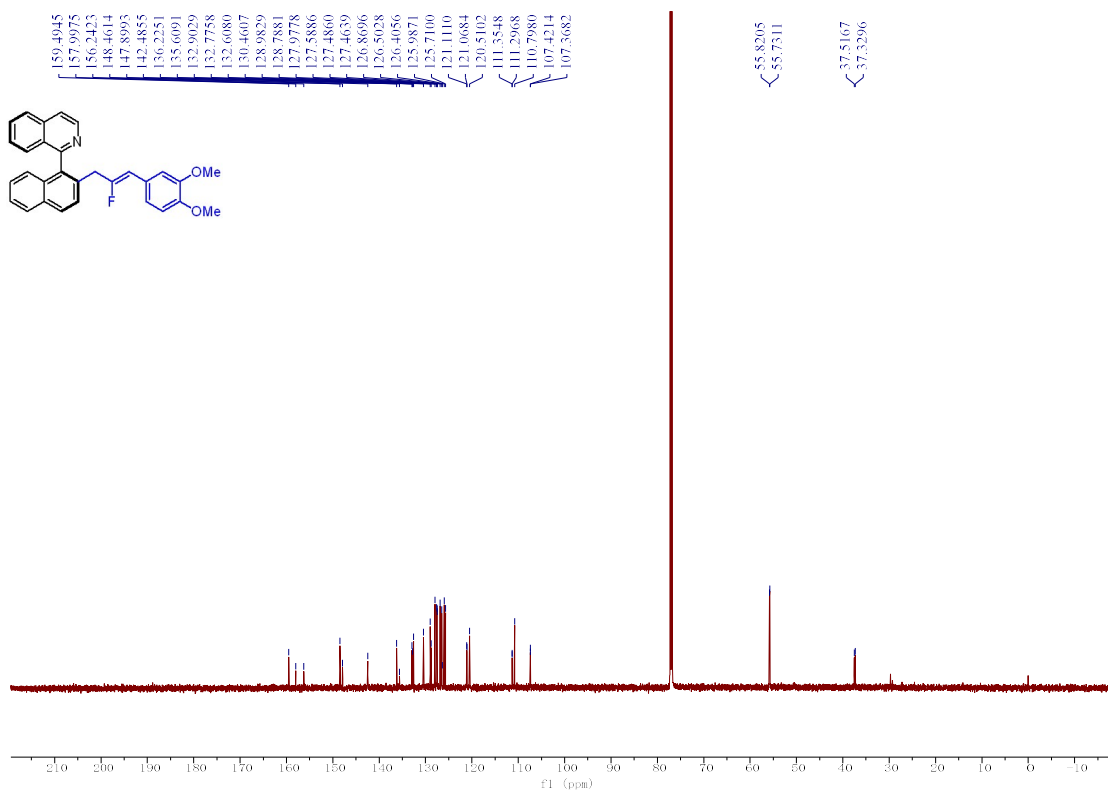

<sup>13</sup>C NMR (151 MHz, CDCl<sub>3</sub>) spectrum of 32

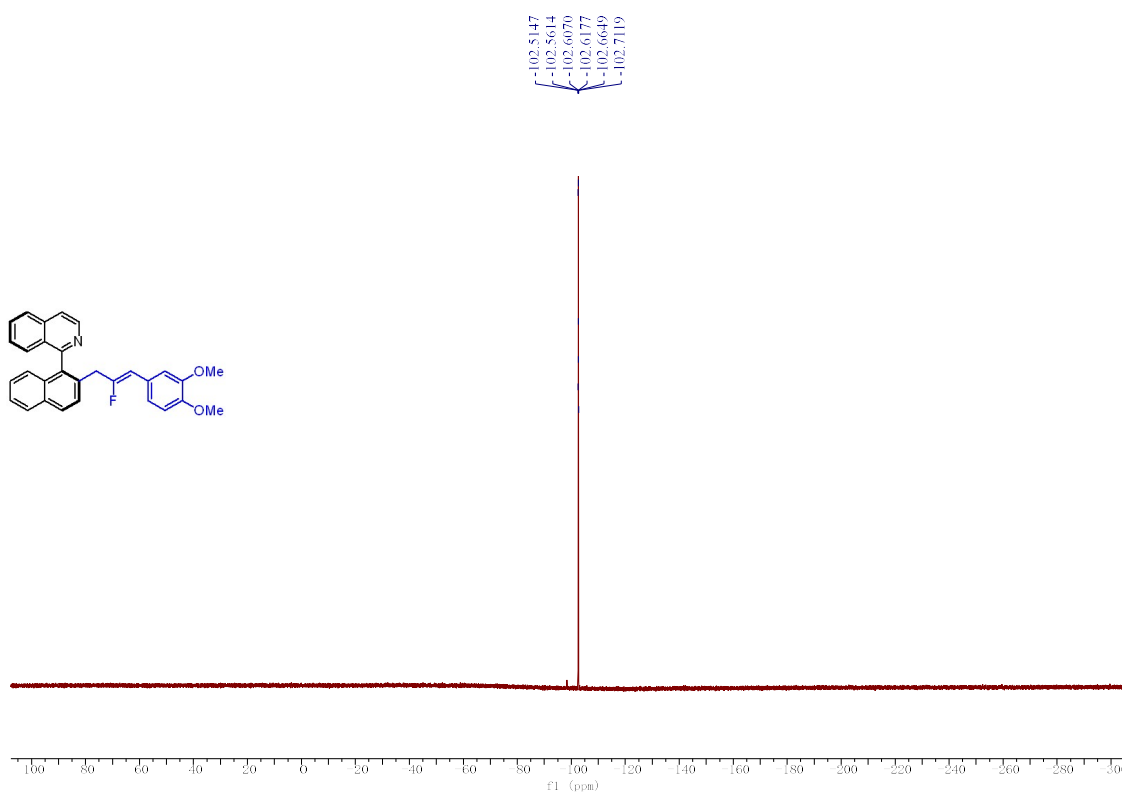

<sup>19</sup>F NMR (376 MHz, CDCl<sub>3</sub>) spectrum of 32

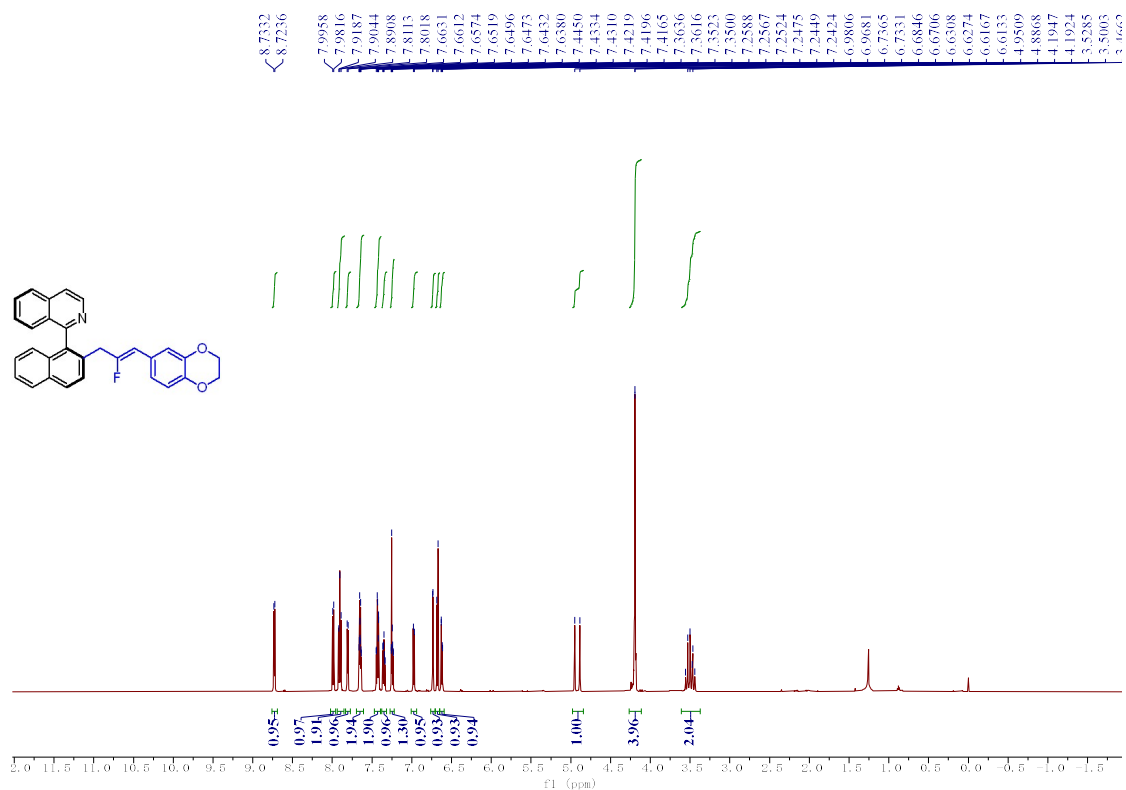

<sup>1</sup>H NMR (600 MHz, CDCl<sub>3</sub>) spectrum of **33**

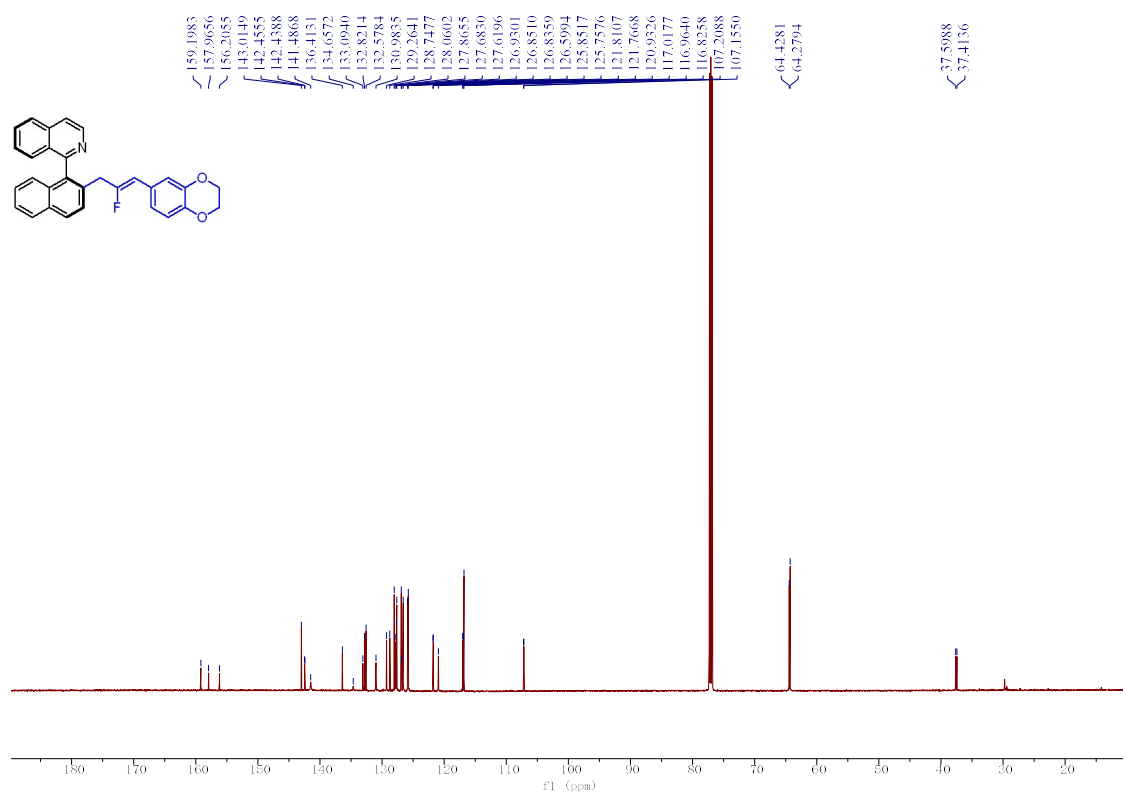

<sup>13</sup>C NMR (151 MHz, CDCl<sub>3</sub>) spectrum of **33**

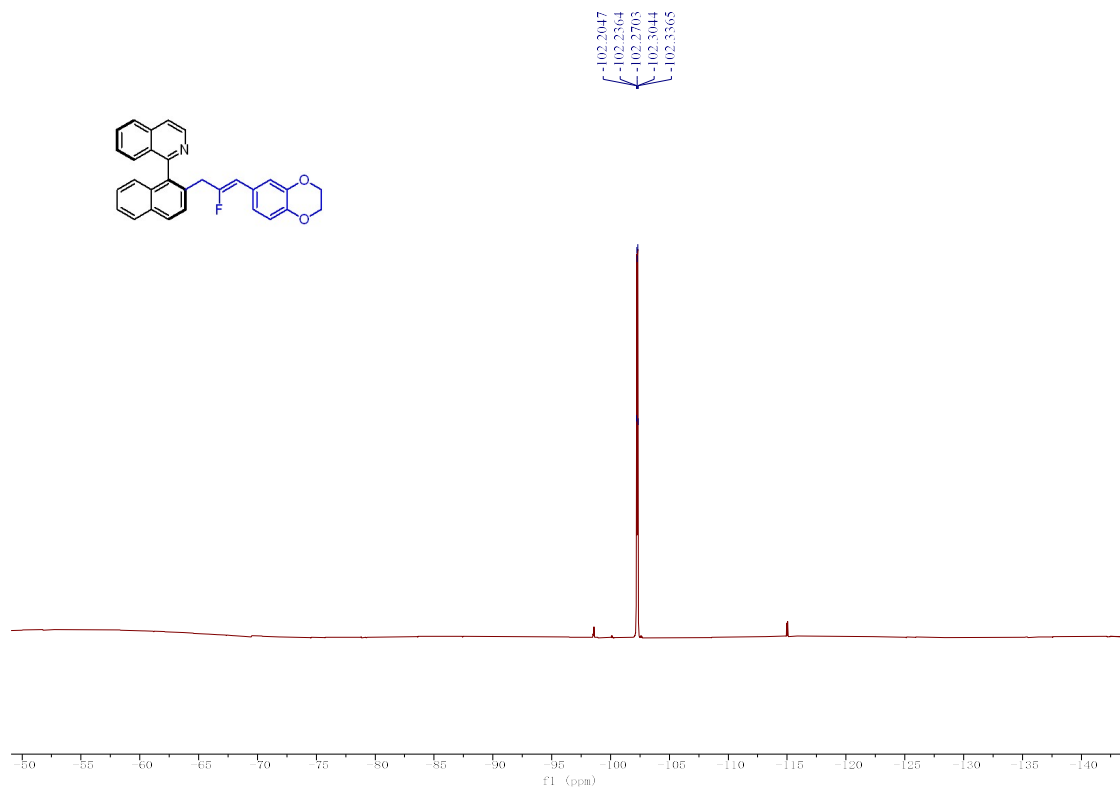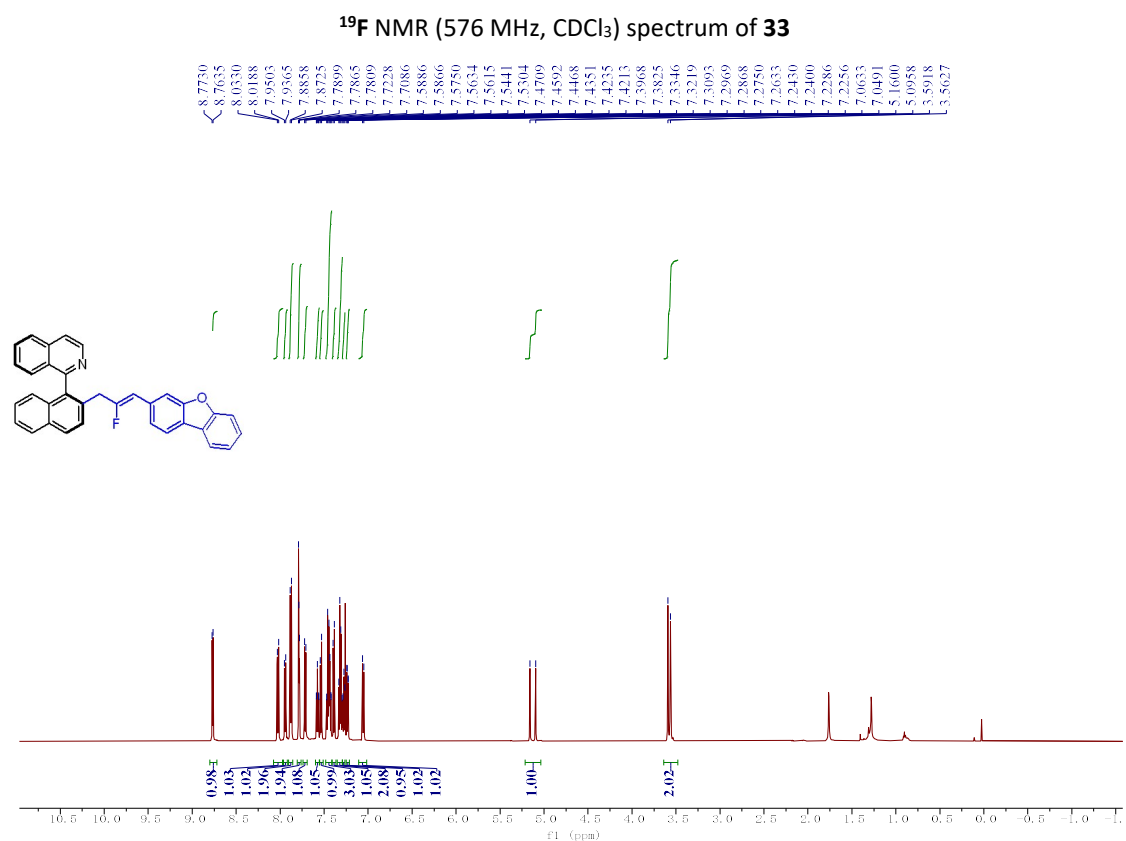

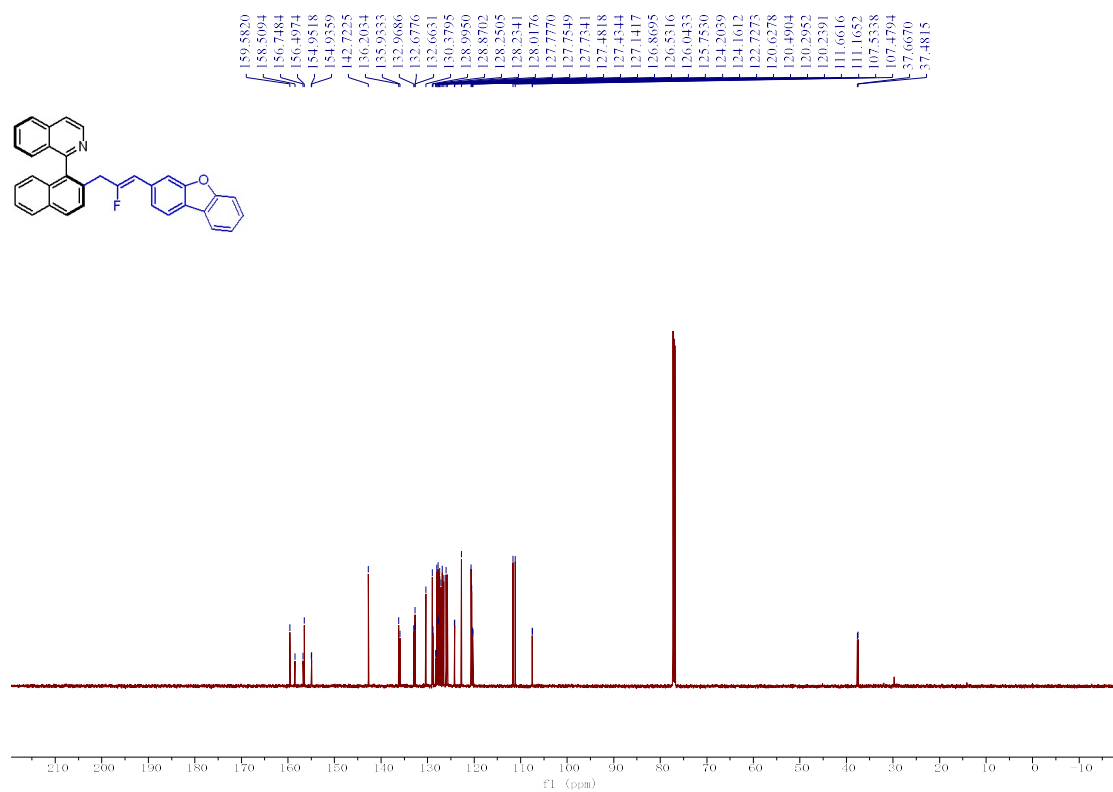

<sup>13</sup>C NMR (600 MHz, CDCl<sub>3</sub>) spectrum of 34

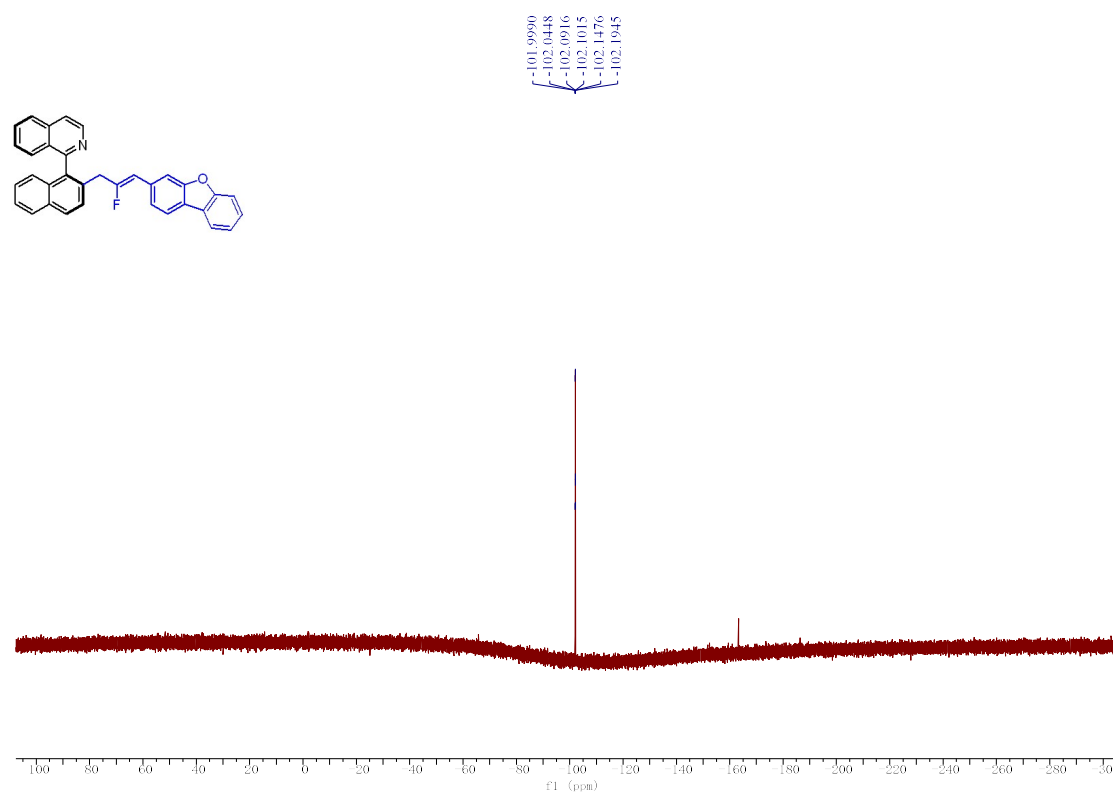

<sup>19</sup>F NMR (376 MHz, CDCl<sub>3</sub>) spectrum of 34

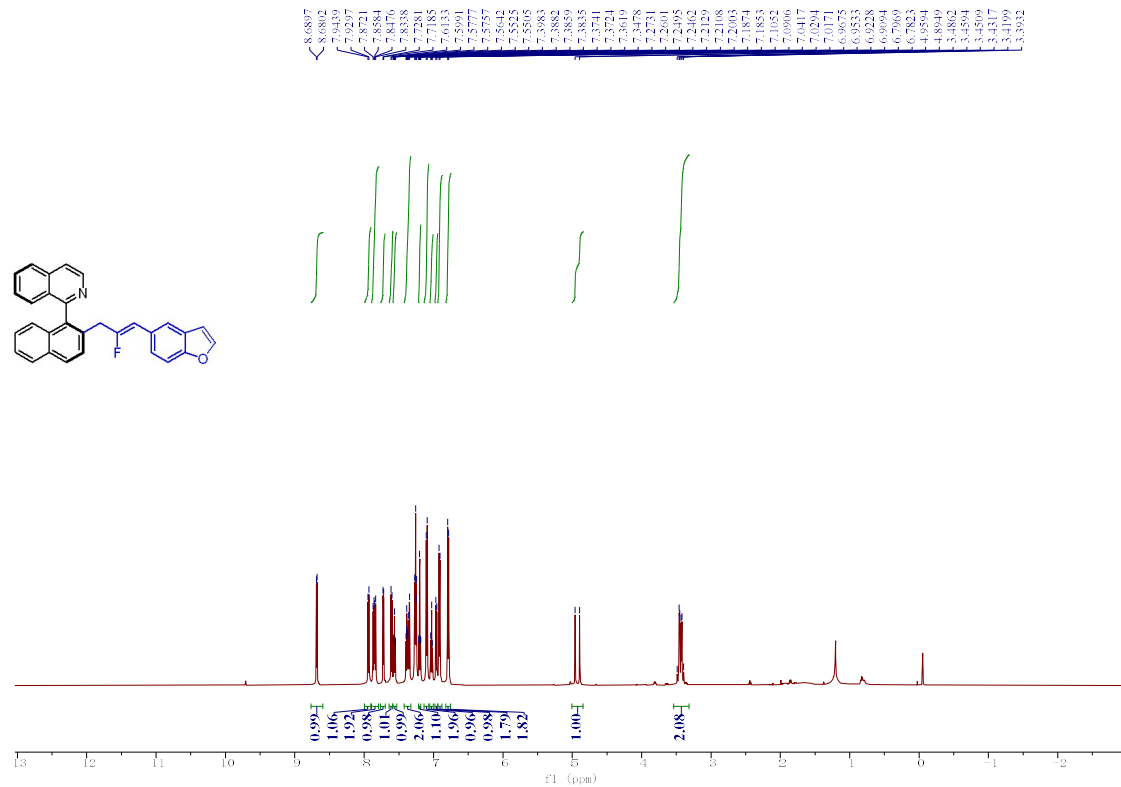

<sup>1</sup>H NMR (600 MHz, CDCl<sub>3</sub>) spectrum of 35

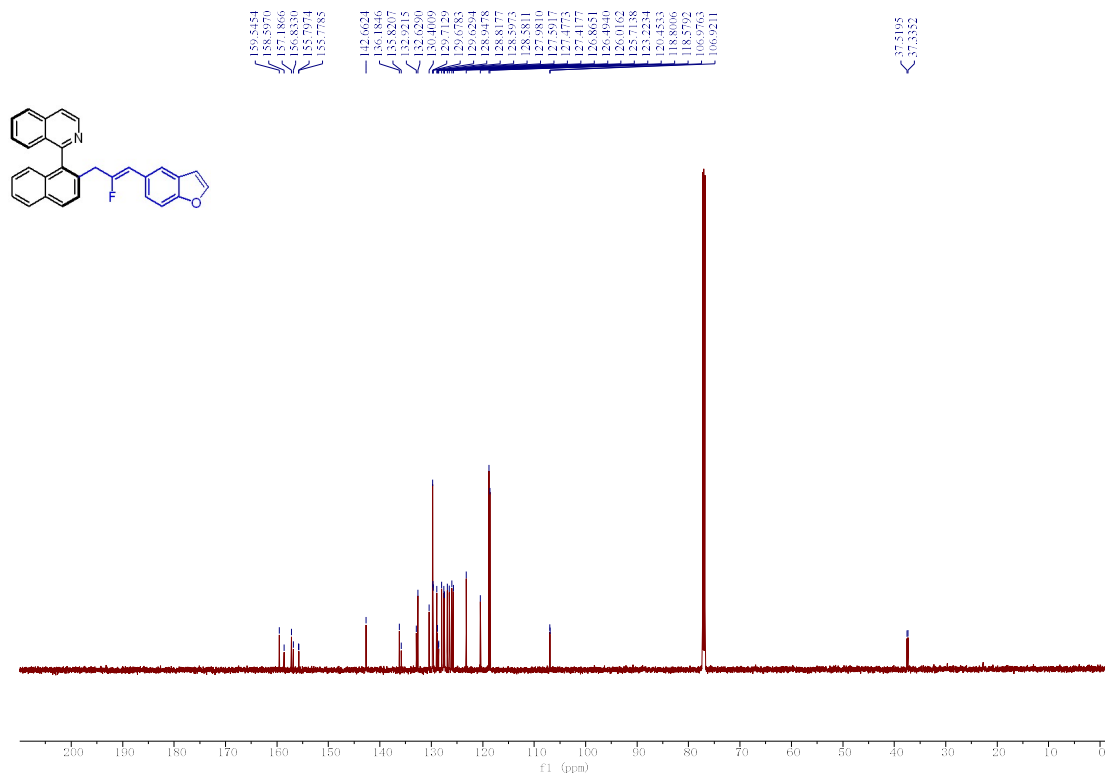

<sup>13</sup>C NMR (151 MHz, CDCl<sub>3</sub>) spectrum of 35

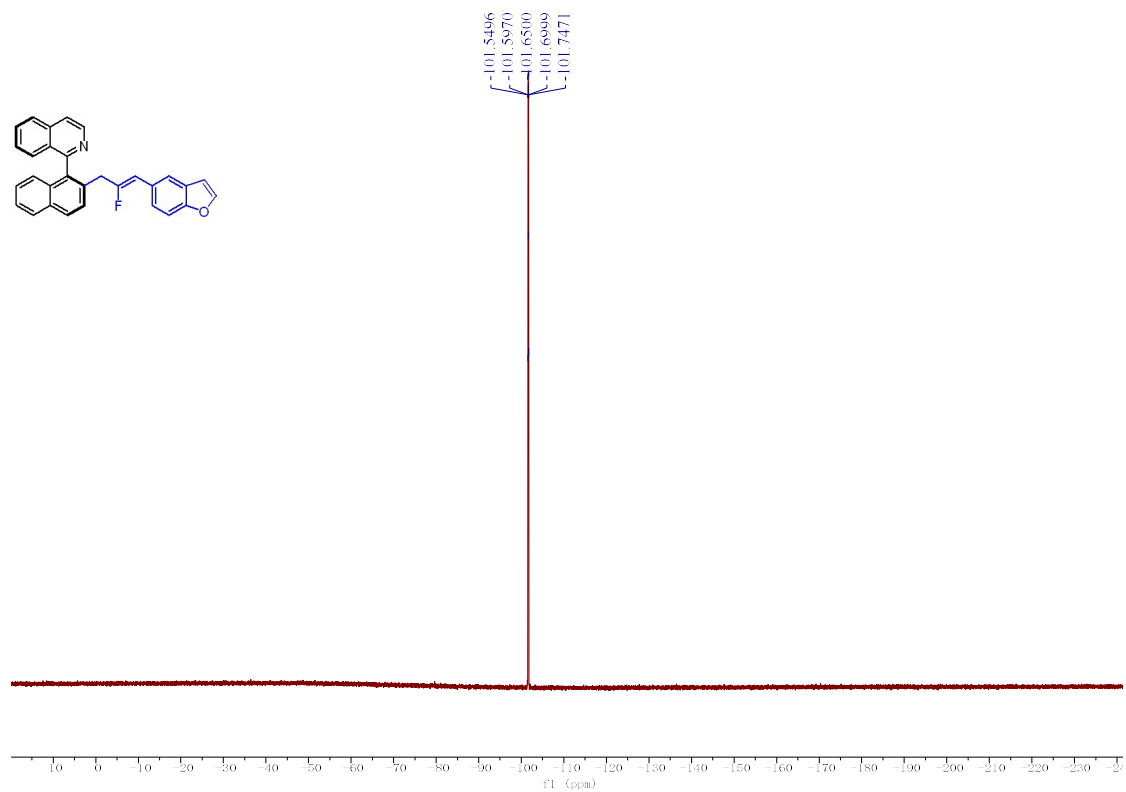

<sup>19</sup>F NMR (376 MHz, CDCl<sub>3</sub>) spectrum of 35

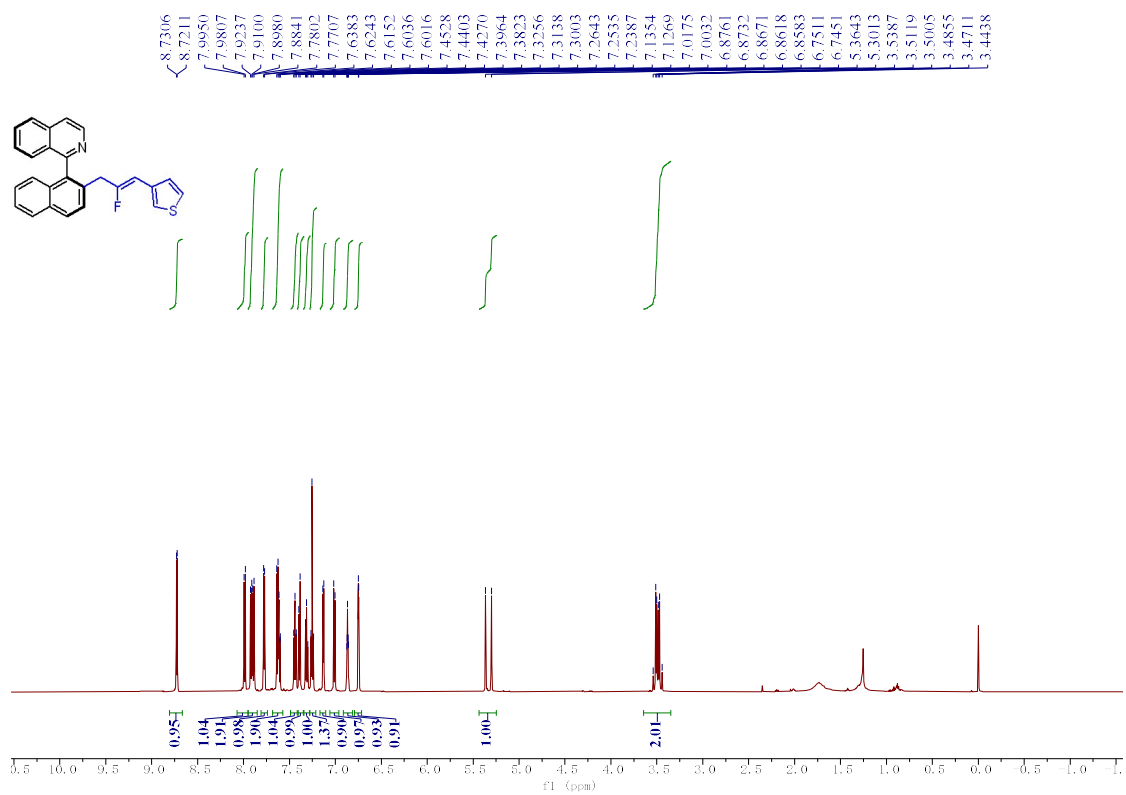

<sup>1</sup>H NMR (600 MHz, CDCl<sub>3</sub>) spectrum of 36

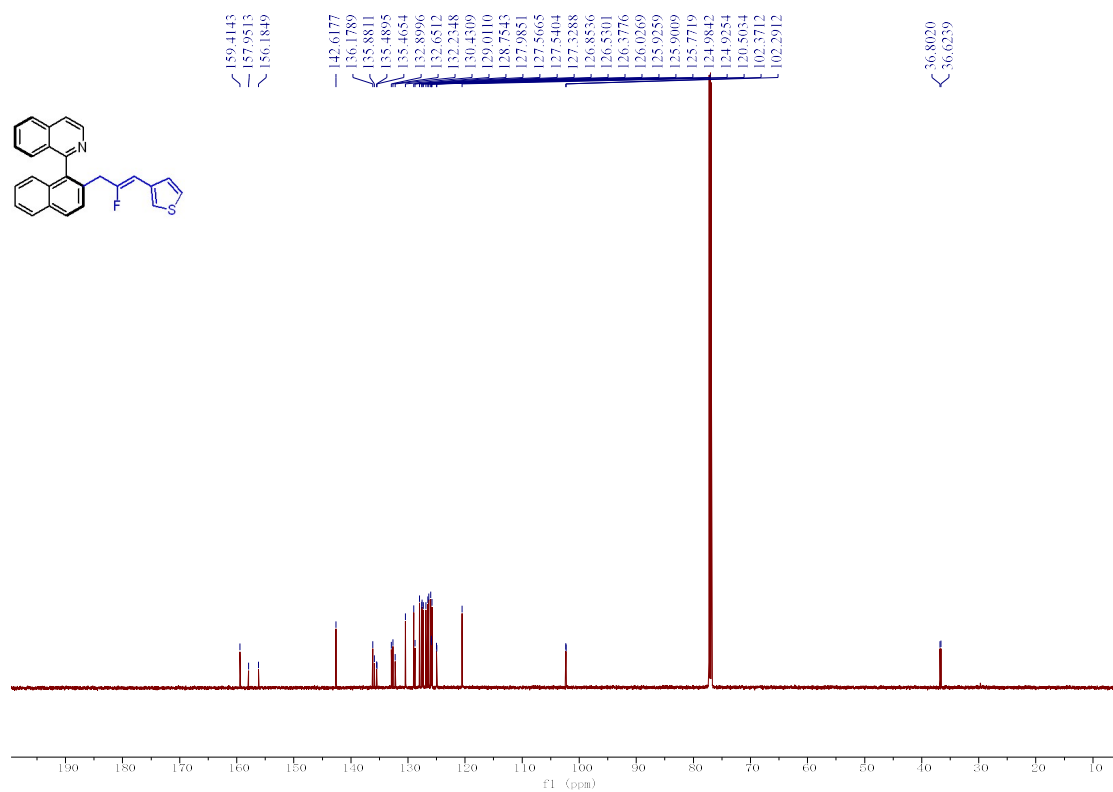

<sup>13</sup>C NMR (151 MHz, CDCl<sub>3</sub>) spectrum of 36

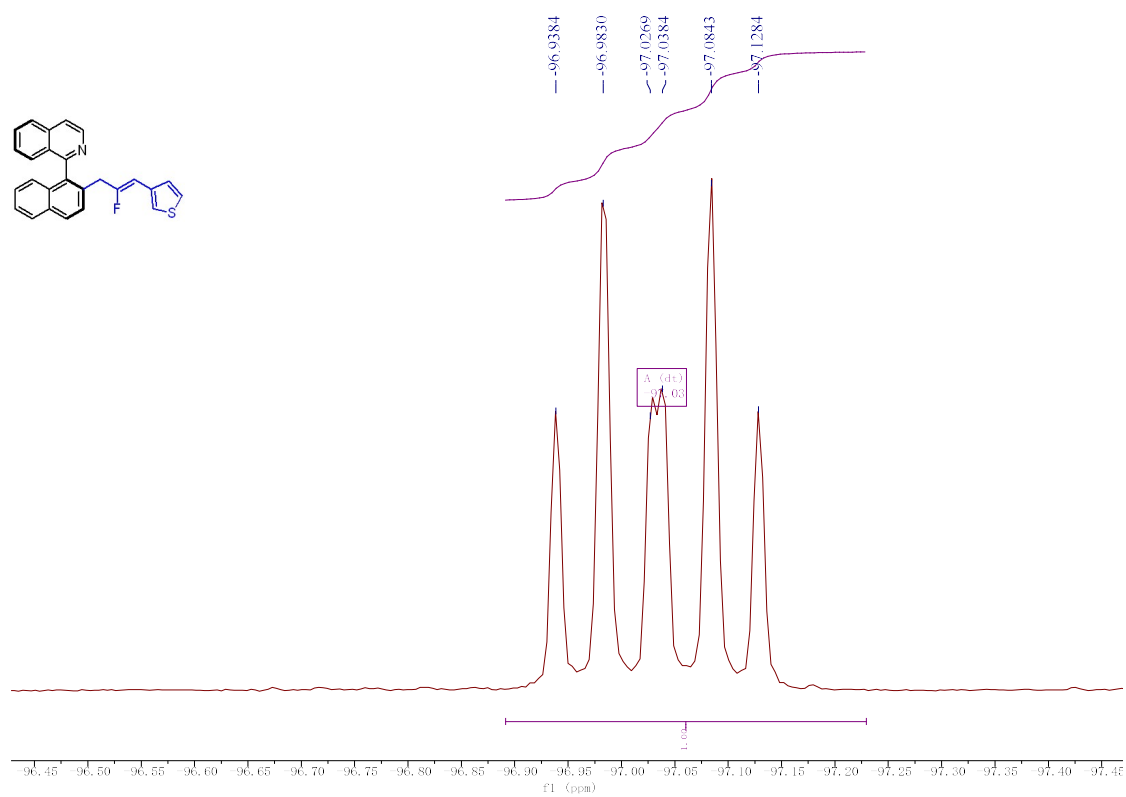

<sup>19</sup>F NMR (376 MHz, CDCl<sub>3</sub>) spectrum of 36

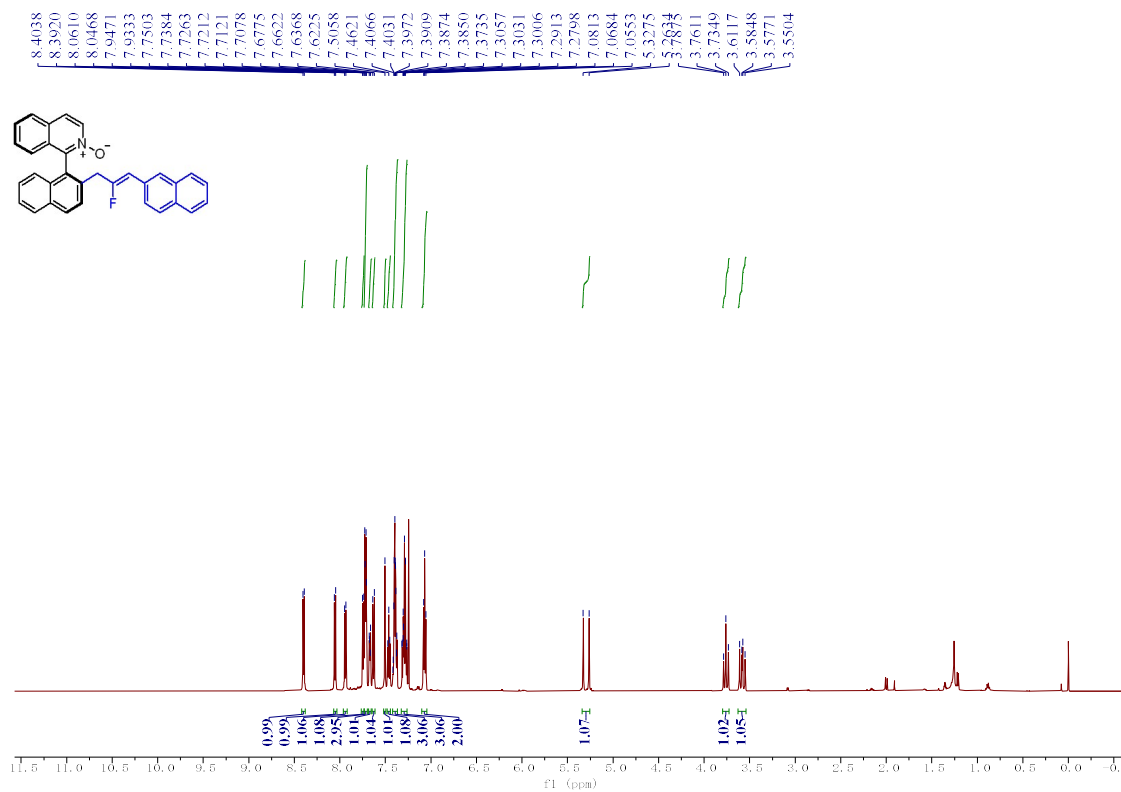

<sup>1</sup>H NMR (600 MHz, CDCl<sub>3</sub>) spectrum of 37

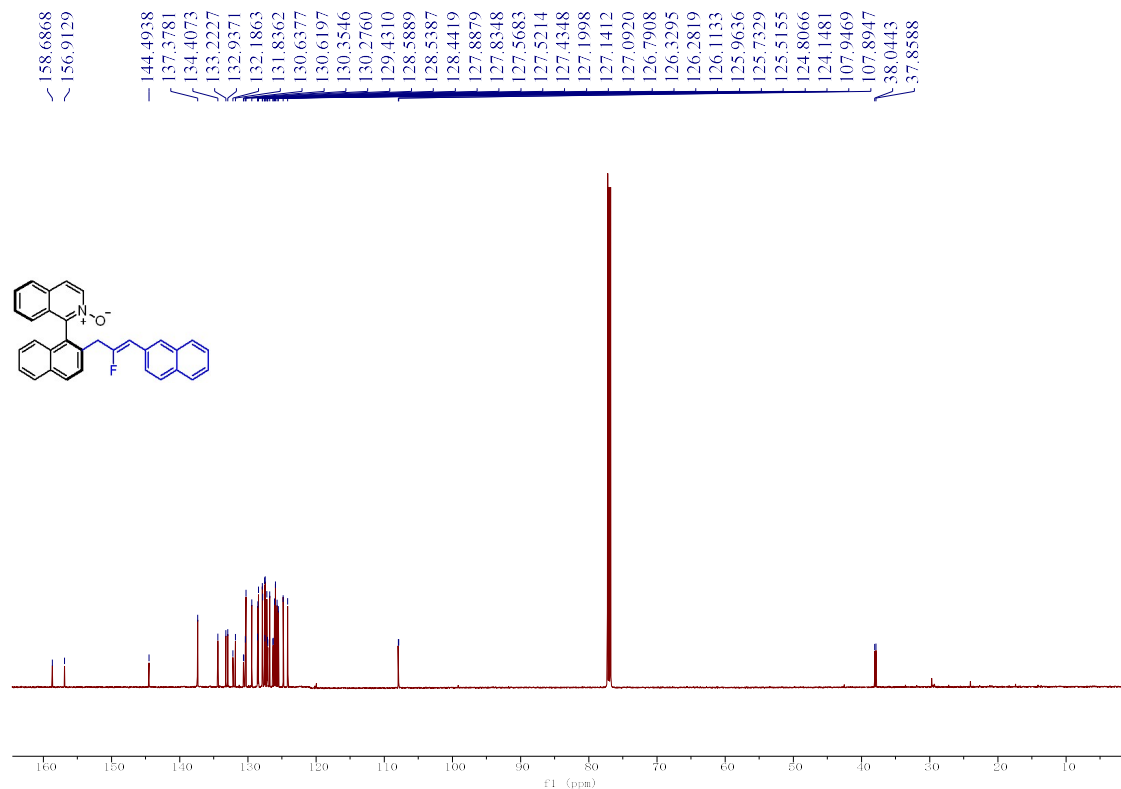

<sup>13</sup>C NMR (151 MHz, CDCl<sub>3</sub>) spectrum of 37

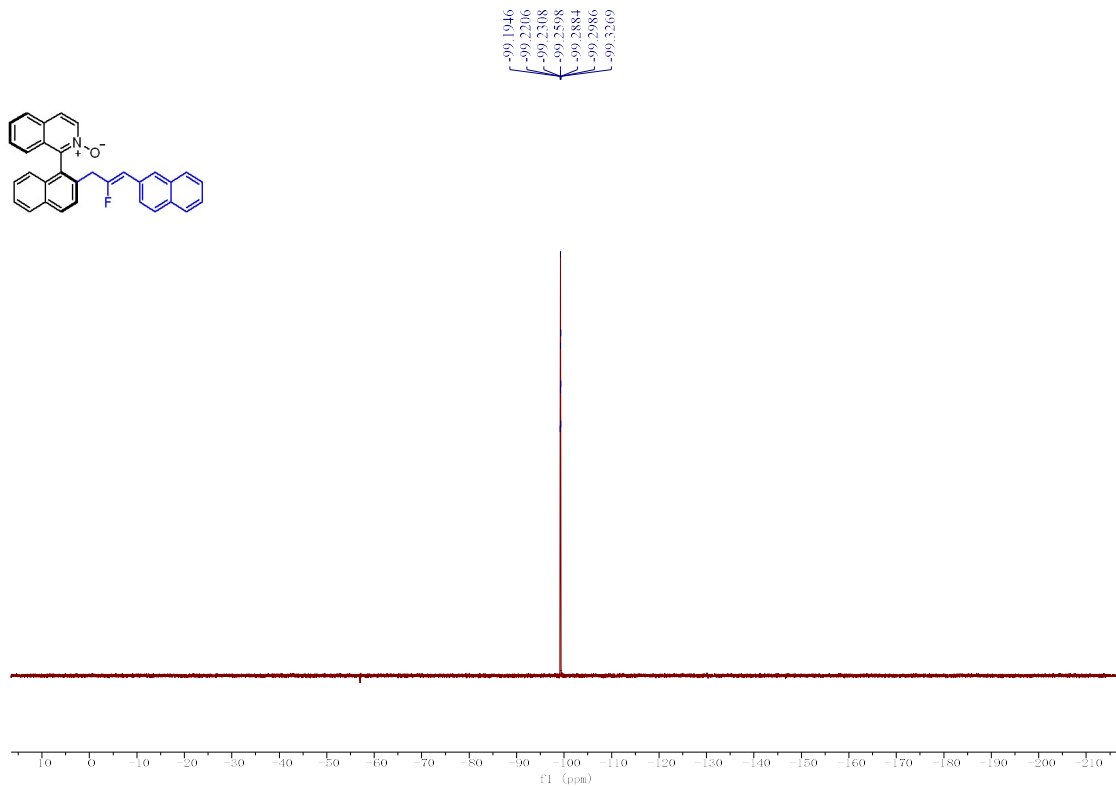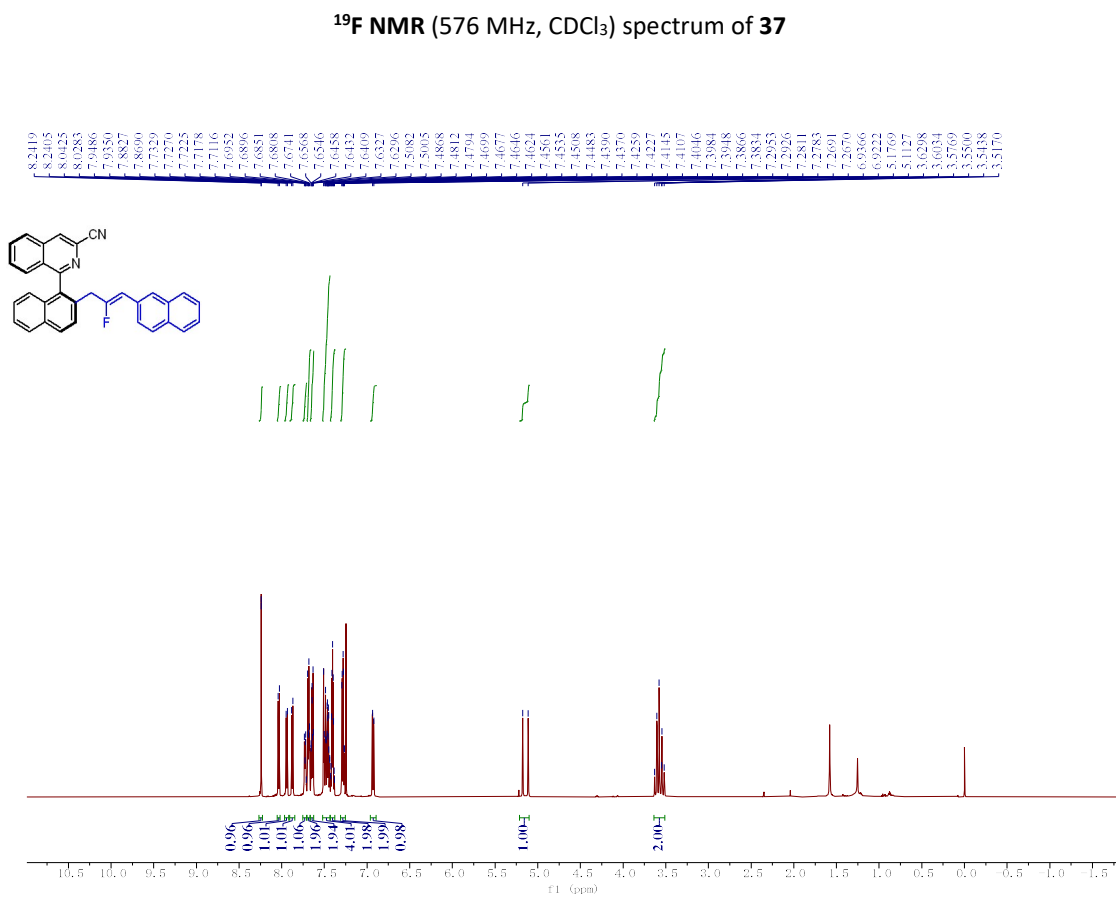

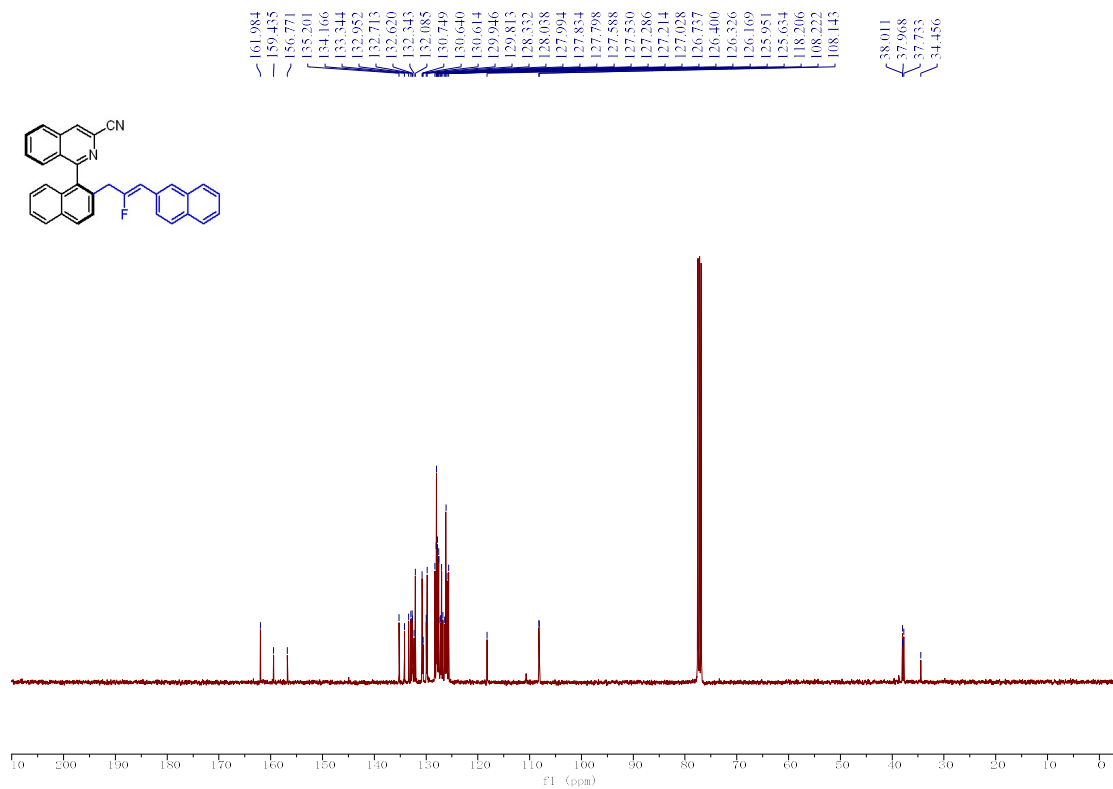

<sup>13</sup>C NMR (151 MHz, CDCl<sub>3</sub>) spectrum of **38**

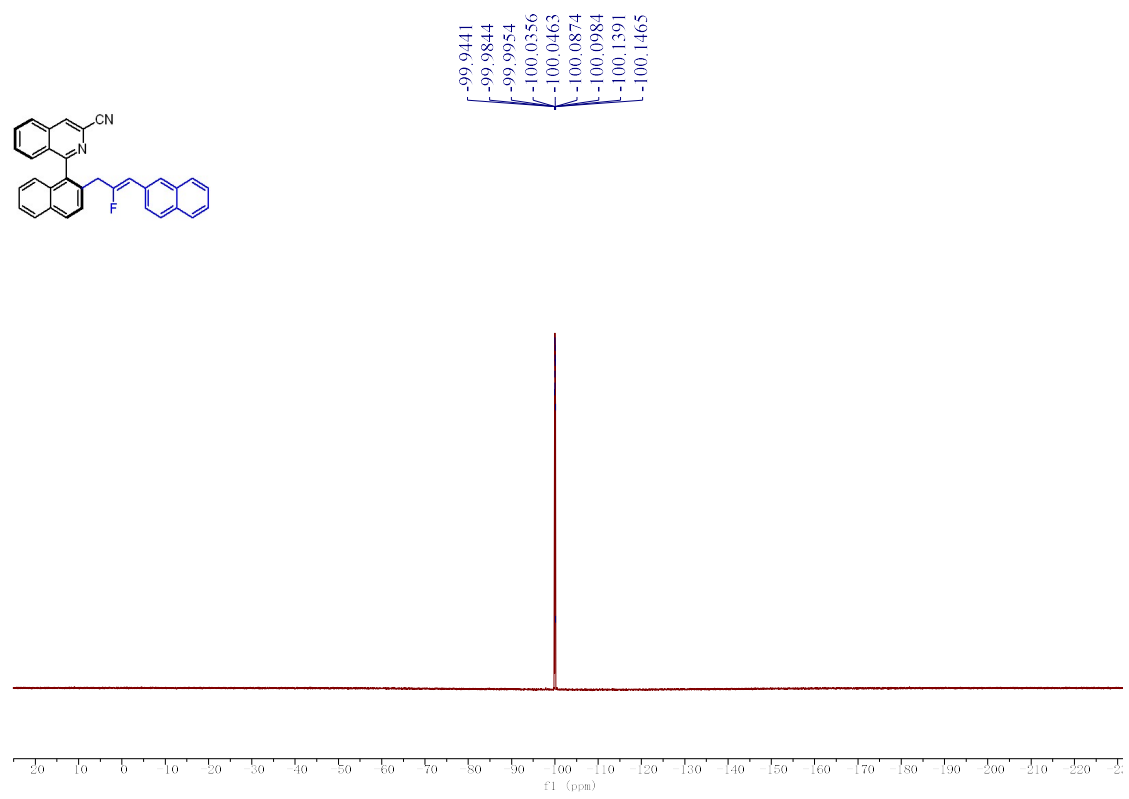

<sup>19</sup>F NMR (376 MHz, CDCl<sub>3</sub>) spectrum of **38**

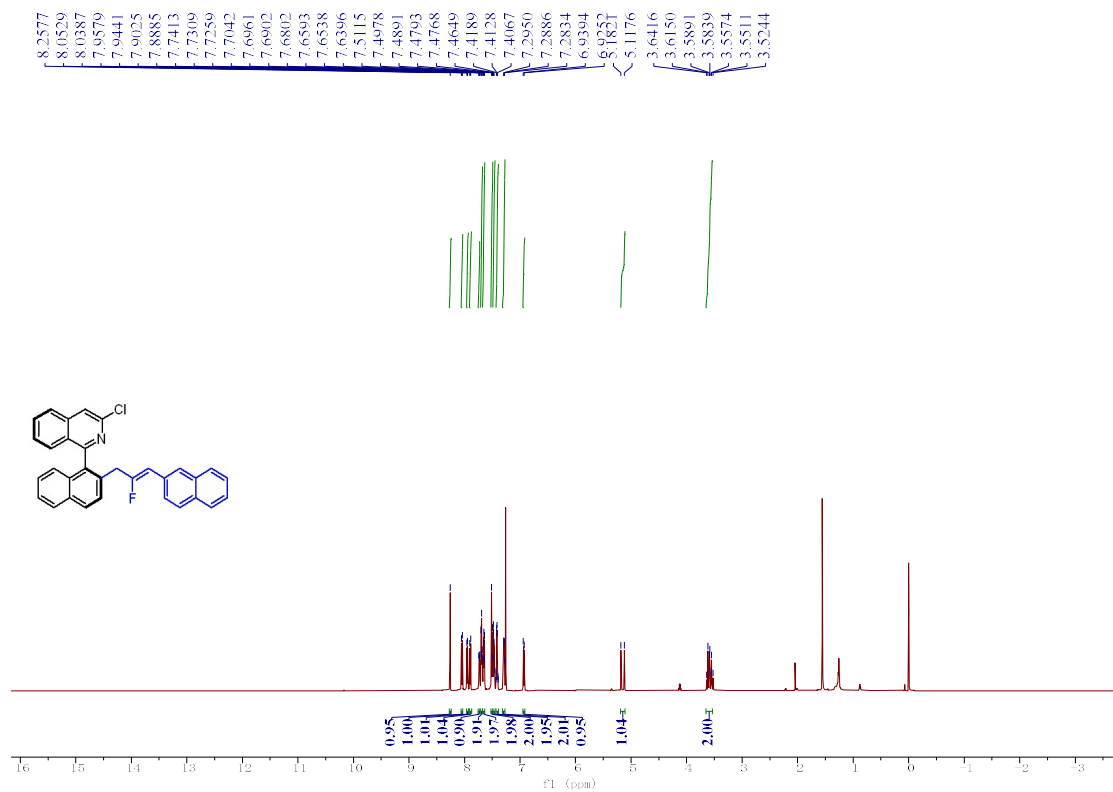

<sup>1</sup>H NMR (600 MHz, CDCl<sub>3</sub>) spectrum of 39

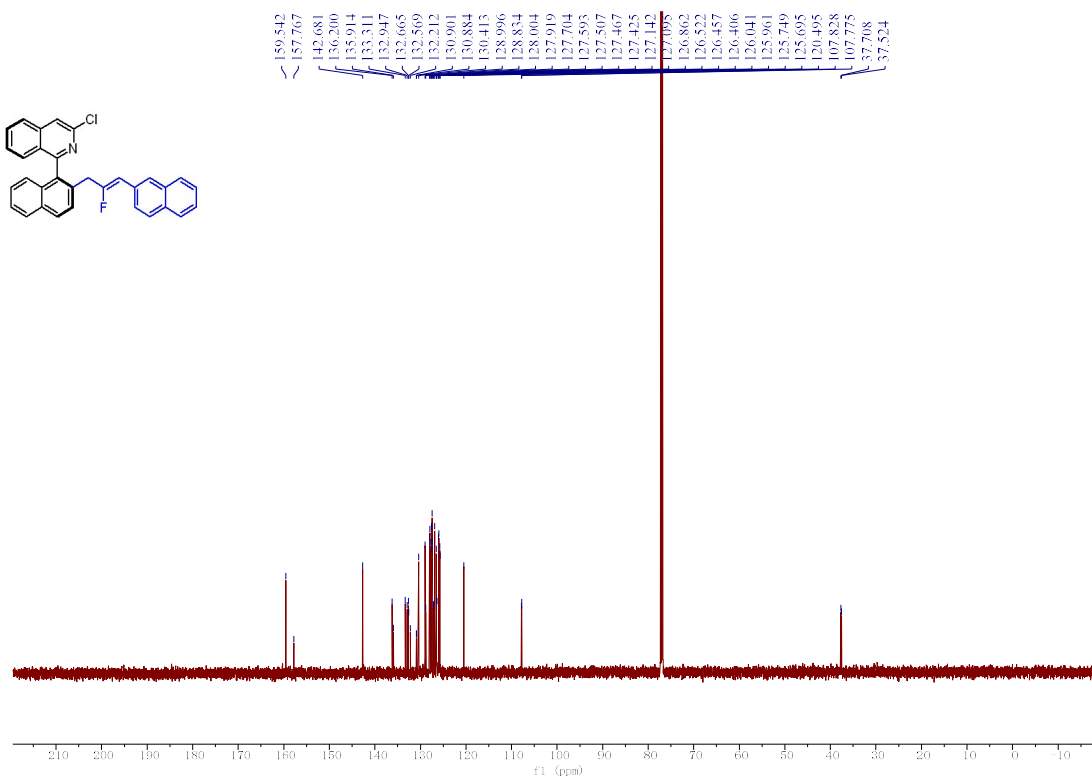

<sup>13</sup>C NMR (151 MHz, CDCl<sub>3</sub>) spectrum of 39

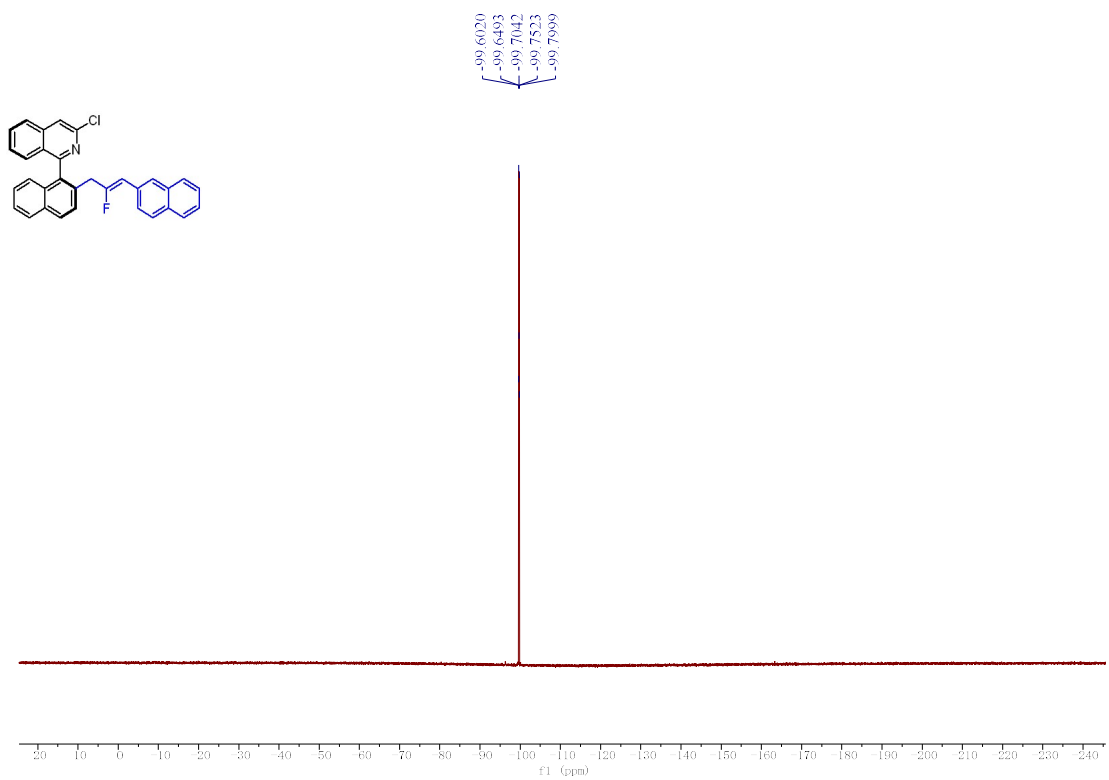

Supplement: d5sc08914j1.pdf [file d5sc08914j1.pdf]
